# Supplementary material for: Analysis of reproduction-related transcriptomes on pineal-hypothalamic-pituitary-ovarian tissues during estrus and anestrus in Tan sheep
Source: Frontiers journal article supplement (doi:10.3389/fvets.2022.1068882), 2022-11-24
Supplement: Data_Sheet_2.PDF [file Data_Sheet_2.PDF]

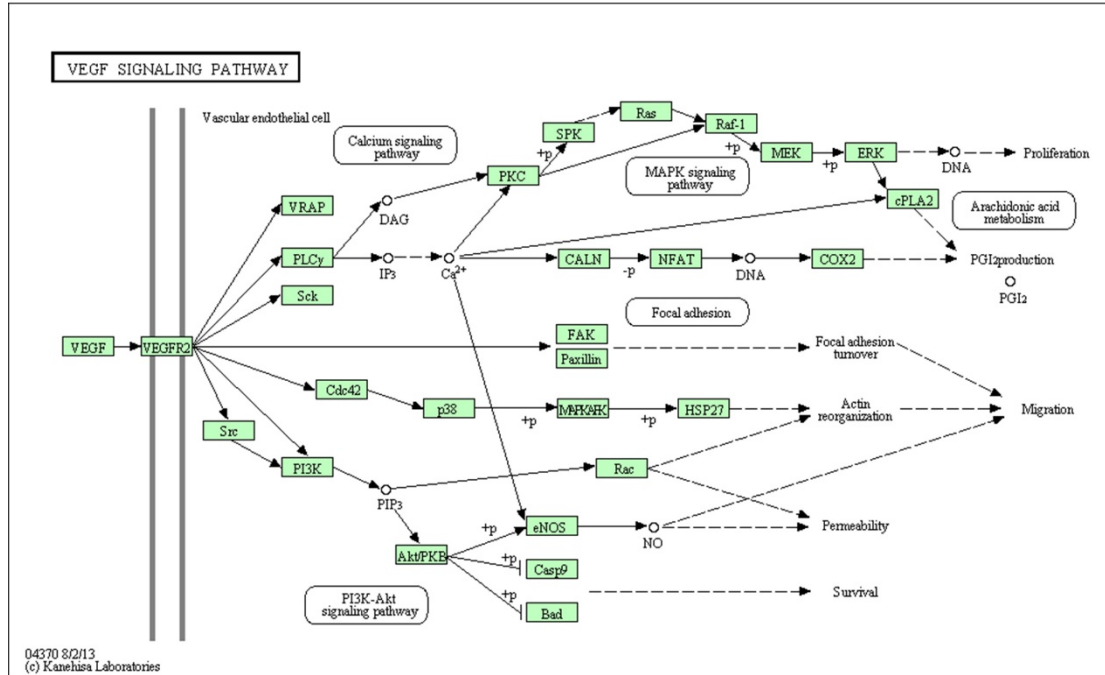

Supplementary Figure S2. VEGF signaling pathway diagram. This pathway also contains three signal transduction pathways, calcium, MAPK, and PI3K/AKT.
