# Supplementary material for: Analysis of reproduction-related transcriptomes on pineal-hypothalamic-pituitary-ovarian tissues during estrus and anestrus in Tan sheep
Source: Front Vet Sci. 2022 Nov 24;9:1068882. doi: 10.3389/fvets.2022.1068882 (PMC9729709; doi:10.3389/fvets.2022.1068882)
Supplement: Supplementary file 3 [file Table_3.XLSX]

## Sheet: Pineal
Supplementary table S3 DEGs identified in pineal gland between estrus group and anestrus group
DEGs	ES1	ES2	ES3	SC1_12	SC1_13	SC1_14	ES	FSC	log2FoldChange	pvalue	padj
SLC24A4	3381.55	2897.94	2992.09	201.566	205.216	187.737	3090.53	198.173	3.96421	8.6976e-149	2.11995e-144
IGSF9B	1613.07	1384.38	1191.44	87.4518	61.0102	62.215	1396.3	70.2257	4.30691	2.99768e-82	1.46131e-78
UBN2	878.422	772.733	811.966	43.7259	33.2783	27.2873	821.04	34.7638	4.5572	1.14315e-80	4.64387e-77
PHC3	1451.02	1214.19	1124.48	92.7842	106.768	102.6	1263.23	100.717	3.6517	1.92593e-79	6.7061e-76
LRIG2	1051.28	1041.71	1071.46	129.045	126.18	116.79	1054.82	124.005	3.08908	2.02988e-78	6.18454e-75
IGF2R	1890.64	1824.32	1772.75	168.505	110.928	103.692	1829.24	127.708	3.8355	1.10089e-75	2.68331e-72
ZFHX2	868.449	1084.26	921.717	78.9199	87.3555	63.3065	958.141	76.5273	3.65279	2.50997e-67	3.05891e-64
TNRC6C	2008.65	1758.97	1812.74	223.962	141.433	203.017	1860.12	189.471	3.28898	2.28545e-62	1.35867e-59
CACNA1C	895.874	819.081	725.468	87.4518	76.2627	74.2214	813.475	79.312	3.3565	4.14903e-62	2.29837e-59
-	546.832	544.788	550.612	27.7286	40.2113	42.5682	547.411	36.836	3.90079	2.12984e-58	8.11136e-56
-	589.216	630.647	533.87	39.4599	20.7989	31.6533	584.578	30.6374	4.23248	4.3619e-58	1.56348e-55
SEL1L	1552.41	1160.24	1257.48	162.106	123.407	142.985	1323.37	142.833	3.20737	4.93378e-58	1.74284e-55
USF3	855.152	713.467	661.292	77.8534	66.5566	63.3065	743.304	69.2388	3.42214	9.22932e-56	2.74336e-53
-	1320.54	1067.54	1267.71	164.239	110.928	116.79	1218.6	130.652	3.21611	4.5162e-53	1.06872e-50
HIVEP3	685.618	576.7	559.913	62.9226	51.304	46.9341	607.41	53.7203	3.49605	2.6692e-52	5.86118e-50
PODXL	1311.4	844.915	899.395	70.388	42.9844	40.3852	1018.57	51.2525	4.30524	6.13052e-52	1.28815e-49
ZBTB20	1496.72	877.587	916.136	43.7259	62.3968	32.7447	1096.82	46.2891	4.57992	3.97806e-51	7.40163e-49
MDM4	417.188	422.458	439.931	31.9945	36.0515	26.1958	426.526	31.4139	3.77282	1.86876e-50	3.25351e-48
TMEM245	634.093	521.993	552.472	62.9226	56.8504	62.215	569.519	60.6627	3.22729	2.37206e-50	4.10046e-48
SLC7A5	3006.75	2436.73	2012.71	234.627	191.35	124.43	2485.39	183.469	3.76023	4.0227e-50	6.76202e-48
FRMPD2	7408.83	7390.73	7728.1	1076.08	604.555	687.64	7509.22	789.426	3.24842	4.37377e-50	7.30179e-48
RPL39	823.572	727.904	602.697	4867.44	7931.32	6436.53	718.058	6411.76	-3.15803	1.11934e-49	1.79493e-47
ASTN1	2314.48	1879.02	1925.28	245.292	144.206	140.802	2039.6	176.767	3.52445	1.38805e-49	2.21126e-47
-	295.854	213.508	223.221	1818.36	2817.56	2219	244.195	2284.97	-3.22564	4.16056e-49	6.3381e-47
-	361.508	351.795	356.223	12.7978	15.2525	12.0064	356.509	13.3523	4.75107	6.62175e-49	9.7228e-47
ATP5I	186.156	176.277	193.458	1338.44	2390.49	2096.76	185.297	1941.89	-3.38954	4.34339e-48	5.98112e-46
ABL2	1037.15	778.051	774.763	92.7842	66.5566	93.8683	863.322	84.403	3.34658	4.80049e-48	6.57344e-46
SOGA1	873.436	604.054	602.697	62.9226	48.5308	55.6661	693.395	55.7065	3.63175	2.72241e-46	3.11531e-44
-	477.855	487.042	353.433	23.4627	15.2525	13.0979	439.443	17.271	4.65931	3.66457e-46	4.11615e-44
-	1357.94	2084.93	1702.99	193.034	126.18	114.607	1715.29	144.607	3.56528	9.63491e-46	1.03912e-43
BMPR2	2213.09	1395.02	1596.96	161.039	81.8091	112.424	1735.02	118.424	3.86604	1.17229e-45	1.24775e-43
LOC101103815	197.79	173.998	307.859	1971.93	2035.52	2049.82	226.549	2019.09	-3.15875	1.32863e-45	1.40191e-43
SLC12A5	14422.1	16215.2	14486.1	2302.54	1261.8	1468.06	15041.1	1677.47	3.16392	4.40448e-45	4.31144e-43
CHRNA2	9260.41	6794.27	6005.57	947.039	707.163	1030.37	7353.42	894.857	3.03772	5.84353e-45	5.65199e-43
PPEF2	15987.8	18569.9	18323.7	2757.93	1521.09	2182.98	17627.1	2154	3.03209	1.38451e-44	1.2639e-42
SEMA3G	701.408	670.917	818.477	87.4518	52.6906	84.0449	730.267	74.7291	3.27625	1.47256e-44	1.32934e-42
-	401.398	511.356	430.63	24.5292	30.5051	13.0979	447.795	22.7107	4.32315	2.9003e-44	2.51572e-42
PHPT1	148.758	170.959	209.27	1227.52	1894.09	1422.21	176.329	1514.61	-3.10334	1.10469e-43	9.04093e-42
UGGT1	1688.7	1151.88	1402.57	195.167	127.567	173.547	1414.38	165.427	3.09066	1.41648e-42	1.07555e-40
TMED8	507.773	408.021	492.016	55.4572	51.304	51.3001	469.27	52.6871	3.15274	2.76963e-42	2.06443e-40
HCFC1	522.732	461.208	462.253	56.5237	29.1185	39.2937	482.064	41.6453	3.51627	6.22215e-40	3.98054e-38
CDKL5	482.01	327.481	360.874	15.9973	24.9587	22.9213	390.122	21.2924	4.20792	1.03562e-39	6.48902e-38
LOC101116390	448.768	458.169	406.448	28.7951	36.0515	51.3001	437.795	38.7156	3.49721	1.24801e-39	7.75997e-38
LOC101110527	996.431	736.261	973.802	6487.43	10597.7	6214.95	902.165	7766.71	-3.10594	2.16153e-39	1.31384e-37
ATP7A	649.052	426.257	460.393	34.1275	13.8659	29.4703	511.9	25.8212	4.28377	6.74729e-39	3.96285e-37
PGAP1	721.353	622.289	655.712	74.6539	61.0102	104.783	666.451	80.1491	3.04713	1.21045e-38	7.00797e-37
CXHXorf36	459.572	281.892	346.923	14.9308	11.0928	16.3724	362.795	14.132	4.66648	1.98341e-38	1.12952e-36
-	64.8221	101.055	123.702	859.587	869.395	789.148	96.5264	839.377	-3.12279	3.68383e-38	2.04532e-36
PEG3	404.722	340.397	358.084	40.5264	34.6649	25.1043	367.734	33.4319	3.46021	4.14138e-37	2.14314e-35
TANC2	1944.66	1373.75	1403.5	210.098	112.314	177.913	1573.97	166.775	3.23259	4.16911e-37	2.14837e-35
LOC105605844	316.631	287.97	264.145	22.3962	18.0257	16.3724	289.582	18.9314	3.93076	4.41474e-37	2.27014e-35
LOC101115805	3720.62	2092.53	2886.06	361.538	354.968	240.128	2899.74	318.878	3.18573	5.04089e-37	2.57582e-35
HS2ST1	1367.91	956.608	925.437	153.574	94.2885	113.515	1083.32	120.459	3.16332	1.36401e-36	6.78497e-35
PTPRB	2798.98	2105.45	2249.88	306.081	195.51	373.29	2384.77	291.627	3.028	6.864e-36	3.21119e-34
TET1	1764.32	1329.68	1604.4	129.045	55.4638	151.717	1566.13	112.075	3.79563	7.7251e-36	3.60712e-34
AANAT	1923.89	1650.32	2535.42	32476.6	15216.5	19320.5	2036.54	22337.9	-3.4555	1.46411e-35	6.72058e-34
TTC28	5548.1	3972.32	3102.77	603.63	391.02	504.269	4207.73	499.64	3.07267	1.77605e-35	8.10665e-34
LOC105602261	423.005	554.666	564.563	58.6567	29.1185	33.8362	514.078	40.5371	3.6505	3.40706e-35	1.53785e-33
LOC105604154	75.6257	101.055	108.82	661.221	1249.32	1045.65	95.1672	985.397	-3.37215	6.33402e-35	2.77173e-33
FOXO3	388.101	336.598	333.901	45.8588	40.2113	31.6533	352.867	39.2411	3.16923	2.09837e-34	8.86105e-33
-	307.489	423.217	321.81	35.194	31.8917	29.4703	350.839	32.1853	3.44609	2.94621e-34	1.22754e-32
-	517.745	438.414	424.12	60.7896	30.5051	41.4767	460.093	44.2571	3.36245	4.46699e-34	1.82989e-32
-	450.43	312.284	788.714	20.2632	11.0928	13.0979	517.143	14.818	5.10893	1.39301e-33	5.52983e-32
SLC7A1	1480.93	915.578	758.951	94.9172	97.0616	58.9405	1051.82	83.6398	3.65609	2.15379e-33	8.45353e-32
-	573.426	295.568	563.633	24.5292	18.0257	30.5618	477.542	24.3722	4.27912	3.44757e-33	1.34235e-31
SYT16	1426.09	1111.61	897.534	153.574	94.2885	158.266	1145.08	135.376	3.07439	1.37503e-32	5.15614e-31
NDUFB1	368.987	228.705	200.899	1713.84	2409.9	2434.03	266.197	2185.92	-3.03699	2.18529e-32	8.07035e-31
RORA	2354.37	1256.74	1505.81	230.361	148.366	158.266	1705.64	178.998	3.24962	7.09817e-32	2.52016e-30
-	341.562	593.416	310.649	25.5956	16.6391	22.9213	415.209	21.7187	4.24493	1.11526e-31	3.89445e-30
IMPG2	17338.2	13286.9	12794.3	1978.33	777.88	1277.05	14473.1	1344.42	3.42755	1.23075e-31	4.25507e-30
-	521.901	531.111	386.916	58.6567	36.0515	62.215	479.976	52.3077	3.18545	1.57796e-31	5.39427e-30
-	337.407	543.268	454.813	50.1248	41.5978	51.3001	445.163	47.6742	3.21771	2.709e-31	9.14532e-30
RBP1	457.91	499.199	616.648	4890.9	5972.06	2715.63	524.586	4526.2	-3.10922	3.29817e-30	1.02932e-28
LOC101107920	132.968	94.2172	109.75	653.755	1290.92	1115.5	112.312	1020.06	-3.18297	3.33125e-30	1.03831e-28
-	926.623	553.906	486.436	67.1885	49.9174	39.2937	655.655	52.1332	3.65068	5.57301e-30	1.69372e-28
RGS5	6035.1	2607.69	3499.92	435.126	346.649	470.433	4047.57	417.402	3.27657	7.24951e-30	2.17878e-28
NT5C	113.854	84.3396	117.191	900.113	1152.26	609.052	105.128	887.142	-3.07813	8.06456e-30	2.42076e-28
FLT1	2248	878.347	1236.09	126.912	67.9431	90.5938	1454.14	95.1495	3.92886	2.8106e-29	8.11676e-28
MIF	9.97262	7.59816	13.9513	157.84	274.546	229.213	10.5074	220.533	-4.40515	1.12512e-28	3.11987e-27
SLC1A2	2741.64	1621.45	1269.57	241.026	181.644	210.658	1877.55	211.109	3.15123	1.30395e-28	3.59123e-27
-	652.376	442.213	496.667	58.6567	47.1442	82.9534	530.418	62.9181	3.06714	1.55247e-28	4.24691e-27
LOC101123133	30.7489	37.231	35.3433	255.956	519.973	461.701	34.4411	412.543	-3.58023	1.68425e-28	4.60222e-27
LOC105602262	237.681	389.785	377.616	26.6621	11.0928	10.9149	335.027	16.2233	4.34715	3.5101e-28	9.31974e-27
KIAA0754	472.869	243.141	290.187	8.53188	22.1855	12.0064	335.399	14.2413	4.59254	6.21538e-28	1.62896e-26
MED12L	476.193	899.622	577.584	67.1885	70.7163	40.3852	651.133	59.43	3.45926	8.18752e-28	2.12075e-26
CNTNAP5	5447.55	2443.57	2335.45	363.671	343.876	301.252	3408.85	336.266	3.34173	2.63299e-27	6.54196e-26
-	243.498	334.319	359.944	38.3935	36.0515	34.9277	312.587	36.4576	3.09881	2.68868e-27	6.66673e-26
LOC105604616	34.0731	48.6282	53.9451	307.148	440.937	542.471	45.5488	430.185	-3.24106	3.54273e-27	8.69592e-26
ZNF483	404.722	350.275	231.592	20.2632	4.15978	17.4639	328.863	13.9623	4.51684	3.73084e-27	9.14844e-26
LOC105616740	199.452	240.102	276.236	6.39891	0	3.27447	238.597	3.22446	6.10852	3.95872e-27	9.66833e-26
SHROOM4	639.079	316.083	359.944	25.5956	40.2113	24.0128	438.369	29.9399	3.88656	7.59889e-27	1.82119e-25
LOC106991855	239.343	201.351	295.768	9.59836	6.93297	0	245.487	5.51045	5.49151	8.18243e-27	1.95337e-25
-	163.717	215.028	242.753	4.26594	9.70616	9.82342	207.166	7.93184	4.72802	1.18841e-26	2.80954e-25
LOC105605079	39.8905	31.9123	42.784	245.292	425.685	389.662	38.1956	353.546	-3.21277	1.63441e-26	3.84158e-25
-	49.0321	29.6328	44.6442	282.618	467.282	386.388	41.103	378.763	-3.20686	1.79826e-26	4.20641e-25
KSR2	242.667	196.032	170.206	11.7313	4.15978	8.73193	202.969	8.20768	4.58756	2.20091e-26	5.11391e-25
-	239.343	322.922	285.537	30.9281	11.0928	15.2809	282.601	19.1006	3.861	5.21353e-26	1.1865e-24
LOC105602398	50.6942	33.4319	40.9238	254.89	404.886	412.584	41.6833	357.453	-3.10113	3.06721e-25	6.69295e-24
LOC106991634	633.262	383.707	370.175	47.9918	45.7576	63.3065	462.381	52.352	3.13885	3.65023e-25	7.93673e-24
-	1228.29	1929.17	2037.82	200.499	58.237	88.4108	1731.76	115.716	3.89726	4.9752e-25	1.06936e-23
UNC5B	356.521	230.224	293.908	28.7951	34.6649	17.4639	293.551	26.9746	3.45755	5.40598e-25	1.15991e-23
-	251.809	229.464	268.795	23.4627	4.15978	9.82342	250.023	12.482	4.27907	4.46721e-24	9.01356e-23
LRRC32	327.434	192.233	276.236	18.1302	9.70616	25.1043	265.301	17.6469	3.88503	5.34866e-24	1.07123e-22
ZBTB16	378.129	226.425	218.571	17.0638	22.1855	26.1958	274.375	21.815	3.65488	1.0894e-23	2.13278e-22
RAPH1	2125	1675.39	2037.82	309.281	99.8348	199.743	1946.07	202.953	3.25644	1.14212e-23	2.22348e-22
DGKH	698.915	396.624	346.923	38.3935	8.31957	24.0128	480.82	23.5753	4.325	1.50094e-23	2.892e-22
LOC105615202	167.041	180.836	171.136	3.19945	2.77319	3.27447	173.005	3.08237	5.80076	2.21573e-23	4.20608e-22
TNFRSF6B	157.069	65.3442	171.136	1109.14	2824.49	1605.58	131.183	1846.41	-3.81687	2.88199e-23	5.44539e-22
ATXN7	202.777	215.788	178.577	22.3962	26.3453	22.9213	199.047	23.8876	3.06638	2.89402e-23	5.46389e-22
BSN	1170.95	830.479	621.298	86.3853	31.8917	94.9598	874.243	71.0789	3.60993	2.97038e-23	5.60372e-22
-	229.37	318.363	279.956	20.2632	9.70616	32.7447	275.896	20.9047	3.69576	3.23845e-23	6.09529e-22
LOC106991179	201.115	159.561	200.899	9.59836	18.0257	17.4639	187.192	15.0293	3.65358	4.76285e-23	8.80133e-22
PAG1	2012.81	1806.84	1436.99	270.887	83.1957	130.979	1752.21	161.687	3.43282	1.02602e-22	1.8429e-21
C1H1orf111	131.306	215.788	163.695	6.39891	4.15978	3.27447	170.263	4.61106	5.19554	2.39595e-22	4.16539e-21
LOC101110537	225.215	191.474	222.291	25.5956	20.7989	9.82342	212.993	18.7393	3.51061	2.57911e-22	4.47743e-21
FAM234B	13722.3	8696.85	10784.4	2138.3	840.277	1168.99	11067.8	1382.52	3.00035	3.89508e-22	6.67642e-21
S100A5	107.206	75.9816	70.6866	461.788	1264.57	1514.99	84.6246	1080.45	-3.67367	5.25604e-22	8.89658e-21
-	148.758	174.758	189.738	19.1967	16.6391	14.1894	171.085	16.6751	3.35736	1.29043e-21	2.12377e-20
LOC101102813	416.357	412.58	300.418	63.9891	26.3453	38.2022	376.452	42.8455	3.12066	1.8819e-21	3.03973e-20
LOC106991168	186.156	198.312	194.388	28.7951	15.2525	22.9213	192.952	22.323	3.09133	1.88335e-21	3.04005e-20
LOC105606235	167.872	142.845	174.856	5.33242	0	3.27447	161.858	2.86897	5.71822	1.95949e-21	3.15878e-20
KIRREL	271.754	193.753	283.677	27.7286	11.0928	28.3788	249.728	22.4	3.45199	2.60417e-21	4.15134e-20
LOC106991593	176.183	156.522	127.422	10.6648	8.31957	12.0064	153.376	10.3303	3.8786	2.89037e-21	4.58957e-20
-	4832.57	1780.25	2408	19802.5	32209.2	25165.4	3006.94	25725.7	-3.09684	3.06147e-21	4.84234e-20
LOC101122127	72.3015	41.0301	51.1548	305.015	696.071	639.614	54.8288	546.9	-3.31837	3.08498e-21	4.87319e-20
-	148.758	186.915	250.194	17.0638	5.54638	9.82342	195.289	10.8112	4.13987	3.98591e-21	6.25177e-20
LOC101106314	249.316	230.984	192.528	939.573	2769.03	2169.89	224.276	1959.5	-3.12629	6.01142e-21	9.25599e-20
RPS26	45.7079	36.4712	53.9451	241.026	510.267	408.218	45.3747	386.503	-3.09273	6.04805e-21	9.30064e-20
CLMN	233.526	256.058	157.185	20.2632	18.0257	26.1958	215.589	21.4949	3.31918	6.85852e-21	1.05006e-19
-	308.32	172.478	186.017	19.1967	15.2525	20.7383	222.272	18.3959	3.58545	7.00519e-21	1.07184e-19
LOC106991565	190.311	148.164	119.051	7.46539	5.54638	8.73193	152.509	7.2479	4.3778	7.34073e-21	1.12177e-19
LOC105606136	280.065	183.116	183.227	24.5292	18.0257	12.0064	215.469	18.1871	3.56428	7.83073e-21	1.19516e-19
-	184.494	176.277	238.102	1.06648	0	4.36597	199.624	1.81082	6.69144	9.91728e-21	1.50607e-19
LOC101111936	16.621	37.9908	21.392	206.898	409.045	575.216	25.3346	397.053	-3.96324	1.10763e-20	1.67685e-19
USP45	167.872	184.635	140.443	15.9973	13.8659	18.5554	164.317	16.1395	3.33984	1.1428e-20	1.72581e-19
LOC105605155	127.982	279.612	160.905	5.33242	1.38659	4.36597	189.5	3.695	5.62716	1.28189e-20	1.92869e-19
-	178.676	327.481	304.139	33.061	24.9587	30.5618	270.098	29.5272	3.18609	1.96674e-20	2.92658e-19
LOC105602216	163.717	154.243	134.863	4.26594	1.38659	2.18298	150.941	2.61184	5.80265	2.50807e-20	3.69823e-19
LOC105603073	163.717	119.291	184.157	8.53188	11.0928	12.0064	155.722	10.5437	3.88807	2.58693e-20	3.80991e-19
LOC105606135	183.662	136.767	113.471	5.33242	6.93297	4.36597	144.633	5.54379	4.72699	3.61732e-20	5.25438e-19
-	155.407	195.273	221.361	21.3297	11.0928	22.9213	190.68	18.4479	3.34548	4.5113e-20	6.51798e-19
-	179.507	130.688	139.513	7.46539	8.31957	14.1894	149.903	9.99145	3.89707	6.90347e-20	9.84006e-19
SLC38A8	259.288	455.889	257.634	34.1275	48.5308	31.6533	324.271	38.1039	3.10077	9.84917e-20	1.38926e-18
-	132.968	219.587	152.534	3.19945	5.54638	0	168.363	2.91528	5.93659	1.01492e-19	1.4291e-18
-	147.096	203.631	131.142	3.19945	6.93297	0	160.623	3.37748	5.66996	1.26641e-19	1.76242e-18
MKRN3	353.197	434.615	439.001	66.1221	22.1855	57.8491	408.938	48.7189	3.05193	1.3381e-19	1.85628e-18
LOC101107188	134.63	180.836	153.464	17.0638	9.70616	15.2809	156.31	14.0169	3.45841	1.38798e-19	1.92439e-18
SCUBE3	164.548	154.243	144.164	12.7978	5.54638	17.4639	154.318	11.936	3.65711	2.03244e-19	2.77839e-18
PLAG1	124.658	151.963	114.401	4.26594	2.77319	7.64044	130.341	4.89319	4.7015	2.51647e-19	3.40003e-18
LOC106990835	151.251	164.12	143.233	10.6648	2.77319	15.2809	152.868	9.57297	3.94928	4.70803e-19	6.21633e-18
LOC105605404	149.589	129.169	133.933	12.7978	6.93297	14.1894	137.564	11.3067	3.57701	6.93975e-19	9.03094e-18
LOC105602134	147.927	105.614	119.051	6.39891	4.15978	4.36597	124.198	4.97489	4.62537	9.56564e-19	1.23231e-17
LOC106991522	102.219	208.19	182.297	9.59836	9.70616	4.36597	164.235	7.89016	4.39402	1.21361e-18	1.55115e-17
GNGT1	9143.23	6764.64	3567.82	48506.9	34095	79507.5	6491.9	54036.5	-3.05719	1.88425e-18	2.36857e-17
MIR374B	110.53	184.635	187.878	14.9308	9.70616	15.2809	161.014	13.3059	3.57999	9.51137e-18	1.14146e-16
FREM2	747.116	542.508	695.705	20.2632	99.8348	49.1171	661.777	56.4051	3.5677	1.21703e-17	1.44139e-16
TRNAC-GCA	144.603	145.125	127.422	12.7978	18.0257	18.5554	139.05	16.4596	3.08675	1.71672e-17	2.01655e-16
LOC105607573	142.941	173.238	196.248	26.6621	12.4794	19.6468	170.809	19.5961	3.1015	2.41476e-17	2.80675e-16
C15H11orf42	216.905	160.321	155.325	24.5292	11.0928	22.9213	177.517	19.5144	3.1614	2.59331e-17	2.99997e-16
ZNF618	169.535	122.33	146.954	19.1967	15.2525	17.4639	146.273	17.3044	3.07095	3.23105e-17	3.69388e-16
AFAP1	1092.83	2245.26	2111.3	311.414	94.2885	157.175	1816.46	187.626	3.27149	4.03896e-17	4.56824e-16
IGSF22	112.192	178.557	157.185	10.6648	12.4794	2.18298	149.311	8.4424	4.17472	5.04136e-17	5.65738e-16
LOC105604781	143.772	103.335	102.31	8.53188	5.54638	4.36597	116.472	6.14807	4.23326	5.14348e-17	5.76302e-16
LOC106991509	164.548	107.134	105.1	1.06648	4.15978	6.54895	125.594	3.92507	5.01134	6.15104e-17	6.85844e-16
ABCB1	329.928	208.949	171.136	24.5292	29.1185	34.9277	236.671	29.5251	3.00346	8.31886e-17	9.19981e-16
LOC105616285	118.84	132.968	237.172	3.19945	13.8659	4.36597	162.993	7.14379	4.57656	1.16989e-16	1.27812e-15
LOC101113832	85.5983	192.233	210.2	9.59836	9.70616	8.73193	162.677	9.34549	4.12337	1.29107e-16	1.40484e-15
-	108.037	151.963	137.653	13.8643	16.6391	12.0064	132.551	14.1699	3.23726	1.57955e-16	1.70504e-15
STXBP5L	516.914	284.931	322.74	45.8588	12.4794	45.8426	374.862	34.7269	3.41345	1.96677e-16	2.09795e-15
LOC105603077	437.964	322.922	212.06	47.9918	16.6391	34.9277	324.315	33.1862	3.27235	2.04607e-16	2.17776e-15
LOC101112460	149.589	108.654	115.331	0	1.38659	5.45746	124.525	2.28135	5.74401	2.67158e-16	2.81283e-15
PAQR5	477.855	174.758	183.227	23.4627	16.6391	21.8298	278.613	20.6439	3.74693	3.12172e-16	3.27404e-15
LOC105611327	247.653	318.363	281.816	2.13297	0	0	282.611	0.71099	8.5111	6.91314e-16	7.06207e-15
LOC101110941	9.14157	30.3926	16.7416	195.167	242.654	156.083	18.7586	197.968	-3.38846	7.50535e-16	7.64781e-15
LOC105606998	155.407	126.129	218.571	23.4627	11.0928	10.9149	166.702	15.1568	3.44105	9.68031e-16	9.76606e-15
-	261.781	110.933	168.346	17.0638	5.54638	13.0979	180.353	11.9027	3.89155	1.05822e-15	1.06565e-14
-	272.585	138.286	158.115	22.3962	15.2525	22.9213	189.662	20.19	3.2198	1.28559e-15	1.28527e-14
TBX3	179.507	132.968	172.996	15.9973	29.1185	12.0064	161.824	19.0407	3.11533	1.45219e-15	1.44531e-14
LOC105608520	150.42	550.107	462.253	37.327	24.9587	33.8362	387.593	32.0406	3.59045	1.4537e-15	1.44623e-14
KCNA2	534.366	247.7	835.219	71.4545	29.1185	34.9277	539.095	45.1669	3.56869	2.15422e-15	2.1138e-14
-	111.361	120.811	91.1486	10.6648	8.31957	4.36597	107.773	7.78346	3.79487	2.28799e-15	2.24146e-14
TRPM6	508.604	240.862	314.37	59.7232	22.1855	39.2937	354.612	40.4008	3.12033	2.87622e-15	2.77753e-14
GRM7	226.046	126.889	180.437	11.7313	24.9587	6.54895	177.791	14.413	3.66197	2.90122e-15	2.79946e-14
-	83.1052	136.767	133.003	3.19945	11.0928	4.36597	117.625	6.21939	4.30252	2.97813e-15	2.87027e-14
ADAMTS12	277.571	124.61	198.109	22.3962	9.70616	22.9213	200.097	18.3412	3.42553	4.48326e-15	4.24204e-14
LOC101121199	46.5389	62.3049	40.9238	251.69	1081.54	436.597	49.9225	589.944	-3.55912	4.50111e-15	4.25728e-14
LOC105602032	186.987	92.6975	122.772	9.59836	0	4.36597	134.152	4.65478	4.77312	6.50832e-15	6.08725e-14
LOC101121082	102.219	110.933	114.401	7.46539	15.2525	5.45746	109.184	9.3918	3.58373	8.82079e-15	8.12847e-14
-	745.454	417.899	311.579	83.1858	34.6649	64.398	491.644	60.7496	3.00797	1.00329e-14	9.21065e-14
LOC106991125	211.918	190.714	125.562	13.8643	1.38659	18.5554	176.065	11.2688	3.92223	1.18484e-14	1.08162e-13
-	121.334	88.1386	111.61	4.26594	11.0928	9.82342	107.028	8.39404	3.69765	1.19911e-14	1.09424e-13
-	120.503	187.674	238.102	17.0638	4.15978	20.7383	182.093	13.9873	3.66831	1.4125e-14	1.28273e-13
LOC105605919	144.603	178.557	137.653	26.6621	8.31957	15.2809	153.604	16.7542	3.16885	1.53145e-14	1.38706e-13
LOC101118452	9.14157	8.35797	17.6717	87.4518	156.685	130.979	11.7237	125.039	-3.42864	1.601e-14	1.44582e-13
LOC105606039	260.95	207.43	193.458	20.2632	47.1442	16.3724	220.613	27.9266	3.00957	1.89211e-14	1.69552e-13
CALN1	467.882	424.737	146.954	27.7286	33.2783	43.6597	346.524	34.8888	3.31223	2.22278e-14	1.98164e-13
LOC105611150	88.0915	88.1386	82.7778	6.39891	5.54638	2.18298	86.336	4.70942	4.20814	5.26937e-14	4.57555e-13
LOC105610139	25.7626	22.7945	10.231	199.433	302.278	114.607	19.596	205.439	-3.37914	1.10647e-13	9.35127e-13
ZNF891	122.996	91.1779	84.638	9.59836	1.38659	5.45746	99.6038	5.48081	4.12567	1.12104e-13	9.47116e-13
-	207.763	113.213	154.395	15.9973	26.3453	9.82342	158.457	17.3887	3.21228	1.61988e-13	1.34708e-12
LOC105606075	277.571	172.478	139.513	13.8643	33.2783	24.0128	196.521	23.7185	3.0686	1.87668e-13	1.55216e-12
-	18.2831	3.03926	15.8115	129.045	334.169	159.358	12.378	207.524	-4.07789	1.96472e-13	1.62113e-12
NOX5	122.996	82.0601	117.191	13.8643	5.54638	5.45746	107.416	8.28938	3.66934	2.03821e-13	1.68006e-12
LOC105603685	131.306	68.3834	118.121	6.39891	0	1.09149	105.937	2.4968	5.31298	2.56377e-13	2.09696e-12
LOC105611819	101.388	117.771	199.039	14.9308	4.15978	14.1894	139.399	11.0933	3.61557	2.66263e-13	2.1749e-12
MESP2	121.334	149.684	74.407	1670.12	1044.11	386.388	115.141	1033.54	-3.16447	3.47206e-13	2.80132e-12
CRABP1	16.621	31.1524	17.6717	446.857	253.747	106.966	21.815	269.19	-3.62005	3.66158e-13	2.94643e-12
-	87.2605	106.374	79.0574	9.59836	8.31957	8.73193	90.8974	8.88329	3.35154	3.9315e-13	3.15737e-12
LOC105616503	96.402	159.561	117.191	14.9308	19.4123	9.82342	124.385	14.7222	3.0974	4.14127e-13	3.31601e-12
-	86.4294	98.0162	80.9176	9.59836	8.31957	8.73193	88.4544	8.88329	3.31171	4.16046e-13	3.33028e-12
LOC105615254	571.764	232.504	812.896	72.521	16.6391	42.5682	539.055	43.9094	3.60618	4.63009e-13	3.68924e-12
-	26.5937	8.35797	26.9725	151.441	155.299	209.566	20.6414	172.102	-3.07196	5.46962e-13	4.33691e-12
-	106.375	246.18	131.142	21.3297	15.2525	15.2809	161.232	17.2877	3.21656	6.40508e-13	5.06217e-12
-	85.5983	100.296	111.61	3.19945	13.8659	5.45746	99.1682	7.50762	3.78478	6.76159e-13	5.33183e-12
CRYGN	14.9589	6.83834	15.8115	100.25	209.376	99.3257	12.5363	136.317	-3.45012	9.0529e-13	7.06323e-12
LOC106991537	84.7673	130.688	120.911	12.7978	11.0928	17.4639	112.122	13.7848	3.01321	9.16231e-13	7.14173e-12
-	81.4431	84.3396	68.8265	4.26594	6.93297	5.45746	78.203	5.55212	3.83841	1.01144e-12	7.85624e-12
SNCG	14.1279	18.9954	14.8814	597.232	196.896	84.0449	16.0016	292.724	-4.19191	1.05849e-12	8.19558e-12
LOC101102859	9.97262	5.31871	8.37079	63.9891	102.608	86.2278	7.88737	84.275	-3.4229	1.07536e-12	8.31823e-12
LOC101112155	15.79	12.9169	13.0212	69.3215	165.005	152.809	13.9094	129.045	-3.2107	1.13859e-12	8.79062e-12
-	142.941	101.815	76.2672	7.46539	13.8659	9.82342	107.008	10.3849	3.38802	1.68677e-12	1.28199e-11
IL9	69.8084	95.7368	122.772	10.6648	2.77319	5.45746	96.1056	6.2985	3.88885	1.94862e-12	1.47182e-11
LOC101102366	67.3152	70.6629	80.9176	4.26594	2.77319	2.18298	72.9652	3.07404	4.55635	2.1087e-12	1.58585e-11
LOC106991941	65.6531	82.0601	75.3371	3.19945	2.77319	1.09149	74.3501	2.35471	4.99381	2.91869e-12	2.17554e-11
LOC105602135	136.293	64.5843	131.142	9.59836	0	3.27447	110.673	4.29095	4.61487	3.71867e-12	2.74497e-11
LOC101103156	5.81736	6.07853	13.0212	72.521	159.458	80.7704	8.3057	104.25	-3.66256	5.01949e-12	3.65167e-11
LOC105608589	6.64842	5.31871	22.3221	85.3188	262.066	177.913	11.4297	175.099	-3.95589	5.87575e-12	4.25224e-11
LOC106991735	139.617	158.042	69.7566	9.59836	15.2525	13.0979	122.472	12.6496	3.28922	6.28484e-12	4.54285e-11
LOC101120811	8.31052	12.9169	10.231	57.5902	144.206	129.887	10.4861	110.561	-3.39093	6.55028e-12	4.72776e-11
S100A3	97.2331	79.7807	35.3433	278.353	1023.31	556.661	70.7857	619.44	-3.12578	7.28811e-12	5.22933e-11
QPCT	4.98631	10.6374	6.51061	75.7204	155.299	65.4895	7.37811	98.8362	-3.72778	7.63559e-12	5.46418e-11
MKRN2OS	50.6942	91.1779	98.5893	5.33242	2.77319	4.36597	80.1538	4.15719	4.24146	9.77519e-12	6.92416e-11
LOC106991258	95.571	65.3442	80.9176	8.53188	8.31957	5.45746	80.6109	7.4363	3.44482	1.02517e-11	7.2554e-11
LOC101123148	4.15526	5.31871	5.58052	105.582	49.9174	62.215	5.01816	72.5715	-3.86029	1.33403e-11	9.32218e-11
LOC105616721	84.7673	61.5451	74.407	5.33242	1.38659	6.54895	73.5731	4.42266	4.00246	1.67574e-11	1.16241e-10
-	70.6394	104.855	145.094	11.7313	9.70616	14.1894	106.863	11.8756	3.15826	1.92811e-11	1.32944e-10
LOC105605855	106.375	133.728	211.13	4.26594	2.77319	20.7383	150.411	9.25916	3.99165	2.04112e-11	1.403e-10
-	49.8631	87.3788	80.9176	3.19945	1.38659	4.36597	72.7198	2.98401	4.5633	2.31069e-11	1.58027e-10
ADRA1A	76.4568	108.654	76.2672	11.7313	6.93297	3.27447	87.1259	7.31293	3.56864	2.51495e-11	1.71563e-10
LOC106991039	123.827	180.836	133.003	23.4627	2.77319	16.3724	145.888	14.2027	3.32433	2.83451e-11	1.92393e-10
LOC105607702	68.1463	59.2656	103.24	2.13297	4.15978	0	76.8839	2.09758	5.28372	2.92307e-11	1.98073e-10
LOC105615114	120.503	164.88	74.407	13.8643	4.15978	1.09149	119.93	6.37186	4.21056	4.06039e-11	2.72639e-10
LOC106990316	72.3015	106.374	111.61	9.59836	0	9.82342	96.7621	6.47393	3.83947	4.99094e-11	3.32284e-10
LOC105602914	73.1326	240.862	132.072	17.0638	6.93297	3.27447	148.689	9.0904	4.01839	5.23432e-11	3.47728e-10
ANKRD61	64.8221	76.7414	62.3159	1.06648	2.77319	1.09149	67.9598	1.64372	5.44114	7.26878e-11	4.7639e-10
LOC105608034	63.1599	106.374	81.8477	8.53188	1.38659	8.73193	83.794	6.2168	3.70162	8.34641e-11	5.4441e-10
-	67.3152	56.2264	65.1061	2.13297	4.15978	1.09149	62.8826	2.46142	4.73815	8.81629e-11	5.73188e-10
SLC24A2	5581.34	3036.22	3402.26	395.666	109.541	355.826	4006.61	287.011	3.80192	9.46522e-11	6.13904e-10
LOC101102683	6.64842	11.3972	6.51061	108.781	127.567	46.9341	8.18542	94.4274	-3.51408	9.68914e-11	6.27426e-10
LRRC19	68.1463	60.0254	61.3858	3.19945	0	3.27447	63.1858	2.15798	4.78179	1.01801e-10	6.57997e-10
LOC105602035	188.649	107.894	122.772	6.39891	22.1855	2.18298	139.771	10.2558	3.82315	1.02288e-10	6.60965e-10
AATK	131.306	125.37	81.8477	14.9308	2.77319	16.3724	112.841	11.3588	3.27477	1.20152e-10	7.72304e-10
SLCO1B3	19.1142	18.9954	12.0911	62.9226	230.175	182.279	16.7336	158.459	-3.23535	1.31221e-10	8.3903e-10
-	69.8084	51.6675	69.7566	3.19945	4.15978	5.45746	63.7441	4.27223	3.89789	1.39631e-10	8.91165e-10
LOC105614882	122.165	78.261	106.96	2.13297	0	0	102.462	0.71099	7.05064	1.40086e-10	8.93835e-10
LOC105606049	60.6668	98.0162	43.7141	0	0	0	67.4657	0	8.29078	1.46e-10	9.29866e-10
-	124.658	150.444	134.863	17.0638	4.15978	27.2873	136.655	16.1703	3.04807	1.52005e-10	9.67101e-10
LOC106991474	57.3426	136.007	94.8689	6.39891	8.31957	0	96.0728	4.90616	4.33449	1.57153e-10	9.98293e-10
PCDH19	135.461	66.104	79.0574	12.7978	4.15978	5.45746	93.541	7.47169	3.61648	1.83201e-10	1.15473e-09
LOC106991665	96.402	57.746	73.4769	6.39891	8.31957	8.73193	75.875	7.8168	3.28364	2.02495e-10	1.27272e-09
LOC106991520	88.0915	96.4966	99.5194	1.06648	0	0	94.7025	0.355495	7.8158	2.55513e-10	1.58712e-09
LOC105606936	113.023	60.7853	73.4769	1.06648	8.31957	0	82.4284	3.12868	4.85347	2.67408e-10	1.65763e-09
LOC101107770	0.831052	0	1.86017	71.4545	65.17	41.4767	0.897076	59.367	-6.13549	2.70882e-10	1.67831e-09
LOC105614911	78.9499	51.6675	59.5256	1.06648	4.15978	1.09149	63.381	2.10592	5.00558	2.72714e-10	1.68875e-09
LOC105602439	98.0641	60.7853	52.0849	4.26594	0	1.09149	70.3114	1.78581	5.20375	2.74174e-10	1.69655e-09
LOC105614182	89.7536	67.6236	101.38	11.7313	5.54638	1.09149	86.2522	6.12307	3.80386	2.75934e-10	1.70571e-09
-	122.165	550.866	116.261	21.3297	20.7989	5.45746	263.097	15.862	4.06027	2.78376e-10	1.71863e-09
LOC105616505	54.0184	72.9423	83.7079	1.06648	1.38659	1.09149	70.2229	1.18152	5.91052	3.48912e-10	2.13624e-09
LOC105610625	76.4568	53.1871	75.3371	5.33242	0	0	68.327	1.77747	5.16366	5.7488e-10	3.44194e-09
-	69.8084	285.691	74.407	12.7978	6.93297	8.73193	143.302	9.48758	3.90628	7.91259e-10	4.67543e-09
SLC10A1	72.3015	53.9469	96.7291	5.33242	11.0928	4.36597	74.3258	6.93038	3.46108	8.67125e-10	5.10762e-09
LOC106990827	202.777	63.0647	178.577	20.2632	5.54638	15.2809	148.139	13.6968	3.4102	9.44248e-10	5.5338e-09
GRM5	149.589	122.33	53.9451	6.39891	16.6391	8.73193	108.622	10.59	3.38941	1.01159e-09	5.91426e-09
-	96.402	159.561	134.863	17.0638	1.38659	19.6468	130.275	12.6991	3.32174	1.16175e-09	6.75325e-09
LOC105611514	0	2.27945	0.930087	30.9281	152.525	44.7512	1.06984	76.0682	-6.10758	1.17865e-09	6.84988e-09
LOC105612857	54.8494	50.9077	52.0849	2.13297	2.77319	3.27447	52.614	2.72688	4.27341	1.35495e-09	7.8204e-09
LOC105606000	90.5847	42.5497	89.2884	1.06648	4.15978	7.64044	74.1409	4.2889	4.11294	1.4552e-09	8.37322e-09
C3H2orf40	10.8037	13.6767	19.5318	105.582	863.849	500.995	14.6707	490.142	-5.06398	1.50494e-09	8.63905e-09
LOC105605563	61.4978	49.388	79.0574	0	4.15978	5.45746	63.3144	3.20575	4.333	1.59204e-09	9.11115e-09
TEX15	285.051	332.039	54.8752	8.53188	12.4794	28.3788	223.988	16.4633	3.76179	2.13633e-09	1.20982e-08
GDNF	48.201	79.0208	47.4345	4.26594	4.15978	3.27447	58.2188	3.90007	3.90643	2.22089e-09	1.2548e-08
LOC106991445	68.9773	47.8684	54.8752	4.26594	0	1.09149	57.2403	1.78581	4.90554	2.30261e-09	1.29916e-08
-	48.201	52.4273	70.6866	1.06648	1.38659	5.45746	57.105	2.63685	4.40238	2.57176e-09	1.44334e-08
-	68.1463	53.1871	42.784	4.26594	2.77319	3.27447	54.7058	3.43787	3.97616	2.79839e-09	1.56512e-08
-	72.3015	55.4666	48.3645	6.39891	1.38659	4.36597	58.7109	4.05049	3.80635	2.96634e-09	1.65564e-08
CCR9	65.6531	76.7414	37.2035	3.19945	2.77319	0	59.866	1.99088	4.94059	3.2504e-09	1.80656e-08
SEL1L2	32.411	56.9862	162.765	3.19945	2.77319	3.27447	84.0542	3.08237	4.75998	3.30815e-09	1.83758e-08
LOC105606008	73.1326	101.055	63.2459	4.26594	13.8659	2.18298	79.1447	6.77162	3.61326	3.33504e-09	1.85082e-08
LOC101114663	7.47947	4.55889	6.51061	44.7924	55.4638	66.581	6.18299	55.6124	-3.17607	3.50152e-09	1.9388e-08
LOC105602782	52.3563	91.9377	56.7353	7.46539	0	3.27447	67.0098	3.57996	4.15247	3.57641e-09	1.97758e-08
LOC105605025	46.5389	130.688	138.583	5.33242	4.15978	15.2809	105.27	8.2577	3.6503	4.48522e-09	2.46278e-08
LOC105602477	55.6805	47.8684	53.9451	1.06648	0	3.27447	52.498	1.44699	5.0942	5.60858e-09	3.0521e-08
LOC105605733	83.1052	37.9908	56.7353	2.13297	5.54638	1.09149	59.2771	2.92361	4.41376	5.7871e-09	3.14153e-08
OXT	8.31052	5.31871	2.79026	35.194	88.7421	74.2214	5.47316	66.0525	-3.57784	6.00493e-09	3.25471e-08
BFSP2	16.621	16.7159	17.6717	127.978	241.268	54.5746	17.0029	141.273	-3.05128	6.97561e-09	3.74832e-08
-	49.8631	103.335	74.407	7.46539	6.93297	12.0064	75.8684	8.80159	3.09769	7.65132e-09	4.09965e-08
LOC105607869	50.6942	57.746	50.2247	5.33242	0	3.27447	52.8883	2.86897	4.12188	7.79623e-09	4.17455e-08
-	58.1736	41.7899	47.4345	2.13297	2.77319	1.09149	49.1327	1.99922	4.65259	8.09829e-09	4.32773e-08
-	81.4431	107.894	70.6866	12.7978	0	2.18298	86.6745	4.9936	4.0555	8.23038e-09	4.38966e-08
LOC105609997	94.7399	40.2702	88.3583	0	1.38659	1.09149	74.4562	0.826029	6.57168	8.54192e-09	4.54289e-08
LOC105607782	89.7536	27.3534	72.5468	1.06648	2.77319	1.09149	63.2179	1.64372	5.32626	8.65657e-09	4.59785e-08
LOC106992038	44.0458	55.4666	109.75	7.46539	2.77319	5.45746	69.7542	5.23201	3.70292	9.7947e-09	5.17416e-08
-	52.3563	101.055	61.3858	9.59836	5.54638	1.09149	71.5992	5.41208	3.72405	1.15125e-08	6.04623e-08
LOC105614664	106.375	79.0208	43.7141	7.46539	4.15978	10.9149	76.3699	7.51336	3.32239	1.18968e-08	6.23595e-08
LOC101106609	201.946	44.8291	96.7291	9.59836	6.93297	14.1894	114.501	10.2402	3.46965	1.66764e-08	8.61716e-08
ITGA1	641.572	414.1	345.062	24.5292	2.77319	31.6533	466.911	19.6519	4.55802	1.6929e-08	8.74394e-08
NLRP13	0.831052	3.79908	4.65044	23.4627	155.299	52.3916	3.09352	77.051	-4.6408	2.05622e-08	1.05136e-07
LOC106991003	73.1326	69.9031	47.4345	5.33242	2.77319	10.9149	63.49	6.34018	3.29187	2.23602e-08	1.14018e-07
LOC106990905	89.7536	54.7067	63.2459	11.7313	2.77319	2.18298	69.2354	5.5625	3.6017	2.36641e-08	1.20365e-07
NYAP2	62.3289	47.1086	93.9388	9.59836	5.54638	8.73193	67.7921	7.95889	3.06884	2.41395e-08	1.22604e-07
-	45.7079	76.7414	52.0849	8.53188	2.77319	3.27447	58.178	4.85985	3.54979	2.49305e-08	1.26471e-07
LOC105609899	73.1326	49.388	56.7353	1.06648	0	1.09149	59.752	0.719325	6.27411	2.58304e-08	1.30702e-07
LOC106990932	24.9316	35.7113	53.9451	0	0	0	38.196	0	7.46597	2.75814e-08	1.39244e-07
-	43.2147	70.6629	40.9238	0	4.15978	1.09149	51.6005	1.75043	5.01759	2.85198e-08	1.43743e-07
LOC105613508	58.1736	34.1917	55.8052	2.13297	2.77319	0	49.3902	1.63539	4.97469	2.87669e-08	1.44899e-07
LOC106991955	44.8768	44.0693	50.2247	3.19945	2.77319	0	46.3903	1.99088	4.57037	2.8972e-08	1.45902e-07
LOC106991851	65.6531	65.3442	62.3159	4.26594	1.38659	12.0064	64.4377	5.88631	3.40828	2.90399e-08	1.46213e-07
LOC105607676	63.991	47.8684	38.1336	3.19945	0	4.36597	49.9977	2.52181	4.232	3.13255e-08	1.57169e-07
LOC105615411	34.9042	34.1917	34.4132	0	0	0	34.503	0	7.32108	3.18699e-08	1.59835e-07
LOC106990804	65.6531	56.2264	54.8752	10.6648	6.93297	4.36597	58.9182	7.32126	3.00251	3.21936e-08	1.61358e-07
LOC106991501	53.1873	41.7899	45.5743	4.26594	0	2.18298	46.8505	2.14964	4.35745	3.35564e-08	1.67913e-07
LOC105602753	81.4431	49.388	72.5468	9.59836	0	6.54895	67.7926	5.38244	3.5914	3.38961e-08	1.69543e-07
LOC101119878	5.81736	3.79908	5.58052	31.9945	59.6236	56.7576	5.06566	49.4586	-3.29203	3.94645e-08	1.95828e-07
-	34.0731	160.321	206.479	12.7978	15.2525	7.64044	133.625	11.8969	3.49843	3.95612e-08	1.96228e-07
LOC105605245	40.7215	55.4666	47.4345	2.13297	1.38659	0	47.8742	1.17319	5.36036	4.1109e-08	2.03574e-07
LOC105602357	50.6942	44.0693	39.9938	2.13297	1.38659	4.36597	44.9191	2.62851	4.05933	4.19921e-08	2.07694e-07
LOC105611959	75.6257	91.1779	81.8477	7.46539	1.38659	17.4639	82.8838	8.77195	3.20018	4.25083e-08	2.10162e-07
LOC105614702	51.5252	18.2356	47.4345	0	0	0	39.0651	0	7.49822	4.26222e-08	2.10682e-07
SCGB1C1	43.2147	44.8291	78.1273	6.39891	4.15978	5.45746	55.3904	5.33872	3.35655	5.14956e-08	2.52089e-07
-	185.325	274.293	50.2247	24.5292	8.31957	19.6468	169.948	17.4985	3.26611	5.22516e-08	2.55585e-07
LOC105616775	39.0594	50.1478	44.6442	0	2.77319	2.18298	44.6172	1.65206	4.82718	5.57208e-08	2.71628e-07
SMPD5	39.0594	57.746	52.0849	6.39891	4.15978	2.18298	49.6301	4.24723	3.54191	5.89278e-08	2.86631e-07
UPP2	71.4705	37.9908	50.2247	4.26594	6.93297	4.36597	53.2287	5.18829	3.38206	6.57648e-08	3.18109e-07
-	47.37	82.0601	57.6654	8.53188	4.15978	0	62.3652	4.23055	3.87552	7.41127e-08	3.56367e-07
-	41.5526	52.4273	114.401	6.39891	2.77319	8.73193	69.4602	5.96801	3.5084	7.94836e-08	3.81065e-07
-	63.991	104.095	132.072	17.0638	0	7.64044	100.053	8.23473	3.55689	8.76231e-08	4.18441e-07
-	585.892	112.453	72.5468	4.26594	8.31957	5.45746	256.964	6.01432	5.42844	9.32517e-08	4.43842e-07
LOC105602344	49.0321	49.388	33.4831	4.26594	1.38659	1.09149	43.9677	2.24801	4.25332	9.66098e-08	4.59108e-07
LOC101103150	2.49316	6.07853	4.65044	37.327	37.4381	64.398	4.40737	46.3877	-3.39153	9.87198e-08	4.68861e-07
LOC105615397	61.4978	91.9377	41.8539	6.39891	1.38659	9.82342	65.0965	5.86964	3.42998	1.00057e-07	4.74751e-07
-	40.7215	44.8291	59.5256	0	0	1.09149	48.3588	0.363831	6.84501	1.09566e-07	5.1741e-07
KCNH1	54.0184	30.3926	42.784	2.13297	1.38659	2.18298	42.3983	1.90085	4.45441	1.14154e-07	5.38283e-07
LOC105604031	27.4247	31.9123	30.6929	0	0	0	30.01	0	7.11993	1.20489e-07	5.66473e-07
MIR125B	38.2284	25.8337	27.9026	0	0	0	30.6549	0	7.15037	1.20716e-07	5.67359e-07
LOC106991617	63.1599	56.9862	39.0637	3.19945	4.15978	8.73193	53.0699	5.36372	3.2962	1.22215e-07	5.73965e-07
LOC106991661	44.8768	47.1086	47.4345	1.06648	0	0	46.4733	0.355495	6.78892	1.23533e-07	5.79927e-07
LOC101109556	4.15526	3.79908	0.930087	24.5292	49.9174	60.032	2.96148	44.8262	-3.89192	1.24158e-07	5.82527e-07
BPIFB6	12.4658	24.3141	14.8814	41.5929	212.149	172.456	17.2204	142.066	-3.03721	1.32588e-07	6.20767e-07
LOC105602103	46.5389	40.2702	40.9238	0	2.77319	1.09149	42.5777	1.28823	5.16849	1.47187e-07	6.84512e-07
LOC106991468	73.1326	83.5797	287.397	24.5292	8.31957	4.36597	148.036	12.4049	3.56331	1.49118e-07	6.92437e-07
LOC106991478	49.8631	31.9123	67.8964	5.33242	0	1.09149	49.8906	2.14131	4.45534	1.53214e-07	7.1051e-07
-	50.6942	57.746	28.8327	2.13297	1.38659	0	45.7576	1.17319	5.29663	1.5464e-07	7.16582e-07
LOC105612044	34.0731	41.7899	62.3159	4.26594	1.38659	0	46.0596	1.88418	4.57829	1.57502e-07	7.28867e-07
LOC106991875	75.6257	28.1132	68.8265	0	0	2.18298	57.5218	0.727661	6.2203	1.59278e-07	7.3625e-07
LOC105602685	48.201	28.873	19.5318	0	0	0	32.2019	0	7.22274	1.59341e-07	7.36402e-07
LOC105615880	33.2421	27.3534	26.9725	0	0	0	29.1893	0	7.07996	1.61464e-07	7.45221e-07
-	144.603	27.3534	39.0637	2.13297	5.54638	1.09149	70.34	2.92361	4.64697	1.63496e-07	7.54033e-07
CCBE1	119.671	41.7899	41.8539	3.19945	8.31957	5.45746	67.7718	5.65883	3.61086	1.64447e-07	7.58273e-07
LOC105611247	54.0184	24.3141	84.638	0	0	1.09149	54.3235	0.363831	7.01136	1.65042e-07	7.60874e-07
TRNAC-ACA	47.37	51.6675	44.6442	6.39891	0	4.36597	47.8939	3.58829	3.66503	1.66375e-07	7.66728e-07
LOC106991444	5.81736	3.79908	5.58052	31.9945	61.0102	42.5682	5.06566	45.191	-3.15931	2.06591e-07	9.4191e-07
-	45.7079	45.5889	53.015	2.13297	5.54638	7.64044	48.1039	5.1066	3.24468	2.22972e-07	1.01356e-06
REL	74.7947	37.231	48.3645	1.06648	8.31957	3.27447	53.4634	4.22018	3.73214	2.2727e-07	1.03194e-06
LOC105608895	34.9042	53.9469	40.9238	2.13297	1.38659	5.45746	43.2583	2.99234	3.81736	2.57575e-07	1.16326e-06
LOC105605633	46.5389	50.1478	42.784	0	2.77319	0	46.4903	0.924397	5.87532	2.57696e-07	1.16339e-06
TAC3	4.98631	8.35797	10.231	262.355	77.6493	20.7383	7.85842	120.248	-3.94027	2.60805e-07	1.17698e-06
LOC105608624	59.8357	41.7899	39.0637	1.06648	0	1.09149	46.8964	0.719325	5.92735	2.63736e-07	1.18933e-06
LOC106991587	27.4247	22.0347	35.3433	0	0	0	28.2676	0	7.0316	2.64554e-07	1.19279e-06
LOC106991716	27.4247	32.6721	23.2522	0	0	0	27.783	0	7.00997	2.69869e-07	1.21518e-06
LOC105606082	37.3973	47.1086	57.6654	7.46539	2.77319	2.18298	47.3904	4.14052	3.48784	2.73783e-07	1.23167e-06
LOC105613198	43.2147	59.2656	32.5531	3.19945	1.38659	5.45746	45.0111	3.34784	3.71026	2.75013e-07	1.23652e-06
LOC101119090	7.47947	6.07853	1.86017	34.1275	54.0772	56.7576	5.13939	48.3208	-3.21159	2.77131e-07	1.24581e-06
LOC105603578	27.4247	60.0254	39.0637	2.13297	2.77319	2.18298	42.1713	2.36305	4.17387	2.78367e-07	1.25114e-06
-	32.411	142.086	60.4557	8.53188	5.54638	7.64044	78.3174	7.23957	3.42562	2.89044e-07	1.29554e-06
-	37.3973	65.3442	73.4769	7.46539	0	0	58.7395	2.48846	4.48321	2.90378e-07	1.30104e-06
-	58.1736	22.0347	56.7353	3.19945	1.38659	2.18298	45.6479	2.25634	4.30382	2.94536e-07	1.31871e-06
LOC105614969	40.7215	58.5058	33.4831	3.19945	0	0	44.2368	1.06648	5.27136	2.97021e-07	1.32958e-06
LOC101112481	21.6074	29.6328	31.623	0	0	0	27.621	0	6.99971	3.003e-07	1.34303e-06
UNC5D	201.946	90.4181	70.6866	2.13297	8.31957	22.9213	121.017	11.1246	3.43784	3.13416e-07	1.39861e-06
LOC105608857	44.8768	47.1086	54.8752	6.39891	0	0	48.9535	2.13297	4.43385	3.19831e-07	1.42515e-06
-	15.79	33.4319	39.9938	0	0	0	29.7385	0	7.10572	3.3202e-07	1.47515e-06
-	54.8494	57.746	50.2247	4.26594	11.0928	1.09149	54.2734	5.4834	3.37284	3.43056e-07	1.52168e-06
-	67.3152	31.9123	62.3159	5.33242	8.31957	4.36597	53.8478	6.00599	3.18666	3.43467e-07	1.52323e-06
LOC101121256	38.2284	37.9908	40.9238	0	1.38659	3.27447	39.0477	1.55369	4.65082	3.44362e-07	1.52664e-06
-	39.0594	32.6721	48.3645	2.13297	1.38659	4.36597	40.032	2.62851	3.89203	3.59247e-07	1.58916e-06
LOC105602693	38.2284	34.9515	50.2247	1.06648	0	0	41.1349	0.355495	6.61132	3.96078e-07	1.74449e-06
LOC105615544	50.6942	25.8337	54.8752	1.06648	0	0	43.801	0.355495	6.70132	4.01053e-07	1.76545e-06
LOC101110239	35.7352	24.3141	21.392	0	0	0	27.1471	0	6.97579	4.05713e-07	1.78434e-06
LOC105615152	36.5663	38.7506	38.1336	3.19945	0	1.09149	37.8168	1.43032	4.62928	4.54146e-07	1.98803e-06
LOC101109336	4.98631	8.35797	2.79026	71.4545	63.7834	26.1958	5.37818	53.8112	-3.30081	4.92542e-07	2.14724e-06
-	76.4568	47.8684	53.015	12.7978	4.15978	3.27447	59.1134	6.74403	3.10588	5.41211e-07	2.35268e-06
LOC106991342	110.53	47.1086	30.6929	7.46539	5.54638	4.36597	62.7771	5.79258	3.43522	6.31091e-07	2.72517e-06
LOC105604169	45.7079	41.7899	42.784	3.19945	0	6.54895	43.4272	3.24947	3.67156	6.31147e-07	2.72517e-06
LOC101118607	8.31052	3.03926	4.65044	26.6621	66.5566	57.8491	5.33341	50.3559	-3.2396	6.4852e-07	2.79474e-06
LOC105603555	35.7352	45.5889	60.4557	7.46539	5.54638	3.27447	47.26	5.42875	3.11929	6.58032e-07	2.83222e-06
LOC106991723	45.7079	47.8684	30.6929	4.26594	0	0	41.423	1.42198	4.76924	7.09773e-07	3.04524e-06
LOC101119481	34.9042	25.0739	17.6717	0	0	0	25.8833	0	6.90768	7.20409e-07	3.08761e-06
LOC106990872	52.3563	32.6721	30.6929	2.13297	0	1.09149	38.5737	1.07482	5.06943	7.32644e-07	3.13674e-06
LOC106991313	48.201	25.0739	44.6442	3.19945	0	1.09149	39.3064	1.43032	4.68659	7.63968e-07	3.2634e-06
LOC106990813	45.7079	24.3141	49.2946	1.06648	0	0	39.7722	0.355495	6.56213	7.8181e-07	3.33494e-06
GDA	44.8768	45.5889	32.5531	5.33242	2.77319	4.36597	41.0063	4.15719	3.27868	7.93591e-07	3.38342e-06
-	46.5389	69.9031	53.9451	8.53188	0	0	56.7957	2.84396	4.24802	8.15455e-07	3.47177e-06
LOC101123026	78.1189	129.169	39.9938	10.6648	4.15978	15.2809	82.4271	10.0352	3.0161	8.18829e-07	3.48553e-06
SPATC1	74.7947	92.6975	73.4769	17.0638	0	4.36597	80.323	7.14324	3.44332	8.24697e-07	3.50683e-06
LOC105603693	27.4247	40.2702	44.6442	3.19945	0	2.18298	37.4464	1.79415	4.2972	8.67705e-07	3.67944e-06
LOC106991997	31.58	69.1432	59.5256	9.59836	4.15978	3.27447	53.4163	5.67754	3.21511	9.47173e-07	3.99764e-06
LOC105611334	29.9179	49.388	41.8539	1.06648	0	1.09149	40.3866	0.719325	5.7133	1.01525e-06	4.26504e-06
SCN4B	22.4384	105.614	69.7566	5.33242	5.54638	7.64044	65.9365	6.17308	3.41364	1.04478e-06	4.38381e-06
LOC105603240	53.1873	32.6721	32.5531	4.26594	2.77319	3.27447	39.4708	3.43787	3.50587	1.05045e-06	4.40607e-06
LOC105611202	82.2741	61.5451	33.4831	9.59836	0	3.27447	59.1008	4.29095	3.72425	1.05399e-06	4.42014e-06
TTR	1666.26	7686.3	3814.29	18373.4	244875	99127.1	4388.95	120792	-4.78249	1.07878e-06	4.52101e-06
-	5.81736	6.83834	4.65044	33.061	87.3555	33.8362	5.76871	51.4176	-3.14008	1.08892e-06	4.55957e-06
LOC101107984	4.15526	6.83834	0.930087	107.715	47.1442	21.8298	3.97456	58.8963	-3.86389	1.09316e-06	4.57654e-06
LOC105605416	37.3973	34.1917	34.4132	0	0	1.09149	35.3341	0.363831	6.39365	1.11516e-06	4.66544e-06
LOC101108797	4.15526	6.83834	5.58052	207.965	103.995	6.54895	5.52471	106.169	-4.26232	1.13349e-06	4.73482e-06
-	32.411	61.5451	65.1061	3.19945	5.54638	9.82342	53.0207	6.18975	3.09485	1.17162e-06	4.88822e-06
LOC101114261	0	12.1571	1.86017	50.1248	108.154	70.947	4.67241	76.4087	-3.99874	1.22428e-06	5.09661e-06
LOC106991546	41.5526	28.1132	37.2035	1.06648	0	0	35.6231	0.355495	6.40441	1.22775e-06	5.11015e-06
UTS2	50.6942	97.2564	17.6717	4.26594	4.15978	1.09149	55.2074	3.17241	4.14122	1.24356e-06	5.17246e-06
-	4.15526	13.6767	6.51061	23.4627	199.67	75.3129	8.11419	99.4817	-3.60243	1.2723e-06	5.28566e-06
COL4A3	58.1736	86.619	33.4831	4.26594	6.93297	10.9149	59.4253	7.37128	3.01304	1.31225e-06	5.44235e-06
RXFP3	354.859	49.388	97.6592	19.1967	9.70616	25.1043	167.302	18.0024	3.20581	1.35658e-06	5.61952e-06
LOC105602718	24.9316	24.3141	19.5318	0	0	0	22.9258	0	6.73229	1.38685e-06	5.73905e-06
LOC101105258	43.2147	53.9469	45.5743	1.06648	9.70616	1.09149	47.5786	3.95471	3.68873	1.59548e-06	6.54575e-06
TRNAS-GGA	38.2284	38.7506	29.7628	3.19945	0	3.27447	35.5806	2.15798	3.96458	1.63119e-06	6.68324e-06
LOC105607674	44.8768	34.9515	36.2734	5.33242	4.15978	1.09149	38.7006	3.5279	3.46454	1.67255e-06	6.84464e-06
COL4A4	100.557	50.1478	37.2035	1.06648	4.15978	10.9149	62.6362	5.3804	3.53428	1.70556e-06	6.97156e-06
NRN1	4.15526	10.6374	11.161	171.704	38.8247	43.6597	8.65124	84.7295	-3.29699	1.71249e-06	6.99637e-06
LOC105609624	43.2147	22.7945	60.4557	1.06648	5.54638	1.09149	42.155	2.56812	4.12396	1.76719e-06	7.21378e-06
-	0.831052	1.51963	0	63.9891	79.0359	4.36597	0.783561	49.1303	-5.90848	1.77232e-06	7.2335e-06
PKHD1	217.736	22.0347	8.37079	1.06648	0	1.09149	82.7137	0.719325	6.76563	1.80677e-06	7.3618e-06
LOC106990469	27.4247	37.9908	36.2734	3.19945	1.38659	2.18298	33.8963	2.25634	3.87549	1.8281e-06	7.44247e-06
LOC101115734	22.4384	22.7945	20.4619	0	0	0	21.8983	0	6.66566	1.94503e-06	7.89874e-06
LOC105615937	21.6074	28.873	16.7416	0	0	0	22.4073	0	6.70048	2.08859e-06	8.45356e-06
LOC105615742	49.8631	34.1917	29.7628	2.13297	0	0	37.9392	0.71099	5.62743	2.33284e-06	9.36903e-06
LOC105611192	21.6074	14.4365	32.5531	0	0	0	22.8656	0	6.72459	2.44261e-06	9.76963e-06
LOC105616534	29.0868	37.231	28.8327	0	0	1.09149	31.7168	0.363831	6.23895	2.7449e-06	1.09142e-05
EPHA8	26.5937	132.208	180.437	20.2632	8.31957	6.54895	113.08	11.7106	3.26026	2.74937e-06	1.09302e-05
GRIN1	1040.48	937.613	80.9176	38.3935	18.0257	28.3788	686.336	28.266	4.59916	2.9242e-06	1.15969e-05
XKR7	49.8631	63.8245	65.1061	11.7313	0	1.09149	59.5979	4.27427	3.74214	2.95476e-06	1.17143e-05
LOC106991150	51.5252	29.6328	40.9238	4.26594	1.38659	6.54895	40.694	4.06716	3.27884	3.24964e-06	1.28063e-05
LOC105615740	17.4521	18.9954	26.0424	0	0	0	20.83	0	6.59153	3.48487e-06	1.36868e-05
GLRA1	26.5937	27.3534	120.911	3.19945	4.15978	5.45746	58.2861	4.27223	3.76655	3.80306e-06	1.48551e-05
-	22.4384	33.4319	37.2035	1.06648	0	0	31.0246	0.355495	6.2053	3.8361e-06	1.49818e-05
-	29.9179	38.7506	49.2946	6.39891	4.15978	3.27447	39.321	4.61106	3.08163	3.88227e-06	1.51499e-05
LOC105614972	19.1142	20.515	20.4619	0	0	0	20.0304	0	6.53654	4.10579e-06	1.5994e-05
LOC105604082	37.3973	26.5936	38.1336	1.06648	2.77319	4.36597	34.0415	2.73521	3.64162	4.17081e-06	1.6224e-05
LOC105615441	41.5526	24.3141	26.0424	0	0	1.09149	30.6364	0.363831	6.18782	4.52692e-06	1.7517e-05
LOC105610397	2.49316	4.55889	4.65044	26.6621	29.1185	46.9341	3.90083	34.2383	-3.13747	4.56586e-06	1.76564e-05
LOC105612692	22.4384	25.8337	44.6442	0	1.38659	0	30.9721	0.462198	6.20102	4.90604e-06	1.8888e-05
ND3	251.809	353.314	186.017	4444.04	672.499	5051.42	263.714	3389.32	-3.68382	5.39384e-06	2.06453e-05
LOC105602927	30.7489	42.5497	26.0424	3.19945	0	0	33.1137	1.06648	4.85766	5.69138e-06	2.16956e-05
-	55.6805	44.0693	30.6929	7.46539	0	4.36597	43.4809	3.94379	3.39951	5.76448e-06	2.19502e-05
LOC105609467	10.8037	7.59816	75.3371	0	0	0	31.2463	0	7.17443	6.00014e-06	2.28155e-05
LOC105615255	23.2695	25.8337	45.5743	1.06648	2.77319	1.09149	31.5592	1.64372	4.32076	6.05017e-06	2.29986e-05
LOC105603797	24.9316	22.0347	42.784	0	0	1.09149	29.9167	0.363831	6.1507	6.1692e-06	2.34182e-05
LOC105602467	34.0731	25.8337	39.9938	2.13297	0	0	33.3002	0.71099	5.43785	6.1891e-06	2.349e-05
LOC101102326	27.4247	24.3141	40.9238	2.13297	0	2.18298	30.8876	1.43865	4.33708	6.39309e-06	2.41814e-05
LOC105616648	39.0594	34.1917	22.3221	2.13297	0	3.27447	31.8577	1.80248	4.06766	6.98135e-06	2.62396e-05
LOC101112274	10.8037	1.51963	13.0212	34.1275	95.675	81.8619	8.44818	70.5548	-3.07644	7.12621e-06	2.6751e-05
LOC105603522	34.9042	24.3141	29.7628	1.06648	0	2.18298	29.6604	1.08316	4.68873	7.31105e-06	2.74069e-05
TRNAG-UCC	29.0868	29.6328	31.623	3.19945	1.38659	0	30.1142	1.52868	4.28279	7.45808e-06	2.79323e-05
LOC105604986	39.8905	15.9561	34.4132	0	1.38659	0	30.0866	0.462198	6.15967	7.58832e-06	2.8407e-05
-	0	0	3.72035	49.0583	41.5978	14.1894	1.24012	34.9485	-4.90775	7.95995e-06	2.97433e-05
LOC105605724	36.5663	35.7113	26.9725	4.26594	0	0	33.0834	1.42198	4.44829	8.27639e-06	3.08737e-05
LOC105607669	24.9316	31.9123	37.2035	3.19945	0	0	31.3491	1.06648	4.77629	8.60686e-06	3.20329e-05
GPX2	0.831052	1.51963	1.86017	19.1967	24.9587	27.2873	1.40362	23.8142	-4.09274	8.76794e-06	3.26075e-05
-	31.58	46.3488	51.1548	0	4.15978	7.64044	43.0278	3.93341	3.46017	8.99674e-06	3.34278e-05
LOC106991524	27.4247	29.6328	23.2522	1.06648	0	0	26.7699	0.355495	5.9943	9.32587e-06	3.46138e-05
LOC105615664	24.9316	31.1524	24.1823	0	1.38659	0	26.7554	0.462198	5.99355	9.43547e-06	3.50046e-05
LOC106991435	33.2421	21.2748	39.0637	3.19945	0	2.18298	31.1935	1.79415	4.03595	9.74904e-06	3.60691e-05
LOC101105437	30.7489	12.9169	62.3159	2934.97	963.683	128.796	35.3272	1342.48	-5.24962	9.836e-06	3.63577e-05
LOC101108414	1.6621	1.51963	6.51061	78.9199	34.6649	16.3724	3.23078	43.319	-3.77953	1.00596e-05	3.71446e-05
C13H10orf113	32.411	23.5543	34.4132	0	1.38659	1.09149	30.1262	0.826029	5.26288	1.02139e-05	3.76745e-05
LOC105604399	42.3836	17.4758	42.784	2.13297	0	0	34.2145	0.71099	5.47992	1.02216e-05	3.76973e-05
TTN	82.2741	31.9123	35.3433	8.53188	6.93297	3.27447	49.8432	6.24644	3.00028	1.05387e-05	3.8814e-05
LOC105610742	17.4521	37.9908	27.9026	0	0	1.09149	27.7818	0.363831	6.04791	1.0806e-05	3.97265e-05
LOC101114083	4.15526	1.51963	1.86017	23.4627	34.6649	25.1043	2.51169	27.7439	-3.4628	1.08245e-05	3.97884e-05
LOC105616154	28.2558	28.1132	38.1336	2.13297	0	4.36597	31.5008	2.16631	3.78794	1.10428e-05	4.05662e-05
LOC106991906	12.4658	15.9561	28.8327	0	0	0	19.0849	0	6.46411	1.10894e-05	4.0719e-05
LOC105602133	34.0731	21.2748	39.9938	2.13297	0	0	31.7806	0.71099	5.37179	1.12656e-05	4.13164e-05
LOC105610181	39.0594	40.2702	23.2522	5.33242	2.77319	1.09149	34.194	3.0657	3.47016	1.13637e-05	4.16446e-05
-	28.2558	25.8337	32.5531	3.19945	0	1.09149	28.8809	1.43032	4.24437	1.14278e-05	4.18567e-05
LOC106990402	24.9316	34.9515	40.9238	3.19945	5.54638	2.18298	33.6023	3.64294	3.24151	1.14685e-05	4.19908e-05
LOC105606007	54.0184	69.1432	3.72035	0	0	1.09149	42.294	0.363831	6.65532	1.15315e-05	4.21834e-05
LOC105608452	23.2695	15.9561	14.8814	0	0	0	18.0357	0	6.38565	1.16569e-05	4.2604e-05
IGFBP2	86.4294	155.002	80.9176	325.278	2683.06	1086.03	107.45	1364.79	-3.66624	1.18595e-05	4.32858e-05
LOC105610224	26.5937	16.7159	39.9938	0	1.38659	0	27.7678	0.462198	6.04279	1.21212e-05	4.41817e-05
THSD4	157.9	59.2656	82.7778	4.26594	27.7319	3.27447	99.9811	11.7574	3.12972	1.22083e-05	4.44592e-05
-	13.2968	0.759816	11.161	17.0638	135.886	176.822	8.4059	109.924	-3.71812	1.23683e-05	4.5015e-05
SAMD7	48.201	28.873	25.1124	5.33242	1.38659	2.18298	34.0621	2.96733	3.48052	1.33203e-05	4.83282e-05
LOC105612273	38.2284	28.1132	29.7628	2.13297	4.15978	4.36597	32.0348	3.55291	3.18729	1.33255e-05	4.83398e-05
LOC106990887	17.4521	9.8776	30.6929	0	0	0	19.3409	0	6.48231	1.37745e-05	4.9902e-05
LOC101102982	9.97262	6.83834	8.37079	191.967	58.237	14.1894	8.39392	88.1312	-3.39558	1.40578e-05	5.08374e-05
LOC106991667	44.8768	17.4758	21.392	1.06648	0	0	27.9149	0.355495	6.05345	1.42962e-05	5.1646e-05
HPD	5.81736	5.31871	0.930087	24.5292	52.6906	33.8362	4.02205	37.0187	-3.17254	1.45272e-05	5.24337e-05
LOC101115808	37.3973	27.3534	48.3645	2.13297	8.31957	2.18298	37.7051	4.21184	3.22528	1.46671e-05	5.2923e-05
-	2.49316	0	3.72035	50.1248	44.371	12.0064	2.07117	35.5007	-4.14035	1.47559e-05	5.32199e-05
LOC105616095	18.2831	12.9169	21.392	0	0	0	17.5307	0	6.34229	1.48086e-05	5.33863e-05
-	23.2695	130.688	37.2035	6.39891	8.31957	5.45746	63.7204	6.72531	3.25689	1.52533e-05	5.4876e-05
LOC101111417	31.58	24.3141	28.8327	1.06648	1.38659	0	28.2423	0.817693	5.17315	1.54834e-05	5.56283e-05
FLT4	43.2147	25.8337	40.9238	6.39891	1.38659	0	36.6574	2.59517	3.77946	1.67181e-05	5.97927e-05
LOC105611599	21.6074	12.9169	16.7416	0	0	0	17.0886	0	6.30666	1.81131e-05	6.45261e-05
LOC101123612	63.1599	28.1132	20.4619	5.33242	1.38659	1.09149	37.245	2.6035	3.80311	1.84332e-05	6.55803e-05
-	15.79	44.8291	33.4831	1.06648	0	3.27447	31.3674	1.44699	4.36571	1.86197e-05	6.6186e-05
TAC1	4.98631	12.1571	6.51061	1073.95	124.794	30.5618	7.88466	409.769	-5.69728	1.87245e-05	6.65035e-05
LOC105615611	24.1005	6.07853	30.6929	0	0	0	20.2906	0	6.55182	1.90394e-05	6.75793e-05
-	25.7626	10.6374	16.7416	0	0	0	17.7139	0	6.35823	1.94454e-05	6.89299e-05
LOC105603670	13.2968	18.2356	18.6017	0	0	0	16.7114	0	6.27498	1.96086e-05	6.94479e-05
AIM1L	10.8037	4.55889	7.4407	14.9308	221.855	40.3852	7.60109	92.3904	-3.60164	1.99354e-05	7.0554e-05
FANCB	38.2284	28.873	30.6929	5.33242	1.38659	4.36597	32.5981	3.695	3.09674	2.01817e-05	7.13324e-05
PRSS12	2.49316	17.4758	8.37079	22.3962	219.082	67.6725	9.44657	103.05	-3.43636	2.07059e-05	7.30688e-05
LOC106991712	29.9179	22.7945	32.5531	2.13297	0	0	28.4218	0.71099	5.21146	2.07147e-05	7.30892e-05
LOC105615566	26.5937	28.1132	26.0424	1.06648	0	1.09149	26.9164	0.719325	5.13039	2.08297e-05	7.34737e-05
LOC105602292	20.7763	9.8776	21.392	0	0	0	17.3486	0	6.32679	2.16442e-05	7.60714e-05
LOC106990374	34.9042	37.231	42.784	0	8.31957	1.09149	38.3064	3.13702	3.72242	2.20677e-05	7.74594e-05
-	21.6074	21.2748	9.30087	0	0	0	17.3944	0	6.33567	2.26857e-05	7.94142e-05
LOC105614425	24.1005	7.59816	23.2522	0	0	0	18.3169	0	6.40487	2.30117e-05	8.04485e-05
LOC105616910	19.9452	15.1963	13.9513	0	0	0	16.3643	0	6.24538	2.31481e-05	8.08907e-05
LOC106990338	17.4521	11.3972	21.392	0	0	0	16.7471	0	6.27591	2.31878e-05	8.10178e-05
LOC106991377	25.7626	13.6767	12.0911	0	0	0	17.1768	0	6.31547	2.32937e-05	8.13645e-05
LOC105614804	24.9316	11.3972	14.8814	0	0	0	17.0701	0	6.30533	2.37893e-05	8.30123e-05
-	23.2695	26.5936	37.2035	0	2.77319	3.27447	29.0222	2.01589	3.88238	2.39058e-05	8.33949e-05
ARNTL2	170.366	6.07853	38.1336	4.26594	4.15978	3.27447	71.5259	3.90007	4.19904	2.4219e-05	8.44271e-05
LOC101111701	2.49316	1.51963	1.86017	11.7313	36.0515	31.6533	1.95765	26.4787	-3.75581	2.43536e-05	8.48114e-05
OMP	13.2968	25.8337	12.0911	0	0	0	17.0739	0	6.30905	2.47373e-05	8.60615e-05
GRIN2B	41.5526	21.2748	36.2734	5.33242	0	2.18298	33.0336	2.50514	3.64618	2.50653e-05	8.71404e-05
LOC101122710	22.4384	41.7899	44.6442	4.26594	1.38659	6.54895	36.2908	4.06716	3.11675	2.51961e-05	8.75703e-05
LOC101115828	0	1.51963	0.930087	24.5292	102.608	2.18298	0.816573	43.1067	-5.69994	2.52604e-05	8.77686e-05
LOC101106136	18.2831	11.3972	19.5318	0	0	0	16.4041	0	6.24648	2.58479e-05	8.97076e-05
LOC105612526	21.6074	15.1963	12.0911	0	0	0	16.2983	0	6.24006	2.73829e-05	9.46041e-05
LOC105610517	24.9316	17.4758	26.9725	1.06648	0	0	23.1266	0.355495	5.78035	2.9163e-05	0.00010037
LOC105610493	31.58	28.1132	18.6017	0	1.38659	2.18298	26.0983	1.18986	4.47991	3.05809e-05	0.000104835
LOC105605175	27.4247	25.0739	27.9026	0	2.77319	0	26.8004	0.924397	5.06319	3.12788e-05	0.000107077
LOC105602836	25.7626	23.5543	28.8327	1.06648	0	3.27447	26.0499	1.44699	4.09268	3.29736e-05	0.000112452
-	38.2284	28.1132	26.0424	1.06648	0	5.45746	30.7947	2.17465	3.75931	3.36944e-05	0.00011467
LOC101122587	35.7352	45.5889	13.9513	0	4.15978	1.09149	31.7585	1.75043	4.29638	3.40307e-05	0.000115734
LOC105615651	15.79	18.9954	12.0911	0	0	0	15.6255	0	6.18011	3.41614e-05	0.000116162
FAXDC2	21.6074	21.2748	35.3433	1.06648	0	1.09149	26.0752	0.719325	5.08349	3.55516e-05	0.000120553
LOC105611702	24.9316	6.83834	20.4619	0	0	0	17.4106	0	6.33199	3.64435e-05	0.00012344
LOC105602171	34.0731	35.7113	34.4132	7.46539	0	3.27447	34.7326	3.57996	3.21193	3.77071e-05	0.000127543
DAND5	9.14157	50.9077	22.3221	1.06648	0	0	27.4571	0.355495	6.03223	3.80661e-05	0.000128721
LOC101117946	0	0	0	6.39891	22.1855	14.1894	0	14.2579	-6.52526	3.80763e-05	0.000128738
ZG16	74.7947	12.9169	59.5256	5.33242	5.54638	0	49.079	3.62627	3.78129	3.87055e-05	0.000130756
LOC105615084	36.5663	22.0347	24.1823	2.13297	4.15978	1.09149	27.5944	2.46142	3.53888	4.00424e-05	0.000134899
LOC105611933	9.97262	31.9123	32.5531	0	0	1.09149	24.8126	0.363831	5.88325	4.00821e-05	0.000135014
LOC106991543	31.58	27.3534	40.9238	0	6.93297	2.18298	33.2857	3.03865	3.54341	4.07816e-05	0.000137181
LOC101112335	22.4384	26.5936	16.7416	1.06648	0	0	21.9245	0.355495	5.70714	4.16304e-05	0.000139824
LOC105614717	19.9452	12.9169	13.0212	0	0	0	15.2944	0	6.14754	4.17164e-05	0.000140054
ABCC11	14.1279	12.1571	19.5318	0	0	0	15.2723	0	6.14324	4.18204e-05	0.000140365
LOC105604422	50.6942	38.7506	12.0911	4.26594	0	1.09149	33.8453	1.78581	4.1716	4.25484e-05	0.00014271
LOC105616563	32.411	17.4758	17.6717	1.06648	0	0	22.5195	0.355495	5.744	4.28389e-05	0.000143625
FRK	0	1.51963	5.58052	24.5292	23.5721	43.6597	2.36672	30.587	-3.7371	4.45875e-05	0.000149037
LOC105611957	30.7489	16.7159	26.9725	2.13297	0	1.09149	24.8125	1.07482	4.43687	4.83595e-05	0.000160917
LOC105602754	30.7489	25.8337	17.6717	2.13297	0	2.18298	24.7514	1.43865	4.02521	5.58981e-05	0.000184291
-	32.411	32.6721	28.8327	0	5.54638	4.36597	31.3053	3.30412	3.29536	5.71987e-05	0.0001884
LOC106991870	78.9499	50.1478	17.6717	6.39891	6.93297	0	48.9231	4.44396	3.48655	5.75446e-05	0.000189386
LOC105602708	34.0731	25.8337	18.6017	3.19945	0	0	26.1695	1.06648	4.52278	5.82703e-05	0.000191516
LOC105606874	15.79	11.3972	14.8814	0	0	0	14.0229	0	6.02118	7.24545e-05	0.000235349
LOC105603621	56.5115	39.5104	43.7141	2.13297	12.4794	0	46.5787	4.87077	3.33531	7.26211e-05	0.00023582
LOC105605039	19.1142	9.8776	13.9513	0	0	0	14.3144	0	6.0509	7.49898e-05	0.000243123
LOC105615127	49.8631	6.83834	41.8539	0	2.77319	0	32.8518	0.924397	5.32856	7.56633e-05	0.000245046
LOC101119572	3.32421	3.79908	0.930087	34.1275	19.4123	21.8298	2.68446	25.1232	-3.20373	7.7332e-05	0.000250019
LOC105607632	12.4658	15.9561	13.0212	0	0	0	13.8144	0	6.00138	7.83965e-05	0.00025299
LOC106991775	19.1142	34.9515	26.0424	3.19945	0	3.27447	26.7027	2.15798	3.55819	7.89288e-05	0.000254573
LOC105611815	20.7763	27.3534	22.3221	2.13297	2.77319	1.09149	23.4839	1.99922	3.58482	7.98655e-05	0.000257424
LOC105602159	10.8037	18.2356	13.0212	0	0	0	14.0202	0	6.02325	7.98978e-05	0.000257494
LOC105610606	29.0868	18.9954	33.4831	1.06648	2.77319	4.36597	27.1885	2.73521	3.31588	8.02803e-05	0.000258659
MSLN	1.6621	3.03926	3.72035	11.7313	36.0515	33.8362	2.80724	27.2063	-3.27823	8.16014e-05	0.000262499
GCNT7	38.2284	27.3534	31.623	3.19945	8.31957	1.09149	32.4016	4.20351	3.00754	8.48593e-05	0.000272332
PMCH	0	3.79908	0.930087	10.6648	119.247	7.64044	1.57639	45.8508	-4.82432	8.58911e-05	0.000275425
-	32.411	11.3972	19.5318	1.06648	0	0	21.1134	0.355495	5.64959	8.70725e-05	0.00027892
-	0	0	0	10.6648	5.54638	22.9213	0	13.0442	-6.41012	8.77965e-05	0.000281129
LOC106991852	13.2968	18.9954	27.9026	0	1.38659	0	20.0649	0.462198	5.57515	8.98778e-05	0.000287364
CAPNS2	34.0731	13.6767	25.1124	2.13297	1.38659	0	24.2874	1.17319	4.37803	8.98851e-05	0.000287364
LOC105614842	19.1142	17.4758	33.4831	1.06648	0	2.18298	23.3577	1.08316	4.34688	9.04337e-05	0.000289042
MUC6	14.9589	9.11779	17.6717	0	0	0	13.9161	0	6.0087	9.24119e-05	0.000294707
AZGP1	0	5.31871	1.86017	22.3962	20.7989	46.9341	2.39296	30.0431	-3.62468	9.49402e-05	0.00030198
-	3.32421	7.59816	0.930087	24.5292	49.9174	26.1958	3.95082	33.5475	-3.04828	9.64743e-05	0.000306539
-	30.7489	38.7506	30.6929	7.46539	0	4.36597	33.3975	3.94379	3.02117	9.65712e-05	0.000306808
LOC105607543	18.2831	7.59816	16.7416	0	0	0	14.2076	0	6.03877	9.82794e-05	0.000311909
-	215.242	96.4966	78.1273	6988.68	109.541	7056.49	129.955	4718.24	-5.18212	9.87593e-05	0.000313351
LOC105603284	1.6621	6.07853	4.65044	20.2632	58.237	22.9213	4.13036	33.8072	-3.01883	0.000102745	0.000325233
LOC106991759	27.4247	18.9954	19.5318	1.06648	0	1.09149	21.984	0.719325	4.84113	0.000103369	0.000327124
LOC105613121	24.9316	11.3972	23.2522	0	0	1.09149	19.8603	0.363831	5.56017	0.000104139	0.000329391
LOC105602979	19.9452	53.1871	15.8115	0	4.15978	0	29.6479	1.38659	4.5834	0.000106433	0.000336297
LOC101118756	29.9179	49.388	18.6017	6.39891	1.38659	3.27447	32.6359	3.68666	3.10954	0.000108371	0.000341846
-	12.4658	44.0693	24.1823	2.13297	2.77319	0	26.9058	1.63539	4.09135	0.000109109	0.000343949
LOC105614981	19.9452	27.3534	35.3433	5.33242	1.38659	2.18298	27.5473	2.96733	3.17319	0.000110447	0.000347751
LOC105602924	24.9316	28.873	15.8115	2.13297	0	0	23.2053	0.71099	4.92712	0.000111362	0.000350508
-	0	1.51963	0	12.7978	40.2113	12.0064	0.506544	21.6718	-5.30986	0.000112573	0.000354065
LOC105610770	17.4521	11.3972	11.161	0	0	0	13.3368	0	5.95005	0.000112583	0.000354065
-	11.6347	6.07853	28.8327	0	0	0	15.5153	0	6.16344	0.000112973	0.000355213
LOC105612040	32.411	12.1571	15.8115	0	0	1.09149	20.1265	0.363831	5.58134	0.000117313	0.00036805
LOC101102959	0.831052	4.55889	8.37079	25.5956	84.5823	20.7383	4.58691	43.6388	-3.25702	0.000118264	0.000370842
-	39.8905	10.6374	26.9725	0	0	2.18298	25.8335	0.727661	5.07358	0.000120292	0.000376813
LOC106991483	29.9179	22.7945	15.8115	2.13297	0	0	22.8413	0.71099	4.90378	0.000126953	0.000396611
-	11.6347	12.9169	13.9513	0	0	0	12.8343	0	5.89397	0.000129998	0.000405655
LOC105603668	22.4384	30.3926	22.3221	0	1.38659	4.36597	25.051	1.91752	3.69626	0.000132276	0.000412025
LOC101113571	0.831052	0	0.930087	10.6648	30.5051	15.2809	0.587046	18.8169	-5.05098	0.000132855	0.000413777
LOC105615895	27.4247	15.1963	22.3221	1.06648	1.38659	0	21.6477	0.817693	4.78581	0.000133419	0.000415214
LOC101112474	2.49316	3.03926	1.86017	9.59836	31.8917	33.8362	2.4642	25.1088	-3.33324	0.000136042	0.000422945
SST	3.32421	0.759816	8.37079	15.9973	29.1185	82.9534	4.1516	42.6897	-3.39249	0.000136961	0.000425585
LOC105602936	22.4384	18.2356	25.1124	0	0	2.18298	21.9288	0.727661	4.83428	0.000138789	0.000431046
LOC105606004	24.9316	18.2356	3.72035	0	0	0	15.6292	0	6.18149	0.000139633	0.000433445
-	0	0	2.79026	11.7313	97.0616	164.815	0.930087	91.2027	-6.66969	0.00014058	0.000436218
-	5.81736	31.9123	9.30087	0	0	0	15.6768	0	6.18675	0.00014221	0.000441053
LOC101118574	13.2968	34.9515	27.9026	3.19945	0	2.18298	25.3837	1.79415	3.74895	0.000143263	0.000444036
CCNO	0	3.79908	2.79026	13.8643	51.304	20.7383	2.19645	28.6356	-3.68905	0.000144677	0.000448075
LOC105603451	24.9316	15.1963	23.2522	1.06648	0	1.09149	21.1267	0.719325	4.78285	0.000145081	0.000449271
LOC101115112	17.4521	28.1132	20.4619	0	0	2.18298	22.0091	0.727661	4.84279	0.000148635	0.000459343
LOC106991305	11.6347	11.3972	14.8814	0	0	0	12.6378	0	5.87089	0.000149527	0.000461864
LOC105613980	20.7763	9.8776	9.30087	0	0	0	13.3183	0	5.94827	0.000153331	0.000472654
PAPPA	40.7215	24.3141	25.1124	0	6.93297	1.09149	30.0493	2.67482	3.59849	0.00015338	0.000472746
LOC105603993	22.4384	27.3534	31.623	0	4.15978	4.36597	27.1382	2.84192	3.29166	0.000155379	0.000478486
LOC101117475	1.6621	1.51963	0	12.7978	22.1855	19.6468	1.06058	18.2101	-4.05194	0.000163055	0.000500353
MPPED1	0.831052	0.759816	0	1.06648	5.54638	108.058	0.530289	38.2235	-6.13279	0.000164431	0.00050432
LOC101121557	4.98631	85.8592	65.1061	632.426	777.88	530.465	51.9839	646.923	-3.6371	0.000168522	0.000516284
LOC105607442	1.6621	0.759816	0	22.3962	15.2525	14.1894	0.807307	17.2794	-4.38733	0.000168905	0.000517197
-	93.9089	193.753	149.744	0	1.38659	13.0979	145.802	4.82816	4.90325	0.000173668	0.000530982
LOC105612048	29.0868	45.5889	20.4619	2.13297	1.38659	7.64044	31.7126	3.72	3.06157	0.000174638	0.000533544
LOC101104669	19.1142	25.0739	21.392	1.06648	0	3.27447	21.86	1.44699	3.84454	0.000175168	0.000534962
LOC105610941	18.2831	6.07853	15.8115	0	0	0	13.3911	0	5.95322	0.000176251	0.000537935
LOC105604067	18.2831	6.07853	15.8115	0	0	0	13.3911	0	5.95322	0.000176251	0.000537935
LOC101118715	19.9452	15.1963	16.7416	0	0	1.09149	17.2944	0.363831	5.36257	0.000177479	0.000541478
-	16.621	18.9954	15.8115	0	0	1.09149	17.1426	0.363831	5.35103	0.000182894	0.000557024
LOC106991284	19.1142	18.2356	13.9513	0	1.38659	0	17.1004	0.462198	5.34787	0.000190824	0.00057951
LOC105616707	15.79	17.4758	17.6717	1.06648	0	0	16.9791	0.355495	5.33623	0.000192377	0.000583791
LOC105604700	22.4384	13.6767	15.8115	0	1.38659	0	17.3089	0.462198	5.36373	0.00019319	0.000585819
LOC105608952	14.1279	12.1571	10.231	0	0	0	12.172	0	5.81871	0.000194448	0.000589194
SERPIND1	8.31052	15.9561	13.0212	0	0	0	12.4293	0	5.84886	0.000197604	0.000597938
CALCA	0	0	0.930087	3.19945	41.5978	13.0979	0.310029	19.2984	-5.99725	0.000202378	0.000611245
LOC105602037	44.8768	32.6721	38.1336	0	11.0928	3.27447	38.5608	4.78908	3.07929	0.000202514	0.000611582
LOC101118439	15.79	10.6374	10.231	0	0	0	12.2195	0	5.82388	0.000202862	0.00061248
LOC105612351	14.1279	7.59816	15.8115	0	0	0	12.5125	0	5.85521	0.000203517	0.000614231
LOC105607801	21.6074	25.0739	26.9725	0	2.77319	4.36597	24.5513	2.37972	3.38462	0.000212048	0.000639029
LOC101101979	9.14157	15.1963	12.0911	0	0	0	12.143	0	5.8154	0.000213121	0.000642104
LOC105616582	14.1279	9.8776	12.0911	0	0	0	12.0322	0	5.80061	0.000213392	0.000642841
LOC105603169	26.5937	9.11779	18.6017	1.06648	0	0	18.1044	0.355495	5.42715	0.000221224	0.000664626
LOC105612041	20.7763	12.9169	16.7416	0	1.38659	0	16.8116	0.462198	5.32115	0.000225727	0.00067707
LOC105605637	7.47947	12.1571	17.6717	0	0	0	12.4361	0	5.84693	0.000226195	0.00067839
LOC105607499	17.4521	7.59816	12.0911	0	0	0	12.3805	0	5.84126	0.000228813	0.00068582
ADCYAP1	4.15526	6.07853	1.86017	103.449	5.54638	30.5618	4.03132	46.5191	-3.51974	0.000230089	0.000689475
LOC105604647	27.4247	47.1086	4.65044	1.06648	1.38659	0	26.3946	0.817693	5.07047	0.000231918	0.000694613
LOC106991122	19.1142	9.8776	8.37079	0	0	0	12.4542	0	5.85178	0.000232607	0.000696592
LOC105615015	25.7626	7.59816	7.4407	0	0	0	13.6005	0	5.97851	0.00023431	0.000701176
LOC101102528	27.4247	21.2748	16.7416	3.19945	0	0	21.8137	1.06648	4.26296	0.000235471	0.000704303
LOC105615271	35.7352	23.5543	14.8814	1.06648	0	4.36597	24.7236	1.81082	3.70852	0.000241406	0.00072073
LOC105606030	9.97262	31.9123	21.392	1.06648	1.38659	1.09149	21.0923	1.18152	4.17447	0.000243054	0.000725293
LOC105613285	14.9589	16.7159	27.9026	1.06648	0	1.09149	19.8592	0.719325	4.69397	0.000243713	0.000727083
LOC105602784	24.1005	13.6767	13.0212	0	0	1.09149	16.9328	0.363831	5.33285	0.000248355	0.000739392
LOC101108033	94.7399	161.841	93.9388	2290.81	782.04	232.488	116.84	1101.78	-3.23698	0.000251309	0.000747637
LOC105609586	10.8037	9.11779	15.8115	0	0	0	11.911	0	5.78429	0.000251626	0.000748489
LOC101109817	19.9452	29.6328	29.7628	5.33242	0	3.27447	26.447	2.86897	3.13765	0.000252337	0.000750239
LOC105612471	13.2968	5.31871	20.4619	0	0	0	13.0258	0	5.91174	0.000252535	0.000750736
LOC105616311	19.9452	11.3972	6.51061	0	0	0	12.6177	0	5.87156	0.000253662	0.000753903
LOC105609508	19.9452	25.0739	23.2522	1.06648	0	4.36597	22.7571	1.81082	3.58508	0.000253842	0.000754254
-	20.7763	14.4365	13.9513	1.06648	0	0	16.388	0.355495	5.28555	0.000262769	0.000779071
KLHL31	39.0594	5.31871	4.65044	0	0	0	16.3429	0	6.2436	0.000266141	0.000788013
-	14.9589	387.506	170.206	7.46539	1.38659	0	190.89	2.95066	6.00123	0.000266689	0.000789257
LOC105605041	26.5937	17.4758	26.9725	4.26594	0	0	23.6807	1.42198	3.97261	0.000267166	0.000790368
LOC105611820	19.9452	34.9515	28.8327	2.13297	0	6.54895	27.9098	2.89397	3.21302	0.000282864	0.000832369
LOC106990865	24.1005	31.1524	14.8814	2.13297	2.77319	3.27447	23.3781	2.72688	3.10613	0.000286303	0.000841475
LOC105613013	31.58	10.6374	19.5318	1.06648	1.38659	0	20.5831	0.817693	4.71049	0.00028834	0.000847154
LOC105609287	14.9589	14.4365	6.51061	0	0	0	11.9687	0	5.79634	0.000296037	0.000868512
LOC105615679	26.5937	14.4365	20.4619	0	2.77319	0	20.4974	0.924397	4.66104	0.000298178	0.000874583
LOC106991285	21.6074	12.9169	13.9513	0	1.38659	0	16.1585	0.462198	5.26482	0.00029936	0.000877524
LOC101122560	9.14157	30.3926	26.0424	2.13297	1.38659	0	21.8589	1.17319	4.22774	0.000299765	0.000878603
LOC106991756	14.9589	10.6374	24.1823	1.06648	0	0	16.5929	0.355495	5.29959	0.000307811	0.000899807
LOC105604963	20.7763	19.7552	21.392	0	0	3.27447	20.6412	1.09149	4.17146	0.000308749	0.00090244
-	0	3.03926	0	9.59836	63.7834	9.82342	1.01309	27.7351	-4.69901	0.000310101	0.000906067
LOC105602160	11.6347	15.9561	7.4407	0	0	0	11.6772	0	5.76095	0.000316334	0.000923061
LOC105615110	21.6074	8.35797	20.4619	1.06648	0	0	16.8091	0.355495	5.31908	0.000325288	0.000947261
LOC105613234	0.831052	2.27945	2.79026	11.7313	24.9587	21.8298	1.96692	19.5066	-3.31312	0.000325957	0.000948868
-	0.831052	0	1.86017	3.19945	42.9844	21.8298	0.897076	22.6712	-4.71069	0.000326636	0.000950277
-	11.6347	10.6374	28.8327	0	1.38659	0	17.035	0.462198	5.33675	0.00033986	0.000985691
LOC105605156	23.2695	9.8776	15.8115	0	0	1.09149	16.3195	0.363831	5.27791	0.000341533	0.000990191
TSPYL6	12.4658	14.4365	7.4407	0	0	0	11.4477	0	5.73194	0.000342114	0.000991285
LOC105614184	43.2147	26.5936	20.4619	4.26594	0	6.54895	30.0901	3.60496	3.00706	0.000349833	0.00101137
LOC105602202	24.9316	30.3926	3.72035	1.06648	0	0	19.6815	0.355495	5.55321	0.000354512	0.00102429
LOC105605270	15.79	22.7945	17.6717	1.06648	0	2.18298	18.752	1.08316	4.03585	0.000356937	0.00103093
LOC105616678	19.1142	26.5936	20.4619	1.06648	0	4.36597	22.0566	1.81082	3.54187	0.00036029	0.00103999
LOC105609549	21.6074	7.59816	7.4407	0	0	0	12.2154	0	5.82353	0.000362981	0.00104702
LOC105616192	5.81736	13.6767	15.8115	0	0	0	11.7685	0	5.76832	0.000365878	0.00105425
-	1.6621	4.55889	0	17.0638	36.0515	17.4639	2.07367	23.5264	-3.44942	0.000369379	0.00106359
LOC101108480	0	0	0.930087	7.46539	18.0257	14.1894	0.310029	13.2268	-5.45643	0.000370986	0.00106781
LOC105615619	19.9452	12.9169	31.623	1.06648	0	3.27447	21.495	1.44699	3.81993	0.000376054	0.00108076
-	6.64842	1.51963	0.930087	77.8534	13.8659	14.1894	3.03271	35.3029	-3.54027	0.00037868	0.00108741
LOC105612560	14.1279	12.1571	7.4407	0	0	0	11.2419	0	5.70512	0.000379538	0.00108962
LOC105603914	36.5663	18.9954	21.392	0	1.38659	5.45746	25.6512	2.28135	3.47265	0.00038093	0.0010931
-	7.47947	34.1917	26.9725	0	2.77319	0	22.8812	0.924397	4.8086	0.000381037	0.00109328
LOC106991739	9.97262	15.1963	8.37079	0	0	0	11.1799	0	5.6977	0.000388123	0.00111236
LOC105605504	14.1279	6.83834	13.0212	0	0	0	11.3291	0	5.71238	0.000388289	0.00111264
LOC105605750	16.621	21.2748	32.5531	1.06648	4.15978	3.27447	23.483	2.83358	3.08339	0.000388604	0.00111322
LOC106990927	42.3836	14.4365	19.5318	2.13297	0	4.36597	25.4507	2.16631	3.4925	0.000388628	0.00111322
-	10.8037	9.8776	12.0911	0	0	0	10.9241	0	5.66101	0.000389169	0.00111451
LOC105615398	25.7626	37.231	13.0212	2.13297	2.77319	4.36597	25.3383	3.09071	3.03517	0.000391757	0.00112144
LOC105605368	0	1.51963	0	8.53188	18.0257	22.9213	0.506544	16.493	-4.9245	0.000395296	0.00113073
LOC105602054	48.201	12.1571	11.161	1.06648	2.77319	0	23.8397	1.27989	4.30723	0.000408458	0.00116578
LOC101112122	78.9499	44.8291	499.457	4.26594	9.70616	21.8298	207.745	11.934	4.11968	0.000411098	0.00117235
LOC106991160	24.1005	13.6767	24.1823	0	0	3.27447	20.6532	1.09149	4.17257	0.000419321	0.00119441
PTCHD4	19.1142	148.924	4.65044	5.33242	5.54638	1.09149	57.5628	3.9901	3.86544	0.000423499	0.00120504
LOC101112996	13.2968	26.5936	22.3221	3.19945	1.38659	0	20.7375	1.52868	3.74777	0.000427273	0.00121493
LOC105611974	19.1142	20.515	15.8115	0	0	2.18298	18.4802	0.727661	4.59206	0.000428333	0.0012178
LOC106991649	12.4658	36.4712	19.5318	2.13297	0	3.27447	22.8229	1.80248	3.59777	0.000429863	0.00122186
LOC101111846	4.98631	19.7552	11.161	0	0	0	11.9675	0	5.79565	0.000433355	0.00123107
LOC105615472	13.2968	12.1571	7.4407	0	0	0	10.9649	0	5.66915	0.000434487	0.00123386
SPPL2C	29.0868	12.1571	34.4132	3.19945	4.15978	2.18298	25.219	3.18074	3.00216	0.000434979	0.00123511
LOC105615485	14.1279	7.59816	11.161	0	0	0	10.9624	0	5.66578	0.000440272	0.00124883
LOC105615810	29.0868	41.7899	4.65044	1.06648	2.77319	1.09149	25.1757	1.64372	3.98907	0.000463218	0.00130752
LOC106990849	24.1005	12.9169	24.1823	3.19945	0	0	20.3999	1.06648	4.16622	0.000471668	0.00132968
LOC105615035	14.9589	6.83834	11.161	0	0	0	10.9861	0	5.6687	0.000474636	0.00133743
-	5.81736	18.2356	10.231	0	0	0	11.428	0	5.72922	0.000479732	0.0013507
LOC105605382	20.7763	24.3141	15.8115	2.13297	0	3.27447	20.3006	1.80248	3.42473	0.000491652	0.00138011
LOC105605187	0.831052	0.759816	0	7.46539	16.6391	20.7383	0.530289	14.9476	-4.76274	0.000500722	0.00140315
-	10.8037	23.5543	19.5318	1.06648	1.38659	1.09149	17.9633	1.18152	3.94196	0.000500828	0.00140329
LOC105603858	15.79	10.6374	6.51061	0	0	0	10.9793	0	5.67089	0.00050439	0.00141229
LOC101108322	2.49316	3.03926	0	14.9308	18.0257	25.1043	1.84414	19.3536	-3.35087	0.000510876	0.00142963
LOC106991351	24.9316	22.0347	29.7628	1.06648	6.93297	0	25.5763	2.66649	3.36462	0.000512168	0.00143292
LOC105605293	6.64842	27.3534	28.8327	2.13297	0	1.09149	20.9448	1.07482	4.20376	0.000530998	0.0014822
LOC105613099	20.7763	9.8776	13.9513	1.06648	0	0	14.8684	0.355495	5.14388	0.000540086	0.00150601
TMEM74	29.0868	17.4758	13.9513	1.06648	1.38659	3.27447	20.1713	1.90918	3.38636	0.000557449	0.00155194
KCNJ13	39.0594	114.732	64.176	158.906	2006.4	457.335	72.6559	874.215	-3.5881	0.000560522	0.00155943
-	9.14157	11.3972	26.0424	1.06648	0	0	15.5271	0.355495	5.20338	0.000566409	0.00157455
LOC106991416	12.4658	12.1571	18.6017	1.06648	0	0	14.4082	0.355495	5.09727	0.000567109	0.00157614
HTR1F	2.49316	1.51963	0.930087	6.39891	33.2783	19.6468	1.64762	19.7747	-3.56528	0.000568267	0.00157899
LOC105605896	8.31052	9.8776	13.0212	0	0	0	10.4031	0	5.58999	0.000570188	0.00158361
LOC101108109	0	0.759816	0.930087	8.53188	12.4794	22.9213	0.563301	14.6442	-4.71584	0.000576639	0.00160025
LOC105614828	13.2968	10.6374	7.4407	0	0	0	10.4583	0	5.60045	0.000577432	0.00160227
-	14.9589	22.0347	25.1124	3.19945	2.77319	0	20.702	1.99088	3.40054	0.000588374	0.00162929
-	12.4658	9.11779	9.30087	0	0	0	10.2948	0	5.57635	0.000588498	0.00162944
LOC106990845	9.14157	7.59816	14.8814	0	0	0	10.5404	0	5.60741	0.000590702	0.00163462
LOC101106344	31.58	36.4712	28.8327	87.4518	108.154	677.816	32.2946	291.141	-3.17234	0.000595929	0.00164722
LOC105607433	11.6347	18.9954	23.2522	1.06648	0	2.18298	17.9608	1.08316	3.97317	0.000606022	0.00167322
C6H4orf17	26.5937	14.4365	23.2522	3.19945	0	3.27447	21.4274	2.15798	3.24187	0.000626576	0.0017255
LOC105606568	7.47947	31.1524	22.3221	0	1.38659	2.18298	20.318	1.18986	4.11496	0.000626586	0.0017255
PDZK1IP1	0	2.27945	3.72035	37.327	47.1442	3.27447	1.99993	29.2486	-3.88209	0.000638202	0.00175353
-	19.1142	4.55889	10.231	0	0	0	11.3014	0	5.70951	0.000641433	0.00176181
LOC105601984	6.64842	18.9954	56.7353	2.13297	1.38659	3.27447	27.4597	2.26468	3.57437	0.00065972	0.00180793
LOC105609743	9.97262	10.6374	9.30087	0	0	0	9.97031	0	5.53065	0.000687527	0.00187783
LOC106991574	12.4658	5.31871	13.9513	0	0	0	10.5786	0	5.61249	0.000690059	0.0018839
LOC105609935	15.79	13.6767	19.5318	1.06648	1.38659	0	16.3328	0.817693	4.37682	0.000712872	0.00194053
LOC105606047	21.6074	27.3534	13.9513	1.06648	0	4.36597	20.9707	1.81082	3.47326	0.000718271	0.00195436
LOC106991514	17.4521	24.3141	14.8814	0	0	3.27447	18.8825	1.09149	4.04793	0.000723203	0.0019669
LOC105607995	14.9589	13.6767	20.4619	1.06648	1.38659	0	16.3658	0.817693	4.3793	0.000724022	0.00196869
NPPA	0.831052	2.27945	0	472.453	30.5051	1.09149	1.03683	168.016	-7.31839	0.000728177	0.00197888
LOC105605518	10.8037	6.07853	13.9513	0	0	0	10.2778	0	5.57089	0.000734837	0.00199609
LOC105612266	6.64842	10.6374	13.0212	0	0	0	10.1024	0	5.54788	0.000748464	0.00203062
LOC106991068	17.4521	3.79908	12.0911	0	0	0	11.1141	0	5.68453	0.000752598	0.00204092
LOC106990928	7.47947	7.59816	15.8115	0	0	0	10.2964	0	5.5732	0.000755094	0.00204659
LOC101111174	9.14157	21.2748	12.0911	0	0	1.09149	14.1692	0.363831	5.07789	0.000758113	0.00205451
LOC106991600	14.1279	11.3972	14.8814	1.06648	0	0	13.4688	0.355495	5.00098	0.000772439	0.00208985
ANGPTL3	14.1279	11.3972	14.8814	1.06648	0	0	13.4688	0.355495	5.00098	0.000772439	0.00208985
LOC105611545	14.1279	6.83834	9.30087	0	0	0	10.089	0	5.54642	0.000778771	0.00210534
ZFYVE28	15.79	16.7159	14.8814	1.06648	0	1.09149	15.7958	0.719325	4.36849	0.000779842	0.00210777
LOC105613928	15.79	5.31871	10.231	0	0	0	10.4466	0	5.59592	0.000780228	0.00210858
LOC101106724	13.2968	9.11779	7.4407	0	0	0	9.95177	0	5.5283	0.000789545	0.00213187
LOC106990812	9.97262	16.7159	13.9513	1.06648	0	0	13.5466	0.355495	5.01128	0.000804695	0.00217061
LOC105607438	26.5937	12.1571	12.0911	1.06648	1.38659	0	16.9473	0.817693	4.43079	0.0008087	0.00218069
-	22.4384	12.9169	15.8115	0	0	2.18298	17.0556	0.727661	4.47655	0.000812945	0.0021902
LOC105612912	17.4521	12.9169	10.231	1.06648	0	0	13.5333	0.355495	5.01023	0.000814721	0.00219474
LOC106991627	16.621	14.4365	18.6017	1.06648	0	2.18298	16.5531	1.08316	3.85492	0.000823242	0.00221549
-	0	5.31871	3.72035	20.2632	58.237	12.0064	3.01302	30.1689	-3.30956	0.000828194	0.00222685
LOC105606201	15.79	18.2356	20.4619	0	0	3.27447	18.1625	1.09149	3.98912	0.000843113	0.00226496
-	24.9316	12.9169	24.1823	1.06648	0	4.36597	20.6769	1.81082	3.44866	0.000850726	0.00228391
LOC105612994	12.4658	8.35797	8.37079	0	0	0	9.73151	0	5.49528	0.000861546	0.00231066
LOC105604690	9.97262	6.07853	13.9513	0	0	0	10.0008	0	5.53134	0.000862081	0.00231159
LOC105605139	16.621	15.9561	21.392	1.06648	0	3.27447	17.9897	1.44699	3.56468	0.000867011	0.00232353
CLDN20	12.4658	13.6767	13.0212	1.06648	0	0	13.0546	0.355495	4.95734	0.0008907	0.00238204
-	4.15526	15.1963	12.0911	0	0	0	10.4809	0	5.60285	0.000892999	0.00238688
LOC105616289	9.14157	18.2356	13.0212	1.06648	0	0	13.4661	0.355495	5.00345	0.000896069	0.0023943
LOC101103974	28.2558	7.59816	19.5318	2.13297	0	0	18.4619	0.71099	4.60188	0.000897832	0.00239821
-	20.7763	11.3972	15.8115	1.06648	1.38659	0	15.995	0.817693	4.34658	0.000898282	0.0023989
LOC105609553	13.2968	6.07853	10.231	0	0	0	9.86877	0	5.51384	0.000908929	0.00242547
LOC105602781	7.47947	12.1571	9.30087	0	0	0	9.6458	0	5.48343	0.000913277	0.0024352
LOC105615632	9.97262	11.3972	7.4407	0	0	0	9.60352	0	5.47776	0.000918468	0.00244851
LOC101108550	0	0	0	1.06648	18.0257	13.0979	0	10.73	-6.11556	0.000923119	0.00245956
LACTBL1	23.2695	9.8776	53.9451	4.26594	0	4.36597	29.0307	2.8773	3.27805	0.000925876	0.0024661
LOC105602156	16.621	10.6374	12.0911	0	0	1.09149	13.1165	0.363831	4.96363	0.000942027	0.00250802
LOC105603664	9.14157	9.8776	9.30087	0	0	0	9.44002	0	5.45147	0.000956257	0.0025423
-	0	0	0	6.39891	8.31957	9.82342	0	8.18063	-5.73033	0.000962218	0.00255678
LOC105615922	21.6074	15.9561	12.0911	2.13297	0	0	16.5515	0.71099	4.44422	0.000964672	0.00256216
LOC105605132	17.4521	6.83834	16.7416	0	1.38659	0	13.6773	0.462198	5.02146	0.000981155	0.00260282
LOC105608569	14.1279	9.8776	14.8814	0	1.38659	0	12.9623	0.462198	4.9451	0.000982753	0.00260629
LOC105606280	0	2.27945	4.65044	6.39891	29.1185	41.4767	2.30996	25.6647	-3.49353	0.000989919	0.00262432
LOC105609423	35.7352	3.79908	30.6929	2.13297	0	2.18298	23.4091	1.43865	3.95695	0.000998214	0.00264433
-	0	4.55889	0.930087	28.7951	5.54638	40.3852	1.82966	24.9089	-3.73779	0.00100281	0.00265391
LOC101113411	29.0868	10.6374	43.7141	1.06648	0	6.54895	27.8128	2.53848	3.40174	0.00100917	0.00266871
LOC105609296	9.14157	10.6374	8.37079	0	0	0	9.38326	0	5.44354	0.00100977	0.00267
DQB	3.32421	7.59816	3.72035	56.5237	1.38659	87.3193	4.88091	48.4099	-3.3067	0.00101725	0.00268776
LOC106991236	14.1279	20.515	13.9513	2.13297	0	0	16.1981	0.71099	4.41338	0.00102717	0.00271044
LOC105602227	19.1142	14.4365	15.8115	0	2.77319	0	16.4541	0.924397	4.33851	0.00104121	0.00274511
ADAMTS8	13.2968	36.4712	37.2035	0	4.15978	6.54895	28.9905	3.56958	3.03448	0.00104228	0.00274703
LOC105609567	15.79	11.3972	22.3221	2.13297	0	0	16.5031	0.71099	4.43643	0.00104408	0.00275118
LOC101111210	9.97262	25.8337	13.0212	0	1.38659	1.09149	16.2759	0.826029	4.37003	0.001071	0.00281632
-	7.47947	13.6767	7.4407	0	0	0	9.53228	0	5.46777	0.00107818	0.00283306
LOC101104325	14.1279	21.2748	13.0212	2.13297	0	1.09149	16.1413	1.07482	3.82733	0.0010932	0.0028713
KL	14.1279	84.3396	60.4557	117.313	1767.91	377.656	52.9744	754.293	-3.83123	0.00110497	0.00289897
LOC105615865	13.2968	12.1571	12.0911	0	1.38659	0	12.515	0.462198	4.89631	0.00110516	0.00289897
LOC105603991	9.97262	6.83834	11.161	0	0	0	9.324	0	5.43149	0.00112461	0.00294744
LOC105602744	10.8037	7.59816	9.30087	0	0	0	9.23424	0	5.41876	0.0011377	0.00297984
-	12.4658	9.11779	16.7416	1.06648	0	0	12.775	0.355495	4.92309	0.00114952	0.00300885
LOC105605938	24.1005	23.5543	13.9513	1.06648	5.54638	1.09149	20.5354	2.56812	3.08083	0.00117264	0.00306477
STAP1	19.1142	12.9169	19.5318	2.13297	1.38659	2.18298	17.1876	1.90085	3.15432	0.00117398	0.00306794
P2RY4	7.47947	10.6374	9.30087	0	0	0	9.13925	0	5.40502	0.00120764	0.00314881
LOC101118825	3.32421	0	1.86017	12.7978	29.1185	13.0979	1.72813	18.3381	-3.42247	0.00121972	0.00317792
LOC105611043	5.81736	12.9169	9.30087	0	0	0	9.34504	0	5.43796	0.00124977	0.00325136
-	0.831052	0.759816	0.930087	13.8643	6.93297	17.4639	0.840318	12.7537	-3.93839	0.00127992	0.00332376
LOC105616484	16.621	7.59816	13.9513	1.06648	0	0	12.7235	0.355495	4.91803	0.00128034	0.00332448
LOC106991291	5.81736	9.8776	12.0911	0	0	0	9.26204	0	5.42257	0.00128162	0.00332747
-	6.64842	5.31871	17.6717	0	0	0	9.8796	0	5.51221	0.00129177	0.00335133
LOC105616041	13.2968	9.11779	5.58052	0	0	0	9.33171	0	5.43634	0.00130207	0.00337696
LOC106991613	16.621	18.2356	15.8115	3.19945	0	0	16.8894	1.06648	3.89806	0.00130947	0.0033947
-	11.6347	20.515	28.8327	4.26594	0	0	20.3275	1.42198	3.75931	0.00131649	0.0034111
LOC105615592	8.31052	7.59816	11.161	0	0	0	9.02324	0	5.38436	0.00132188	0.00342361
-	9.14157	21.2748	8.37079	0	1.38659	0	12.9291	0.462198	4.94718	0.00136271	0.00352337
LOC105604459	21.6074	16.7159	23.2522	5.33242	0	1.09149	20.5252	2.14131	3.18968	0.00136401	0.00352634
SCP2D1	15.79	15.1963	13.0212	1.06648	1.38659	1.09149	14.6692	1.18152	3.64973	0.00139032	0.00358864
LOC106991679	11.6347	13.6767	3.72035	0	0	0	9.67725	0	5.49085	0.00140018	0.00361027
LOC105615183	42.3836	12.1571	13.0212	0	0	4.36597	22.5206	1.45532	3.89762	0.0014077	0.00362737
ANKRD1	22.4384	12.1571	24.1823	3.19945	0	3.27447	19.5926	2.15798	3.11422	0.0014284	0.00367643
LOC105609808	14.1279	14.4365	13.9513	1.06648	0	1.09149	14.1719	0.719325	4.21309	0.00144835	0.00372386
-	19.9452	25.0739	26.9725	0	6.93297	0	23.9972	2.31099	3.49904	0.00145716	0.00374454
LOC105604752	17.4521	6.07853	14.8814	0	0	1.09149	12.804	0.363831	4.92651	0.00145761	0.00374489
GPR31	17.4521	25.0739	12.0911	1.06648	4.15978	0	18.2057	1.74209	3.48845	0.00153337	0.00392711
LOC101122148	59.8357	6.83834	13.9513	585.5	722.416	37.1107	26.8751	448.342	-4.06018	0.00156031	0.00398856
LOC101106386	0.831052	1.51963	2.79026	33.061	15.2525	5.45746	1.71365	17.9237	-3.40793	0.00157998	0.00403461
SLC51A	16.621	14.4365	33.4831	3.19945	0	4.36597	21.5136	2.52181	3.02955	0.00159285	0.00406323
-	21.6074	12.1571	17.6717	0	1.38659	3.27447	17.1454	1.55369	3.4622	0.00161634	0.00411842
LOC101121770	15.79	18.2356	12.0911	0	2.77319	0	15.3722	0.924397	4.23829	0.00163122	0.00415286
LOC105602539	6.64842	9.11779	10.231	0	0	0	8.66572	0	5.32707	0.00167641	0.00425855
LOC105612215	19.1142	6.83834	11.161	1.06648	0	0	12.3712	0.355495	4.87842	0.00168526	0.00428013
LOC105607599	9.97262	10.6374	5.58052	0	0	0	8.73019	0	5.34091	0.00174142	0.00441173
LOC105607961	19.1142	14.4365	17.6717	3.19945	0	2.18298	17.0741	1.79415	3.17735	0.00174615	0.00442214
LOC101109417	2.49316	2.27945	0	5.33242	27.7319	21.8298	1.59087	18.2981	-3.48399	0.00175744	0.00444723
LOC105607824	18.2831	25.8337	21.392	6.39891	0	1.09149	21.8363	2.4968	3.06458	0.00177611	0.00449075
LOC105609269	10.8037	9.11779	14.8814	0	1.38659	0	11.601	0.462198	4.78436	0.00179525	0.00453585
-	19.1142	21.2748	12.0911	0	4.15978	1.09149	17.4934	1.75043	3.42713	0.00182338	0.00459979
LOC106991788	11.6347	21.2748	12.0911	0	0	2.18298	15.0002	0.727661	4.29663	0.00182639	0.00460689
LOC105602968	1.6621	0	1.86017	6.39891	13.8659	25.1043	1.17409	15.1231	-3.72843	0.00183939	0.00463824
LOC105614707	13.2968	15.1963	20.4619	1.06648	0	3.27447	16.3184	1.44699	3.42602	0.00184179	0.00464286
LOC105602544	25.7626	11.3972	16.7416	1.06648	4.15978	0	17.9671	1.74209	3.46406	0.00184298	0.00464538
LOC105603634	8.31052	15.9561	3.72035	0	0	0	9.329	0	5.43871	0.00184479	0.00464897
LOC105604265	11.6347	7.59816	6.51061	0	0	0	8.58117	0	5.31436	0.00186889	0.00470436
LOC106991680	4.98631	8.35797	13.0212	0	0	0	8.7885	0	5.3457	0.00191067	0.00480506
LOC106991079	9.14157	6.83834	9.30087	0	0	0	8.42693	0	5.28626	0.0019156	0.00481645
LOC105603705	9.14157	6.83834	9.30087	0	0	0	8.42693	0	5.28626	0.0019156	0.00481645
-	18.2831	15.9561	10.231	2.13297	0	1.09149	14.8234	1.07482	3.70589	0.00192104	0.00482914
TNP2	0	2.27945	4.65044	21.3297	41.5978	6.54895	2.30996	23.1588	-3.33924	0.00195894	0.00491682
LOC106991080	6.64842	7.59816	11.161	0	0	0	8.46921	0	5.29277	0.00196939	0.004941
LOC105610316	17.4521	18.9954	13.9513	3.19945	0	2.18298	16.7996	1.79415	3.15692	0.00197195	0.00494693
LOC101122611	7.47947	12.1571	14.8814	0	1.38659	0	11.506	0.462198	4.77359	0.00199636	0.00500198
LOC106991806	19.9452	11.3972	25.1124	4.26594	0	0	18.8183	1.42198	3.64795	0.00200998	0.00503403
LOC105610324	1.6621	19.7552	2.79026	9.59836	40.2113	159.358	8.06919	69.7225	-3.09928	0.00202159	0.00506206
CEACAM20	49.0321	33.4319	66.0362	0	18.0257	1.09149	49.5001	6.37241	3.01368	0.00202974	0.00508039
LOC105608312	16.621	13.6767	14.8814	1.06648	2.77319	1.09149	15.0597	1.64372	3.24927	0.00203508	0.00509219
LOC106990816	9.14157	10.6374	5.58052	0	0	0	8.45317	0	5.29444	0.00205609	0.00514055
LOC105605347	16.621	11.3972	15.8115	2.13297	1.38659	0	14.6099	1.17319	3.64454	0.00212231	0.00529469
LOC101105809	24.9316	10.6374	13.0212	2.13297	0	2.18298	16.1967	1.43865	3.42129	0.00220995	0.00549535
-	15.79	21.2748	11.161	1.06648	0	3.27447	16.0753	1.44699	3.41033	0.00226811	0.00563077
LOC105605444	11.6347	4.55889	9.30087	0	0	0	8.49817	0	5.29761	0.0022731	0.00563931
GALR3	8.31052	17.4758	14.8814	1.06648	0	1.09149	13.5559	0.719325	4.15209	0.00227317	0.00563931
-	1.6621	2.27945	1.86017	5.33242	37.4381	12.0064	1.93391	18.259	-3.22085	0.00232808	0.00576672
LOC101115436	10.8037	11.3972	3.72035	0	0	0	8.64042	0	5.32702	0.0023426	0.00579857
LOC105604780	9.97262	6.07853	8.37079	0	0	0	8.14065	0	5.23655	0.00240421	0.00593721
NPY2R	4.98631	1.51963	26.9725	0	0	0	11.1595	0	5.68709	0.00243428	0.00600539
LOC101109881	0.831052	1.51963	0	30.9281	2.77319	10.9149	0.783561	14.8721	-4.20437	0.00243841	0.00601376
LIM2	0	3.03926	4.65044	33.061	15.2525	13.0979	2.56323	20.4705	-3.01546	0.00243847	0.00601376
LY6K	7.47947	8.35797	18.6017	1.06648	0	0	11.4797	0.355495	4.76754	0.00243867	0.00601376
LOC105611883	0.831052	2.27945	0.930087	35.194	12.4794	3.27447	1.34686	16.9826	-3.63867	0.00245962	0.0060636
SLC6A7	2.49316	0.759816	1.86017	38.3935	9.70616	5.45746	1.70438	17.8524	-3.40767	0.0024775	0.00610335
SEMA3E	6.64842	23.5543	4.65044	15.9973	388.247	97.1427	11.6177	167.129	-3.84093	0.00248829	0.00612622
-	10.8037	17.4758	22.3221	2.13297	0	3.27447	16.8672	1.80248	3.15892	0.00253397	0.00622862
LRRD1	9.97262	20.515	11.161	1.06648	1.38659	1.09149	13.8829	1.18152	3.57208	0.00254286	0.00624921
LOC106990382	1.6621	0.759816	8.37079	7.46539	84.5823	13.0979	3.59757	35.0485	-3.30279	0.00257383	0.00632276
-	36.5663	38.7506	13.0212	1.06648	9.70616	0	29.446	3.59088	3.11626	0.00258976	0.00635679
-	0	3.03926	1.86017	6.39891	16.6391	28.3788	1.63315	17.1389	-3.37813	0.0026599	0.00650994
MIR181A-2	11.6347	18.2356	14.8814	2.13297	0	2.18298	14.9172	1.43865	3.30232	0.00268599	0.00656983
LOC105605801	4.15526	11.3972	9.30087	0	0	0	8.28446	0	5.26353	0.00268912	0.00657683
-	5.81736	15.1963	34.4132	2.13297	1.38659	2.18298	18.4756	1.90085	3.25924	0.00278492	0.00678301
-	12.4658	15.1963	10.231	1.06648	0	1.09149	12.631	0.719325	4.05128	0.00283396	0.00689026
AQP10	0	5.31871	2.79026	55.4572	15.2525	7.64044	2.70299	26.1167	-3.26409	0.00286787	0.00696438
LOC101102357	0	0	0.930087	1.06648	15.2525	17.4639	0.310029	11.261	-5.22579	0.00286983	0.00696845
-	14.1279	9.11779	2.79026	0	0	0	8.67864	0	5.33277	0.00289961	0.00703446
-	0.831052	3.79908	0.930087	40.5264	13.8659	4.36597	1.85341	19.5861	-3.37713	0.00293293	0.00710891
LOC105602001	14.9589	9.11779	19.5318	1.06648	2.77319	0	14.5362	1.27989	3.59118	0.00297837	0.00720615
LOC105607914	2.49316	10.6374	13.0212	0	0	0	8.71727	0	5.335	0.00298229	0.00721205
LOC105615772	12.4658	12.9169	6.51061	0	0	1.09149	10.6311	0.363831	4.66381	0.00300906	0.00727246
LOC105604283	6.64842	9.11779	7.4407	0	0	0	7.73563	0	5.16479	0.00302996	0.007315
LOC101116593	20.7763	11.3972	19.5318	391.4	115.087	15.2809	17.2351	173.923	-3.33654	0.00305148	0.00736403
LOC105604851	9.14157	7.59816	28.8327	2.13297	0	0	15.1908	0.71099	4.3229	0.00305278	0.00736644
LOC105609947	17.4521	13.6767	24.1823	1.06648	5.54638	0	18.437	2.20429	3.15946	0.00308161	0.00742864
LOC101108906	12.4658	8.35797	10.231	0	0	1.09149	10.3516	0.363831	4.62169	0.00310003	0.00746715
LOC105613531	12.4658	8.35797	10.231	1.06648	0	0	10.3516	0.355495	4.62169	0.00310406	0.00747539
-	7.47947	13.6767	10.231	1.06648	0	0	10.4624	0.355495	4.63915	0.00310896	0.00748497
GPR82	11.6347	6.83834	13.0212	1.06648	0	0	10.4981	0.355495	4.63997	0.00314374	0.00755973
-	0	0.759816	0.930087	9.59836	23.5721	3.27447	0.563301	12.1483	-4.43115	0.00315031	0.00757329
C22H10orf62	11.6347	23.5543	9.30087	2.13297	1.38659	1.09149	14.83	1.53702	3.26559	0.00316497	0.00760329
DUXA	4.15526	11.3972	8.37079	0	0	0	7.97443	0	5.20901	0.00323868	0.00777118
LOC105609824	13.2968	13.6767	10.231	1.06648	1.38659	0	12.4015	0.817693	3.98013	0.00324573	0.00778733
-	9.14157	27.3534	11.161	2.13297	0	2.18298	15.8853	1.43865	3.40061	0.00325201	0.00780162
TMEM238	0	3.03926	0	7.46539	22.1855	15.2809	1.01309	14.9773	-3.81119	0.00327303	0.00784743
LOC105603351	13.2968	9.11779	8.37079	1.06648	0	0	10.2618	0.355495	4.61044	0.00331041	0.00793235
MUC15	4.15526	3.79908	18.6017	0	0	0	8.85203	0	5.3528	0.00334377	0.00800365
LOC105615517	6.64842	6.07853	10.231	0	0	0	7.65263	0	5.14604	0.00340186	0.00813071
EPS8L3	17.4521	9.11779	11.161	1.06648	1.38659	0	12.577	0.817693	3.9976	0.00342581	0.00818234
LOC101108075	8.31052	15.9561	16.7416	1.06648	0	2.18298	13.6694	1.08316	3.58468	0.00342871	0.00818845
LOC105606884	11.6347	6.07853	5.58052	0	0	0	7.76459	0	5.16992	0.00344861	0.00823114
LOC105613972	9.14157	20.515	13.0212	1.06648	2.77319	0	14.2259	1.27989	3.56457	0.00347505	0.00828857
LOC105605166	21.6074	9.8776	13.9513	3.19945	0	0	15.1454	1.06648	3.74519	0.003493	0.00832569
LOC105615734	8.31052	15.9561	18.6017	1.06648	1.38659	2.18298	14.2895	1.54535	3.20251	0.00350178	0.00834416
LOC105604535	14.1279	2.27945	9.30087	0	0	0	8.5694	0	5.30923	0.00350403	0.00834871
LOC106991911	5.81736	15.1963	3.72035	0	0	0	8.24468	0	5.26066	0.00355002	0.00845086
LOC105613059	12.4658	9.11779	14.8814	1.06648	0	1.09149	12.155	0.719325	3.99203	0.0035678	0.00848736
LOC105607481	9.14157	6.83834	6.51061	0	0	0	7.49684	0	5.11905	0.00360077	0.00855578
LOC105615107	19.1142	17.4758	13.0212	4.26594	1.38659	0	16.5371	1.88418	3.11064	0.00360419	0.00856308
LOC101103982	12.4658	8.35797	26.9725	3.19945	0	0	15.9321	1.06648	3.81741	0.00364765	0.00865957
LOC101119651	9.97262	3.03926	11.161	0	0	0	8.05765	0	5.2192	0.00366127	0.00868936
LOC105610928	4.98631	7.59816	10.231	0	0	0	7.60514	0	5.13777	0.0036707	0.00870835
LOC106991312	23.2695	8.35797	12.0911	0	2.77319	1.09149	14.5729	1.28823	3.5904	0.00367889	0.00872609
-	154.576	470.326	610.137	69.3215	5.54638	77.4959	411.68	50.7879	3.01565	0.00370287	0.00877783
LOC101122076	10.8037	3.03926	10.231	0	0	0	8.02463	0	5.21375	0.00371654	0.00880768
LOC106991141	15.79	9.11779	13.9513	0	0	2.18298	12.953	0.727661	4.08251	0.00375427	0.00888932
LOC105615920	23.2695	7.59816	19.5318	1.06648	4.15978	0	16.7998	1.74209	3.35965	0.0037854	0.00895433
LOC105612405	29.0868	22.0347	31.623	0	9.70616	0	27.5815	3.23539	3.18351	0.00383362	0.00906312
LOC101101943	2.49316	0.759816	1.86017	7.46539	19.4123	14.1894	1.70438	13.689	-3.01208	0.00386283	0.00912684
LOC105614635	9.14157	18.9954	11.161	0	0	2.18298	13.0993	0.727661	4.10332	0.00387311	0.00914937
-	0	0	0	15.9973	4.15978	2.18298	0	7.44668	-5.60089	0.00387606	0.00915367
ESR2	14.1279	6.07853	3.72035	0	0	0	7.97559	0	5.20955	0.00392691	0.00926389
LOC105602921	10.8037	7.59816	11.161	1.06648	0	0	9.85429	0.355495	4.54968	0.00393964	0.00929213
MYO3A	1.6621	2.27945	0.930087	4.26594	30.5051	12.0064	1.62388	15.5925	-3.23159	0.00396548	0.00934854
-	0	0	0.930087	8.53188	18.0257	2.18298	0.310029	9.5802	-4.98608	0.00398769	0.00939635
LOC105604702	11.6347	7.59816	10.231	0	0	1.09149	9.82128	0.363831	4.54537	0.00400647	0.00943058
LOC105604553	4.98631	9.8776	7.4407	0	0	0	7.43487	0	5.10789	0.00406025	0.0095461
LOC105607945	7.47947	6.07853	8.37079	0	0	0	7.30959	0	5.08091	0.00406678	0.00955871
LOC105607590	14.1279	12.1571	11.161	2.13297	0	0	12.482	0.71099	4.04085	0.00407443	0.00957391
SPINK8	9.14157	15.1963	11.161	1.06648	0	1.09149	11.833	0.719325	3.95804	0.00407755	0.00958032
LOC105612530	6.64842	9.8776	5.58052	0	0	0	7.36885	0	5.09624	0.00413499	0.00970031
LOC105615066	6.64842	5.31871	10.231	0	0	0	7.39936	0	5.09702	0.00416608	0.00976761
LOC105603431	14.1279	9.11779	6.51061	0	0	1.09149	9.91876	0.363831	4.56235	0.00423877	0.0099199

## Sheet: hypothalamus
Supplementary table S3 DEGs identified in hypothalamus between estrus group and anestrus group
DEGs	EQ1	EQ2	EQ3	QC_12	QC_13	QC_14	EQ	FQC	log2FoldChange	pvalue	padj
RESP18	1185.96	1339.44	1424.39	14623.3	15991.2	13785.4	1316.59	14800	-3.49022	5.48962e-140	1.36664e-135
HCRT	2.04124	6.47855	4.20173	7185.92	5360.26	5386.68	4.2405	5977.62	-10.4128	7.19644e-131	8.95777e-127
PTPRB	3207.8	2985.8	2557.17	217.364	204.872	209.738	2916.93	210.658	3.79153	2.52288e-123	2.09357e-119
SLC24A2	3805.89	3977.83	2986.59	18.799	31.3466	53.2018	3590.1	34.4491	6.69142	1.42971e-96	8.89816e-93
HIPK4	1314.56	1036.57	1273.12	10518	9546.14	10635.2	1208.08	10233.1	-3.08295	6.21816e-94	3.09602e-90
ECEL1	237.804	202.455	210.087	2388.65	2574.9	3318.98	216.782	2760.84	-3.67249	1.57928e-81	3.57419e-78
-	0	9.71782	8.40346	1126.77	1295.28	1012.88	6.04043	1144.98	-7.49052	1.73578e-79	3.60101e-76
LOC101108414	880.794	1146.7	977.323	9837.76	12327	9404.45	1001.61	10523.1	-3.39264	2.28375e-77	4.061e-74
LRP6	1238.01	1338.63	1185.73	117.494	97.3982	135.051	1254.12	116.648	3.42438	5.415e-77	8.42539e-74
HOOK3	857.319	862.457	757.992	82.2457	82.8445	90.0339	825.923	85.0413	3.27812	2.09559e-74	2.48427e-71
SHROOM4	849.155	919.954	710.933	18.799	15.6733	29.6702	826.68	21.3808	5.26119	1.10797e-73	1.19926e-70
SH3TC2	771.588	973.402	852.111	55.2221	59.3345	71.6178	865.7	62.0582	3.79875	1.07179e-70	9.8823e-68
BMPR2	897.124	897.279	745.387	15.2742	31.3466	33.7627	846.596	26.7945	4.97039	4.75052e-69	4.07807e-66
DOCK10	4759.14	5759.43	5033.67	605.093	498.186	689.578	5184.08	597.619	3.11639	4.17632e-68	3.46565e-65
SEMA7A	761.381	718.309	757.152	51.6973	39.1832	65.4792	745.614	52.1199	3.83333	1.53103e-64	9.52877e-62
CLMN	1449.28	1984.86	1320.18	52.8722	64.9321	86.9645	1584.78	68.2563	4.53271	2.20323e-64	1.33779e-61
FLT1	2330.07	1843.96	1436.15	83.4206	71.6493	106.404	1870.06	87.1578	4.42066	2.77964e-64	1.6476e-61
ZBTB20	598.082	657.573	558.83	30.5484	31.3466	17.3929	604.828	26.4293	4.52717	2.61572e-63	1.47996e-60
USF3	569.505	536.1	533.62	52.8722	40.3027	40.9245	546.408	44.6998	3.61565	5.54306e-63	3.06655e-60
ADGRF5	2877.12	2252.11	2122.71	279.635	313.466	294.656	2417.31	295.919	3.02964	3.23529e-62	1.71367e-59
-	446.01	447.83	476.476	14.0993	8.95616	17.3929	456.772	13.4828	5.07363	5.68556e-61	2.88861e-58
SORT1	3445.61	4253.98	3389.12	310.184	264.207	405.152	3696.23	326.514	3.49978	7.37734e-61	3.67318e-58
TMEM245	622.577	693.205	599.167	21.1489	24.6294	40.9245	638.316	28.9009	4.45266	5.73475e-59	2.69371e-56
LRIG2	637.887	656.763	501.687	43.4727	41.4222	34.7858	598.779	39.8936	3.91132	1.96875e-57	8.30711e-55
C15H11orf16	63.2783	95.5586	109.245	1030.42	1023.24	1020.04	89.3606	1024.57	-3.51214	1.48618e-55	5.69208e-53
LOC105606039	484.794	635.707	618.495	10.5744	7.83664	20.4622	579.665	12.9578	5.46494	1.13173e-54	4.20513e-52
PHC3	554.196	494.799	410.929	12.9243	10.0757	18.416	486.641	13.8053	5.12811	1.71932e-54	6.20325e-52
NFASC	6344.16	6884.27	6039.57	317.233	388.473	597.497	6422.67	434.401	3.88486	3.89629e-54	1.38569e-51
NEB	907.33	915.905	757.152	23.4988	50.3784	49.1094	860.129	40.9955	4.38392	5.76081e-54	2.01994e-51
SOGA1	986.938	1028.47	974.801	12.9243	17.9123	40.9245	996.736	23.9204	5.36376	8.69371e-54	2.96479e-51
STARD9	849.155	911.856	721.857	48.1725	79.4859	56.2712	827.622	61.3098	3.75422	8.87572e-54	2.98596e-51
IGFBPL1	59.1959	44.54	56.3032	598.043	887.779	759.149	53.3464	748.324	-3.81469	1.92255e-53	6.29762e-51
PEX5L	2355.59	2290.17	1809.27	46.9975	116.43	78.7796	2151.67	80.7357	4.73444	5.90381e-53	1.8843e-50
ALDH1L2	740.969	872.984	756.311	27.0236	19.0318	47.0632	790.088	31.0395	4.6596	8.97064e-52	2.72346e-49
ANKRD44	1547.26	1418.8	1406.74	78.7208	75.0078	137.097	1457.6	96.9419	3.90555	1.1352e-51	3.38926e-49
UBN2	377.629	436.492	357.987	10.5744	13.4342	8.1849	390.703	10.7312	5.19425	1.34858e-51	3.94975e-49
IGF1R	917.536	1049.52	895.809	96.3449	95.1592	135.051	954.29	108.852	3.12861	1.28017e-50	3.54109e-48
LOC105604044	288.835	413.007	408.408	3988.91	3260.04	4910.94	370.084	4053.3	-3.45183	1.36189e-50	3.72574e-48
RGS5	2646.46	2154.12	1873.13	25.8486	30.227	76.7334	2224.57	44.2697	5.64233	2.42861e-49	6.29794e-47
SEMA6A	1692.19	2056.94	1845.4	227.938	178.004	275.217	1864.84	227.053	3.03683	1.97367e-48	4.91345e-46
SORL1	2083.08	1788.89	1918.51	229.113	185.84	292.61	1930.16	235.854	3.03107	2.07561e-48	5.11608e-46
MMRN2	756.278	624.37	589.923	74.0211	86.203	81.849	656.857	80.691	3.02331	3.58484e-48	8.58121e-46
RAPGEF5	11661.6	16756.8	14606.1	1194.91	1827.06	1451.8	14341.5	1491.25	3.26556	4.55045e-48	1.06871e-45
FOXN2	517.454	744.223	564.713	19.9739	34.7051	35.8089	608.796	30.1627	4.3286	1.27696e-47	2.97103e-45
-	570.526	860.837	663.033	2.34988	15.6733	14.3236	698.132	10.7822	5.99843	1.53613e-47	3.54091e-45
-	47.9691	94.7488	77.3118	1111.49	1353.5	991.396	73.3432	1152.13	-3.96581	6.70592e-47	1.46442e-44
PLA2R1	1824.87	2961.51	1899.18	135.118	85.0835	146.305	2228.52	122.169	4.18849	7.79071e-47	1.68652e-44
CCK	38.7835	51.8284	49.5804	700.263	489.23	538.157	46.7308	575.883	-3.61667	9.54486e-47	2.04844e-44
NDST1	2531.13	3056.25	2745.41	227.938	151.135	294.656	2777.6	224.576	3.62737	2.05633e-45	4.26602e-43
HIVEP3	356.196	477.793	373.114	17.6241	24.6294	25.5778	402.367	22.6104	4.14815	5.98167e-45	1.2206e-42
DDR2	1424.78	1875.54	1645.4	62.2717	38.0637	101.288	1648.57	67.2078	4.6121	6.05967e-45	1.22647e-42
TPH2	3399.68	1701.43	952.112	9.3995	21.2709	16.3698	2017.74	15.6801	7.00375	1.09336e-44	2.19509e-42
ST18	1301.29	1762.97	1178.17	64.6216	61.5736	112.542	1414.14	79.5792	4.14716	1.49148e-44	2.94686e-42
LOC101112291	16362.6	15759.1	12772.4	1586.17	1360.22	2196.62	14964.7	1714.33	3.12559	3.34474e-44	6.45483e-42
HIP1	3227.2	3853.93	2661.38	311.359	300.031	438.915	3247.5	350.102	3.21245	3.65859e-44	7.0062e-42
SIX3	5.10309	1.61964	20.1683	1523.89	1411.71	1369.95	8.96368	1435.19	-7.31257	6.46417e-44	1.21913e-41
LRP1B	712.392	639.757	588.242	56.397	64.9321	87.9876	646.797	69.7723	3.20676	1.25848e-43	2.35563e-41
ZNF366	604.206	526.382	417.652	50.5223	48.1393	46.04	516.08	48.2339	3.41993	1.05119e-42	1.81732e-40
TMEM178B	634.825	1057.62	947.07	52.8722	52.6174	73.6641	879.839	59.7179	3.87813	1.56877e-42	2.67497e-40
LOC106991747	1133.91	891.61	924.381	71.6712	32.4661	69.5716	983.299	57.903	4.08489	3.97579e-42	6.51166e-40
FNDC9	72.4639	71.264	49.5804	1197.26	1032.2	2143.42	64.4361	1457.63	-4.50148	1.22874e-41	1.86521e-39
CACNB4	561.34	560.394	582.36	45.8226	62.6931	79.8027	568.031	62.7728	3.17129	4.76914e-41	6.90278e-39
NHLRC2	614.412	468.885	457.148	54.0471	61.5736	55.248	513.482	56.9563	3.1713	6.56099e-41	9.44137e-39
-	353.134	264.811	386.559	8.22457	12.3147	10.2311	334.835	10.2568	5.02524	7.3199e-41	1.04729e-38
LOC106991034	506.227	932.911	458.829	8.22457	15.6733	14.3236	632.656	12.7405	5.62754	2.40829e-40	3.3124e-38
PEAR1	891	638.947	629.419	84.5955	59.3345	64.4561	719.789	69.462	3.37491	5.63338e-40	7.70566e-38
TRPM6	260.258	276.958	277.314	21.1489	23.5099	17.3929	271.51	20.6839	3.71975	5.77454e-40	7.85558e-38
ZNF182	376.608	388.713	357.987	36.4231	36.9442	52.1787	374.436	41.8486	3.15477	2.0669e-39	2.70818e-37
LOC105602913	309.247	369.277	346.223	32.8983	39.1832	40.9245	341.582	37.6686	3.17823	2.80684e-39	3.65844e-37
CARTPT	25.5155	95.5586	84.875	3699.88	8779.27	3990.14	68.6497	5489.76	-6.31635	3.1289e-39	4.05698e-37
CP	925.701	1204.2	1331.11	96.3449	145.538	140.166	1153.67	127.35	3.17789	4.59316e-39	5.86393e-37
LOC101104046	479.691	502.087	417.652	65.7965	54.8565	42.9707	466.477	54.5412	3.10199	6.57317e-39	8.2646e-37
MOG	5384.78	7213.05	6077.38	501.698	767.991	856.345	6225.07	708.678	3.13437	1.25418e-38	1.56114e-36
-	204.124	229.988	299.163	2094.91	3005.91	1899.92	244.425	2333.58	-3.25386	1.73282e-38	2.12505e-36
-	906.309	1250.36	926.061	16.4491	27.988	55.248	1027.58	33.2284	4.93988	1.8704e-38	2.2714e-36
PCDH15	505.206	519.094	375.635	45.8226	41.4222	53.2018	466.645	46.8155	3.31436	1.9888e-38	2.40346e-36
-	3.06186	5.66873	5.04208	410.053	284.358	247.593	4.59089	314.001	-6.06931	6.69875e-38	7.68504e-36
SEMA3G	1033.89	1142.65	1042.03	90.4702	61.5736	130.958	1072.86	94.334	3.50421	3.49647e-37	3.88592e-35
CPM	475.608	558.775	539.502	32.8983	53.7369	63.4329	524.628	50.0227	3.38407	5.36294e-37	5.9338e-35
NPC1	2801.6	3484.65	3637.02	158.617	108.593	277.263	3307.75	181.491	4.18604	5.64492e-37	6.21816e-35
TEK	741.99	747.462	658.831	105.744	62.6931	61.3867	716.094	76.6081	3.2292	1.57991e-36	1.68085e-34
TMC7	4970.41	5982.94	5917.72	358.356	629.17	694.693	5623.69	560.74	3.32543	2.0103e-36	2.12061e-34
-	1770.77	1877.16	1771.45	55.2221	52.6174	136.074	1806.46	81.3045	4.46868	2.37481e-36	2.46337e-34
WSB1	4765.27	4859.72	5525.28	580.419	361.605	699.809	5050.09	547.278	3.20555	3.28251e-36	3.3491e-34
KCNJ10	1814.66	1967.05	1884.9	110.444	90.6811	205.646	1888.87	135.59	3.79719	5.78633e-36	5.80849e-34
-	269.443	261.571	244.541	25.8486	17.9123	24.5547	258.518	22.7719	3.50437	8.02433e-36	7.99063e-34
ST6GAL1	433.763	430.823	344.542	21.1489	11.1952	30.6934	403.043	21.0125	4.25191	9.63893e-36	9.5602e-34
UNC5B	1389.06	1609.92	1525.23	28.1985	27.988	84.9183	1508.07	47.0349	4.99485	1.00104e-35	9.88929e-34
P2RX7	330.68	355.51	317.651	11.7494	26.8685	27.624	334.614	22.0806	3.91038	1.07414e-35	1.05278e-33
TNS1	4076.35	5952.17	5078.21	187.99	144.418	378.551	5035.58	236.987	4.40781	1.34712e-35	1.31002e-33
PAG1	561.34	433.253	415.131	25.8486	16.7928	39.9014	469.908	27.5143	4.08499	3.22278e-35	3.05061e-33
MYRF	3611.97	4826.52	4335.35	133.943	94.0397	283.402	4257.94	170.462	4.64063	3.28153e-35	3.09446e-33
TAC3	3.06186	4.04909	1.68069	2556.66	574.314	753.01	2.93055	1294.66	-8.78543	3.39842e-35	3.19259e-33
SLC38A1	1312.52	984.739	1007.57	55.2221	64.9321	116.635	1101.61	78.9297	3.7975	3.63969e-35	3.39364e-33
EN1	391.917	946.678	1011.78	2.34988	11.1952	3.06934	783.457	5.53814	7.14832	4.24706e-35	3.90149e-33
TTC9B	126.557	123.092	150.422	1162.01	1661.37	937.171	133.357	1253.52	-3.23199	4.84539e-35	4.43478e-33
MYH11	2572.98	1947.61	2443.73	234.988	142.179	284.425	2321.44	220.531	3.39493	5.36901e-35	4.82532e-33
NKX2-1	0	4.85891	2.52104	1418.15	386.234	1096.78	2.45998	967.053	-8.54821	1.06104e-34	9.20372e-33
-	314.35	358.75	280.676	35.2481	40.3027	31.7165	317.925	35.7558	3.15498	2.33599e-34	1.96468e-32
KIAA0754	375.588	322.308	228.574	3.52481	6.71712	7.16178	308.823	5.80124	5.71899	2.4268e-34	2.03418e-32
-	248.01	242.136	233.616	8.22457	2.23904	10.2311	241.254	6.89824	5.11489	2.43833e-34	2.03698e-32
PDE8A	1064.51	1394.51	927.742	93.995	105.235	153.467	1128.92	117.566	3.26058	2.90287e-34	2.4089e-32
LOC105616742	2639.32	2945.31	2862.22	65.7965	91.8006	202.576	2815.62	120.058	4.54818	3.12577e-34	2.58525e-32
HMBOX1	418.454	382.234	375.635	28.1985	17.9123	41.9476	392.108	29.3528	3.73086	4.09077e-34	3.37217e-32
ZNF236	425.598	344.983	348.744	18.799	31.3466	38.8783	373.108	29.6746	3.64167	4.55604e-34	3.73101e-32
LOC106991533	460.299	410.578	409.249	28.1985	13.4342	37.8551	426.708	26.496	4.00196	7.03943e-34	5.70836e-32
-	345.99	449.449	270.591	1.17494	4.47808	6.13867	355.343	3.93056	6.46621	7.7167e-34	6.23725e-32
KIAA0226L	980.814	651.904	841.186	92.8201	72.7688	114.589	824.635	93.3925	3.13969	1.33351e-33	1.05056e-31
CNPY1	705.247	1325.67	1427.75	1.17494	0	3.06934	1152.89	1.41476	9.6214	1.40638e-33	1.10447e-31
LOC105608127	350.072	316.639	229.414	4.69975	7.83664	13.3005	298.709	8.61228	5.09294	1.49046e-33	1.16682e-31
LOC105615642	44.9072	37.2516	39.4963	446.476	439.971	298.749	40.5517	395.065	-3.28743	1.64833e-33	1.27836e-31
UGT8	7823.04	12310	11234.6	179.766	219.426	567.827	10455.9	322.34	5.01846	2.1075e-33	1.61933e-31
TANC2	1273.73	1255.22	1021.86	86.9454	64.9321	143.236	1183.6	98.3711	3.58518	3.9062e-33	2.93791e-31
BBX	2118.8	2173.55	2022.71	178.591	133.223	288.518	2105.02	200.11	3.39303	4.01326e-33	3.00934e-31
C11H17orf97	18.3711	23.4847	40.3366	633.292	729.927	396.967	27.3975	586.729	-4.41201	4.53391e-33	3.3693e-31
POMC	95.9381	218.651	390.761	7962.55	17758.9	9964.09	235.117	11895.2	-5.65955	5.05796e-33	3.73643e-31
ABCA2	6578.91	8269.06	7024.45	281.985	203.753	590.336	7290.81	358.691	4.34426	1.41872e-32	1.00912e-30
ISLR2	36.7423	71.264	91.5977	786.033	862.03	959.679	66.5347	869.248	-3.70011	4.19493e-32	2.88488e-30
SLC18A2	1348.24	2992.28	3415.17	97.5198	35.8246	89.0107	2585.23	74.1184	5.12435	4.31712e-32	2.96074e-30
ROPN1L	62.2577	55.0677	97.4801	815.407	783.664	578.058	71.6018	725.71	-3.33931	4.72913e-32	3.22552e-30
FAM135A	883.856	924.003	829.422	61.0968	55.976	116.635	879.093	77.9025	3.49099	5.79166e-32	3.91802e-30
ACER2	584.814	631.658	357.147	44.6476	35.8246	46.04	524.54	42.1708	3.63569	7.906e-32	5.29086e-30
CSMD2	651.155	737.745	636.982	12.9243	14.5538	43.9938	675.294	23.824	4.81014	9.24126e-32	6.15136e-30
KSR1	464.381	625.18	570.595	57.572	55.976	86.9645	553.385	66.8375	3.04551	9.8928e-32	6.55004e-30
PODXL	1240.05	1012.27	675.638	34.0732	8.95616	38.8783	975.988	27.3025	5.15651	2.69716e-31	1.74859e-29
LOC105616355	1010.41	907.806	675.638	21.1489	27.988	63.4329	864.619	37.5233	4.5166	2.9678e-31	1.90913e-29
MDM4	289.856	333.645	252.944	16.4491	25.749	30.6934	292.148	24.2971	3.57858	5.15879e-31	3.22684e-29
NYAP2	243.928	270.479	281.516	16.4491	17.9123	30.6934	265.308	21.6849	3.60083	8.80707e-31	5.37382e-29
JAKMIP3	754.237	773.377	524.376	11.7494	14.5538	40.9245	683.997	22.4092	4.91716	1.10764e-30	6.67666e-29
-	189.835	241.326	263.028	7.04963	2.23904	7.16178	231.396	5.48348	5.39484	1.21975e-30	7.31702e-29
SEC14L5	964.484	982.31	599.167	76.371	80.6054	42.9707	848.654	66.649	3.67415	1.26821e-30	7.58947e-29
ABL2	407.227	452.689	443.703	32.8983	19.0318	49.1094	434.539	33.6798	3.68239	1.33016e-30	7.94109e-29
SLC45A3	984.897	1451.19	990.768	86.9454	133.223	63.4329	1142.29	94.5337	3.59701	1.5376e-30	9.13566e-29
PAPPA	232.701	329.596	312.609	5.87469	0	4.09245	291.635	3.32238	6.4629	1.56875e-30	9.29859e-29
EBF1	186.773	205.694	211.767	8.22457	3.35856	10.2311	201.411	7.27141	4.7811	1.65077e-30	9.76152e-29
C1H1orf194	21.433	18.6258	13.4455	253.787	381.756	233.27	17.8348	289.604	-4.02914	1.71691e-30	1.01046e-28
PTAR1	196.979	217.031	169.75	10.5744	10.0757	9.20801	194.587	9.95271	4.29264	2.35968e-30	1.36933e-28
CRYBG3	986.938	1439.86	929.423	109.269	83.964	149.374	1118.74	114.203	3.29032	3.24742e-30	1.86278e-28
ATP8A1	3557.88	3316.21	3234.49	279.635	250.772	516.672	3369.52	349.026	3.26981	5.49043e-30	3.10646e-28
NPY	38.7835	23.4847	23.5297	1064.49	392.951	1058.92	28.5993	838.789	-4.88216	6.22584e-30	3.49869e-28
-	177.588	181.399	191.599	14.0993	14.5538	14.3236	183.529	14.3255	3.67946	9.04396e-30	5.01446e-28
LHX2	2.04124	0.809818	1.68069	821.282	414.222	365.251	1.51058	533.585	-8.49869	1.04054e-29	5.69325e-28
MT3	6424.79	4712.33	4888.29	51347.1	57974.3	29918.9	5341.81	46413.4	-3.1192	1.07289e-29	5.85737e-28
AK7	65.3196	46.9695	69.7487	825.981	1117.28	519.741	60.6793	821.001	-3.75972	1.3894e-29	7.50304e-28
SST	1677.9	672.959	499.166	24653.7	20083.1	26920.1	950.007	23885.6	-4.65267	1.47624e-29	7.92045e-28
ERBB4	1525.82	1825.33	1848.76	112.794	213.828	236.339	1733.31	187.654	3.20552	1.70194e-29	9.07274e-28
RALGPS1	1433.97	1689.28	1354.64	110.444	119.789	222.015	1492.63	150.749	3.30475	1.96376e-29	1.04017e-27
BFSP2	361.299	315.829	257.986	2747	4324.7	2125	311.705	3065.57	-3.29853	2.32959e-29	1.22871e-27
-	410.289	362.799	330.256	12.9243	22.3904	36.832	367.781	24.0489	3.9204	2.36149e-29	1.2429e-27
ARHGAP36	240.866	296.394	200.843	3048.96	2055.44	4998.93	246.034	3367.78	-3.77472	2.72531e-29	1.43136e-27
DCC	1145.13	1327.29	1364.72	109.269	94.0397	194.391	1279.05	132.567	3.26734	2.76216e-29	1.44766e-27
ANKRD52	1012.45	1015.51	1046.23	48.1725	30.227	96.1725	1024.73	58.1907	4.13269	2.7691e-29	1.44825e-27
HSPG2	1158.4	1330.53	1184.05	105.744	135.462	210.761	1224.33	150.656	3.01961	4.13694e-29	2.12349e-27
LAMC3	564.402	464.026	597.486	79.8958	42.5418	70.5947	541.971	64.3441	3.07454	4.30849e-29	2.20699e-27
TNR	2247.4	2278.83	1801.7	28.1985	19.0318	95.1494	2109.31	47.4599	5.46736	6.73268e-29	3.39292e-27
KCNA2	545.01	315.019	299.163	18.799	8.95616	20.4622	386.398	16.0725	4.58285	7.28475e-29	3.66372e-27
-	309.247	595.217	921.019	15.2742	16.7928	6.13867	608.494	12.7352	5.58937	7.98237e-29	4.00647e-27
TP53INP1	487.856	401.67	331.937	34.0732	53.7369	50.1325	407.154	45.9809	3.14207	9.46635e-29	4.69452e-27
TET1	258.216	305.302	284.037	14.0993	19.0318	32.7396	282.518	21.9569	3.67187	1.73597e-28	8.4739e-27
YEATS2	1059.4	1260.08	1186.57	88.1203	82.8445	172.906	1168.68	114.624	3.34637	3.11002e-28	1.49179e-26
FAM159B	8.16495	8.09818	10.0842	157.442	136.581	156.536	8.78243	150.186	-4.09262	3.18155e-28	1.51733e-26
ARAP2	4718.32	5344.8	4269.8	135.118	111.952	367.297	4777.64	204.789	4.54231	3.80806e-28	1.80575e-26
LOC101102982	11.2268	1.61964	4.20173	1398.18	581.031	361.159	5.68272	780.122	-7.14504	4.17051e-28	1.96266e-26
LRRC58	284.753	386.283	277.314	3.52481	7.83664	18.416	316.117	9.92582	4.96545	4.26506e-28	2.00337e-26
CTNNA3	363.34	583.879	347.063	42.2978	41.4222	42.9707	431.427	42.2302	3.35333	4.68197e-28	2.19093e-26
DDN	53.0722	24.2946	28.5718	682.639	519.457	1201.13	35.3128	801.077	-4.51416	4.76131e-28	2.22388e-26
-	187.794	212.982	204.204	3.52481	3.35856	3.06934	201.66	3.31757	5.93058	5.26024e-28	2.45231e-26
LOC105611819	191.876	182.209	234.457	16.4491	10.0757	16.3698	202.847	14.2982	3.82501	5.36574e-28	2.49216e-26
LOC105616111	518.474	595.217	604.209	36.4231	21.2709	62.4098	572.633	40.0346	3.83145	6.16244e-28	2.84627e-26
LOC106990835	210.247	251.854	162.187	5.87469	4.47808	5.11556	208.096	5.15611	5.33771	6.17555e-28	2.84704e-26
PRL	590.938	1303	803.371	16135.4	83470.3	37732.4	899.102	45779.4	-5.66986	6.28392e-28	2.89165e-26
SLC6A12	613.392	499.658	524.376	43.4727	14.5538	45.0169	545.809	34.3478	3.9878	6.32425e-28	2.90484e-26
SYNJ2	727.701	673.769	614.293	14.0993	44.7808	52.1787	671.921	37.0196	4.17386	9.69193e-28	4.39491e-26
FBXO30	270.464	280.197	293.281	16.4491	29.1075	36.832	281.314	27.4629	3.34576	1.06428e-27	4.79119e-26
-	465.402	1998.63	2594.15	18.799	25.749	33.7627	1686.06	26.1036	6.0101	1.14707e-27	5.12681e-26
-	233.722	328.786	331.937	23.4988	36.9442	27.624	298.148	29.3556	3.34472	1.25405e-27	5.5452e-26
-	1546.24	1895.78	1953.8	72.8462	58.215	171.883	1798.61	100.981	4.15119	1.32659e-27	5.85559e-26
LOC101106609	302.103	379.805	356.307	8.22457	4.47808	22.5085	346.072	11.737	4.85958	1.41491e-27	6.21239e-26
MYO1D	833.845	1064.91	1059.68	64.6216	60.4541	131.981	986.144	85.6857	3.52036	1.61043e-27	7.0584e-26
-	2600.54	2128.2	1984.06	247.912	111.952	257.824	2237.6	205.896	3.44146	2.54919e-27	1.09986e-25
LOC105602103	195.959	220.271	198.322	0	5.5976	4.09245	204.85	3.23002	5.95771	3.59852e-27	1.53927e-25
RGS8	983.876	945.058	1027.74	54.0471	31.3466	101.288	985.559	62.2273	3.98038	3.91727e-27	1.66702e-25
IGSF9B	255.155	178.16	200.002	15.2742	6.71712	12.2773	211.106	11.4229	4.20925	6.01944e-27	2.5228e-25
LRRC32	240.866	213.792	165.548	7.04963	2.23904	9.20801	206.735	6.16556	5.0533	6.08628e-27	2.54225e-25
LOC101116390	204.124	237.277	191.599	27.0236	22.3904	24.5547	211	24.6562	3.09911	6.79337e-27	2.81707e-25
ABCC9	681.773	425.964	435.299	70.4963	62.6931	58.3174	514.346	63.8356	3.01074	6.8008e-27	2.81707e-25
LOC106991588	11.2268	15.3866	29.4121	434.727	579.911	283.402	18.6752	432.68	-4.52288	7.14056e-27	2.948e-25
RIBC2	3.06186	7.28837	12.6052	245.562	434.374	220.992	7.6518	300.309	-5.26715	7.41436e-27	3.04588e-25
RREB1	306.186	222.7	247.902	28.1985	21.2709	32.7396	258.929	27.403	3.23499	7.58868e-27	3.10724e-25
LGI3	1151.26	1399.37	1278.17	82.2457	68.2907	167.79	1276.26	106.109	3.58478	9.63015e-27	3.92377e-25
WDR38	37.7629	40.4909	42.0173	462.926	793.74	355.02	40.0904	537.228	-3.74264	1.38924e-26	5.56119e-25
SH2B3	351.093	336.075	288.239	36.4231	26.8685	51.1556	325.135	38.1491	3.08473	1.38946e-26	5.56119e-25
PMCH	8.16495	13.7669	12.6052	10117.4	1298.64	9629.53	11.5124	7015.19	-9.247	1.48155e-26	5.91077e-25
PDPK1	501.124	446.21	435.299	41.1228	33.5856	71.6178	460.878	48.7754	3.23288	1.52376e-26	6.06944e-25
LPCAT2	430.701	669.72	538.662	24.6737	30.227	59.3405	546.361	38.0804	3.83458	1.54362e-26	6.13874e-25
LOC101109964	180.649	233.228	177.313	11.7494	17.9123	16.3698	197.063	15.3438	3.67891	1.90506e-26	7.51607e-25
TRMT13	551.134	553.106	443.703	25.8486	15.6733	51.1556	515.981	30.8925	4.05262	2.52572e-26	9.82464e-25
RBMS3	259.237	195.976	221.011	19.9739	12.3147	24.5547	225.408	18.9478	3.56509	4.21346e-26	1.6088e-24
SLCO1A2	502.144	571.732	331.937	24.6737	5.5976	23.5316	468.604	17.9343	4.7059	4.33522e-26	1.65276e-24
PDYN	216.371	161.964	87.396	2099.61	1651.29	3226.9	155.244	2325.93	-3.90742	4.51514e-26	1.7161e-24
-	85.7319	80.9818	65.547	858.88	1013.17	483.932	77.4203	785.326	-3.34354	4.72892e-26	1.78799e-24
MYBPH	3932.44	4931.79	4822.75	340.732	287.717	668.092	4562.33	432.18	3.39916	5.16581e-26	1.93971e-24
LOC105605995	173.505	263.191	235.297	7.04963	3.35856	13.3005	223.998	7.90288	4.80586	8.49525e-26	3.11472e-24
DGKH	281.691	293.964	217.65	21.1489	11.1952	27.624	264.435	19.9894	3.71825	1.10497e-25	4.02166e-24
-	1374.77	1437.43	1240.35	66.9715	58.215	158.582	1350.85	94.5896	3.83198	1.15862e-25	4.19852e-24
AGL	790.979	652.714	686.563	35.2481	19.0318	68.5485	710.085	40.9428	4.10925	1.38854e-25	4.98811e-24
GXYLT1	166.361	188.688	159.666	16.4491	11.1952	16.3698	171.571	14.6714	3.54679	1.47052e-25	5.26741e-24
-	439.887	529.621	419.333	17.6241	14.5538	45.0169	462.947	25.7316	4.15695	1.64339e-25	5.83626e-24
DAO	1458.46	964.494	670.596	63.4466	38.0637	89.0107	1031.18	63.507	4.01831	1.68128e-25	5.96232e-24
DOK6	507.247	351.461	432.778	22.3238	22.3904	50.1325	430.496	31.6156	3.75668	1.87504e-25	6.62116e-24
-	314.35	317.449	328.575	0	6.71712	15.3467	320.125	7.3546	5.40581	2.54706e-25	8.88082e-24
STXBP5L	326.598	248.614	219.33	16.4491	16.7928	29.6702	264.847	20.9707	3.64692	2.60188e-25	9.05928e-24
CFAP161	17.3505	24.2946	27.7314	347.782	619.094	268.055	23.1255	411.644	-4.14646	2.69875e-25	9.38345e-24
ADAMTS4	967.546	1477.92	1454.64	88.1203	104.115	185.183	1300.03	125.806	3.36656	3.01841e-25	1.04656e-23
IMPG2	207.186	198.406	158.825	12.9243	5.5976	14.3236	188.139	10.9485	4.09652	3.20203e-25	1.10561e-23
ITGA1	501.124	391.952	272.272	16.4491	2.23904	15.3467	388.449	11.345	5.09504	4.54754e-25	1.54871e-23
CPLX2	1997.35	2739.62	2875.66	150.392	190.318	357.066	2537.54	232.592	3.44588	7.51522e-25	2.49123e-23
LOC105604630	378.649	408.148	373.954	32.8983	36.9442	66.5023	386.917	45.4482	3.08146	7.8059e-25	2.58415e-23
ATP7A	349.052	375.756	307.567	4.69975	3.35856	20.4622	344.125	9.50685	5.14849	9.04381e-25	2.97812e-23
CDKL5	281.691	338.504	281.516	7.04963	3.35856	20.4622	300.57	10.2901	4.84387	1.07758e-24	3.50672e-23
LOC105605480	245.969	298.013	270.591	2.34988	7.83664	18.416	271.525	9.53418	4.80172	1.16331e-24	3.77093e-23
PPP1R32	12.2474	7.28837	19.328	467.625	828.445	246.57	12.9546	514.213	-5.31128	1.319e-24	4.23697e-23
ASTN1	1596.25	1512.74	1228.59	72.8462	48.1393	155.513	1445.86	92.1662	3.96795	2.14945e-24	6.78207e-23
ARHGAP42	245.969	252.663	259.667	15.2742	12.3147	31.7165	252.766	19.7685	3.66214	2.15823e-24	6.79255e-23
PLEKHH1	10470.5	12476.1	11582.5	741.386	1599.79	612.844	11509.7	984.675	3.54719	2.51695e-24	7.8817e-23
-	300.062	209.743	205.885	28.1985	17.9123	19.4391	238.563	21.85	3.45248	2.55306e-24	7.97472e-23
SLC6A4	2068.79	1098.11	766.396	0	0	0	1311.1	0	12.6561	3.1524e-24	9.76106e-23
DRC3	34.701	57.4971	43.698	660.315	1911.02	675.254	45.2987	1082.2	-4.57491	3.81918e-24	1.17236e-22
ARHGAP23	5875.7	6856.73	5692.5	203.264	152.255	551.457	6141.65	302.325	4.3433	3.97238e-24	1.21639e-22
LOC105611327	153.093	174.111	127.733	4.69975	6.71712	7.16178	151.645	6.19288	4.60481	5.03424e-24	1.52652e-22
NRN1L	30.6186	21.8651	18.4876	278.46	548.565	274.194	23.6571	367.073	-3.96417	6.68496e-24	2.00993e-22
LCORL	189.835	239.706	198.322	11.7494	15.6733	25.5778	209.288	17.6668	3.55303	6.80539e-24	2.04121e-22
LOC101121333	143.907	152.246	177.313	11.7494	6.71712	13.3005	157.822	10.589	3.89269	7.69097e-24	2.29301e-22
SHE	334.763	325.547	282.356	46.9975	20.1514	36.832	314.222	34.6603	3.18223	7.82567e-24	2.33038e-22
ZCCHC24	230.66	275.338	245.381	15.2742	14.5538	32.7396	250.46	20.8558	3.5726	8.10685e-24	2.41123e-22
MCC	368.443	391.142	435.299	34.0732	42.5418	70.5947	398.295	49.0699	3.01346	8.40884e-24	2.49509e-22
PAQR5	367.423	302.062	243.7	12.9243	13.4342	31.7165	304.395	19.3583	3.95993	9.08298e-24	2.68233e-22
GRIN2B	169.423	187.878	157.145	17.6241	21.2709	13.3005	171.482	17.3985	3.30758	1.09931e-23	3.21967e-22
LOC101106541	7.14433	5.66873	25.2104	634.466	1258.34	386.736	12.6745	759.848	-5.89773	1.33941e-23	3.8818e-22
GH	93.8969	167.632	120.169	1528.59	7066.41	2873.92	127.233	3822.97	-4.90796	3.14412e-23	8.8145e-22
LOC101108953	193.918	150.626	173.111	16.4491	15.6733	21.4854	172.552	17.8693	3.26388	3.73969e-23	1.03559e-21
-	368.443	321.498	276.474	9.3995	4.47808	24.5547	322.138	12.8108	4.63248	3.92515e-23	1.08469e-21
-	505.206	431.633	376.475	17.6241	27.988	53.2018	437.771	32.938	3.72147	3.99169e-23	1.10157e-21
PADI2	1669.73	1852.05	2130.28	43.4727	12.3147	96.1725	1884.02	50.6533	5.21277	4.03792e-23	1.11199e-21
LOC105615264	27.5567	17.816	11.7648	264.361	291.075	186.206	19.0458	247.214	-3.71424	4.05973e-23	1.11621e-21
UGGT1	1040.01	958.825	852.111	32.8983	34.7051	101.288	950.315	56.2972	4.07072	5.15276e-23	1.40194e-21
ZBTB7A	679.732	528.002	573.116	56.397	29.1075	80.8258	593.617	55.4435	3.41617	5.21893e-23	1.41685e-21
SETD1B	387.835	439.731	399.164	35.2481	22.3904	60.3636	408.91	39.334	3.37089	7.54888e-23	2.01425e-21
ISL1	0	0	2.52104	580.419	267.565	608.752	0.840346	485.579	-9.1121	8.00869e-23	2.12781e-21
TENM4	720.557	674.579	653.789	22.3238	11.1952	56.2712	682.975	29.9301	4.5027	8.41372e-23	2.22593e-21
TSGA10IP	27.5567	20.2455	15.9666	309.009	174.645	314.095	21.2562	265.916	-3.65545	9.18839e-23	2.42315e-21
-	254.134	180.59	168.91	2.34988	1.11952	9.20801	201.211	4.2258	5.52845	9.29622e-23	2.44899e-21
-	79.6082	68.0247	81.5136	848.305	1113.92	451.192	76.3822	804.473	-3.39715	9.98003e-23	2.62081e-21
-	309.247	467.265	295.802	25.8486	11.1952	33.7627	357.438	23.6022	3.91568	1.07386e-22	2.81112e-21
-	239.845	287.486	218.49	3.52481	20.1514	8.1849	248.607	10.6204	4.54635	1.09004e-22	2.85049e-21
-	3.06186	1.61964	0	175.066	180.243	163.698	1.5605	173.002	-6.87333	1.12455e-22	2.93455e-21
-	225.557	248.614	220.171	24.6737	13.4342	32.7396	231.447	23.6158	3.28601	1.14405e-22	2.97887e-21
CSMD1	933.866	1054.38	908.414	74.0211	39.1832	124.82	965.555	79.3413	3.60181	1.29369e-22	3.34438e-21
EBF2	220.454	169.252	189.918	14.0993	4.47808	16.3698	193.208	11.649	4.0438	1.30795e-22	3.37424e-21
NIPA1	1069.61	1358.07	1239.51	37.598	73.8883	136.074	1222.39	82.5201	3.88443	1.51765e-22	3.88703e-21
FA2H	1259.44	1981.63	2051.28	198.565	133.223	280.333	1764.12	204.04	3.11106	1.60741e-22	4.10004e-21
NCOR2	4251.9	4258.03	3689.96	350.131	227.263	627.168	4066.63	401.521	3.33942	1.99954e-22	5.06395e-21
LOC101123026	232.701	189.498	163.867	17.6241	22.3904	25.5778	195.355	21.8641	3.15185	3.50538e-22	8.72663e-21
MKRN3	123.495	223.51	167.229	7.04963	3.35856	6.13867	171.411	5.51562	4.9606	3.52358e-22	8.76318e-21
EN2	283.732	653.523	906.733	1.17494	1.11952	1.02311	614.663	1.10586	9.12317	3.86811e-22	9.56273e-21
LENG8	5309.26	5999.94	5261.41	301.959	165.689	614.89	5523.54	360.846	3.93529	4.31214e-22	1.06183e-20
LOC101108756	120.433	124.712	145.38	9.3995	7.83664	7.16178	130.175	8.13264	4.00768	4.99055e-22	1.22043e-20
RNF144A	811.392	906.187	813.455	77.5459	62.6931	149.374	843.678	96.5378	3.12369	6.73122e-22	1.62851e-20
MED12L	412.33	261.571	261.348	27.0236	22.3904	40.9245	311.75	30.1128	3.3644	6.96853e-22	1.67777e-20
GFOD1	1126.76	987.978	1033.63	35.2481	31.3466	108.45	1049.46	58.3482	4.16278	7.11596e-22	1.70831e-20
LOC105605488	207.186	187.878	146.22	14.0993	8.95616	19.4391	180.428	14.1648	3.66115	8.20709e-22	1.9533e-20
GUCY1A2	321.495	258.332	193.28	24.6737	24.6294	34.7858	257.702	28.0296	3.19406	8.39445e-22	1.99599e-20
SYNE3	498.062	514.235	392.442	19.9739	29.1075	60.3636	468.246	36.4817	3.67228	9.57407e-22	2.25707e-20
SLC6A3	1377.83	4646.74	8548	29.3734	10.0757	11.2542	4857.52	16.9011	8.17072	9.68781e-22	2.28172e-20
ABLIM1	1780.98	1533.8	1402.54	96.3449	136.581	253.732	1572.44	162.219	3.27429	1.02021e-21	2.39153e-20
ATXN7	181.67	160.344	152.103	9.3995	0	5.11556	164.706	4.83835	5.10247	1.08333e-21	2.52997e-20
NNAT	2321.91	4888.87	5572.33	34782.9	45979.8	32019.3	4261.04	37594	-3.1411	1.10717e-21	2.58321e-20
AVP	5.10309	1.61964	4.20173	632.117	5036.72	1922.43	3.64149	2530.42	-9.45488	1.21022e-21	2.81839e-20
-	344.969	306.111	292.44	35.2481	25.749	56.2712	314.507	39.0894	3.00068	1.21492e-21	2.82669e-20
CMTM4	161.258	192.737	174.792	14.0993	4.47808	16.3698	176.262	11.649	3.91284	1.26623e-21	2.94055e-20
TNFRSF6B	20.4124	15.3866	22.6893	262.011	378.398	169.837	19.4961	270.082	-3.79423	1.44227e-21	3.32951e-20
GHRH	2.04124	3.23927	2.52104	546.346	100.757	758.126	2.60052	468.41	-7.47961	1.44308e-21	3.32951e-20
CFAP45	32.6598	56.6873	105.043	1643.74	2193.14	749.941	64.7968	1528.94	-4.55669	1.45728e-21	3.35605e-20
NPVF	2.04124	0.809818	0	587.469	413.103	225.085	0.950352	408.552	-8.84483	1.60932e-21	3.68914e-20
SLC7A1	1054.3	851.929	680.68	49.3474	53.7369	120.727	862.303	74.6039	3.52585	1.67093e-21	3.82623e-20
LHB	11.2268	28.3436	43.698	629.767	1656.89	558.619	27.7561	948.425	-5.08631	1.67692e-21	3.82999e-20
SLC36A1	568.484	580.64	564.713	24.6737	43.6613	79.8027	571.279	49.3792	3.52454	2.46718e-21	5.55673e-20
RALGAPA2	408.247	447.83	445.383	15.2742	10.0757	42.9707	433.82	22.7735	4.2387	2.56971e-21	5.77373e-20
DOT1L	913.453	894.849	786.564	78.7208	70.5297	159.605	864.956	102.952	3.06674	2.74018e-21	6.13461e-20
LOC101119572	19.3918	8.09818	8.40346	293.734	184.721	168.813	11.9645	215.756	-4.19928	2.88853e-21	6.44355e-20
LOC105604169	123.495	114.994	144.54	3.52481	4.47808	7.16178	127.676	5.05489	4.63939	3.36287e-21	7.48155e-20
-	130.639	130.381	121.85	2.34988	3.35856	4.09245	127.623	3.26696	5.27263	4.45419e-21	9.7784e-20
B3GNTL1	156.155	144.148	138.657	16.4491	16.7928	20.4622	146.32	17.9014	3.02523	4.54735e-21	9.96535e-20
SPEN	2291.29	2235.91	2242.04	200.914	147.777	391.852	2256.41	246.848	3.1908	5.3909e-21	1.16803e-19
ATP10A	892.021	635.707	468.073	88.1203	50.3784	87.9876	665.267	75.4955	3.13835	5.77492e-21	1.24797e-19
RBP1	36.7423	42.9204	40.3366	424.153	316.824	222.015	39.9998	320.997	-3.00098	5.91975e-21	1.27705e-19
KIF13B	822.618	874.604	836.144	17.6241	13.4342	66.5023	844.456	32.5202	4.68916	6.01347e-21	1.29503e-19
CXHXorf36	172.485	201.645	143.699	9.3995	0	5.11556	172.609	4.83835	5.17029	6.44964e-21	1.38537e-19
RAD54L2	615.433	587.928	507.569	28.1985	63.8126	81.849	570.31	57.9534	3.29287	6.60501e-21	1.41751e-19
USP45	129.619	129.571	150.422	9.3995	5.5976	13.3005	136.537	9.43252	3.84407	6.78851e-21	1.45564e-19
SEL1L	1232.91	1165.33	1120.18	57.572	30.227	126.866	1172.81	71.555	4.03067	8.19919e-21	1.7461e-19
GRIK3	885.897	813.058	1024.38	21.1489	6.71712	56.2712	907.779	28.0457	5.00809	8.28491e-21	1.76284e-19
ZNF483	562.361	587.118	500.006	36.4231	6.71712	38.8783	549.828	27.3395	4.32757	8.72337e-21	1.84824e-19
SNX29	567.464	709.401	639.503	19.9739	11.1952	56.2712	638.789	29.1468	4.4443	8.80061e-21	1.86144e-19
EMILIN2	226.577	491.56	500.846	23.4988	21.2709	38.8783	406.328	27.8826	3.86046	9.16723e-21	1.93405e-19
ZNF618	175.546	178.97	154.624	3.52481	7.83664	16.3698	169.713	9.24375	4.17068	1.28727e-20	2.67501e-19
TRABD2B	108.186	132	149.582	3.52481	7.83664	7.16178	129.923	6.17441	4.38461	1.34488e-20	2.7924e-19
DPYSL5	1900.39	2920.21	2558.85	200.914	153.374	393.898	2459.82	249.396	3.30078	2.52112e-20	5.08204e-19
TP53INP2	453.155	668.91	651.268	32.8983	23.5099	73.6641	591.111	43.3574	3.76262	2.76627e-20	5.54925e-19
LOC101112306	429.68	408.148	549.586	29.3734	15.6733	56.2712	462.472	33.7726	3.768	2.83462e-20	5.67721e-19
HIF3A	510.309	492.37	469.753	35.2481	12.3147	54.2249	490.811	33.9293	3.84889	3.65924e-20	7.22417e-19
TMEM144	667.484	677.008	813.455	85.7705	110.832	39.9014	719.316	78.8348	3.19328	3.70333e-20	7.29964e-19
ELMSAN1	524.598	471.314	475.636	38.773	27.988	78.7796	490.516	48.5135	3.33096	4.16038e-20	8.1425e-19
PLN	281.691	233.228	294.121	42.2978	16.7928	32.7396	269.68	30.61	3.141	4.26893e-20	8.33529e-19
KCNJ4	11.2268	6.47855	6.72277	312.533	111.952	211.784	8.14271	212.09	-4.72041	4.51044e-20	8.79196e-19
ATXN1	368.443	294.774	295.802	57.572	26.8685	27.624	319.673	37.3548	3.10388	1.14118e-19	2.1409e-18
BAHCC1	874.67	883.512	694.966	52.8722	24.6294	98.2188	817.716	58.5735	3.79895	1.38691e-19	2.57089e-18
GAL	1.02062	0	0	898.828	434.374	762.218	0.340206	698.473	-11.1042	1.38795e-19	2.5709e-18
HCFC1	355.175	380.615	310.928	7.04963	7.83664	31.7165	348.906	15.5342	4.4702	1.43374e-19	2.65375e-18
KIAA0355	1178.81	1306.24	1094.13	93.995	53.7369	176.998	1193.06	108.243	3.45957	1.58076e-19	2.90428e-18
CECR2	323.536	531.241	278.995	3.52481	16.7928	24.5547	377.924	14.9574	4.64486	1.78576e-19	3.24736e-18
TTC25	23.4742	26.724	16.8069	145.692	220.545	176.998	22.3351	181.079	-3.02014	2.35002e-19	4.21801e-18
LOC101113077	1443.15	5166.64	4471.48	128.068	275.402	231.223	3693.76	211.564	4.12557	2.6926e-19	4.81208e-18
DENND5B	1272.71	1106.21	985.726	65.7965	60.4541	169.837	1121.55	98.6957	3.50253	2.88351e-19	5.1422e-18
LOC106991125	202.082	201.645	146.22	4.69975	2.23904	14.3236	183.316	7.08745	4.66325	2.92855e-19	5.21503e-18
NR5A1	4.08247	0	1.68069	475.85	100.757	543.272	1.92106	373.293	-7.68131	3.33381e-19	5.89037e-18
SFRP5	61.2371	55.0677	84.0346	2062.02	462.362	1341.3	66.7798	1288.56	-4.26974	3.79163e-19	6.65205e-18
PLEKHA6	1752.4	1725.72	1594.14	48.1725	26.8685	148.351	1690.75	74.4641	4.50105	3.93648e-19	6.90132e-18
LOC101103156	58.1753	51.0186	52.1015	904.702	1225.87	329.442	53.7651	820.006	-3.9316	4.33624e-19	7.55428e-18
PGAP1	577.67	664.051	711.773	19.9739	14.5538	65.4792	651.165	33.3356	4.27887	4.75715e-19	8.27019e-18
-	2.04124	0.809818	0	197.39	497.067	223.038	0.950352	305.832	-8.42567	5.14534e-19	8.93259e-18
NR1D2	614.412	591.167	612.612	58.7469	47.0198	117.658	606.064	74.4749	3.01973	5.39379e-19	9.31842e-18
GABPB2	174.526	195.976	168.91	21.1489	11.1952	27.624	179.804	19.9894	3.16229	6.12183e-19	1.05033e-17
PLCXD3	608.289	1205.01	1168.08	16.4491	20.1514	74.6872	993.793	37.0959	4.73623	6.22062e-19	1.06655e-17
FAM168A	2295.37	2370.34	2330.28	124.543	72.7688	293.633	2332	163.648	3.83098	6.84015e-19	1.16714e-17
MIF	24.4948	10.5276	17.6473	150.392	188.079	153.467	17.5566	163.979	-3.24254	7.53851e-19	1.28191e-17
FZD7	517.454	508.566	398.324	28.1985	32.4661	75.7103	474.781	45.4583	3.37673	7.93034e-19	1.34486e-17
GNRH1	1.02062	0	0	442.952	497.067	551.457	0.340206	497.159	-10.6142	8.04278e-19	1.363e-17
-	146.969	262.381	221.011	16.4491	26.8685	15.3467	210.12	19.5548	3.42966	1.06179e-18	1.77642e-17
LIMD1	423.557	372.516	363.87	21.1489	21.2709	58.3174	386.648	33.579	3.51508	1.18513e-18	1.97482e-17
LOC105603495	120.433	102.847	105.043	5.87469	4.47808	9.20801	109.441	6.52026	4.05329	1.27489e-18	2.11448e-17
CHODL	47.9691	12.9571	16.8069	458.226	326.9	481.886	25.911	422.337	-4.04546	1.58149e-18	2.59191e-17
CATIP	6.12371	6.47855	17.6473	366.581	680.668	157.559	10.0832	401.603	-5.30655	1.62739e-18	2.66538e-17
EPPK1	931.825	1545.13	672.277	112.794	36.9442	48.0863	1049.75	65.9415	3.99585	1.92904e-18	3.13469e-17
-	153.093	397.621	334.458	1.17494	0	9.20801	295.057	3.46098	6.36468	2.00919e-18	3.26068e-17
SOGA3	1924.89	2171.12	2061.37	139.818	181.362	384.69	2052.46	235.29	3.12305	2.01254e-18	3.26186e-17
DOCK3	3828.34	4066.91	3589.12	220.888	155.613	549.411	3828.12	308.638	3.63152	2.08036e-18	3.36084e-17
LOC105605404	162.278	173.301	129.413	0	0	6.13867	154.998	2.04622	6.15332	2.33e-18	3.73746e-17
PSD3	847.113	920.764	770.597	102.22	41.4222	128.912	846.158	90.8513	3.21763	2.3479e-18	3.76374e-17
-	144.928	171.682	175.632	11.7494	6.71712	21.4854	164.081	13.3173	3.609	2.60278e-18	4.15095e-17
TMC8	334.763	569.302	327.735	44.6476	25.749	57.2943	410.6	42.5636	3.26752	2.60911e-18	4.15837e-17
KLK6	7300.48	13846.3	11493.4	1039.82	1464.33	488.024	10880.1	997.392	3.44763	2.72684e-18	4.34045e-17
FAM183A	12.2474	7.28837	10.9245	258.486	259.729	100.265	10.1534	206.16	-4.35238	2.74647e-18	4.36891e-17
AFAP1	257.196	342.553	282.356	27.0236	15.6733	46.04	294.035	29.579	3.30594	2.88974e-18	4.57634e-17
LOC105612922	121.454	116.614	121.01	10.5744	16.7928	10.2311	119.692	12.5328	3.25809	2.95732e-18	4.67445e-17
NRXN1	2142.28	1829.38	1768.09	128.068	169.047	355.02	1913.25	217.379	3.13575	3.41716e-18	5.3672e-17
PLCG2	255.155	188.688	142.018	17.6241	12.3147	23.5316	195.287	17.8235	3.44603	4.06867e-18	6.3227e-17
LOC106991179	131.66	117.424	154.624	1.17494	0	6.13867	134.569	2.43787	5.72332	4.34665e-18	6.73366e-17
LOC106991003	283.732	214.602	175.632	7.04963	3.35856	19.4391	224.655	9.94911	4.47498	4.35265e-18	6.73876e-17
ZNF704	189.835	184.639	131.934	8.22457	14.5538	21.4854	168.803	14.7546	3.5009	4.79304e-18	7.37015e-17
GATAD2B	811.392	951.537	844.548	43.4727	38.0637	124.82	869.159	68.7853	3.65446	6.00146e-18	9.07693e-17
CRABP1	268.423	117.424	136.136	2596.61	1314.32	1408.83	173.994	1773.25	-3.35185	6.05683e-18	9.15512e-17
CCDC153	311.289	319.068	463.871	3360.32	5489.01	1831.37	364.743	3560.23	-3.28668	7.13438e-18	1.07123e-16
FNIP2	117.371	97.988	110.085	3.52481	2.23904	8.1849	108.481	4.64958	4.51456	9.73127e-18	1.43775e-16
TRH	71.4433	104.467	99.1608	4601.06	21576.5	4880.24	91.6902	10352.6	-6.8185	1.03668e-17	1.52892e-16
COL5A1	288.835	337.694	330.256	32.8983	12.3147	45.0169	318.928	30.0766	3.4015	1.16707e-17	1.7121e-16
LOC105603597	112.268	181.399	145.38	1.17494	10.0757	3.06934	146.349	4.77332	4.93843	1.17391e-17	1.71807e-16
LOC101115808	178.608	180.59	164.708	7.04963	8.95616	23.5316	174.635	13.1791	3.70692	1.40111e-17	2.03267e-16
KCNMA1	564.402	541.769	475.636	62.2717	33.5856	97.1956	527.269	64.351	3.0305	1.60338e-17	2.31802e-16
CHRNA6	262.299	1314.34	1810.11	39.9479	23.5099	42.9707	1128.91	35.4762	4.9915	1.84174e-17	2.62601e-16
TEKT1	58.1753	76.9328	103.363	782.509	1465.45	497.232	79.4902	915.064	-3.52266	1.85635e-17	2.64533e-16
CFAP52	12.2474	28.3436	42.8577	487.599	647.082	259.87	27.8162	464.851	-4.0529	2.08432e-17	2.96002e-16
LOC105605942	86.7526	139.289	128.573	1.17494	3.35856	5.11556	118.205	3.21635	5.17072	2.23389e-17	3.15981e-16
ACAP2	718.515	685.106	596.646	65.7965	25.749	96.1725	666.756	62.5727	3.41043	2.24931e-17	3.17643e-16
PPFIA4	724.639	502.087	459.669	29.3734	29.1075	80.8258	562.132	46.4356	3.59044	2.24947e-17	3.17643e-16
HES5	97.9794	120.663	57.9839	807.182	1109.44	509.51	92.2087	808.712	-3.13251	2.48986e-17	3.50198e-16
ITPKA	4.08247	4.04909	3.36138	110.444	73.8883	84.9183	3.83098	89.7503	-4.55277	2.52579e-17	3.5485e-16
SLC38A8	120.433	153.056	155.464	8.22457	17.9123	18.416	142.984	14.851	3.25778	2.6719e-17	3.739e-16
TRPM7	754.237	649.474	641.184	63.4466	35.8246	116.635	681.632	71.9687	3.23946	2.83304e-17	3.94009e-16
GAS7	2033.07	3338.88	2680.7	278.46	201.514	512.579	2684.22	330.851	3.01939	2.93791e-17	4.07008e-16
DLX6	0	0	0	182.115	474.676	187.229	0	281.34	-10.754	3.47364e-17	4.76979e-16
GLI3	220.454	209.743	227.734	14.0993	14.5538	36.832	219.31	21.8283	3.31465	3.83229e-17	5.24202e-16
SLC22A2	41.8454	26.724	40.3366	861.229	222.784	766.311	36.302	616.775	-4.08922	3.837e-17	5.24278e-16
-	119.412	167.632	100.001	0	5.5976	5.11556	129.015	3.57105	5.1458	4.50196e-17	6.10106e-16
-	282.711	528.811	388.24	5.87469	27.988	32.7396	399.921	22.2008	4.16229	4.81536e-17	6.49043e-16
ROPN1	1.02062	3.23927	10.0842	222.063	315.705	109.473	4.78135	215.747	-5.46436	5.2771e-17	7.0745e-16
NDRG1	3672.19	3981.88	4841.23	395.954	244.055	758.126	4165.1	466.045	3.15915	5.38555e-17	7.21212e-16
KANK4	254.134	251.044	362.189	25.8486	14.5538	43.9938	289.122	28.1321	3.35411	5.69913e-17	7.59528e-16
NRXN3	1639.11	1634.21	1717.67	58.7469	89.5616	236.339	1663.66	128.216	3.69485	6.55188e-17	8.66679e-16
LOC106990316	111.247	111.755	106.724	3.52481	0	7.16178	109.909	3.5622	4.91367	7.16136e-17	9.45292e-16
-	180.649	113.375	152.103	4.69975	1.11952	11.2542	148.709	5.69117	4.67899	7.3256e-17	9.65436e-16
FAM132A	15.3093	21.8651	18.4876	159.792	275.402	136.074	18.554	190.422	-3.35212	7.60965e-17	9.99695e-16
ARID4B	1094.1	1111.88	1084.89	79.8958	40.3027	163.698	1096.96	94.6321	3.53207	8.81085e-17	1.15082e-15
-	150.031	268.05	104.203	1.17494	7.83664	5.11556	174.095	4.70905	5.19665	9.92323e-17	1.28935e-15
BVES	135.742	230.798	229.414	22.3238	30.227	19.4391	198.652	23.9967	3.05381	1.19921e-16	1.54047e-15
C15H11orf42	131.66	110.945	124.371	3.52481	4.47808	13.3005	122.325	7.10112	4.07562	1.22131e-16	1.56598e-15
FAM213B	931.825	1139.41	991.608	7014.38	13181.2	4413.71	1020.95	8203.1	-3.00614	2.02184e-16	2.53315e-15
BSN	1056.34	1060.05	1089.93	24.6737	17.9123	103.334	1068.77	48.6401	4.45165	2.10083e-16	2.62815e-15
MAGI2	1714.64	1907.93	1952.12	168.016	120.908	364.228	1858.23	217.717	3.0918	2.14662e-16	2.68139e-15
SYT1	5334.77	5791.01	6934.54	205.614	143.299	693.67	6020.11	347.528	4.1137	2.36181e-16	2.92815e-15
N4BP1	750.155	791.193	747.908	75.196	45.9003	145.282	763.085	88.7927	3.09987	2.38675e-16	2.95613e-15
LOC105606312	401.103	656.763	702.529	17.6241	8.95616	54.2249	586.798	26.9351	4.43654	2.41478e-16	2.98936e-15
LOC101107770	2.04124	0.809818	1.68069	104.569	79.4859	145.282	1.51058	109.779	-6.21909	2.47989e-16	3.06386e-15
DLX5	1.02062	1.61964	0	124.543	190.318	130.958	0.880085	148.607	-7.39818	2.9096e-16	3.55768e-15
MYCT1	105.124	96.3684	94.9591	0	3.35856	4.09245	98.8171	2.48367	5.27096	3.12512e-16	3.81371e-15
-	113.289	172.491	110.085	0	4.47808	1.02311	131.955	1.83373	6.16763	3.28069e-16	3.98987e-15
-	203.103	191.927	209.246	12.9243	15.6733	35.8089	201.425	21.4688	3.21559	3.33789e-16	4.05153e-15
TMED8	210.247	282.627	273.112	12.9243	11.1952	36.832	255.329	20.3172	3.63837	3.62401e-16	4.37323e-15
LOC105605616	657.278	576.591	508.409	43.4727	35.8246	105.381	580.759	61.5593	3.23225	3.76653e-16	4.53862e-15
LOC101111293	96.9588	86.6506	91.5977	5.87469	6.71712	9.20801	91.7357	7.26661	3.64606	3.97547e-16	4.7696e-15
KRT3	23.4742	9.71782	15.1262	119.844	145.538	154.49	16.1061	139.957	-3.14143	4.12249e-16	4.94362e-15
-	527.66	351.461	326.895	19.9739	17.9123	56.2712	402.005	31.3858	3.66944	4.51596e-16	5.38433e-15
SPAG6	3.06186	2.42946	6.72277	117.494	222.784	80.8258	4.07136	140.368	-5.09817	4.54056e-16	5.40848e-15
LOC101117707	90.835	80.172	103.363	5.87469	4.47808	7.16178	91.4565	5.83818	3.96228	4.85084e-16	5.75604e-15
SLC1A2	3681.37	2139.54	1689.1	56.397	98.5177	261.917	2503.34	138.944	4.16908	4.94443e-16	5.8615e-15
LOC101112115	322.515	230.798	199.162	11.7494	11.1952	33.7627	250.825	18.9024	3.71549	5.45357e-16	6.42834e-15
-	267.402	154.675	141.178	14.0993	3.35856	14.3236	187.752	10.5938	4.14277	5.50871e-16	6.49026e-15
FEZF1	0	0	0	198.565	108.593	358.089	0	221.749	-10.4115	5.74513e-16	6.74965e-15
LOC105616503	145.948	110.135	89.917	0	2.23904	5.11556	115.334	2.45153	5.49932	6.00797e-16	7.03851e-15
-	165.34	302.872	131.094	12.9243	17.9123	7.16178	199.769	12.6661	3.98787	6.83827e-16	7.96252e-15
TNRC6C	804.247	738.554	615.974	30.5484	21.2709	94.1263	719.592	48.6485	3.88045	6.86521e-16	7.99016e-15
-	475.608	393.572	333.617	3650.53	4920.29	1583.78	400.932	3384.87	-3.07798	7.28025e-16	8.46134e-15
SPC24	8.16495	8.09818	7.56311	76.371	82.8445	104.357	7.94208	87.8576	-3.4706	7.31521e-16	8.49404e-15
LOC101114926	12.2474	17.816	5.88242	233.813	195.916	110.496	11.9819	180.075	-3.90628	7.73259e-16	8.94115e-15
DAB2IP	1592.16	1485.21	1387.41	102.22	80.6054	266.009	1488.26	149.611	3.31193	8.82916e-16	1.01854e-14
-	111.247	110.135	77.3118	3.52481	5.5976	8.1849	99.5649	5.7691	4.08984	8.92634e-16	1.02928e-14
LOC105602964	9.18557	4.04909	5.88242	110.444	77.2469	84.9183	6.37236	90.8698	-3.86222	1.01283e-15	1.16035e-14
KSR2	138.804	120.663	106.724	5.87469	1.11952	11.2542	122.064	6.08281	4.30305	1.01908e-15	1.16697e-14
LOC105605515	1416.62	1472.25	1051.27	69.3213	45.9003	189.276	1313.38	101.499	3.69071	1.40204e-15	1.5815e-14
PLAG1	141.866	142.528	97.4801	0	1.11952	3.06934	127.291	1.39629	6.44366	1.50665e-15	1.69643e-14
SIX6	0	0	0.840346	321.933	231.741	223.038	0.280115	258.904	-9.67167	1.6968e-15	1.90108e-14
LOC105612255	737.907	724.787	605.049	101.045	38.0637	118.681	689.248	85.9298	3.0023	1.84337e-15	2.05788e-14
LOC105604154	189.835	194.356	205.044	2031.47	3180.56	817.467	196.412	2009.83	-3.3549	1.93463e-15	2.153e-14
ABTB2	754.237	867.316	747.908	74.0211	40.3027	143.236	789.82	85.8532	3.19834	1.95297e-15	2.1705e-14
LOC105609418	0	0.809818	0.840346	160.966	377.278	222.015	0.550055	253.42	-8.75934	2.01294e-15	2.23415e-14
-	186.773	314.21	218.49	12.9243	34.7051	12.2773	239.824	19.9689	3.58958	2.02981e-15	2.25087e-14
LOC105605699	200.041	135.24	166.389	2.34988	0	11.2542	167.223	4.5347	5.16213	2.08418e-15	2.30882e-14
LOC105613322	112.268	105.276	126.892	8.22457	7.83664	17.3929	114.812	11.1514	3.347	2.11506e-15	2.3402e-14
ZC3H11A	4353.96	4245.88	3803.41	273.761	122.028	589.313	4134.41	328.367	3.65348	2.23485e-15	2.46616e-14
-	272.505	222.7	255.465	17.6241	19.0318	47.0632	250.223	27.9064	3.15288	2.26849e-15	2.49885e-14
-	105.124	114.184	96.6398	3.52481	10.0757	12.2773	105.316	8.62595	3.59067	2.62483e-15	2.87484e-14
EFR3B	997.144	1115.93	1071.44	56.397	26.8685	141.189	1061.51	74.8183	3.82298	2.68414e-15	2.93592e-14
SYDE2	81.6495	121.473	112.606	8.22457	7.83664	12.2773	105.243	9.44618	3.47063	2.94101e-15	3.19304e-14
FAM53B	440.907	528.811	588.242	39.9479	35.8246	100.265	519.32	58.6792	3.1402	3.00109e-15	3.25401e-14
FEV	336.804	129.571	96.6398	5.87469	6.71712	3.06934	187.672	5.22038	5.17672	3.13702e-15	3.39253e-14
-	0	0	0	170.366	109.713	125.843	0	135.307	-9.69729	3.65434e-15	3.92133e-14
KRT5	3.06186	2.42946	3.36138	77.5459	63.8126	69.5716	2.9509	70.31	-4.57924	4.51647e-15	4.78661e-14
CACNA1A	1904.47	1390.46	1581.53	156.267	73.8883	279.31	1625.49	169.822	3.25721	4.58209e-15	4.84996e-14
NAV2	876.711	773.377	800.009	12.9243	8.95616	69.5716	816.699	30.484	4.73495	4.85326e-15	5.11091e-14
-	8.16495	7.28837	13.4455	121.019	78.3664	135.051	9.63295	111.479	-3.52844	4.95207e-15	5.20176e-14
ANKRD11	2717.91	2617.33	2400.87	209.139	165.689	520.764	2578.7	298.531	3.10944	5.01076e-15	5.26119e-14
PRRC2B	4784.66	4292.85	4188.28	211.489	124.267	612.844	4421.93	316.2	3.80479	5.19001e-15	5.43793e-14
GIGYF1	1015.52	979.07	884.884	50.5223	38.0637	151.421	959.823	80.0022	3.58058	5.84157e-15	6.08731e-14
-	450.093	447.83	363.87	49.3474	12.3147	53.2018	420.597	38.288	3.45559	6.67304e-15	6.919e-14
TMPPE	128.598	127.141	134.455	5.87469	0	11.2542	130.065	5.70964	4.48603	6.94264e-15	7.18219e-14
ZBTB6	182.691	197.596	188.238	9.3995	14.5538	32.7396	189.508	18.8976	3.31035	7.39974e-15	7.62486e-14
HOXA1	77.567	89.8898	124.371	5.87469	7.83664	3.06934	97.276	5.59355	4.13575	7.92799e-15	8.14221e-14
LOC101118128	82.6701	76.1229	89.0767	4.69975	1.11952	4.09245	82.6232	3.30391	4.64341	8.29115e-15	8.49766e-14
KIF1A	6058.39	6497.17	6179.06	272.586	134.342	784.727	6244.88	397.218	3.97396	8.81539e-15	9.0053e-14
LOC106991214	265.361	313.4	215.969	0	1.11952	0	264.91	0.373173	9.38759	9.53086e-15	9.69639e-14
-	73.4845	101.227	122.691	5.87469	2.23904	1.02311	99.1341	3.04561	5.06513	9.62787e-15	9.78709e-14
CFAP221	4.08247	7.28837	7.56311	89.2953	153.374	74.6872	6.31132	105.786	-4.04759	9.70652e-15	9.85898e-14
GLRA3	208.206	270.479	291.6	18.799	14.5538	45.0169	256.762	26.1232	3.28718	1.23927e-14	1.24152e-13
LOC101109765	80.6289	101.227	86.5556	10.5744	6.71712	9.20801	89.4706	8.83319	3.34361	1.44981e-14	1.44141e-13
PEG3	2926.11	3275.72	2916.84	97.5198	62.6931	364.228	3039.56	174.814	4.11829	1.6676e-14	1.64741e-13
TRNAG-CCC	77.567	105.276	94.1188	1.17494	6.71712	7.16178	92.3207	5.01795	4.17853	1.70712e-14	1.68379e-13
C15H11orf88	6.12371	12.1473	8.40346	191.515	360.485	82.8721	8.89148	211.624	-4.56066	1.8285e-14	1.79497e-13
PGM2L1	1840.18	2410.02	2375.66	65.7965	66.0517	287.494	2208.62	139.781	3.97967	1.94266e-14	1.90479e-13
KIAA0232	1773.83	1843.15	1993.3	166.841	120.908	392.875	1870.09	226.875	3.04161	2.11919e-14	2.07217e-13
LOC105602355	270.464	596.026	335.298	31.7233	57.0955	19.4391	400.596	36.086	3.47642	2.25414e-14	2.19893e-13
-	118.392	94.7488	80.6732	2.34988	0	6.13867	97.9379	2.82952	5.07076	2.29049e-14	2.23264e-13
IGF2R	740.969	758.8	694.126	32.8983	14.5538	92.0801	731.298	46.5107	3.96927	2.3263e-14	2.26489e-13
PROSER2	149.01	164.393	131.934	4.69975	6.71712	20.4622	148.446	10.6264	3.78047	2.49337e-14	2.41809e-13
ZBTB16	677.691	585.499	446.224	7.04963	8.95616	51.1556	569.804	22.3871	4.65783	2.55704e-14	2.47695e-13
CACNA1E	1309.45	1616.4	1463.88	81.0707	50.3784	229.177	1463.24	120.209	3.60307	3.1767e-14	3.04638e-13
IQSEC1	443.969	349.842	388.24	27.0236	26.8685	76.7334	394.017	43.5418	3.16992	3.27611e-14	3.13205e-13
LOC105616544	71.4433	93.1291	78.1522	3.52481	5.5976	7.16178	80.9082	5.42807	3.8839	3.59396e-14	3.41626e-13
TTC28	336.804	409.768	366.391	27.0236	11.1952	56.2712	370.988	31.4966	3.55095	3.72555e-14	3.53863e-13
LOC105615254	519.495	360.369	342.021	17.6241	3.35856	37.8551	407.295	19.6126	4.36716	3.94275e-14	3.73496e-13
C13H20orf194	1837.11	2194.61	2189.1	206.789	119.789	423.568	2073.61	250.049	3.05067	4.20818e-14	3.97883e-13
ADCY4	223.515	174.111	155.464	17.6241	14.5538	35.8089	184.363	22.6622	3.01247	4.68929e-14	4.41194e-13
NME9	5.10309	26.724	36.9752	572.195	373.92	280.333	22.9341	408.816	-4.14298	4.71675e-14	4.43442e-13
LOC106991634	1077.77	1071.39	775.639	30.5484	33.5856	134.028	974.934	66.0539	3.87884	5.15353e-14	4.81776e-13
LOC105603471	79.6082	104.467	101.682	14.0993	8.95616	10.2311	95.2522	11.0955	3.10958	5.54016e-14	5.15983e-13
LOC106991846	146.969	182.209	150.422	5.87469	1.11952	16.3698	159.867	7.788	4.33582	6.06258e-14	5.61279e-13
ANKRD34C	83.6907	158.724	163.027	7.04963	4.47808	14.3236	135.147	8.61709	3.95715	6.13709e-14	5.67544e-13
LOC105604883	294.959	304.492	386.559	15.2742	4.47808	37.8551	328.67	19.2025	4.0866	8.72165e-14	7.95914e-13
CRYBB3	14.2887	9.71782	12.6052	110.444	153.374	78.7796	12.2039	114.199	-3.23357	9.91216e-14	8.98955e-13
LOC105602261	99	150.626	105.043	5.87469	16.7928	11.2542	118.223	11.3072	3.38218	1.14708e-13	1.03204e-12
ACOT11	410.289	313.4	238.658	39.9479	11.1952	41.9476	320.782	31.0302	3.36751	1.17139e-13	1.05353e-12
LOC105603073	115.33	82.6015	80.6732	0	1.11952	4.09245	92.8682	1.73732	5.67038	1.18202e-13	1.06194e-12
-	711.371	624.37	688.243	56.397	33.5856	129.935	674.662	73.3059	3.19804	1.28467e-13	1.14836e-12
ZNF436	334.763	361.989	392.442	36.4231	20.1514	72.641	363.064	43.0718	3.06942	1.453e-13	1.28819e-12
PLEKHM3	353.134	330.406	297.483	25.8486	6.71712	43.9938	327.007	25.5199	3.67289	1.4632e-13	1.29677e-12
FANK1	18.3711	31.5829	33.6138	218.538	362.724	151.421	27.856	244.228	-3.12392	1.55308e-13	1.37106e-12
DLX1	0	1.61964	0.840346	75.196	99.6373	147.328	0.819994	107.387	-6.94168	1.62623e-13	1.43208e-12
-	367.423	485.081	374.794	16.4491	14.5538	61.3867	409.099	30.7965	3.72236	1.74553e-13	1.53172e-12
LOC105616702	111.247	123.902	139.497	11.7494	7.83664	22.5085	124.882	14.0315	3.14068	1.76683e-13	1.54878e-12
LOC101121080	663.402	664.861	563.872	41.1228	15.6733	92.0801	630.712	49.6254	3.66308	1.9628e-13	1.71332e-12
CALN1	135.742	146.577	124.371	8.22457	0	12.2773	135.564	6.83397	4.2955	2.06017e-13	1.79454e-12
LOC105605855	62.2577	106.086	167.229	2.34988	1.11952	5.11556	111.858	2.86165	5.26445	2.17341e-13	1.8879e-12
LOC105614182	71.4433	80.172	73.1101	7.04963	6.71712	3.06934	74.9085	5.61203	3.75746	2.23007e-13	1.93509e-12
LOC101123133	47.9691	34.0124	75.6311	460.576	667.234	256.801	52.5375	461.537	-3.13437	2.41683e-13	2.09242e-12
TULP4	784.856	772.567	730.261	68.1464	41.4222	155.513	762.561	88.3606	3.10589	2.43873e-13	2.10953e-12
FAM196A	169.423	161.964	169.75	11.7494	13.4342	33.7627	167.045	19.6488	3.07299	2.54571e-13	2.19596e-12
CACNA1I	377.629	319.068	316.81	12.9243	5.5976	41.9476	337.836	20.1565	4.05494	2.76142e-13	2.36972e-12
RET	1623.8	4015.89	5873.18	424.153	400.788	583.174	3837.62	469.372	3.03128	2.95132e-13	2.52138e-12
FAM135B	248.01	457.547	315.13	35.2481	20.1514	61.3867	340.229	38.9287	3.12309	2.96785e-13	2.5329e-12
FEZF2	0	0.809818	0.840346	155.092	135.462	110.496	0.550055	133.683	-7.83308	3.02298e-13	2.57818e-12
CRYM	97.9794	72.0738	48.7401	13433.1	1983.79	2738.87	72.9311	6051.91	-6.37543	3.27817e-13	2.78058e-12
MIR374B	72.4639	105.276	111.766	11.7494	12.3147	8.1849	96.5021	10.7497	3.17589	3.48211e-13	2.94353e-12
-	86.7526	76.1229	79.8329	0	1.11952	4.09245	80.9028	1.73732	5.47134	3.66738e-13	3.09175e-12
ACTA1	78.5876	20.2455	27.7314	378.33	437.732	491.094	42.1882	435.719	-3.38049	3.68873e-13	3.10659e-12
LOC105604781	89.8144	73.6935	73.9505	4.69975	0	5.11556	79.1528	3.27177	4.58422	3.8138e-13	3.20758e-12
ALK	171.464	161.964	126.892	14.0993	4.47808	22.5085	153.44	13.6953	3.4748	3.82573e-13	3.21328e-12
LOC105610416	206.165	149.816	182.355	22.3238	7.83664	29.6702	179.445	19.9436	3.16263	3.91757e-13	3.28598e-12
LMX1B	76.5464	113.375	114.287	1.17494	0	7.16178	101.403	2.77891	5.13444	4.03599e-13	3.37508e-12
LOC105603209	97.9794	106.896	69.7487	2.34988	0	2.04622	91.5414	1.46537	5.96131	4.11861e-13	3.4407e-12
LOC105606135	183.711	170.872	127.733	0	0	2.04622	160.772	0.682075	7.77751	4.17195e-13	3.47942e-12
LOC106991785	140.845	79.3622	71.4294	3.52481	1.11952	6.13867	97.2123	3.59434	4.7339	4.19366e-13	3.49636e-12
-	100.021	117.424	89.917	2.34988	0	1.02311	102.454	1.12433	6.53674	4.42193e-13	3.67798e-12
-	334.763	338.504	302.525	16.4491	15.6733	57.2943	325.264	29.8056	3.43773	4.49904e-13	3.73969e-12
LOC101122718	778.732	530.431	496.645	65.7965	21.2709	93.1032	601.936	60.0569	3.32249	4.59459e-13	3.81274e-12
C15H11orf97	13.268	8.908	10.9245	197.39	156.733	68.5485	11.0335	140.89	-3.68114	4.89129e-13	4.04144e-12
LMTK2	1058.38	755.561	857.153	72.8462	39.1832	164.721	890.365	92.2501	3.26765	5.14327e-13	4.23839e-12
-	159.216	129.571	158.825	3.52481	3.35856	18.416	149.204	8.43313	4.11708	5.95638e-13	4.87296e-12
LOC101112460	206.165	149.816	128.573	0	0	2.04622	161.518	0.682075	7.7842	6.01868e-13	4.92231e-12
SCTR	7.14433	6.47855	5.88242	57.572	78.3664	68.5485	6.50177	68.1623	-3.39641	6.13642e-13	5.00873e-12
KIRREL	227.598	132.81	121.85	2.34988	0	11.2542	160.753	4.5347	5.10994	6.45307e-13	5.25341e-12
-	2.04124	2.42946	3.36138	50.5223	63.8126	64.4561	2.61069	59.597	-4.49971	6.46033e-13	5.2576e-12
LOC101118452	21.433	9.71782	14.2859	187.99	220.545	89.0107	15.1456	165.849	-3.46581	6.65562e-13	5.41122e-12
C1H1orf189	112.268	57.4971	100.001	823.631	1838.25	445.054	89.9221	1035.65	-3.52726	7.22341e-13	5.83663e-12
DUSP4	218.412	198.406	136.136	8.22457	15.6733	30.6934	184.318	18.1971	3.32594	7.6554e-13	6.17767e-12
DYNC1LI2	3804.87	4287.99	3792.48	298.434	248.533	859.414	3961.78	468.794	3.07836	7.69652e-13	6.20884e-12
LOC105606989	87.7732	94.7488	108.405	3.52481	7.83664	14.3236	96.9755	8.56167	3.47889	8.70178e-13	6.97459e-12
KLK7	81.6495	135.24	66.3873	7.04963	2.23904	2.04622	94.4255	3.7783	4.67104	8.94289e-13	7.16093e-12
-	70.4227	71.264	70.5891	5.87469	1.11952	5.11556	70.7586	4.03659	4.13076	8.99094e-13	7.19247e-12
KIAA0430	3265.98	3111.32	2637.85	169.191	152.255	574.989	3005.05	298.812	3.32891	9.3508e-13	7.45877e-12
FAM91A1	773.629	815.487	748.748	41.1228	31.3466	137.097	779.288	69.8555	3.47527	9.77745e-13	7.75931e-12
DNAAF1	8.16495	7.28837	11.7648	137.468	263.087	69.5716	9.07272	156.709	-4.10759	1.01447e-12	8.03286e-12
-	248.01	238.896	80.6732	2.34988	14.5538	5.11556	189.193	7.33973	4.68635	1.06257e-12	8.40032e-12
LOC105606235	81.6495	93.9389	89.917	0	0	0	88.5018	0	8.76837	1.09196e-12	8.61897e-12
PITX3	80.6289	302.872	490.762	16.4491	13.4342	13.3005	291.421	14.3946	4.3421	1.12404e-12	8.85819e-12
-	152.072	127.141	110.085	4.69975	4.47808	18.416	129.766	9.19795	3.79325	1.33284e-12	1.04409e-11
IQCA1	7.14433	15.3866	20.1683	265.536	293.314	89.0107	14.2331	215.954	-3.91044	1.37884e-12	1.07673e-11
CEP135	85.7319	63.1658	72.2698	4.69975	5.5976	8.1849	73.7225	6.16075	3.56555	1.42822e-12	1.11372e-11
PVRL1	311.289	336.075	337.819	27.0236	19.0318	68.5485	328.394	38.2013	3.09611	1.44103e-12	1.12248e-11
-	94.9175	91.5095	80.6732	0	0	6.13867	89.0334	2.04622	5.36041	1.54245e-12	1.19774e-11
ZNF862	476.629	434.063	413.45	31.7233	30.227	95.1494	441.381	52.3666	3.06884	1.64688e-12	1.27245e-11
EIF5A2	421.515	570.922	552.107	22.3238	2.23904	45.0169	514.848	23.1933	4.46632	1.83599e-12	1.41202e-11
HSPA12A	1307.41	1008.22	1067.24	49.3474	35.8246	180.068	1127.63	88.4132	3.66945	1.84491e-12	1.41843e-11
ASIC3	4.08247	3.23927	5.04208	59.9218	81.7249	51.1556	4.12127	64.2675	-3.96398	1.89115e-12	1.45265e-11
NPTX2	160.237	41.3007	48.7401	1392.3	572.075	1806.82	83.426	1257.06	-3.91806	1.99077e-12	1.5254e-11
PITPNM3	377.629	408.148	468.913	21.1489	16.7928	72.641	418.23	36.8609	3.49632	2.08231e-12	1.59211e-11
ST3GAL1	299.041	187.068	193.28	8.22457	13.4342	35.8089	226.463	19.1559	3.54891	2.19539e-12	1.67343e-11
LOC106991452	78.5876	85.0309	103.363	4.69975	3.35856	12.2773	88.9937	6.77855	3.691	2.30259e-12	1.74925e-11
EFCAB12	3.06186	4.85891	7.56311	121.019	161.211	49.1094	5.16129	110.446	-4.40103	2.33867e-12	1.77504e-11
ITPRIPL2	107.165	81.7917	73.9505	0	0	4.09245	87.6357	1.36415	5.91195	2.57554e-12	1.94769e-11
MAML1	250.052	272.909	308.407	16.4491	21.2709	57.2943	277.122	31.6714	3.11955	2.6351e-12	1.98971e-11
FSHB	2.04124	10.5276	1.68069	263.186	129.864	80.8258	4.74986	157.959	-5.02513	2.75206e-12	2.07488e-11
STK4	335.783	291.535	247.902	22.3238	11.1952	52.1787	291.74	28.5659	3.34358	3.04102e-12	2.28444e-11
IL1RAPL1	70.4227	97.1782	69.7487	2.34988	0	2.04622	79.1165	1.46537	5.75255	3.23157e-12	2.42319e-11
-	94.9175	89.08	133.615	8.22457	6.71712	17.3929	105.871	10.7782	3.28107	3.78818e-12	2.82779e-11
IQSEC3	1859.57	1213.92	1589.09	104.569	77.2469	305.91	1554.19	162.576	3.25498	3.90037e-12	2.90892e-11
LOC105606369	87.7732	67.2149	64.7066	2.34988	0	5.11556	73.2316	2.48848	4.84125	4.84754e-12	3.58632e-11
RANBP10	353.134	374.136	346.223	15.2742	12.3147	59.3405	357.831	28.9765	3.61658	4.95896e-12	3.66766e-11
LOC105603543	86.7526	86.6506	100.001	4.69975	1.11952	11.2542	91.1348	5.69117	3.9748	5.18071e-12	3.82144e-11
CHRNB3	161.258	899.708	1374.81	0	0	0	811.924	0	11.9651	5.22346e-12	3.8507e-11
-	38.7835	17.0062	7.56311	256.136	197.035	229.177	21.1176	227.45	-3.44692	5.25425e-12	3.87225e-11
LOC101116523	87.7732	56.6873	105.884	7.04963	4.47808	8.1849	83.448	6.57087	3.6605	5.91813e-12	4.33202e-11
LOC101122504	0	0.809818	1.68069	102.22	53.7369	90.0339	0.83017	81.9968	-6.54936	6.04409e-12	4.42292e-11
DNAJB13	16.3299	25.1044	34.4542	202.089	407.505	141.189	25.2962	250.261	-3.29953	6.28846e-12	4.58691e-11
FREM2	143.907	237.277	151.262	5.87469	0	15.3467	177.482	7.07379	4.62894	6.9967e-12	5.07822e-11
PAX5	61.2371	128.761	132.775	11.7494	10.0757	9.20801	107.591	10.3444	3.38531	7.83399e-12	5.63988e-11
KISS1	1.02062	0	3.36138	182.115	36.9442	166.767	1.46067	128.609	-6.4541	7.90938e-12	5.69087e-11
LOC106991255	57.1546	109.325	74.7908	2.34988	1.11952	6.13867	80.4236	3.20269	4.62121	8.12589e-12	5.84159e-11
ZBBX	6.12371	4.85891	12.6052	63.4466	118.669	94.1263	7.8626	92.0807	-3.54411	8.2325e-12	5.91481e-11
RASSF2	304.144	295.584	258.827	42.2978	8.95616	41.9476	286.185	31.0672	3.20208	8.3799e-12	6.00684e-11
METTL4	58.1753	90.6997	82.3539	9.3995	7.83664	6.13867	77.0763	7.7916	3.31772	8.48031e-12	6.07532e-11
INSM2	7.14433	4.04909	2.52104	74.0211	129.864	52.1787	4.57149	85.3547	-4.25104	8.70528e-12	6.23111e-11
EXOC6B	863.443	935.34	879.842	39.9479	27.988	150.397	892.875	72.7778	3.61289	1.00027e-11	7.11275e-11
PPEF2	56.134	69.6444	59.6646	3.52481	1.11952	3.06934	61.8143	2.57122	4.58862	1.01991e-11	7.2441e-11
LOC106991509	87.7732	67.2149	69.7487	1.17494	1.11952	7.16178	74.9123	3.15208	4.521	1.04741e-11	7.43518e-11
EML4	315.371	309.351	305.046	35.2481	10.0757	54.2249	309.922	33.1829	3.21859	1.06871e-11	7.57774e-11
HS2ST1	332.722	432.443	421.854	23.4988	13.4342	69.5716	395.673	35.5015	3.47117	1.19119e-11	8.41983e-11
ND2	16736.1	9934.04	3909.29	1115.02	948.233	1578.66	10193.1	1213.97	3.06967	1.23251e-11	8.69459e-11
-	82.6701	163.583	90.7574	11.7494	6.71712	14.3236	112.337	10.93	3.35823	1.31323e-11	9.23267e-11
SLC25A37	90.835	96.3684	100.001	8.22457	2.23904	14.3236	95.7349	8.26239	3.51843	1.3522e-11	9.48791e-11
LOC105602059	106.144	155.485	114.287	5.87469	4.47808	19.4391	125.306	9.93063	3.63707	1.50927e-11	1.05218e-10
LOC105606075	119.412	89.08	89.917	4.69975	1.11952	12.2773	99.4698	6.03221	4.0163	1.6046e-11	1.11551e-10
LOC105603593	88.7938	64.7855	51.2611	3.52481	4.47808	5.11556	68.2801	4.37282	3.95373	1.66154e-11	1.15124e-10
EGR4	12.2474	8.09818	6.72277	99.8697	61.5736	170.86	9.02279	110.768	-3.63324	1.66466e-11	1.15308e-10
WIPF2	659.32	498.038	660.512	42.2978	27.988	121.75	605.957	64.012	3.23817	1.91439e-11	1.31727e-10
LOC105604834	53.0722	71.264	90.7574	0	0	0	71.6979	0	8.46569	2.14618e-11	1.46985e-10
-	31.6392	18.6258	21.0087	271.411	101.876	195.414	23.7579	189.567	-3.00411	2.14995e-11	1.47203e-10
LOC105602425	345.99	310.16	267.23	19.9739	22.3904	67.5254	307.793	36.6299	3.06213	2.16119e-11	1.47932e-10
FOXA2	30.6186	132.81	215.129	0	0	0	126.186	0	9.2806	2.39037e-11	1.63171e-10
-	56.134	63.9757	70.5891	3.52481	0	4.09245	63.5662	2.53909	4.63306	2.41038e-11	1.64491e-10
-	290.876	241.326	173.952	4.69975	2.23904	25.5778	235.385	10.8389	4.42088	2.59709e-11	1.76411e-10
LOC106991439	102.062	263.191	183.195	16.4491	3.35856	18.416	182.816	12.7412	3.84028	2.62061e-11	1.77911e-10
ABL1	438.866	434.063	397.484	39.9479	21.2709	92.0801	423.471	51.0996	3.04558	2.71501e-11	1.84019e-10
POU3F4	73.4845	101.227	106.724	8.22457	3.35856	14.3236	93.8119	8.63556	3.42806	2.81553e-11	1.90417e-10
-	88.7938	97.988	119.329	3.52481	5.5976	16.3698	102.037	8.4974	3.5612	3.24464e-11	2.18489e-10
-	0	0	0	84.5955	139.94	30.6934	0	85.0763	-9.02762	3.25816e-11	2.19221e-10
LOC106991474	73.4845	77.7426	69.7487	1.17494	0	2.04622	73.6586	1.07372	6.06592	3.27411e-11	2.20235e-10
LOC105602262	82.6701	97.988	59.6646	0	2.23904	1.02311	80.1076	1.08738	6.18543	3.63177e-11	2.42654e-10
LOC105615321	4.08247	20.2455	12.6052	171.541	111.952	109.473	12.311	130.989	-3.38692	4.03881e-11	2.68768e-10
LOC101116085	444.99	162.774	303.365	42.2978	10.0757	28.6471	303.709	27.0069	3.49246	5.02122e-11	3.30959e-10
-	612.371	678.628	547.906	35.2481	20.1514	112.542	612.968	55.9806	3.44796	5.30359e-11	3.48647e-10
PIWIL3	88.7938	100.417	61.3453	9.3995	2.23904	9.20801	83.5189	6.94885	3.58379	5.75796e-11	3.76726e-10
SLC22A8	16.3299	12.9571	19.328	156.267	86.203	358.089	16.205	200.186	-3.62884	5.8777e-11	3.84359e-10
-	64.299	66.4051	84.875	0	4.47808	0	71.8597	1.49269	5.60795	6.04225e-11	3.94601e-10
LOC106991679	60.2165	59.9266	52.1015	1.17494	2.23904	2.04622	57.4148	1.82007	4.96744	6.09984e-11	3.97944e-10
MYBPC1	103.082	213.792	342.861	3.52481	4.47808	21.4854	219.912	9.82942	4.46581	6.35228e-11	4.13762e-10
LARP1	2334.15	2202.71	2327.76	170.366	89.5616	470.632	2288.21	243.52	3.23092	6.38479e-11	4.15663e-10
LOC101106386	0	0.809818	1.68069	92.8201	145.538	38.8783	0.83017	92.412	-6.72682	6.44524e-11	4.19269e-10
ANKRD61	100.021	87.4604	52.9418	5.87469	4.47808	0	80.1409	3.45092	4.57506	6.52867e-11	4.24363e-10
-	51.0309	73.6935	60.5049	1.17494	5.5976	2.04622	61.7431	2.93959	4.3943	6.91118e-11	4.48057e-10
LOC101117099	74.5051	105.276	84.0346	3.52481	3.35856	13.3005	87.9387	6.72794	3.68175	8.70919e-11	5.59379e-10
-	241.887	102.037	142.018	8.22457	23.5099	19.4391	161.981	17.0579	3.23975	9.03962e-11	5.79629e-10
-	94.9175	78.5524	76.4715	1.17494	0	8.1849	83.3138	3.11994	4.68558	9.05886e-11	5.8064e-10
LOC105604955	41.8454	85.8408	90.7574	5.87469	3.35856	4.09245	72.8145	4.4419	4.04504	1.01549e-10	6.48222e-10
-	0	0	0	55.2221	40.3027	53.2018	0	49.5755	-8.24956	1.04539e-10	6.65939e-10
CHML	403.144	440.541	379.836	10.5744	3.35856	48.0863	407.841	20.6731	4.29178	1.09492e-10	6.96243e-10
GPR6	2.04124	0	0.840346	54.0471	52.6174	75.7103	0.960528	60.7916	-6.09465	1.16765e-10	7.39474e-10
RPRML	38.7835	12.1473	13.4455	136.293	326.9	207.692	21.4588	223.628	-3.3979	1.24309e-10	7.86045e-10
ADAMTS20	90.835	217.841	164.708	12.9243	27.988	17.3929	157.795	19.4351	3.02227	1.29561e-10	8.17182e-10
KCNG4	105.124	117.424	53.7822	7.04963	0	1.02311	92.1098	2.69091	5.13808	1.32985e-10	8.37718e-10
LOC106991744	0	0	0	101.045	24.6294	82.8721	0	69.5154	-8.73708	1.55622e-10	9.74396e-10
CLDN9	1.02062	0	1.68069	407.703	42.5418	62.4098	0.900437	170.885	-7.58766	1.61477e-10	1.00928e-09
LOC106991537	61.2371	72.0738	84.875	3.52481	7.83664	11.2542	72.7286	7.53856	3.25253	1.61937e-10	1.01165e-09
TH	839.969	3030.34	4021.9	264.361	404.147	244.524	2630.74	304.344	3.11193	1.75532e-10	1.09134e-09
C12H1orf158	0	4.85891	12.6052	200.914	363.844	76.7334	5.82137	213.831	-5.17364	1.98788e-10	1.22769e-09
CCDC129	120.433	167.632	103.363	14.0993	0	7.16178	130.476	7.08701	4.21194	2.01451e-10	1.2426e-09
NHLH1	120.433	57.4971	58.8242	3.52481	7.83664	4.09245	78.9181	5.1513	3.93468	2.05153e-10	1.26361e-09
ICAM5	38.7835	26.724	23.5297	276.11	114.191	499.279	29.6791	296.527	-3.32571	2.13616e-10	1.31405e-09
LOC101102813	74.5051	101.227	115.127	4.69975	2.23904	14.3236	96.9533	7.08745	3.75074	2.18721e-10	1.34413e-09
VGLL2	0	0	0	55.2221	32.4661	61.3867	0	49.6916	-8.25358	2.27661e-10	1.39768e-09
-	91.8557	155.485	64.7066	0	6.71712	0	104.016	2.23904	5.55123	2.34666e-10	1.43963e-09
-	297	1807.51	1155.48	11.7494	25.749	3.06934	1086.66	13.5226	6.33165	2.60193e-10	1.58802e-09
ALDH1A1	5066.35	24644.4	25638.1	729.636	167.928	443.008	18449.6	446.857	5.36771	2.62471e-10	1.60152e-09
AGRP	7.14433	1.61964	1.68069	1218.41	72.7688	1165.32	3.48155	818.835	-7.90054	2.65173e-10	1.61643e-09
LOC101111090	103.082	149.816	99.1608	9.3995	3.35856	19.4391	117.353	10.7324	3.43685	2.65293e-10	1.61676e-09
LOC106991267	77.567	66.4051	52.9418	2.34988	6.71712	8.1849	65.638	5.75063	3.49138	2.65651e-10	1.61855e-09
LOC105616444	282.711	584.689	461.35	31.7233	27.988	94.1263	442.917	51.2792	3.10592	2.90768e-10	1.76424e-09
LOC101122341	103.082	225.939	317.651	18.799	5.5976	26.6009	215.558	16.9992	3.66046	3.25741e-10	1.96542e-09
-	174.526	216.222	212.608	4.69975	8.95616	33.7627	201.118	15.8062	3.65362	3.50883e-10	2.10792e-09
-	69.4021	55.0677	78.9925	1.17494	8.95616	4.09245	67.8207	4.74118	3.83102	3.57088e-10	2.14262e-09
FOXF1	138.804	157.105	108.405	17.6241	5.5976	25.5778	134.771	16.2665	3.04295	3.78632e-10	2.2637e-09
LOC101107188	51.0309	61.5462	64.7066	3.52481	5.5976	8.1849	59.0946	5.7691	3.34087	3.87954e-10	2.3172e-09
LOC105609490	100.021	160.344	111.766	1.17494	16.7928	5.11556	124.044	7.69443	4.0095	3.88259e-10	2.31847e-09
LOC106990929	189.835	141.718	157.145	4.69975	3.35856	24.5547	162.899	10.871	3.88445	4.0352e-10	2.40614e-09
LOC105604562	61.2371	46.9695	57.9839	4.69975	2.23904	6.13867	55.3968	4.35915	3.65512	4.80962e-10	2.84813e-09
PRKAG3	215.35	89.8898	88.2363	17.6241	11.1952	14.3236	131.159	14.3809	3.18798	5.08618e-10	3.00405e-09
-	83.6907	68.0247	89.917	2.34988	0	0	80.5442	0.783292	6.76942	5.54417e-10	3.25754e-09
LOC105605661	68.3814	52.6382	51.2611	2.34988	4.47808	7.16178	57.4269	4.66325	3.59721	6.09917e-10	3.56932e-09
SUSD6	434.783	385.474	443.703	30.5484	7.83664	70.5947	421.32	36.3266	3.53046	6.18021e-10	3.6142e-09
-	136.763	94.7488	51.2611	9.3995	10.0757	9.20801	94.2576	9.56106	3.29919	6.51422e-10	3.80238e-09
TMEM212	6.12371	7.28837	9.24381	59.9218	207.111	67.5254	7.55196	111.519	-3.87809	6.691e-10	3.89734e-09
CDH16	10.2062	8.09818	13.4455	97.5198	352.649	71.6178	10.5833	173.929	-4.03845	6.91895e-10	4.02635e-09
LOC105602853	189.835	201.645	70.5891	22.3238	7.83664	13.3005	154.023	14.487	3.41463	6.94183e-10	4.03872e-09
-	6.12371	0	2.52104	74.0211	123.147	46.04	2.88158	81.0694	-4.88012	7.02122e-10	4.08249e-09
PLK5	16.3299	3.23927	10.0842	78.7208	139.94	93.1032	9.88444	103.921	-3.42007	7.02363e-10	4.08249e-09
LOC101109919	15.3093	8.09818	9.24381	96.3449	114.191	54.2249	10.8838	88.2536	-3.03472	7.45303e-10	4.31934e-09
LOC105603604	113.289	91.5095	70.5891	16.4491	5.5976	4.09245	91.7957	8.71306	3.41585	7.58657e-10	4.38823e-09
LOC106991627	95.9381	52.6382	49.5804	0	1.11952	4.09245	66.0523	1.73732	5.18503	7.63969e-10	4.41789e-09
B3GNT4	3.06186	0.809818	1.68069	52.8722	35.8246	47.0632	1.85079	45.2533	-4.66585	7.67959e-10	4.43787e-09
LOC106991172	55.1134	44.54	55.4628	4.69975	3.35856	1.02311	51.7054	3.02714	4.12451	8.02109e-10	4.62448e-09
DMRTA1	24.4948	227.559	239.499	0	1.11952	0	163.851	0.373173	8.69539	8.07453e-10	4.65421e-09
-	62.2577	80.172	95.7995	7.04963	0	8.1849	79.4097	5.07817	3.95873	8.41187e-10	4.83522e-09
TRPC6	78.5876	272.909	263.028	22.3238	16.7928	27.624	204.842	22.2469	3.20216	9.06428e-10	5.19823e-09
-	42.866	53.448	55.4628	3.52481	1.11952	4.09245	50.5923	2.91226	4.11091	9.24455e-10	5.29552e-09
-	38.7835	40.4909	39.4963	441.777	523.935	110.496	39.5902	358.736	-3.17887	9.43437e-10	5.39928e-09
LOC105611959	55.1134	72.8837	72.2698	4.69975	1.11952	9.20801	66.7556	5.00909	3.71556	9.52769e-10	5.44893e-09
CAPSL	6.12371	41.3007	47.8997	439.427	609.019	227.131	31.7747	425.192	-3.73377	9.61795e-10	5.49676e-09
AFMID	207.186	716.689	231.936	31.7233	38.0637	57.2943	385.27	42.3604	3.1832	9.70855e-10	5.54726e-09
C1H1orf111	48.9897	72.0738	49.5804	0	1.11952	3.06934	56.8813	1.39629	5.28842	9.76322e-10	5.57722e-09
-	56.134	83.4113	48.7401	2.34988	5.5976	7.16178	62.7618	5.03642	3.62229	1.02629e-09	5.85323e-09
DOCK5	480.711	610.603	427.736	85.7705	11.1952	54.2249	506.35	50.3969	3.33012	1.09685e-09	6.23283e-09
LOC105602007	47.9691	67.2149	47.8997	2.34988	3.35856	6.13867	54.3612	3.94904	3.76207	1.10121e-09	6.25475e-09
GRM5	892.021	585.499	502.527	27.0236	13.4342	106.404	660.015	48.9538	3.74804	1.11686e-09	6.33785e-09
-	201.062	153.056	182.355	17.6241	4.47808	32.7396	178.824	18.2806	3.28103	1.1561e-09	6.55307e-09
LOC105615980	127.577	111.755	136.976	5.87469	0	15.3467	125.436	7.07379	4.12777	1.1667e-09	6.60865e-09
LOC101111936	10.2062	52.6382	9.24381	262.011	536.25	262.94	24.0294	353.734	-3.87081	1.2674e-09	7.15463e-09
TAB3	551.134	562.014	539.502	50.5223	20.1514	120.727	550.883	63.8003	3.10639	1.41547e-09	7.94365e-09
CCDC33	3.06186	5.66873	25.2104	180.94	558.64	118.681	11.3137	286.087	-4.64981	1.43551e-09	8.04888e-09
LOC105616744	62.2577	119.853	64.7066	0	0	1.02311	82.2725	0.341037	7.70233	1.50044e-09	8.38276e-09
CHRM1	135.742	38.8713	57.1435	701.438	332.497	1032.32	77.2524	688.752	-3.16118	1.51207e-09	8.44391e-09
PAX3	176.567	29.9633	42.0173	0	0	0	82.8492	0	8.66964	1.55362e-09	8.66041e-09
-	113.289	101.227	83.1943	9.3995	0	11.2542	99.2367	6.88458	3.84071	1.55677e-09	8.67407e-09
GUCA1A	48.9897	59.9266	41.177	4.69975	3.35856	3.06934	50.0311	3.70922	3.76405	1.64564e-09	9.14266e-09
MYL10	0	2.42946	1.68069	49.3474	97.3982	32.7396	1.37005	59.8284	-5.3751	1.82332e-09	1.00758e-08
-	368.443	318.259	332.777	21.1489	7.83664	63.4329	339.826	30.8062	3.45614	2.14218e-09	1.17544e-08
LOC101117035	248.01	259.142	261.348	5.87469	31.3466	46.04	256.167	27.7538	3.19815	2.17828e-09	1.19393e-08
-	54.0928	42.9204	59.6646	1.17494	0	3.06934	52.2259	1.41476	5.15988	2.1835e-09	1.19653e-08
MFSD11	447.031	450.259	439.501	19.9739	6.71712	72.641	445.597	33.1107	3.74373	2.37934e-09	1.29756e-08
LOC101105022	4.08247	0	6.72277	140.993	42.5418	105.381	3.60175	96.3049	-4.75363	2.48357e-09	1.35233e-08
ZBED6CL	89.8144	87.4604	95.7995	3.52481	6.71712	18.416	91.0248	9.55265	3.22893	2.60947e-09	1.41593e-08
LOC105610139	20.4124	14.5767	21.0087	177.416	372.8	70.5947	18.6659	206.937	-3.4724	2.82543e-09	1.52612e-08
CNTN2	4181.47	3699.25	3366.43	92.8201	34.7051	287.494	3749.05	138.34	4.75931	2.82701e-09	1.52665e-08
PRKAA2	102.062	108.516	78.1522	5.87469	0	12.2773	96.2432	6.05068	3.9716	2.86228e-09	1.54502e-08
LOC105608011	110.227	85.0309	83.1943	11.7494	16.7928	3.06934	92.8173	10.5372	3.15176	2.86864e-09	1.54812e-08
DLX2	0	0	0	31.7233	30.227	50.1325	0	37.3609	-7.84337	2.89165e-09	1.55918e-08
-	53.0722	55.0677	62.1856	1.17494	0	6.13867	56.7751	2.43787	4.48831	3.23902e-09	1.73671e-08
LOC105607702	74.5051	55.0677	74.7908	2.34988	0	0	68.1212	0.783292	6.52608	3.45634e-09	1.84687e-08
LOC105607198	130.639	124.712	152.943	16.4491	4.47808	27.624	136.098	16.1837	3.06314	3.53472e-09	1.88536e-08
LOC105603269	42.866	13.7669	25.2104	356.006	122.028	207.692	27.2811	228.575	-3.07616	3.63273e-09	1.93324e-08
LOC106991806	53.0722	71.264	72.2698	0	3.35856	8.1849	65.5353	3.84782	4.04952	3.67333e-09	1.95359e-08
LOC101109343	41.8454	57.4971	73.9505	1.17494	1.11952	6.13867	57.7643	2.81104	4.3201	3.73373e-09	1.98232e-08
-	5.10309	8.09818	8.40346	77.5459	91.8006	38.8783	7.20158	69.4083	-3.25353	3.75618e-09	1.99382e-08
LOC101123316	47.9691	92.3193	62.1856	7.04963	3.35856	9.20801	67.4913	6.53873	3.36194	3.85253e-09	2.04061e-08
-	51.0309	55.0677	46.219	2.34988	3.35856	7.16178	50.7725	4.29007	3.53883	3.92698e-09	2.07651e-08
LOC101107342	110.227	68.8346	54.6225	10.5744	5.5976	11.2542	77.8946	9.14209	3.08455	4.05599e-09	2.142e-08
C3H2orf50	0	4.04909	6.72277	95.17	259.729	39.9014	3.59062	131.6	-5.16102	4.09973e-09	2.16326e-08
LOC105611150	77.567	71.264	49.5804	1.17494	0	0	66.1371	0.391646	7.38409	4.58922e-09	2.41234e-08
FOXO3	282.711	285.866	257.146	12.9243	1.11952	35.8089	275.241	16.6176	4.04034	4.67853e-09	2.45722e-08
-	578.691	532.051	559.671	29.3734	11.1952	102.311	556.804	47.6266	3.54245	4.69152e-09	2.46352e-08
KIF21B	984.897	917.524	860.514	71.6712	26.8685	195.414	920.978	97.9847	3.23009	4.88198e-09	2.55759e-08
TP73	1.02062	4.85891	10.9245	119.844	226.143	45.0169	5.60134	130.335	-4.51655	4.94311e-09	2.58635e-08
ITGAX	133.701	72.8837	93.2784	4.69975	5.5976	18.416	99.9544	9.57112	3.36265	5.02145e-09	2.62348e-08
LOC105606000	114.309	42.1106	84.875	0	2.23904	7.16178	80.4316	3.13361	4.63701	5.05398e-09	2.63882e-08
SCGN	10.2062	13.7669	14.2859	124.543	307.868	55.248	12.753	162.553	-3.66692	5.28842e-09	2.7543e-08
WDR63	4.08247	5.66873	16.8069	106.919	292.195	65.4792	8.85271	154.864	-4.11729	5.49435e-09	2.85557e-08
LOC105603451	88.7938	36.4418	84.0346	5.87469	5.5976	7.16178	69.7567	6.21136	3.48274	5.74023e-09	2.97096e-08
-	0	0	0	199.739	21.2709	24.5547	0	81.855	-8.97174	5.78614e-09	2.9941e-08
GATA3	144.928	76.9328	42.8577	2.34988	0	0	88.2394	0.783292	6.89142	5.86481e-09	3.03228e-08
FAM159A	6.12371	3.23927	1.68069	34.0732	66.0517	52.1787	3.68123	50.7679	-3.82408	6.28171e-09	3.23507e-08
LOC105604577	56.134	51.0186	50.4208	3.52481	0	0	52.5244	1.17494	5.56102	6.28587e-09	3.23654e-08
-	34.701	54.2578	51.2611	3.52481	2.23904	1.02311	46.74	2.26232	4.40008	6.30251e-09	3.24444e-08
LOC106991595	58.1753	46.1597	47.8997	5.87469	4.47808	7.16178	50.7449	5.83818	3.11114	6.37424e-09	3.2773e-08
LOC105606565	29.5979	34.8222	69.7487	0	0	0	44.723	0	7.7847	6.43021e-09	3.30403e-08
ASB4	104.103	519.094	630.26	27.0236	41.4222	50.1325	417.819	39.5261	3.40067	6.65188e-09	3.4144e-08
SC5	2.04124	4.85891	5.04208	38.773	66.0517	40.9245	3.98074	48.583	-3.58075	7.27728e-09	3.72697e-08
-	68.3814	51.8284	55.4628	1.17494	6.71712	0	58.5576	2.63069	4.49587	7.67103e-09	3.91975e-08
-	11.2268	3.23927	3.36138	74.0211	57.0955	52.1787	5.94249	61.0984	-3.40557	7.79173e-09	3.97471e-08
KCNH5	146.969	114.184	106.724	4.69975	7.83664	25.5778	122.626	12.7047	3.25155	8.12359e-09	4.1315e-08
LOC105609229	84.7113	67.2149	63.8663	10.5744	1.11952	9.20801	71.9309	6.96732	3.36569	8.76646e-09	4.4385e-08
LOC101112434	143.907	252.663	376.475	24.6737	50.3784	11.2542	257.682	28.7688	3.1674	8.98185e-09	4.54201e-08
LOC105603946	33.6804	61.5462	57.1435	2.34988	3.35856	5.11556	50.79	3.608	3.80167	9.00016e-09	4.54942e-08
LOC106991168	72.4639	80.172	82.3539	2.34988	1.11952	12.2773	78.33	5.24891	3.86589	9.0469e-09	4.57212e-08
-	715.454	571.732	458.829	48.1725	25.749	139.143	582.005	71.0215	3.03092	9.11775e-09	4.60512e-08
SLC7A5	846.093	855.168	679	43.4727	22.3904	164.721	793.42	76.8614	3.36442	9.13548e-09	4.61314e-08
POU4F2	22.4536	68.8346	44.5383	0	0	0	45.2755	0	7.80383	9.34853e-09	4.71403e-08
LOC101121082	173.505	181.399	163.867	7.04963	0	21.4854	172.924	9.51166	4.16859	9.47534e-09	4.77314e-08
-	42.866	72.8837	62.1856	0	0	5.11556	59.3117	1.70519	5.04506	9.84915e-09	4.94743e-08
RARRES1	38.7835	101.227	78.9925	356.006	1091.53	327.396	73.0011	591.645	-3.01558	1.01484e-08	5.09262e-08
IFFO2	60.2165	46.9695	73.1101	3.52481	0	7.16178	60.0987	3.5622	4.04981	1.02217e-08	5.12835e-08
-	35.7216	58.3069	26.8911	0	0	0	40.3065	0	7.6342	1.04227e-08	5.22501e-08
PIFO	4.08247	4.85891	16.8069	123.368	268.685	55.248	8.58277	149.1	-4.10779	1.07453e-08	5.37915e-08
CHRNA5	210.247	102.037	135.296	1.17494	21.2709	10.2311	149.193	10.8923	3.76964	1.14575e-08	5.71611e-08
LOC105602693	79.6082	76.9328	42.0173	0	2.23904	0	66.1861	0.746347	6.48896	1.20295e-08	5.98589e-08
-	0	0	0	56.397	24.6294	25.5778	0	35.5348	-7.76692	1.41979e-08	7.00333e-08
TBX2	50.0103	40.4909	39.4963	1.17494	3.35856	4.09245	43.3325	2.87532	3.8884	1.44377e-08	7.11595e-08
SOWAHC	187.794	170.872	191.599	11.7494	6.71712	40.9245	183.421	19.797	3.19987	1.55348e-08	7.62648e-08
EBF3	58.1753	191.927	235.297	11.7494	0	10.2311	161.8	7.32683	4.46505	1.65974e-08	8.13209e-08
-	45.9278	52.6382	52.9418	3.52481	0	6.13867	50.5026	3.22116	3.94716	1.67465e-08	8.19708e-08
AKAP14	4.08247	8.908	5.04208	64.6216	115.311	36.832	6.01085	72.2547	-3.57039	1.72513e-08	8.43424e-08
-	1.02062	0.809818	0	98.6948	33.5856	48.0863	0.610146	60.1222	-6.66846	1.79712e-08	8.76381e-08
SLC30A10	62.2577	123.092	60.5049	9.3995	3.35856	12.2773	81.9517	8.34514	3.29019	1.90294e-08	9.26352e-08
XYLT1	371.505	430.014	378.996	34.0732	12.3147	89.0107	393.505	45.1329	3.1193	1.93777e-08	9.41653e-08
WIF1	91.8557	70.4542	50.4208	1272.46	333.617	277.263	70.9102	627.779	-3.14737	1.9698e-08	9.56468e-08
LOC105615202	44.9072	55.0677	60.5049	0	0	1.02311	53.4933	0.341037	7.08105	2.03833e-08	9.87626e-08
-	55.1134	82.6015	35.2945	2.34988	1.11952	6.13867	57.6698	3.20269	4.14343	2.08214e-08	1.00748e-07
CCDC113	1.02062	1.61964	3.36138	76.371	114.191	17.3929	2.00055	69.3183	-5.09077	2.19215e-08	1.05824e-07
LOC101121256	65.3196	49.3989	47.8997	1.17494	0	1.02311	54.2061	0.732683	6.20313	2.6031e-08	1.24864e-07
EPHA8	100.021	74.5033	68.9084	10.5744	1.11952	12.2773	81.1441	7.99044	3.33617	2.63586e-08	1.26313e-07
PRDM13	0	0	0	21.1489	27.988	41.9476	0	30.3615	-7.54458	2.7027e-08	1.29342e-07
LOC106991652	25.5155	95.5586	93.2784	0	1.11952	0	71.4508	0.373173	7.49959	2.78326e-08	1.33044e-07
NHLRC3	294.959	358.75	386.559	16.4491	11.1952	74.6872	346.756	34.1105	3.33847	2.80907e-08	1.34226e-07
CHRNA3	278.629	88.2702	85.7153	11.7494	5.5976	20.4622	150.871	12.6031	3.57219	2.81127e-08	1.34305e-07
-	1.02062	4.04909	8.40346	63.4466	76.1273	38.8783	4.49106	59.4841	-3.69302	2.93313e-08	1.39805e-07
LOC105611203	174.526	144.148	91.5977	2.34988	22.3904	4.09245	136.757	9.61091	3.83215	2.98244e-08	1.41917e-07
KLF13	163.299	136.859	91.5977	1.17494	5.5976	20.4622	130.585	9.07826	3.82386	3.13125e-08	1.48651e-07
-	570.526	595.217	587.402	42.2978	24.6294	147.328	584.381	71.4184	3.02879	3.14645e-08	1.49287e-07
LOC106991851	50.0103	51.0186	31.0928	2.34988	4.47808	2.04622	44.0406	2.95806	3.90111	3.2342e-08	1.53217e-07
C1H3orf80	62.2577	76.9328	68.068	9.3995	1.11952	11.2542	69.0862	7.25775	3.24362	3.73843e-08	1.75634e-07
AHSP	12.2474	8.09818	2.52104	110.444	58.215	57.2943	7.62221	75.3178	-3.32438	4.02591e-08	1.88676e-07
SLC6A5	39.8041	104.467	133.615	10.5744	5.5976	1.02311	92.6286	5.73172	4.03869	4.2848e-08	2.00094e-07
FOXJ1	24.4948	34.8222	107.564	1310.06	2467.42	520.764	55.6271	1432.75	-4.68538	4.36453e-08	2.03703e-07
LOC105606063	68.3814	50.2087	56.3032	3.52481	0	8.1849	58.2978	3.90324	3.87154	4.44162e-08	2.07106e-07
LOC105608607	56.134	84.2211	160.506	9.3995	8.95616	17.3929	100.287	11.9162	3.0666	4.46453e-08	2.08104e-07
-	16.3299	12.1473	8.40346	75.196	66.0517	266.009	12.2935	135.752	-3.47373	4.52404e-08	2.10713e-07
TMEM131	836.907	729.646	644.545	51.6973	16.7928	156.536	737.033	75.0087	3.29362	4.614e-08	2.14582e-07
RSPH4A	3.06186	8.908	21.0087	121.019	141.059	71.6178	10.9928	111.232	-3.32099	4.81438e-08	2.23525e-07
-	18.3711	38.0615	52.9418	0	0	0	36.4581	0	7.49124	4.89358e-08	2.2699e-07
-	38.7835	55.8775	45.3787	7.04963	2.23904	5.11556	46.6799	4.80141	3.28857	5.62763e-08	2.58725e-07
LOC105609523	94.9175	50.2087	63.8663	1.17494	7.83664	10.2311	69.6642	6.41423	3.41797	5.92726e-08	2.71848e-07
LOC106991661	33.6804	23.4847	32.7735	0	0	0	29.9795	0	7.20418	5.97698e-08	2.74078e-07
LOC105602396	153.093	135.24	142.018	11.7494	3.35856	30.6934	143.45	15.2671	3.21979	6.17512e-08	2.82539e-07
CHRNA2	253.113	31.5829	31.9332	1.17494	0	2.04622	105.543	1.07372	6.59302	6.33362e-08	2.89313e-07
ZNF891	66.3402	53.448	52.9418	3.52481	12.3147	4.09245	57.5767	6.64399	3.11691	6.48807e-08	2.95988e-07
LOC105602825	50.0103	41.3007	46.219	0	1.11952	0	45.8434	0.373173	6.85553	6.5511e-08	2.98699e-07
LOC105615152	38.7835	59.1167	35.2945	0	2.23904	4.09245	44.3983	2.1105	4.35155	6.76563e-08	3.07973e-07
-	43.8866	41.3007	35.2945	3.52481	0	3.06934	40.1606	2.19805	4.18781	7.0053e-08	3.18357e-07
-	1.02062	0	0.840346	42.2978	60.4541	30.6934	0.620322	44.4817	-6.23197	7.03035e-08	3.1924e-07
-	103.082	99.6077	79.8329	9.3995	2.23904	19.4391	94.1743	10.3592	3.16997	7.03069e-08	3.1924e-07
-	1.02062	0.809818	0	14.0993	142.179	75.7103	0.610146	77.3295	-7.02883	7.17776e-08	3.25305e-07
-	36.7423	51.0186	37.8156	1.17494	2.23904	0	41.8588	1.13799	5.24143	7.18038e-08	3.25365e-07
LOC105605367	32.6598	90.6997	45.3787	1.17494	0	0	56.246	0.391646	7.15462	7.19476e-08	3.25898e-07
-	62.2577	53.448	42.0173	2.34988	7.83664	8.1849	52.5743	6.1238	3.08382	7.31868e-08	3.3121e-07
NKX2-4	0	0	0.840346	169.191	6.71712	108.45	0.280115	94.786	-8.22254	7.74957e-08	3.49456e-07
-	71.4433	25.9142	70.5891	0	0	1.02311	55.9822	0.341037	7.14297	8.01998e-08	3.60783e-07
-	72.4639	68.0247	68.9084	2.34988	6.71712	15.3467	69.799	8.13789	3.07583	8.3862e-08	3.76577e-07
CFAP65	9.18557	9.71782	20.1683	93.995	219.426	58.3174	13.0239	123.913	-3.24397	8.41928e-08	3.77926e-07
-	35.7216	59.1167	38.6559	0	3.35856	4.09245	44.4981	2.48367	4.13086	8.65594e-08	3.882e-07
LOC105614969	24.4948	58.3069	21.849	0	0	0	34.8836	0	7.42685	9.25059e-08	4.13825e-07
LOC105605970	105.124	88.2702	88.2363	14.0993	2.23904	18.416	93.8767	11.5848	3.01086	9.26962e-08	4.14601e-07
-	131.66	53.448	59.6646	5.87469	13.4342	9.20801	81.5908	9.50564	3.09481	9.51309e-08	4.25033e-07
LOC106992038	46.9484	34.8222	48.7401	4.69975	2.23904	6.13867	43.5036	4.35915	3.30741	9.81426e-08	4.37625e-07
TM4SF4	8.16495	4.85891	7.56311	70.4963	30.227	82.8721	6.86232	61.1985	-3.16736	1.06049e-07	4.70774e-07
SLC6A1	4148.81	2131.44	2058.85	123.368	42.5418	296.702	2779.7	154.204	4.17127	1.07889e-07	4.78428e-07
-	0	0.809818	0.840346	106.919	12.3147	95.1494	0.550055	71.4612	-6.94693	1.10028e-07	4.8748e-07
LHX6	10.2062	6.47855	11.7648	51.6973	265.326	62.4098	9.48319	126.478	-3.74015	1.11293e-07	4.92381e-07
-	177.588	190.307	176.473	11.7494	6.71712	43.9938	181.456	20.8201	3.11252	1.13189e-07	5.00062e-07
NR5A2	3.06186	4.04909	4.20173	69.3213	20.1514	72.641	3.77089	54.0379	-3.83249	1.16689e-07	5.14337e-07
-	3.06186	0.809818	2.52104	23.4988	53.7369	37.8551	2.1309	38.3636	-4.20507	1.19727e-07	5.2689e-07
LOC105616740	63.2783	43.7302	33.6138	1.17494	2.23904	6.13867	46.8741	3.18422	3.84271	1.23257e-07	5.41563e-07
-	32.6598	53.448	45.3787	0	0	3.06934	43.8288	1.02311	5.33462	1.24121e-07	5.45165e-07
-	0	7.28837	7.56311	62.2717	48.1393	96.1725	4.95049	68.8612	-3.7594	1.24495e-07	5.46616e-07
FAM167B	6.12371	4.85891	11.7648	88.1203	80.6054	34.7858	7.58249	67.8372	-3.15467	1.34636e-07	5.88855e-07
LOC101108035	424.577	331.216	338.659	17.6241	3.35856	63.4329	364.817	28.1385	3.68994	1.39582e-07	6.09308e-07
GDNF	41.8454	57.4971	36.1349	3.52481	3.35856	7.16178	45.1591	4.68172	3.25383	1.42365e-07	6.21022e-07
ODF3B	1.02062	1.61964	3.36138	46.9975	127.625	17.3929	2.00055	64.0052	-4.97733	1.42897e-07	6.22813e-07
GABRD	25.5155	8.908	10.0842	144.517	54.8565	209.738	14.8359	136.371	-3.21658	1.54967e-07	6.7211e-07
VSX2	31.6392	45.3498	55.4628	0	3.35856	0	44.1506	1.11952	5.32115	1.58991e-07	6.88961e-07
LOC105605733	74.5051	53.448	28.5718	0	1.11952	1.02311	52.175	0.714211	6.15232	1.59789e-07	6.91816e-07
LOC101117613	359.258	398.431	350.424	16.4491	20.1514	95.1494	369.371	43.9166	3.06605	1.60892e-07	6.96473e-07
-	38.7835	42.9204	40.3366	1.17494	0	0	40.6802	0.391646	6.68497	1.62079e-07	7.01123e-07
-	0	0	0	30.5484	26.8685	16.3698	0	24.5956	-7.23603	1.62806e-07	7.03777e-07
LOC105614882	55.1134	42.1106	28.5718	3.52481	0	1.02311	41.9319	1.51598	4.82156	1.69165e-07	7.30124e-07
LOC106991605	160.237	172.491	152.943	23.4988	1.11952	22.5085	161.89	15.7089	3.36399	1.71609e-07	7.3965e-07
STMND1	2.04124	4.04909	5.88242	36.4231	109.713	33.7627	3.99092	59.9662	-3.88872	1.72521e-07	7.43319e-07
ACTL8	3.06186	0.809818	1.68069	21.1489	45.9003	40.9245	1.85079	35.9912	-4.33177	1.79372e-07	7.71503e-07
LOC105613198	30.6186	31.5829	19.328	0	0	0	27.1765	0	7.06323	1.79861e-07	7.73168e-07
LOC105603522	25.5155	21.8651	31.9332	0	0	0	26.4379	0	7.02446	1.80278e-07	7.74732e-07
-	46.9484	37.2516	47.8997	2.34988	0	0	44.0333	0.783292	5.89439	2.03479e-07	8.69335e-07
LOC105603685	59.1959	37.2516	32.7735	0	1.11952	0	43.0737	0.373173	6.76337	2.04294e-07	8.72536e-07
LOC105611988	47.9691	75.3131	51.2611	4.69975	1.11952	10.2311	58.1811	5.35013	3.42344	2.04318e-07	8.72536e-07
FLT4	93.8969	144.148	207.565	21.1489	3.35856	25.5778	148.537	16.6951	3.15058	2.09735e-07	8.9468e-07
LOC101117946	17.3505	8.908	22.6893	195.04	39.1832	607.729	16.316	280.65	-4.10651	2.15362e-07	9.16644e-07
PITX2	7.14433	7.28837	10.9245	424.153	25.749	93.1032	8.4524	181.002	-4.41752	2.15866e-07	9.18629e-07
LOC105612301	29.5979	29.9633	19.328	0	0	0	26.2964	0	7.01568	2.20496e-07	9.37531e-07
LOC105605563	80.6289	38.0615	41.177	2.34988	1.11952	7.16178	53.2891	3.54373	3.87824	2.23188e-07	9.48331e-07
-	184.732	248.614	160.506	29.3734	3.35856	34.7858	197.951	22.5059	3.13425	2.25969e-07	9.59328e-07
TTC24	2.04124	2.42946	3.36138	34.0732	29.1075	30.6934	2.61069	31.2914	-3.57003	2.3402e-07	9.91985e-07
LOC105607869	42.866	31.5829	33.6138	2.34988	0	2.04622	36.0209	1.46537	4.61408	2.34799e-07	9.94949e-07
PAX7	195.959	34.0124	31.0928	0	0	2.04622	87.0213	0.682075	6.91266	2.53716e-07	1.06983e-06
LOC106991941	23.4742	60.7364	47.0594	0	1.11952	2.04622	43.7567	1.05525	5.32735	2.55825e-07	1.07781e-06
LOC106991258	46.9484	39.6811	31.9332	0	0	1.02311	39.5209	0.341037	6.64068	2.6258e-07	1.10496e-06
LOC105611167	32.6598	41.3007	30.2525	2.34988	1.11952	3.06934	34.7377	2.17958	3.98351	2.69986e-07	1.13401e-06
LOC105605770	80.6289	126.332	119.329	1.17494	6.71712	20.4622	108.763	9.45143	3.50456	2.71069e-07	1.13818e-06
-	0	2.42946	1.68069	35.2481	23.5099	38.8783	1.37005	32.5454	-4.49605	2.76443e-07	1.1598e-06
LOC105602344	39.8041	21.8651	20.1683	0	0	0	27.2792	0	7.0655	2.82468e-07	1.18206e-06
LOC106991779	81.6495	128.761	81.5136	1.17494	14.5538	15.3467	97.3081	10.3585	3.21941	2.85113e-07	1.19212e-06
SELP	78.5876	34.0124	42.8577	5.87469	6.71712	3.06934	51.8192	5.22038	3.31765	3.17261e-07	1.31725e-06
-	38.7835	42.1106	43.698	4.69975	0	5.11556	41.5307	3.27177	3.65744	3.17703e-07	1.31864e-06
LOC105604911	19.3918	34.0124	23.5297	0	0	0	25.6446	0	6.98323	3.19053e-07	1.32403e-06
TBX19	0	1.61964	0	36.4231	35.8246	33.7627	0.539879	35.3368	-5.92331	3.2684e-07	1.35498e-06
LOC101109556	2.04124	1.61964	2.52104	41.1228	61.5736	17.3929	2.06064	40.0298	-4.27951	3.38986e-07	1.40137e-06
LOC101105114	1.02062	2.42946	0	213.839	11.1952	42.9707	1.15002	89.3349	-6.26282	3.46325e-07	1.42971e-06
FAM216B	4.08247	8.09818	45.3787	708.488	959.428	356.043	19.1864	674.653	-5.13185	3.4788e-07	1.43528e-06
-	18.3711	24.2946	33.6138	0	0	0	25.4265	0	6.97059	3.6016e-07	1.48349e-06
-	23.4742	43.7302	55.4628	0	1.11952	2.04622	40.8891	1.05525	5.22887	3.67521e-07	1.5118e-06
RAB19	4.08247	3.23927	6.72277	30.5484	52.6174	37.8551	4.68151	40.3403	-3.10419	3.71199e-07	1.52618e-06
DNAI2	3.06186	4.85891	6.72277	97.5198	77.2469	20.4622	4.88118	65.0763	-3.72113	3.73775e-07	1.53626e-06
SKP2	184.732	173.301	152.943	21.1489	3.35856	36.832	170.325	20.4465	3.05193	3.81888e-07	1.56702e-06
LOC101107852	3.06186	0	2.52104	37.598	49.2589	23.5316	1.86096	36.7962	-4.35478	4.02519e-07	1.64679e-06
TSHB	0	0	0.840346	1601.44	30.227	162.675	0.280115	598.114	-10.8803	4.16151e-07	1.69865e-06
-	3.06186	0.809818	0	38.773	21.2709	48.0863	1.29056	36.0434	-4.90225	4.40511e-07	1.79367e-06
LOC106991948	50.0103	51.0186	26.8911	1.17494	0	1.02311	42.64	0.732683	5.8582	4.53138e-07	1.84178e-06
LOC105603858	37.7629	42.1106	26.8911	0	1.11952	2.04622	35.5882	1.05525	5.02299	4.90769e-07	1.98823e-06
LOC105605155	37.7629	38.0615	42.0173	0	0	2.04622	39.2806	0.682075	5.75175	4.94038e-07	2.00082e-06
LOC105602782	41.8454	37.2516	29.4121	0	0	1.02311	36.1697	0.341037	6.51317	5.02404e-07	2.03239e-06
LOC105616648	41.8454	51.0186	27.7314	4.69975	0	2.04622	40.1984	2.24866	4.1797	5.12192e-07	2.07031e-06
LOC105601887	35.7216	36.4418	37.8156	3.52481	0	0	36.6597	1.17494	5.03873	5.39837e-07	2.17781e-06
LOC105609021	12.2474	29.1535	48.7401	0	0	0	30.047	0	7.21232	5.44985e-07	2.19751e-06
-	60.2165	77.7426	33.6138	0	0	6.13867	57.191	2.04622	4.74281	5.6465e-07	2.27312e-06
LOC106991724	0	0.809818	1.68069	9.3995	218.306	31.7165	0.83017	86.4741	-6.65042	5.8405e-07	2.34894e-06
-	79.6082	80.9818	71.4294	2.34988	5.5976	18.416	77.3398	8.78783	3.11412	5.97487e-07	2.39988e-06
LOC105613013	37.7629	35.632	42.0173	0	0	2.04622	38.4707	0.682075	5.72171	6.15253e-07	2.46646e-06
-	25.5155	67.2149	31.9332	0	0	1.02311	41.5545	0.341037	6.71816	6.36985e-07	2.54784e-06
GIPR	10.2062	237.277	258.827	10.5744	5.5976	4.09245	168.77	6.75483	4.65095	6.41322e-07	2.56395e-06
DPYS	12.2474	1.61964	7.56311	70.4963	60.4541	49.1094	7.14339	60.0199	-3.10072	6.90479e-07	2.75075e-06
-	0	3.23927	9.24381	65.7965	209.35	35.8089	4.16103	103.652	-4.61207	7.05037e-07	2.80471e-06
GPR107	849.155	883.512	896.649	66.9715	22.3904	224.062	876.439	104.474	3.06638	7.17344e-07	2.85048e-06
LOC105612395	40.8247	44.54	28.5718	0	1.11952	1.02311	37.9788	0.714211	5.69566	7.43885e-07	2.94842e-06
LOC105615566	30.6186	43.7302	41.177	0	0	2.04622	38.5086	0.682075	5.72632	7.65391e-07	3.02932e-06
-	39.8041	52.6382	36.1349	0	1.11952	6.13867	42.8591	2.4194	4.09261	8.01687e-07	3.16592e-06
LOC106991032	25.5155	42.1106	34.4542	2.34988	3.35856	3.06934	34.0267	2.92592	3.53885	8.31131e-07	3.27234e-06
SHISA9	205.144	206.504	168.069	19.9739	1.11952	33.7627	193.239	18.2854	3.3961	8.61699e-07	3.3884e-06
LOC101112474	5.10309	1.61964	2.52104	57.572	47.0198	19.4391	3.08126	41.3436	-3.78026	8.74622e-07	3.43434e-06
LRRC23	4.08247	6.47855	30.2525	343.082	832.923	164.721	13.6045	446.909	-5.03287	8.82729e-07	3.46235e-06
THBS4	15.3093	8.09818	12.6052	630.942	41.4222	64.4561	12.0042	245.607	-4.35811	8.94184e-07	3.50397e-06
-	29.5979	13.7669	28.5718	0	0	0	23.9789	0	6.88102	9.22586e-07	3.60845e-06
NPAS4	9.18557	7.28837	2.52104	44.6476	38.0637	138.12	6.33166	73.6105	-3.55437	9.255e-07	3.61928e-06
LOC101107080	322.515	378.185	357.987	25.8486	6.71712	82.8721	352.896	38.4793	3.19209	9.27417e-07	3.62621e-06
LOC105602254	1.02062	1.61964	2.52104	35.2481	27.988	21.4854	1.72043	28.2405	-4.00915	9.95125e-07	3.87088e-06
-	37.7629	30.7731	29.4121	0	0	1.02311	32.6494	0.341037	6.36519	1.00857e-06	3.92074e-06
FAM205A	51.0309	30.7731	25.2104	1.17494	0	0	35.6715	0.391646	6.4909	1.02148e-06	3.96844e-06
BEND3	45.9278	42.9204	46.219	1.17494	0	7.16178	45.0224	2.77891	3.97085	1.05063e-06	4.0785e-06
NMS	1.02062	0	0.840346	19.9739	106.354	23.5316	0.620322	49.9533	-6.39048	1.08884e-06	4.21631e-06
NPSR1	6.12371	4.04909	10.9245	131.593	24.6294	82.8721	7.03243	79.6982	-3.50037	1.08928e-06	4.21735e-06
-	4.08247	0.809818	0	23.4988	137.701	28.6471	1.63076	63.2823	-5.35443	1.09671e-06	4.24548e-06
RSPO2	115.33	337.694	527.737	30.5484	5.5976	53.2018	326.921	29.7826	3.45372	1.10143e-06	4.26309e-06
LOC105603670	22.4536	25.1044	16.8069	0	0	0	21.455	0	6.72294	1.1277e-06	4.35799e-06
BCL2	219.433	229.988	189.918	15.2742	3.35856	48.0863	213.113	22.2397	3.25229	1.14609e-06	4.42424e-06
LOC106991890	43.8866	38.0615	40.3366	5.87469	0	5.11556	40.7616	3.66342	3.47316	1.20089e-06	4.62215e-06
ZNF469	51.0309	88.2702	93.2784	1.17494	0	11.2542	77.5265	4.14306	4.19181	1.25844e-06	4.83099e-06
LOC105615397	40.8247	55.8775	17.6473	2.34988	1.11952	2.04622	38.1165	1.83854	4.37482	1.35905e-06	5.19716e-06
CFAP77	2.04124	0.809818	9.24381	78.7208	134.342	24.5547	4.03162	79.206	-4.28466	1.47023e-06	5.59481e-06
XIRP1	15.3093	29.9633	20.1683	0	0	0	21.8136	0	6.75029	1.48005e-06	5.63047e-06
-	17.3505	21.8651	21.849	0	0	0	20.3549	0	6.64887	1.5077e-06	5.72954e-06
LOC105603914	29.5979	31.5829	30.2525	0	0	1.02311	30.4778	0.341037	6.26818	1.51881e-06	5.76823e-06
LOC106991419	60.2165	21.8651	27.7314	1.17494	1.11952	2.04622	36.6043	1.44689	4.6392	1.52622e-06	5.79285e-06
-	52.0515	34.0124	27.7314	2.34988	0	0	37.9318	0.783292	5.67315	1.53869e-06	5.83927e-06
FAM196B	56.134	62.356	73.9505	7.04963	0	11.2542	64.1468	6.10129	3.3815	1.54963e-06	5.87991e-06
-	3.06186	1.61964	1.68069	15.2742	39.1832	48.0863	2.12073	34.1812	-4.0412	1.57183e-06	5.9578e-06
-	81.6495	70.4542	58.8242	7.04963	1.11952	15.3467	70.3093	7.83861	3.14809	1.57814e-06	5.97898e-06
SIX2	3.06186	4.04909	2.52104	963.449	14.5538	156.536	3.21066	378.18	-6.8784	1.61029e-06	6.08689e-06
CNNM4	156.155	153.866	189.918	10.5744	2.23904	36.832	166.646	16.5485	3.32145	1.61082e-06	6.08796e-06
LOC106991723	36.7423	49.3989	19.328	1.17494	0	0	35.1564	0.391646	6.47398	1.61759e-06	6.11169e-06
-	33.6804	33.2026	34.4542	2.34988	5.5976	4.09245	33.7791	4.01331	3.0665	1.6657e-06	6.28391e-06
-	2.04124	0	4.20173	22.3238	110.832	33.7627	2.08099	55.6397	-4.74817	1.66707e-06	6.28815e-06
-	23.4742	17.0062	20.1683	0	0	0	20.2162	0	6.63534	1.69486e-06	6.38812e-06
-	14.2887	1.61964	4.20173	78.7208	71.6493	47.0632	6.70334	65.8111	-3.33497	1.69935e-06	6.40213e-06
LOC101114261	2.04124	4.04909	0.840346	66.9715	60.4541	13.3005	2.31023	46.9087	-4.32948	1.70804e-06	6.43197e-06
MC3R	9.18557	1.61964	0.840346	63.4466	27.988	98.2188	3.88185	63.2178	-4.07928	1.80751e-06	6.78806e-06
MLPH	1.02062	3.23927	3.36138	309.009	5.5976	45.0169	2.54043	119.874	-5.54104	1.80882e-06	6.79193e-06
LOC105608589	3.06186	4.04909	21.849	78.7208	254.131	69.5716	9.65332	134.141	-3.78616	1.86219e-06	6.98285e-06
DIO2	114.309	60.7364	48.7401	1145.56	132.103	571.92	74.5952	616.529	-3.04905	1.90013e-06	7.11334e-06
-	103.082	115.804	93.2784	9.3995	0	18.416	104.055	9.27184	3.47726	2.01072e-06	7.50029e-06
LOC101120811	4.08247	1.61964	1.68069	22.3238	35.8246	28.6471	2.46093	28.9319	-3.59954	2.03619e-06	7.59186e-06
RHOD	8.16495	2.42946	2.52104	68.1464	31.3466	33.7627	4.37181	44.4185	-3.38394	2.06557e-06	7.69105e-06
-	2.04124	0.809818	0.840346	16.4491	29.1075	38.8783	1.23047	28.145	-4.56811	2.08137e-06	7.7441e-06
-	48.9897	272.099	513.451	42.2978	17.9123	18.416	278.18	26.2087	3.41156	2.08464e-06	7.75394e-06
LOC105607935	62.2577	37.2516	29.4121	5.87469	0	1.02311	42.9738	2.29927	4.25811	2.0905e-06	7.77456e-06
LOC101108763	20.4124	19.4356	31.9332	95.17	79.4859	706.97	23.9271	293.875	-3.61825	2.10158e-06	7.81398e-06
LOC101119591	97.9794	259.952	279.835	3.52481	40.3027	6.13867	212.589	16.6554	3.67572	2.11298e-06	7.85347e-06
LOC105612524	76.5464	116.614	111.766	2.34988	0	16.3698	101.642	6.23989	4.00206	2.16265e-06	8.02612e-06
-	5.10309	3.23927	5.04208	35.2481	73.8883	23.5316	4.46148	44.2227	-3.31612	2.17295e-06	8.06194e-06
LOC106990716	53.0722	34.0124	26.8911	4.69975	2.23904	5.11556	37.9919	4.01812	3.23195	2.32494e-06	8.59126e-06
LOC105609287	31.6392	29.1535	10.0842	0	0	0	23.6256	0	6.86012	2.33264e-06	8.61819e-06
LOC101122710	37.7629	38.0615	46.219	2.34988	1.11952	8.1849	40.6811	3.88476	3.35705	2.34801e-06	8.67138e-06
BSPH1	13.268	13.7669	28.5718	191.515	36.9442	325.35	18.5356	184.603	-3.31369	2.44408e-06	9.0103e-06
-	20.4124	85.8408	21.849	1.17494	0	0	42.7007	0.391646	6.75709	2.51279e-06	9.25139e-06
FOXG1	1.02062	0	1.68069	24.6737	604.541	63.4329	0.900437	230.882	-8.01386	2.53511e-06	9.32783e-06
LOC105612273	53.0722	32.3927	29.4121	1.17494	0	5.11556	38.2923	2.09683	4.14218	2.55292e-06	9.38634e-06
LOC105616721	40.8247	30.7731	24.37	3.52481	0	2.04622	31.9893	1.85701	4.11519	2.61469e-06	9.60069e-06
LOC105605645	47.9691	31.5829	27.7314	5.87469	2.23904	3.06934	35.7611	3.72769	3.27087	2.62742e-06	9.64601e-06
-	41.8454	28.3436	25.2104	0	3.35856	2.04622	31.7998	1.80159	4.11778	2.6818e-06	9.83695e-06
LOC105611334	26.5361	38.8713	25.2104	0	1.11952	2.04622	30.2059	1.05525	4.78982	2.68669e-06	9.85198e-06
POU1F1	1.02062	3.23927	1.68069	14.0993	55.976	37.8551	1.98019	35.9768	-4.15308	2.77903e-06	1.01711e-05
LOC105610941	20.4124	16.1964	20.1683	0	0	0	18.9257	0	6.54104	2.78259e-06	1.01826e-05
REL	82.6701	32.3927	42.8577	2.34988	8.95616	6.13867	52.6402	5.8149	3.16667	2.89883e-06	1.05893e-05
-	62.2577	46.9695	44.5383	2.34988	0	9.20801	51.2552	3.85263	3.69971	2.95268e-06	1.07766e-05
KRT18	0	0.809818	0	59.9218	6.71712	54.2249	0.269939	40.288	-6.98856	2.99786e-06	1.09318e-05
GATA2	23.4742	20.2455	14.2859	0	0	0	19.3352	0	6.57099	3.00371e-06	1.09468e-05
F10	9.18557	3.23927	5.04208	72.8462	26.8685	45.0169	5.82231	48.2439	-3.07495	3.01087e-06	1.09696e-05
LOC105604012	37.7629	30.7731	28.5718	0	0	2.04622	32.3692	0.682075	5.47278	3.0762e-06	1.11995e-05
POU4F1	28.5773	38.0615	63.8663	4.69975	0	5.11556	43.5017	3.27177	3.72725	3.08425e-06	1.12255e-05
-	13.268	1.61964	5.88242	129.243	111.952	26.6009	6.92337	89.2654	-3.71297	3.10045e-06	1.12812e-05
LOC105609567	25.5155	21.8651	12.6052	0	0	0	19.9952	0	6.61911	3.20015e-06	1.16303e-05
-	56.134	28.3436	26.0507	1.17494	0	4.09245	36.8428	1.7558	4.34429	3.24524e-06	1.17873e-05
DIO3	2.04124	0	0	48.1725	19.0318	29.6702	0.680412	32.2915	-5.7385	3.26556e-06	1.18577e-05
LOC106991501	31.6392	31.5829	25.2104	0	3.35856	2.04622	29.4775	1.80159	4.01062	3.37768e-06	1.22327e-05
LOC101111846	48.9897	34.8222	25.2104	4.69975	4.47808	1.02311	36.3408	3.40031	3.43823	3.38291e-06	1.22498e-05
LOC105611820	26.5361	25.1044	31.0928	0	0	1.02311	27.5778	0.341037	6.12377	3.41563e-06	1.23629e-05
LOC101121199	2.04124	3.23927	6.72277	54.0471	69.4102	18.416	4.00109	47.2911	-3.54304	3.43098e-06	1.2413e-05
LOC101105437	28.5773	18.6258	180.674	4826.64	3638.44	709.017	75.9592	3058.03	-5.33063	3.47155e-06	1.25507e-05
LOC101102326	33.6804	21.0553	29.4121	1.17494	0	0	28.0493	0.391646	6.14539	3.819e-06	1.3741e-05
-	6.12371	1.61964	5.04208	117.494	11.1952	92.0801	4.26181	73.5897	-4.12628	3.8214e-06	1.37457e-05
-	18.3711	59.9266	52.1015	0	4.47808	3.06934	43.4664	2.51581	4.09613	3.8745e-06	1.39165e-05
KRT8	4.08247	2.42946	10.9245	305.484	23.5099	706.97	5.81214	345.321	-5.89054	3.89557e-06	1.39842e-05
LOC105609508	20.4124	17.0062	16.8069	0	0	0	18.0752	0	6.47431	3.96876e-06	1.42325e-05
LMX1A	43.8866	239.706	297.483	19.9739	5.5976	29.6702	193.692	18.4139	3.39248	3.98516e-06	1.42852e-05
LOC106991342	66.3402	34.8222	19.328	3.52481	2.23904	0	40.1635	1.92128	4.4216	4.02033e-06	1.43967e-05
LOC106991483	16.3299	22.6749	15.9666	0	0	0	18.3238	0	6.49705	4.11247e-06	1.4714e-05
POSTN	10.2062	10.5276	18.4876	132.768	21.2709	400.037	13.0738	184.692	-3.81878	4.14472e-06	1.48187e-05
LOC105612793	0	0	0	19.9739	25.749	9.20801	0	18.3103	-6.81024	4.20147e-06	1.50151e-05
-	52.0515	47.7793	156.304	10.5744	5.5976	15.3467	85.3784	10.5062	3.01813	4.36558e-06	1.55659e-05
TNFRSF18	2.04124	4.04909	0.840346	48.1725	87.3225	11.2542	2.31023	48.9164	-4.39176	4.40878e-06	1.57132e-05
TSPAN1	5.10309	4.85891	2.52104	43.4727	42.5418	20.4622	4.16101	35.4922	-3.0987	4.43062e-06	1.57888e-05
HDAC4	300.062	274.528	278.155	16.4491	6.71712	75.7103	284.248	32.9588	3.10191	4.59156e-06	1.63319e-05
LHX3	3.06186	2.42946	8.40346	148.042	22.3904	41.9476	4.63159	70.7934	-3.92511	4.61033e-06	1.63963e-05
CLEC1B	0	0	0	15.2742	52.6174	7.16178	0	25.0178	-7.26173	4.64846e-06	1.65201e-05
ZBTB46	79.6082	75.3131	64.7066	7.04963	0	14.3236	73.2093	7.1244	3.3463	4.76657e-06	1.69085e-05
-	29.5979	17.0062	12.6052	0	0	0	19.7364	0	6.59828	4.80083e-06	1.70252e-05
LOC106991129	45.9278	33.2026	56.3032	1.17494	5.5976	9.20801	45.1445	5.32685	3.05847	4.81651e-06	1.70735e-05
LOC105615721	45.9278	43.7302	24.37	5.87469	0	2.04622	38.0094	2.6403	3.86898	4.85872e-06	1.7211e-05
-	40.8247	42.9204	44.5383	3.52481	0	8.1849	42.7612	3.90324	3.42823	4.91179e-06	1.73939e-05
SLC10A1	28.5773	25.1044	27.7314	1.17494	0	2.04622	27.1377	1.07372	4.62807	4.92387e-06	1.74292e-05
LOC105608432	50.0103	20.2455	35.2945	2.34988	0	0	35.1834	0.783292	5.56141	4.92958e-06	1.74469e-05
DEPTOR	25.5155	28.3436	42.0173	0	2.23904	4.09245	31.9588	2.1105	3.88017	4.94074e-06	1.7484e-05
LOC101118607	7.14433	1.61964	6.72277	51.6973	107.474	22.5085	5.16224	60.5599	-3.56741	5.07721e-06	1.79439e-05
LOC106990469	37.7629	29.9633	22.6893	1.17494	0	1.02311	30.1385	0.732683	5.35608	5.21652e-06	1.84128e-05
TSHR	1.02062	7.28837	12.6052	225.588	19.0318	125.843	6.97139	123.488	-4.13057	5.31674e-06	1.87506e-05
LOC105602054	30.6186	30.7731	19.328	0	0	1.02311	26.9065	0.341037	6.08679	5.40687e-06	1.90495e-05
TMEM221	12.2474	6.47855	14.2859	264.361	63.8126	34.7858	11.004	120.986	-3.46053	5.44352e-06	1.91732e-05
LOC101107831	14.2887	12.1473	18.4876	305.484	49.2589	63.4329	14.9745	139.392	-3.21716	5.72877e-06	2.01125e-05
PRLH	1.02062	0	0	51.6973	4.47808	67.5254	0.340206	41.2336	-7.02265	5.74584e-06	2.01667e-05
STS	39.8041	40.4909	26.8911	0	4.47808	5.11556	35.7287	3.19788	3.45255	6.2645e-06	2.18485e-05
SCD	2812.82	6019.38	4583.25	187.99	94.0397	650.699	4471.82	310.91	3.84593	6.35812e-06	2.21626e-05
LOC106991524	15.3093	20.2455	15.9666	0	0	0	17.1738	0	6.40347	6.3629e-06	2.21762e-05
LOC105609024	20.4124	39.6811	35.2945	0	0	2.04622	31.796	0.682075	5.45548	6.4242e-06	2.23679e-05
-	17.3505	45.3498	42.0173	0	0	3.06934	34.9059	1.02311	5.01697	6.73774e-06	2.33811e-05
PADI1	3.06186	1.61964	3.36138	35.2481	20.1514	25.5778	2.68096	26.9924	-3.34263	7.06312e-06	2.44489e-05
-	4.08247	4.85891	21.849	66.9715	195.916	58.3174	10.2635	107.068	-3.37326	7.20742e-06	2.49207e-05
LOC106990921	45.9278	23.4847	29.4121	1.17494	2.23904	5.11556	32.9416	2.84318	3.50043	7.57359e-06	2.61178e-05
-	155.134	34.0124	45.3787	5.87469	11.1952	8.1849	78.175	8.41826	3.20944	7.58718e-06	2.61611e-05
LOC101117431	7.14433	4.04909	21.0087	246.737	60.4541	909.547	10.734	405.579	-5.23813	7.72308e-06	2.66075e-05
LOC106991284	14.2887	21.8651	15.1262	0	0	0	17.0933	0	6.39736	7.74866e-06	2.66883e-05
HS6ST3	25.5155	38.8713	52.1015	2.34988	0	6.13867	38.8294	2.82952	3.75071	7.79044e-06	2.68248e-05
LOC101112122	52.0515	55.8775	184.876	4.69975	0	13.3005	97.6017	6.00007	4.00907	7.99784e-06	2.74705e-05
-	25.5155	12.1473	15.9666	0	0	0	17.8764	0	6.45551	8.27069e-06	2.83607e-05
-	1.02062	57.4971	76.4715	0	0	0	44.9964	0	7.79321	8.42026e-06	2.88577e-05
LOC105615971	21.433	28.3436	23.5297	0	0	1.02311	24.4354	0.341037	5.95071	8.4448e-06	2.89338e-05
LOC106991478	24.4948	12.9571	15.1262	0	0	0	17.5261	0	6.42716	8.44892e-06	2.8944e-05
LOC105602404	59.1959	47.7793	40.3366	9.3995	0	6.13867	49.1039	5.17939	3.24858	8.86057e-06	3.02543e-05
LOC101123148	6.12371	7.28837	12.6052	179.766	78.3664	20.4622	8.67242	92.8647	-3.41339	8.88715e-06	3.03367e-05
-	25.5155	273.719	33.6138	1.17494	10.0757	2.04622	110.949	4.43228	4.64842	9.08103e-06	3.09518e-05
ARHGAP35	2560.73	2763.1	2775.66	129.243	53.7369	449.146	2699.83	210.709	3.67895	9.26127e-06	3.15359e-05
LOC105602134	33.6804	18.6258	23.5297	1.17494	0	0	25.2786	0.391646	5.99408	9.29271e-06	3.16344e-05
LOC105610544	16.3299	41.3007	30.2525	1.17494	0	2.04622	29.2944	1.07372	4.7458	9.72898e-06	3.30337e-05
PGC	36.7423	39.6811	40.3366	4.69975	8.95616	1.02311	38.92	4.89301	3.00982	9.95069e-06	3.37543e-05
-	2.04124	3.23927	6.72277	64.6216	22.3904	31.7165	4.00109	39.5762	-3.28527	1.00662e-05	3.41182e-05
C1H2orf54	3.06186	4.85891	1.68069	35.2481	23.5099	25.5778	3.20049	28.112	-3.12561	1.03142e-05	3.49206e-05
FAM64A	1.02062	0	3.36138	21.1489	31.3466	25.5778	1.46067	26.0244	-4.14935	1.0384e-05	3.51426e-05
MESP2	13.268	21.0553	10.0842	722.587	615.736	30.6934	14.8025	456.339	-4.94495	1.04677e-05	3.5402e-05
LOC105616534	12.2474	21.8651	15.9666	0	0	0	16.693	0	6.36414	1.06029e-05	3.58445e-05
ZNF280B	79.6082	131.191	88.2363	4.69975	4.47808	27.624	99.6784	12.2673	3.00724	1.08444e-05	3.66111e-05
LOC105610497	22.4536	30.7731	19.328	83.4206	579.911	66.5023	24.1849	243.278	-3.32928	1.09123e-05	3.68156e-05
P2RX3	32.6598	38.8713	26.8911	5.87469	0	2.04622	32.8074	2.6403	3.65888	1.10293e-05	3.71951e-05
LOC105615278	14.2887	13.7669	21.0087	0	0	0	16.3547	0	6.3325	1.10615e-05	3.72887e-05
LOC105602685	16.3299	25.1044	10.9245	0	0	0	17.4529	0	6.42648	1.11301e-05	3.74946e-05
LOC105609947	27.5567	18.6258	25.2104	0	1.11952	0	23.7976	0.373173	5.90864	1.12536e-05	3.78847e-05
LOC105603284	1.02062	0.809818	4.20173	41.1228	57.0955	12.2773	2.01072	36.8319	-4.17526	1.1493e-05	3.86543e-05
LOC105605957	13.268	14.5767	21.0087	0	0	0	16.2845	0	6.32696	1.16176e-05	3.90625e-05
GJB7	4.08247	0.809818	0	93.995	10.0757	42.9707	1.63076	49.0138	-4.98135	1.16358e-05	3.91135e-05
LOC105604647	48.9897	43.7302	8.40346	0	0	1.02311	33.7078	0.341037	6.41122	1.16889e-05	3.92845e-05
-	235.763	148.197	16.8069	4.69975	3.35856	17.3929	133.589	8.48374	3.96513	1.18988e-05	3.99381e-05
BARHL2	5.10309	0	1.68069	77.5459	17.9123	34.7858	2.26126	43.4147	-4.32493	1.19151e-05	3.99873e-05
MIR125B	19.3918	31.5829	21.0087	0	1.11952	0	23.9944	0.373173	5.9253	1.20821e-05	4.05317e-05
CD274	48.9897	56.6873	53.7822	9.3995	0	9.20801	53.153	6.2025	3.09622	1.26832e-05	4.24391e-05
PROKR2	20.4124	37.2516	41.177	3.52481	5.5976	2.04622	32.947	3.72288	3.16068	1.28088e-05	4.28479e-05
-	3.06186	1.61964	3.36138	207.964	2.23904	61.3867	2.68096	90.5299	-5.08285	1.28315e-05	4.29123e-05
-	0	0	5.88242	30.5484	139.94	29.6702	1.96081	66.7195	-5.05982	1.29424e-05	4.32252e-05
LOC105606936	19.3918	13.7669	14.2859	0	0	0	15.8148	0	6.2805	1.30872e-05	4.36736e-05
LOC106991738	0	0	0	3.52481	61.5736	15.3467	0	26.815	-7.36303	1.36471e-05	4.53963e-05
FGF2	29.5979	42.1106	30.2525	2.34988	0	6.13867	33.987	2.82952	3.55659	1.48798e-05	4.92858e-05
LOC101111980	0	0	0	111.619	2.23904	8.1849	0	40.681	-7.96281	1.51836e-05	5.02521e-05
LOC105602076	2.04124	3.23927	6.72277	46.9975	35.8246	20.4622	4.00109	34.4281	-3.08202	1.5262e-05	5.04644e-05
-	15.3093	17.0062	13.4455	0	0	0	15.2537	0	6.23113	1.55872e-05	5.14441e-05
PCDH19	289.856	288.295	242.86	14.0993	3.35856	68.5485	273.67	28.6688	3.24846	1.56171e-05	5.15223e-05
ZNF516	154.113	166.013	143.699	21.1489	0	25.5778	154.608	15.5756	3.30839	1.60538e-05	5.2879e-05
LOC106990335	40.8247	25.9142	42.8577	0	4.47808	6.13867	36.5322	3.53892	3.33731	1.60886e-05	5.29725e-05
-	0	0	0.840346	28.1985	33.5856	9.20801	0.280115	23.664	-6.21806	1.61893e-05	5.32618e-05
ONECUT3	0	0	0.840346	24.6737	14.5538	20.4622	0.280115	19.8966	-5.96999	1.61947e-05	5.32725e-05
LOC105611892	17.3505	24.2946	26.0507	0	0	1.02311	22.5653	0.341037	5.83682	1.63092e-05	5.36279e-05
-	35.7216	27.5338	21.849	1.17494	0	4.09245	28.3682	1.7558	3.96774	1.66739e-05	5.47404e-05
PITX1	3.06186	2.42946	0	128.068	10.0757	27.624	1.83044	55.256	-4.93849	1.67075e-05	5.4829e-05
CD226	24.4948	17.0062	9.24381	0	0	0	16.9149	0	6.37638	1.737e-05	5.68683e-05
LOC106991875	29.5979	21.0553	17.6473	0	0	1.02311	22.7668	0.341037	5.84358	1.73945e-05	5.69409e-05
LOC106991377	28.5773	19.4356	19.328	0	1.11952	0	22.447	0.373173	5.82324	1.76818e-05	5.78207e-05
-	3.06186	4.85891	2.52104	32.8983	47.0198	16.3698	3.4806	32.096	-3.19339	1.78092e-05	5.82142e-05
LOC105616095	24.4948	38.0615	18.4876	2.34988	2.23904	0	27.0146	1.52964	4.18459	1.80824e-05	5.90609e-05
-	19.3918	33.2026	22.6893	2.34988	0	1.02311	25.0946	1.12433	4.50586	1.84555e-05	6.02242e-05
ZNF697	106.144	91.5095	92.4381	11.7494	0	19.4391	96.6973	10.3962	3.20926	1.86648e-05	6.08513e-05
-	2.04124	4.04909	1.68069	65.7965	45.9003	9.20801	2.59034	40.3016	-3.94364	1.86755e-05	6.08783e-05
BARD1	30.6186	38.8713	23.5297	2.34988	0	5.11556	31.0065	2.48848	3.61135	1.91367e-05	6.22918e-05
LOC105606047	28.5773	19.4356	18.4876	1.17494	0	0	22.1669	0.391646	5.805	1.97737e-05	6.42541e-05
LOC105616681	21.433	9.71782	16.8069	0	0	0	15.9859	0	6.2949	1.98666e-05	6.45329e-05
LOC105607632	17.3505	38.8713	16.8069	0	0	1.02311	24.3429	0.341037	5.94672	2.12096e-05	6.86711e-05
LOC101102366	26.5361	22.6749	21.0087	1.17494	0	2.04622	23.4065	1.07372	4.41464	2.12528e-05	6.88023e-05
PEBP4	25.5155	7.28837	21.849	140.993	34.7051	322.28	18.2176	165.993	-3.19404	2.14251e-05	6.93329e-05
LOC105606976	31.6392	38.8713	15.9666	3.52481	0	1.02311	28.8257	1.51598	4.27953	2.15761e-05	6.9767e-05
P2RX2	0	3.23927	5.88242	77.5459	27.988	24.5547	3.04057	43.3629	-3.79409	2.22479e-05	7.17715e-05
-	34.701	23.4847	21.849	0	0	3.06934	26.6783	1.02311	4.62044	2.23761e-05	7.2157e-05
LOC106991495	15.3093	13.7669	14.2859	0	0	0	14.454	0	6.15254	2.2545e-05	7.2636e-05
LOC105616620	29.5979	36.4418	16.8069	1.17494	3.35856	0	27.6156	1.51117	4.21872	2.31581e-05	7.44667e-05
LOC105602951	38.7835	20.2455	30.2525	2.34988	4.47808	4.09245	29.7605	3.64013	3.01871	2.31936e-05	7.45712e-05
-	1.02062	0.809818	5.04208	21.1489	94.0397	18.416	2.29084	44.5349	-4.26343	2.33466e-05	7.50244e-05
LOC105614664	40.8247	68.0247	53.7822	11.7494	0	5.11556	54.2105	5.62165	3.28199	2.35616e-05	7.56664e-05
LOC105615388	36.7423	15.3866	36.9752	0	0	3.06934	29.7013	1.02311	4.77991	2.45477e-05	7.86405e-05
LOC105607961	18.3711	12.9571	12.6052	0	0	0	14.6445	0	6.16933	2.4581e-05	7.87369e-05
LOC105606280	0	1.61964	0	34.0732	13.4342	25.5778	0.539879	24.3617	-5.3968	2.46397e-05	7.8915e-05
LOC105616311	13.268	13.7669	15.9666	0	0	0	14.3338	0	6.14195	2.47316e-05	7.91888e-05
CLDN7	0	0	0.840346	303.134	11.1952	33.7627	0.280115	116.031	-8.51416	2.47889e-05	7.93622e-05
LOC105602357	26.5361	23.4847	15.1262	0	0	1.02311	21.7157	0.341037	5.77654	2.49348e-05	7.97597e-05
-	31.6392	15.3866	36.9752	0	0	2.04622	28.0003	0.682075	5.27036	2.55982e-05	8.17534e-05
RAB25	0	0	0	68.1464	5.5976	6.13867	0	26.6276	-7.35041	2.59299e-05	8.27539e-05
-	13.268	42.1106	19.328	1.17494	0	0	24.9022	0.391646	5.98052	2.61367e-05	8.33769e-05
LOC105615485	38.7835	12.9571	21.0087	1.17494	0	0	24.2497	0.391646	5.93264	2.64125e-05	8.42221e-05
-	817.515	753.941	789.085	37.598	6.71712	107.427	786.847	50.5806	3.95762	2.69033e-05	8.56906e-05
LOC106990153	11.2268	83.4113	75.6311	4.69975	4.47808	6.13867	56.7564	5.1055	3.47423	2.71995e-05	8.65123e-05
-	1.02062	2.42946	1.68069	14.0993	71.6493	15.3467	1.71026	33.6984	-4.27676	2.75946e-05	8.76956e-05
LOC105616775	24.4948	25.9142	22.6893	0	2.23904	0	24.3661	0.746347	5.04726	2.77046e-05	8.80289e-05
LOC105613980	22.4536	24.2946	15.9666	0	0	1.02311	20.9049	0.341037	5.72333	2.78817e-05	8.85691e-05
VAX1	0	0.809818	0	9.3995	21.2709	32.7396	0.269939	21.1367	-6.06138	2.81293e-05	8.92985e-05
NTN1	460.299	662.431	831.102	34.0732	4.47808	78.7796	651.278	39.1103	4.05583	2.82492e-05	8.96677e-05
LOC106991587	16.3299	14.5767	11.7648	0	0	0	14.2238	0	6.1286	2.83141e-05	8.98509e-05
LOC106991745	1.02062	0.809818	1.68069	44.6476	3.35856	68.5485	1.17038	38.8516	-5.05069	2.83629e-05	8.99943e-05
IRS2	109.206	97.1782	73.9505	14.0993	0	17.3929	93.4449	10.4974	3.14911	2.8462e-05	9.02972e-05
-	5.10309	5.66873	1.68069	37.598	86.203	15.3467	4.15084	46.3826	-3.48623	2.91897e-05	9.2382e-05
COL23A1	4.08247	12.9571	5.04208	118.669	21.2709	61.3867	7.36055	67.1088	-3.17353	3.0123e-05	9.5106e-05
-	27.5567	72.0738	36.9752	2.34988	10.0757	2.04622	45.5353	4.82393	3.24697	3.03523e-05	9.57936e-05
LOC101113832	300.062	97.988	155.464	21.1489	2.23904	39.9014	184.505	21.0964	3.12313	3.04825e-05	9.61925e-05
LOC105604319	33.6804	87.4604	33.6138	0	0	7.16178	51.5849	2.38726	4.3873	3.10947e-05	9.8e-05
LOC105609741	0	0.809818	1.68069	36.4231	29.1075	9.20801	0.83017	24.9129	-4.84164	3.13708e-05	9.87828e-05
LOC101113831	4988.78	2620.57	3242.9	279.635	110.832	753.01	3617.42	381.159	3.24615	3.15539e-05	9.93466e-05
-	28.5773	13.7669	21.849	0	0	1.02311	21.3977	0.341037	5.75351	3.29782e-05	0.000103595
VAX2	0	0	1.68069	25.8486	64.9321	8.1849	0.560231	32.9886	-5.82778	3.29869e-05	0.00010361
-	1.02062	0	0	10.5744	47.0198	13.3005	0.340206	23.6316	-6.21843	3.34704e-05	0.000104996
LOC105607674	28.5773	21.8651	21.849	1.17494	3.35856	0	24.0971	1.51117	4.02119	3.35852e-05	0.000105329
LOC106991150	35.7216	21.8651	23.5297	1.17494	4.47808	3.06934	27.0388	2.90745	3.20276	3.37724e-05	0.000105876
LOC105603399	37.7629	52.6382	52.1015	5.87469	0	10.2311	47.5008	5.3686	3.13182	3.40476e-05	0.000106726
LOC106990871	22.4536	29.9633	29.4121	0	0	4.09245	27.2763	1.36415	4.24968	3.44804e-05	0.000108028
LOC105615015	23.4742	14.5767	8.40346	0	0	0	15.4848	0	6.24831	3.57598e-05	0.000111755
LOC105616285	71.4433	93.1291	108.405	2.34988	0	18.416	90.9924	6.92196	3.69616	3.59965e-05	0.000112452
-	30.6186	28.3436	15.1262	2.34988	0	2.04622	24.6961	1.46537	4.07024	3.71894e-05	0.000115946
NEUROD6	19.3918	93.1291	92.4381	11.7494	3.35856	9.20801	68.3196	8.10532	3.07965	3.7282e-05	0.000116205
-	0	0	0.840346	23.4988	22.3904	10.2311	0.280115	18.7068	-5.87863	3.78472e-05	0.000117849
LOC105605187	1.02062	5.66873	0.840346	18.799	44.7808	29.6702	2.5099	31.0833	-3.59359	3.84501e-05	0.000119607
LOC105609624	11.2268	17.816	12.6052	0	0	0	13.8827	0	6.0975	3.85437e-05	0.000119868
LOC105615369	20.4124	24.2946	32.7735	2.34988	4.47808	1.02311	25.8268	2.61702	3.3209	3.87409e-05	0.000120406
-	32.6598	25.9142	14.2859	1.17494	0	2.04622	24.2866	1.07372	4.46806	3.87553e-05	0.000120436
-	15.3093	40.4909	44.5383	0	4.47808	3.06934	33.4462	2.51581	3.71882	3.88307e-05	0.00012064
PROKR1	16.3299	59.1167	68.9084	4.69975	0	6.13867	48.1183	3.61281	3.72867	3.89784e-05	0.000121084
LOC105606895	25.5155	25.1044	24.37	3.52481	1.11952	4.09245	24.9966	2.91226	3.09286	3.91209e-05	0.000121451
LOC106991712	16.3299	17.0062	9.24381	0	0	0	14.1933	0	6.12589	3.943e-05	0.000122334
-	47.9691	13.7669	14.2859	0	1.11952	0	25.3406	0.373173	5.99545	4.0218e-05	0.000124639
NPM2	11.2268	1.61964	7.56311	21.1489	209.35	46.04	6.80318	92.1797	-3.77501	4.0702e-05	0.000125951
LOC105616610	4.08247	64.7855	10.9245	0	0	0	26.5975	0	7.03619	4.08009e-05	0.00012621
TPSB2	3.06186	3.23927	1.68069	22.3238	24.6294	19.4391	2.66061	22.1308	-3.06135	4.08341e-05	0.000126297
RGSL1	6.12371	109.325	155.464	5.87469	3.35856	8.1849	90.3044	5.80605	3.95648	4.12136e-05	0.000127423
LOC105604986	14.2887	15.3866	10.9245	0	0	0	13.5332	0	6.05797	4.17974e-05	0.000129068
LOC105607782	48.9897	22.6749	23.5297	5.87469	2.23904	3.06934	31.7314	3.72769	3.09522	4.25368e-05	0.000131189
POU4F3	5.10309	16.1964	36.1349	0	0	0	19.1448	0	6.56237	4.26183e-05	0.000131424
TMEM238	1.02062	0.809818	2.52104	24.6737	24.6294	13.3005	1.45049	20.8679	-3.831	4.30363e-05	0.000132549
-	16.3299	17.816	24.37	0	1.11952	0	19.5053	0.373173	5.62555	4.32634e-05	0.000133215
LOC105604372	19.3918	24.2946	26.0507	0	2.23904	0	23.2457	0.746347	4.98086	4.37446e-05	0.00013458
LOC101113168	2.04124	0.809818	3.36138	46.9975	8.95616	36.832	2.07081	30.9286	-3.90509	4.42278e-05	0.000135983
LOC105616336	29.5979	21.8651	16.8069	1.17494	0	1.02311	22.7567	0.732683	4.95019	4.50129e-05	0.000138268
KCNG3	30.6186	29.1535	13.4455	2.34988	1.11952	0	24.4059	1.15647	4.44821	4.62196e-05	0.000141734
TEX15	74.5051	37.2516	31.9332	2.34988	0	9.20801	47.8966	3.85263	3.60597	4.67617e-05	0.00014326
LOC105609355	0	0	0	16.4491	11.1952	9.20801	0	12.2841	-6.23438	4.70075e-05	0.000143907
LOC101115112	7.14433	15.3866	23.5297	0	0	0	15.3535	0	6.24447	4.74434e-05	0.000145188
LOC101123029	0	0	1.68069	8.22457	44.7808	28.6471	0.560231	27.2175	-5.55129	4.81048e-05	0.000147103
LOC101118574	25.5155	17.816	28.5718	3.52481	1.11952	0	23.9677	1.54811	4.0036	4.95383e-05	0.000151227
LOC105605139	10.2062	13.7669	15.9666	0	0	0	13.3132	0	6.0371	5.03816e-05	0.000153632
-	3.06186	1.61964	0.840346	17.6241	35.8246	15.3467	1.84061	22.9318	-3.67687	5.17533e-05	0.000157506
LOC105605861	67.3608	4.04909	73.1101	0	1.11952	3.06934	48.1733	1.39629	5.06939	5.24161e-05	0.000159328
LOC105602718	11.2268	12.1473	15.9666	0	0	0	13.1136	0	6.01422	5.33142e-05	0.00016188
-	56.134	21.8651	17.6473	0	1.11952	4.09245	31.8821	1.73732	4.14589	5.36072e-05	0.00016275
LOC105610742	19.3918	14.5767	22.6893	0	0	1.02311	18.8859	0.341037	5.57656	5.44763e-05	0.000165228
-	153.093	141.718	183.195	10.5744	1.11952	40.9245	159.335	17.5395	3.17474	5.44864e-05	0.000165238
LOC105602032	31.6392	18.6258	21.849	3.52481	1.11952	0	24.038	1.54811	4.00494	5.47921e-05	0.000166104
-	68.3814	51.8284	94.9591	0	2.23904	15.3467	71.723	5.86191	3.58709	5.53e-05	0.000167461
-	1.02062	0	0.840346	17.6241	16.7928	20.4622	0.620322	18.293	-4.94809	5.71483e-05	0.00017268
AATK	82.6701	82.6015	85.7153	3.52481	1.11952	22.5085	83.6623	9.05093	3.19012	5.71779e-05	0.000172748
-	326.598	71.264	68.068	991.648	2520.04	1198.06	155.31	1569.92	-3.3388	5.76251e-05	0.00017393
ST6GALNAC1	29.5979	19.4356	21.0087	0	2.23904	3.06934	23.3474	1.76946	3.6813	5.82297e-05	0.000175649
LOC106991098	32.6598	20.2455	16.8069	2.34988	0	2.04622	23.2374	1.46537	3.98006	5.8913e-05	0.000177559
LOC105615544	14.2887	37.2516	13.4455	1.17494	0	0	21.6619	0.391646	5.77873	6.01556e-05	0.000181085
C24H16orf89	24.4948	11.3375	40.3366	427.677	61.5736	1068.13	25.3896	519.127	-4.35413	6.07019e-05	0.000182641
TTN	67.3608	18.6258	9.24381	1.17494	1.11952	1.02311	31.7435	1.10586	4.8405	6.07934e-05	0.000182894
LOC105605743	6.12371	6.47855	3.36138	31.7233	89.5616	17.3929	5.32121	46.2259	-3.1211	6.43636e-05	0.000192889
-	41.8454	12.1473	14.2859	1.17494	0	0	22.7595	0.391646	5.84021	6.43987e-05	0.000192971
LOC106991236	32.6598	25.1044	22.6893	0	4.47808	0	26.8178	1.49269	4.17907	6.50769e-05	0.000194886
-	4.08247	10.5276	3.36138	85.7705	12.3147	83.8952	5.9905	60.6601	-3.32902	6.51245e-05	0.000195005
-	4.08247	0	0.840346	28.1985	60.4541	11.2542	1.64094	33.3023	-4.42138	6.58098e-05	0.000196915
LOC106991773	21.433	14.5767	18.4876	0	1.11952	0	18.1658	0.373173	5.51872	6.67761e-05	0.000199663
SPATC1	54.0928	35.632	29.4121	1.17494	0	8.1849	39.7123	3.11994	3.63038	7.09613e-05	0.00021139
LOC105607824	25.5155	27.5338	20.1683	2.34988	0	4.09245	24.4059	2.14744	3.4825	7.10964e-05	0.000211726
-	39.8041	8.908	6.72277	0	0	0	18.4783	0	6.50152	7.18824e-05	0.000213877
LOC105605915	16.3299	21.0553	25.2104	2.34988	0	1.02311	20.8652	1.12433	4.23876	7.28871e-05	0.000216789
VMO1	34.701	25.9142	33.6138	2402.75	90.6811	256.801	31.4097	916.743	-4.86749	7.34793e-05	0.000218472
-	4.08247	2.42946	0.840346	22.3238	15.6733	32.7396	2.45076	23.5789	-3.30364	7.47145e-05	0.000221906
-	0	0	0.840346	10.5744	23.5099	15.3467	0.280115	16.477	-5.69926	7.55105e-05	0.000224057
LOC105610493	18.3711	14.5767	20.1683	0	0	1.02311	17.7054	0.341037	5.48338	7.59224e-05	0.000225252
-	25.5155	23.4847	10.0842	0	0	1.02311	19.6948	0.341037	5.63545	7.59495e-05	0.000225305
LOC105602784	13.268	17.816	23.5297	0	0	1.02311	18.2046	0.341037	5.52722	7.59689e-05	0.000225336
-	27.5567	16.1964	26.8911	0	0	3.06934	23.548	1.02311	4.44418	7.64887e-05	0.000226743
LOC105611974	24.4948	28.3436	14.2859	0	2.23904	2.04622	22.3748	1.42842	3.93967	7.66009e-05	0.000227021
LOC106991313	10.2062	12.1473	15.1262	0	0	0	12.4932	0	5.94479	7.6667e-05	0.00022719
CAPNS2	20.4124	20.2455	22.6893	0	0	2.04622	21.1157	0.682075	4.86323	7.78419e-05	0.00023048
LOC105614842	12.2474	7.28837	23.5297	0	0	0	14.3552	0	6.14384	7.80424e-05	0.000231018
LOC105608895	13.268	15.3866	9.24381	0	0	0	12.6328	0	5.95885	7.82495e-05	0.000231521
LOC105605938	18.3711	15.3866	18.4876	0	0	1.02311	17.4151	0.341037	5.45943	7.94109e-05	0.000234846
CYP19	1.02062	0.809818	0	9.3995	27.988	22.5085	0.610146	19.9653	-5.07794	8.02472e-05	0.00023715
KRT15	2.04124	0.809818	3.36138	12.9243	6.71712	149.374	2.07081	56.3386	-4.77102	8.08048e-05	0.00023867
RNASE10	41.8454	29.1535	15.1262	0	4.47808	2.04622	28.7083	2.17477	3.70734	8.08095e-05	0.00023867
LOC106990374	24.4948	28.3436	22.6893	2.34988	5.5976	1.02311	25.1759	2.9902	3.08888	8.16998e-05	0.000241042
LOC105602162	25.5155	25.9142	34.4542	0	0	5.11556	28.6279	1.70519	4.00608	8.49883e-05	0.000250063
LOC105602477	14.2887	11.3375	10.9245	0	0	0	12.1835	0	5.90478	8.66119e-05	0.000254509
LOC106991852	18.3711	19.4356	25.2104	0	0	2.04622	21.0057	0.682075	4.85748	9.0957e-05	0.000266272
-	29.5979	33.2026	24.37	1.17494	0	6.13867	29.0568	2.43787	3.5326	9.11676e-05	0.000266825
LOC105604752	20.4124	16.1964	5.88242	0	0	0	14.1637	0	6.12081	9.2218e-05	0.000269773
-	14.2887	27.5338	13.4455	0	0	1.02311	18.4227	0.341037	5.54451	9.37827e-05	0.000273932
ADCYAP1	606.247	135.24	127.733	3832.65	1365.81	4877.17	289.74	3358.55	-3.53561	9.39461e-05	0.000274312
LOC106990837	26.5361	21.8651	18.4876	3.52481	0	2.04622	22.2963	1.85701	3.59438	9.42019e-05	0.000274995
TRNAG-UCC	25.5155	17.0062	17.6473	0	1.11952	1.02311	20.0563	0.714211	4.77349	9.48597e-05	0.000276818
LOC105609549	12.2474	13.7669	10.0842	0	0	0	12.0328	0	5.88885	9.54637e-05	0.000278482
LOC105602159	26.5361	15.3866	12.6052	0	0	1.02311	18.1759	0.341037	5.51713	9.85018e-05	0.000286807
LOC101102990	32.6598	207.314	115.968	3803.27	186.96	8556.29	118.647	4182.17	-5.13902	0.000106709	0.000308933
LOC105615805	15.3093	8.09818	13.4455	0	0	0	12.2843	0	5.91564	0.000108676	0.000314301
LOC105616426	21.433	18.6258	17.6473	1.17494	0	2.04622	19.2354	1.07372	4.13266	0.000110335	0.000318727
LOC101106553	24.4948	29.9633	22.6893	0	4.47808	4.09245	25.7158	2.85684	3.14678	0.000114025	0.000328701
LOC105610928	10.2062	12.1473	12.6052	0	0	0	11.6529	0	5.84388	0.00011465	0.000330387
LOC105616582	13.268	22.6749	5.88242	0	0	0	13.9418	0	6.10236	0.000116041	0.000333931
LOC105605039	18.3711	21.0553	11.7648	1.17494	0	0	17.0638	0.391646	5.43054	0.000116218	0.000334326
-	90.835	42.9204	78.1522	5.87469	0	16.3698	70.6359	7.41483	3.23658	0.000117921	0.000338911
-	0	9.71782	2.52104	31.7233	125.386	26.6009	4.07962	61.2368	-3.87733	0.000121273	0.000347982
LOC101111397	2.04124	0.809818	2.52104	23.4988	44.7808	8.1849	1.7907	25.4881	-3.84091	0.000122132	0.000350245
LOC101112335	35.7216	27.5338	43.698	8.22457	0	1.02311	35.6512	3.08256	3.56319	0.000123632	0.00035426
LOC105603991	15.3093	12.1473	8.40346	0	0	0	11.9533	0	5.87646	0.000123897	0.000354937
-	0	0	0.840346	10.5744	15.6733	17.3929	0.280115	14.5469	-5.52091	0.000125294	0.000358651
LOC106991908	0	2.42946	2.52104	27.0236	88.4421	5.11556	1.65016	40.1937	-4.56372	0.000125498	0.000359194
LOC105607433	26.5361	21.0553	32.7735	3.52481	0	5.11556	26.7883	2.88012	3.20123	0.000129145	0.000368783
-	17.3505	8.908	10.0842	0	0	0	12.1142	0	5.89393	0.000129668	0.000370065
RNF224	25.5155	18.6258	15.1262	2.34988	0	1.02311	19.7558	1.12433	4.15343	0.00012983	0.000370485
LOC105607012	12.2474	22.6749	5.88242	0	0	0	13.6016	0	6.06715	0.00013772	0.000391519
-	2.04124	2.42946	2.52104	9.3995	99.6373	12.2773	2.33058	40.438	-4.11185	0.000137928	0.000392021
NTS	206.165	63.9757	29.4121	634.466	1671.44	690.601	99.8509	998.837	-3.32416	0.000138454	0.000393248
LOC106991759	45.9278	19.4356	24.37	4.69975	0	4.09245	29.9112	2.93073	3.34521	0.000140118	0.00039742
LOC105607438	16.3299	8.908	10.0842	0	0	0	11.774	0	5.85321	0.000145573	0.000411495
GLDN	222.495	61.5462	69.7487	1.17494	25.749	13.3005	117.93	13.4081	3.13185	0.000146763	0.000414578
-	34.701	12.1473	10.9245	1.17494	0	0	19.2576	0.391646	5.59886	0.000148078	0.000417817
LOC101111440	0	0	0	14.0993	12.3147	6.13867	0	10.8509	-6.05475	0.000148347	0.000418528
LOC106991351	11.2268	20.2455	17.6473	0	0	1.02311	16.3732	0.341037	5.37525	0.000148577	0.00041913
-	12.2474	9.71782	11.7648	0	0	0	11.2434	0	5.78967	0.000148935	0.000419948
LOC105604756	18.3711	17.0062	19.328	1.17494	1.11952	0	18.2351	0.764819	4.62275	0.000151541	0.000426837
LOC105602979	11.2268	136.049	2.52104	1.17494	1.11952	1.02311	49.9324	1.10586	5.50086	0.000152041	0.000428063
KLC3	0	0	0	18.799	5.5976	10.2311	0	11.5426	-6.14483	0.00015284	0.000429986
ZG16	37.7629	3.23927	35.2945	0	0	1.02311	25.4322	0.341037	6.00406	0.000154368	0.00043409
-	5.10309	5.66873	0.840346	24.6737	52.6174	19.4391	3.87072	32.2434	-3.06614	0.000155998	0.000438227
DPY19L2	2.04124	1.61964	4.20173	30.5484	21.2709	14.3236	2.62087	22.0476	-3.0614	0.000160187	0.000449163
LOC105606136	268.423	220.271	203.364	4.69975	0	21.4854	230.686	8.72837	4.71631	0.000162178	0.000454357
B4GALNT3	2.04124	0.809818	1.68069	22.3238	7.83664	32.7396	1.51058	20.9667	-3.82167	0.000163032	0.000456494
-	28.5773	21.8651	22.6893	4.69975	0	0	24.3773	1.56658	4.01534	0.000181519	0.000504908
LOC105608624	13.268	21.8651	12.6052	0	0	1.02311	15.9128	0.341037	5.33272	0.000182218	0.000506681
-	12.2474	25.1044	20.1683	1.17494	2.23904	1.02311	19.1734	1.47903	3.70781	0.000182413	0.000507166
LOC105607898	15.3093	12.1473	18.4876	1.17494	0	0	15.3147	0.391646	5.2745	0.000195003	0.00053988
LOC105603974	26.5361	20.2455	15.1262	3.52481	0	1.02311	20.6359	1.51598	3.79427	0.000199308	0.000550757
PLXNA1	119.412	138.479	104.203	7.04963	1.11952	35.8089	120.698	14.6594	3.03088	0.000200182	0.000552988
LOC105604742	14.2887	13.7669	16.8069	0	1.11952	0	14.9542	0.373173	5.24093	0.000203591	0.00056172
-	46.9484	21.0553	28.5718	5.87469	0	5.11556	32.1918	3.66342	3.13031	0.000205459	0.000566434
FAM81B	2.04124	0.809818	1.68069	17.6241	54.8565	6.13867	1.51058	26.2064	-4.13605	0.000206413	0.000568811
-	0	0	0	4.69975	35.8246	5.11556	0	15.2133	-6.54456	0.000208631	0.000574478
LOC105602735	20.4124	12.9571	12.6052	0	0	1.02311	15.3249	0.341037	5.27179	0.000215943	0.000593824
LOC105616123	3.06186	64.7855	4.20173	0	0	0	24.0164	0	6.88855	0.000216085	0.000594151
CRISP3	24.4948	17.0062	15.1262	1.17494	2.23904	2.04622	18.8758	1.82007	3.36062	0.000216766	0.000595892
LOC105616505	13.268	37.2516	30.2525	1.17494	5.5976	1.02311	26.924	2.59855	3.38486	0.000217979	0.000599028
-	0	1.61964	0	12.9243	29.1075	12.2773	0.539879	18.1031	-4.97357	0.000218068	0.000599206
LOC106990905	18.3711	19.4356	15.1262	1.17494	0	2.04622	17.6443	1.07372	4.00993	0.000224242	0.000614571
-	18.3711	14.5767	37.8156	3.52481	0	2.04622	23.5878	1.85701	3.67807	0.000225851	0.000618543
LOC106991788	52.0515	46.1597	61.3453	3.52481	0	14.3236	53.1855	5.94946	3.13926	0.000227391	0.000622556
-	6.12371	20.2455	10.0842	0	0	0	12.1511	0	5.90771	0.000231065	0.000632058
-	12.2474	8.09818	11.7648	0	0	0	10.7035	0	5.71796	0.00023163	0.000633464
IL20RA	46.9484	84.2211	67.2277	0	6.71712	17.3929	66.1324	8.03667	3.02365	0.000231925	0.000634202
-	17.3505	15.3866	11.7648	1.17494	0	0	14.834	0.391646	5.22695	0.000232076	0.000634544
LOC105603275	17.3505	63.9757	18.4876	0	2.23904	5.11556	33.2713	2.45153	3.73334	0.000232802	0.000636391
-	25.5155	17.0062	60.5049	2.34988	0	6.13867	34.3422	2.82952	3.57817	0.000237188	0.000647527
LOC106991192	1.02062	0	0	66.9715	3.35856	7.16178	0.340206	25.8306	-6.34464	0.000237557	0.000648462
LOC105614981	18.3711	28.3436	15.1262	0	0	3.06934	20.6137	1.02311	4.25881	0.000249313	0.000678694
LOC106991649	8.16495	25.1044	15.9666	0	0	1.02311	16.412	0.341037	5.38006	0.000251392	0.000683979
LOC105616381	8.16495	17.0062	8.40346	0	0	0	11.1915	0	5.78748	0.000251469	0.00068404
LOC106991016	7.14433	14.5767	10.9245	0	0	0	10.8819	0	5.74758	0.000254391	0.000691685
LOC105615619	11.2268	9.71782	10.0842	0	0	0	10.3429	0	5.66941	0.000255494	0.000694379
LOC105604851	86.7526	2.42946	99.1608	0	0	5.11556	62.781	1.70519	5.16277	0.000260942	0.000708252
LOC105602659	20.4124	14.5767	15.9666	1.17494	0	1.02311	16.9852	0.732683	4.52883	0.000261918	0.000710597
-	3.06186	0.809818	0	9.3995	30.227	21.4854	1.29056	20.3706	-4.063	0.000265514	0.000719712
LOC105605077	16.3299	26.724	14.2859	2.34988	0	0	19.1133	0.783292	4.68215	0.000266055	0.000721038
LOC105612048	21.433	29.9633	11.7648	1.17494	0	3.06934	21.0537	1.41476	3.86055	0.000267843	0.000725487
WISP3	13.268	41.3007	31.0928	1.17494	2.23904	6.13867	28.5539	3.18422	3.14281	0.000279226	0.00075435
LOC105616516	17.3505	20.2455	19.328	0	0	3.06934	18.9746	1.02311	4.13678	0.00028549	0.000770269
BSX	1.02062	0	0	15.2742	5.5976	23.5316	0.340206	14.8011	-5.54628	0.000287469	0.000775189
LOC105613169	25.5155	32.3927	24.37	1.17494	6.71712	0	27.4261	2.63069	3.39839	0.000295129	0.000794295
LOC105609005	9.18557	15.3866	7.56311	0	0	0	10.7117	0	5.72306	0.000295919	0.000796118
LOC105602277	8.16495	20.2455	6.72277	0	0	0	11.7111	0	5.85306	0.000297769	0.00080071
LOC105601882	17.3505	17.0062	24.37	0	3.35856	2.04622	19.5756	1.80159	3.42404	0.000298111	0.000801454
LOC105604031	18.3711	27.5338	14.2859	3.52481	0	1.02311	20.0636	1.51598	3.75745	0.00029862	0.00080265
LOC105608773	21.433	32.3927	7.56311	1.17494	1.11952	0	20.4629	0.764819	4.78483	0.000301648	0.000809827
LOC101122560	14.2887	7.28837	10.0842	0	0	0	10.5537	0	5.69555	0.000303121	0.00081308
LOC105602202	11.2268	12.1473	7.56311	0	0	0	10.3124	0	5.66559	0.000305627	0.000819538
LOC105602171	18.3711	27.5338	18.4876	2.34988	0	4.09245	21.4642	2.14744	3.30094	0.000314228	0.000841062
LOC105615937	21.433	14.5767	14.2859	1.17494	1.11952	0	16.7652	0.764819	4.49664	0.000314307	0.000841182
LOC101110567	2.04124	0.809818	2.52104	56.397	15.6733	7.16178	1.7907	26.4107	-3.88922	0.000315442	0.000844129
-	1.02062	1.61964	1.68069	12.9243	42.5418	8.1849	1.44032	21.217	-3.86321	0.000319517	0.000854298
LOC106991617	37.7629	20.2455	23.5297	1.17494	0	6.13867	27.1793	2.43787	3.43659	0.000325082	0.00086806
LOC105604272	18.3711	15.3866	20.1683	2.34988	2.23904	0	17.9753	1.52964	3.59366	0.000326581	0.000871687
LOC105609586	13.268	11.3375	6.72277	0	0	0	10.4428	0	5.68181	0.000328365	0.000875656
LOC105610786	13.268	11.3375	6.72277	0	0	0	10.4428	0	5.68181	0.000328365	0.000875656
-	130.639	85.0309	51.2611	0	6.71712	22.5085	88.9771	9.74186	3.17586	0.000334846	0.000891645
MS4A2	57.1546	31.5829	7.56311	2.34988	4.47808	2.04622	32.1002	2.95806	3.43936	0.000339499	0.000903841
TRNAS-GGA	17.3505	44.54	15.9666	0	0	4.09245	25.9524	1.36415	4.19066	0.000340037	0.000905176
LOC105613234	1.02062	0.809818	0	15.2742	27.988	7.16178	0.610146	16.808	-4.8229	0.000340681	0.000906795
LOC106991127	9.18557	17.816	15.9666	0	0	1.02311	14.3227	0.341037	5.18271	0.000347032	0.000922515
LOC101113627	2.04124	74.5033	2.52104	0	0	0	26.3552	0	7.02211	0.000351351	0.000933299
TUB	1166.57	1491.69	1413.46	103.395	40.3027	360.135	1357.24	167.944	3.01391	0.000364169	0.000964466
LOC106991142	17.3505	21.8651	12.6052	1.17494	2.23904	0	17.2736	1.13799	3.95742	0.00036926	0.000976912
LRRD1	16.3299	17.816	24.37	3.52481	0	0	19.5053	1.17494	4.11711	0.000377669	0.000997355
-	10.2062	28.3436	18.4876	0	0	2.04622	19.0125	0.682075	4.72381	0.000378163	0.000998342
LOC101122652	10.2062	9.71782	9.24381	0	0	0	9.7226	0	5.58068	0.000380728	0.00100501
LOC105613285	11.2268	8.09818	10.0842	0	0	0	9.80305	0	5.59125	0.000386521	0.00101879
LOC105616121	11.2268	17.0062	5.04208	0	0	0	11.0917	0	5.77193	0.000390534	0.00102915
AZGP1	0	0.809818	0.840346	10.5744	16.7928	14.3236	0.550055	13.8969	-4.58351	0.00039096	0.00103012
LOC105602671	12.2474	17.816	17.6473	1.17494	0	1.02311	15.9036	0.732683	4.44021	0.000403904	0.00106258
-	18.3711	18.6258	14.2859	2.34988	1.11952	2.04622	17.0943	1.83854	3.21694	0.000406736	0.00106924
LOC105615614	13.268	13.7669	12.6052	0	0	1.02311	13.2134	0.341037	5.06205	0.000411961	0.00108195
LOC101109268	0	0	0.840346	35.2481	2.23904	17.3929	0.280115	18.2934	-5.84795	0.000416615	0.00109313
LOC106991534	17.3505	18.6258	19.328	0	3.35856	0	18.4348	1.11952	4.05673	0.000422735	0.00110849
LOC101112919	32.6598	20.2455	22.6893	0	2.23904	6.13867	25.1982	2.79257	3.13245	0.000425318	0.00111503
FANCB	20.4124	17.0062	21.0087	1.17494	0	4.09245	19.4757	1.7558	3.42991	0.000443682	0.00115914
LOC105604774	8.16495	11.3375	9.24381	0	0	0	9.58207	0	5.56209	0.000446831	0.00116663
LOC106991581	15.3093	14.5767	10.0842	0	0	1.02311	13.3234	0.341037	5.07238	0.000446967	0.00116687
LOC105603708	8.16495	8.908	11.7648	0	0	0	9.6126	0	5.56623	0.000449154	0.00117221
GSC	1.02062	1.61964	1.68069	8.22457	77.2469	5.11556	1.44032	30.1957	-4.37639	0.000457773	0.00119295
CCM2L	14.2887	20.2455	15.1262	0	0	2.04622	16.5534	0.682075	4.51819	0.000459829	0.00119781
LOC105603273	2.04124	0.809818	1.68069	24.6737	17.9123	8.1849	1.51058	16.9236	-3.50602	0.000461493	0.00120151
SLC17A8	977.752	121.473	62.1856	23.4988	15.6733	33.7627	387.137	24.3116	3.9919	0.000461839	0.00120229
GPX2	1.02062	1.61964	0	18.799	16.7928	9.20801	0.880085	14.9333	-4.08101	0.000462241	0.00120321
-	23.4742	12.1473	16.8069	2.34988	0	0	17.4761	0.783292	4.54608	0.000462869	0.00120472
-	11.2268	8.908	8.40346	0	0	0	9.51276	0	5.54772	0.000464575	0.00120878
LOC105604204	18.3711	25.1044	29.4121	0	0	5.11556	24.2959	1.70519	3.77512	0.00046475	0.00120898
-	24.4948	19.4356	21.849	2.34988	0	5.11556	21.9265	2.48848	3.11137	0.000468547	0.00121798
-	323.536	330.406	321.853	18.799	0	28.6471	325.265	15.8154	4.36042	0.000483357	0.00125359
LOC105605056	10.2062	48.5891	4.20173	0	0	1.02311	20.999	0.341037	5.73344	0.000492378	0.00127565
LOC105605857	20.4124	23.4847	9.24381	0	2.23904	1.02311	17.7136	1.08738	4.0108	0.000496908	0.00128618
PKD2L1	19.3918	23.4847	8.40346	1.17494	1.11952	0	17.0933	0.764819	4.5253	0.000499146	0.00129158
LOC105603287	3.06186	0	5.04208	19.9739	53.7369	15.3467	2.70131	29.6859	-3.46879	0.000505402	0.00130667
-	31.6392	10.5276	18.4876	2.34988	2.23904	2.04622	20.2181	2.21171	3.1879	0.000508901	0.0013149
LOC105605801	5.10309	13.7669	11.7648	0	0	0	10.2116	0	5.65694	0.000509408	0.00131608
ARSJ	17.3505	14.5767	21.849	2.34988	1.11952	3.06934	17.9254	2.17958	3.0295	0.000511652	0.00132165
-	17.3505	17.816	12.6052	1.17494	0	2.04622	15.9239	1.07372	3.86213	0.000515254	0.00132994
LOC106991395	12.2474	11.3375	5.88242	0	0	0	9.82243	0	5.59384	0.00051618	0.00133177
LOC105603859	183.711	252.663	155.464	1.17494	0	17.3929	197.28	6.18928	4.98358	0.000517677	0.00133508
LOC105602646	8.16495	33.2026	16.8069	1.17494	1.11952	2.04622	19.3915	1.44689	3.73667	0.000524903	0.00135218
-	14.2887	783.094	474.796	11.7494	0	8.1849	424.06	6.64476	5.99663	0.000533649	0.001373
KLK8	8.16495	35.632	7.56311	1.17494	0	0	17.12	0.391646	5.44009	0.000538826	0.00138504
LOC105609328	6.12371	0.809818	2.52104	41.1228	8.95616	36.832	3.15152	28.9703	-3.23998	0.000543024	0.00139467
LOC105612687	10.2062	22.6749	18.4876	0	0	2.04622	17.1229	0.682075	4.57195	0.000543303	0.00139525
LOC101101943	4.08247	3.23927	1.68069	28.1985	36.9442	8.1849	3.00081	24.4425	-3.03686	0.000543643	0.00139569
LOC106990859	8.16495	14.5767	6.72277	0	0	0	9.82148	0	5.59817	0.000543988	0.00139643
LOC101114879	1.02062	3.23927	0.840346	17.6241	29.1075	9.20801	1.70008	18.6465	-3.42391	0.000555203	0.0014239
LOC101112481	6.12371	15.3866	8.40346	0	0	0	9.97124	0	5.62194	0.000560013	0.00143564
-	23.4742	24.2946	16.8069	0	1.11952	5.11556	21.5252	2.07836	3.32357	0.000564511	0.00144598
LOC106991716	14.2887	8.09818	6.72277	0	0	0	9.7032	0	5.57355	0.000574123	0.00146909
-	15.3093	21.8651	20.1683	1.17494	0	4.09245	19.1142	1.7558	3.40678	0.00057775	0.00147746
LHX8	6.12371	2.42946	4.20173	8.22457	153.374	12.2773	4.25163	57.9587	-3.77944	0.000581489	0.00148641
CATHL1B	0	0	0.840346	32.8983	3.35856	11.2542	0.280115	15.837	-5.63865	0.000582506	0.00148855
LOC105616484	21.433	4.85891	7.56311	0	0	0	11.285	0	5.78911	0.00058286	0.00148931
-	0	0.809818	0	4.69975	66.0517	2.04622	0.269939	24.2659	-6.25639	0.000584595	0.00149358
LOC106991170	16.3299	23.4847	25.2104	1.17494	0	5.11556	21.675	2.09683	3.33185	0.000586723	0.00149856
AZU1	0	0	0	8.22457	3.35856	19.4391	0	10.3408	-5.99181	0.000588691	0.00150297
-	10.2062	7.28837	10.0842	0	0	0	9.1929	0	5.49886	0.000592317	0.00151145
LOC106991416	19.3918	20.2455	13.4455	0	0	3.06934	17.6942	1.02311	4.0372	0.000593493	0.00151414
LOC105611599	8.16495	13.7669	6.72277	0	0	0	9.55154	0	5.55772	0.000604882	0.00154162
-	73.4845	23.4847	15.1262	2.34988	1.11952	8.1849	37.3652	3.88476	3.24078	0.000622938	0.00158488
LOC105605750	12.2474	13.7669	10.9245	1.17494	0	0	12.3129	0.391646	4.96051	0.000628241	0.00159739
LOC105603470	8.16495	10.5276	8.40346	0	0	0	9.03202	0	5.47623	0.000635594	0.0016146
LOC105615411	13.268	7.28837	7.56311	0	0	0	9.37317	0	5.52394	0.000642526	0.00163121
LOC105607988	13.268	7.28837	7.56311	0	0	0	9.37317	0	5.52394	0.000642526	0.00163121
LOC105603668	7.14433	6.47855	15.9666	0	0	0	9.86315	0	5.60381	0.000649467	0.00164665
LOC101108075	12.2474	14.5767	16.8069	0	1.11952	1.02311	14.5437	0.714211	4.31689	0.000649821	0.00164738
LOC101118066	9.18557	19.4356	80.6732	4.69975	1.11952	4.09245	36.4315	3.30391	3.46548	0.000662111	0.00167786
LOC105607590	16.3299	8.908	12.6052	0	1.11952	0	12.6144	0.373173	4.99104	0.000666513	0.00168798
LOC105607669	17.3505	9.71782	10.9245	0	0	1.02311	12.6643	0.341037	4.99603	0.000667318	0.00168985
LOC105602467	7.14433	17.0062	15.1262	0	0	1.02311	13.0922	0.341037	5.05398	0.000676966	0.00171323
LOC105613298	18.3711	25.1044	20.1683	2.34988	0	5.11556	21.2146	2.48848	3.0675	0.000683438	0.00172838
LOC101114497	12.2474	11.3375	12.6052	0	0	1.02311	12.0634	0.341037	4.93031	0.000690321	0.00174455
FSHR	18.3711	2.42946	15.1262	0	0	0	11.9756	0	5.87785	0.000692104	0.00174834
-	41.8454	19.4356	7.56311	0	3.35856	1.02311	22.948	1.46056	3.96302	0.000704505	0.00177751
LOC105614185	12.2474	12.9571	10.9245	0	0	1.02311	12.043	0.341037	4.92815	0.00070461	0.00177759
TBATA	3.06186	0	0	11.7494	39.1832	11.2542	1.02062	20.7289	-4.46129	0.000708621	0.0017859
LOC105613113	8.16495	14.5767	5.88242	0	0	0	9.54137	0	5.5562	0.000715289	0.00180088
LOC105602936	9.18557	16.1964	11.7648	0	0	1.02311	12.3823	0.341037	4.97191	0.000715362	0.00180088
LOC105609808	13.268	9.71782	13.4455	0	0	1.02311	12.1438	0.341037	4.93865	0.000716552	0.00180333
LOC105603879	11.2268	15.3866	45.3787	1.17494	3.35856	3.06934	23.9973	2.53428	3.23601	0.000718107	0.00180706
LOC105613059	16.3299	5.66873	7.56311	0	0	0	9.85391	0	5.59427	0.000725127	0.00182325
LOC105616289	12.2474	9.71782	14.2859	0	0	1.02311	12.0837	0.341037	4.93248	0.000743452	0.00186631
LOC101119795	2.04124	2.42946	0.840346	23.4988	14.5538	10.2311	1.77035	16.0945	-3.18457	0.000745691	0.00187175
RBM47	42.866	12.9571	22.6893	2.34988	1.11952	6.13867	26.1708	3.20269	3.00362	0.000757525	0.00189896
SEL1L2	11.2268	17.0062	21.849	2.34988	0	2.04622	16.694	1.46537	3.51157	0.000764301	0.0019146
LOC105611471	15.3093	3.23927	13.4455	0	0	0	10.6647	0	5.71061	0.000767689	0.00192231
GPR101	260.258	709.401	592.444	22.3238	10.0757	114.589	520.701	48.996	3.40776	0.000776006	0.00194157
ENAM	10.2062	16.1964	10.0842	0	0	1.02311	12.1622	0.341037	4.94498	0.000782729	0.00195643
LOC105610844	6.12371	18.6258	5.88242	0	0	0	10.2107	0	5.65606	0.000783856	0.00195885
LOC101108906	12.2474	12.9571	4.20173	0	0	0	9.80208	0	5.59132	0.000784681	0.00196072
LOC105605724	16.3299	21.0553	5.04208	0	1.11952	0	14.1424	0.373173	5.15945	0.000788332	0.00196866
C13H10orf113	8.16495	17.0062	21.0087	1.17494	1.11952	0	15.3933	0.764819	4.37998	0.000789394	0.00197091
LOC105616425	15.3093	12.9571	8.40346	0	0	1.02311	12.2233	0.341037	4.94681	0.000791004	0.00197473
LOC105612471	7.14433	7.28837	12.6052	0	0	0	9.01263	0	5.47353	0.000793056	0.00197906
HSPB3	1.02062	1.61964	0.840346	50.5223	3.35856	12.2773	1.1602	22.0527	-4.2362	0.000803262	0.00200212
C13H20orf144	21.433	25.9142	48.7401	1.17494	0	8.1849	32.0291	3.11994	3.32807	0.000808564	0.00201393
TSPAN16	1.02062	0	2.52104	17.6241	8.95616	20.4622	1.18055	15.6808	-3.73606	0.000819356	0.00203755
LOC105612530	23.4742	17.0062	4.20173	0	1.11952	0	14.894	0.373173	5.23069	0.000819574	0.0020378
LOC101116714	11.2268	13.7669	4.20173	0	0	0	9.73182	0	5.58189	0.00082522	0.00205069
LOC105613155	15.3093	8.908	11.7648	0	1.11952	0	11.994	0.373173	4.91848	0.000838641	0.00208155
-	16.3299	25.9142	20.1683	4.69975	0	0	20.8041	1.56658	3.78554	0.000838862	0.00208189
LOC101108071	0	0	0	7.04963	3.35856	18.416	0	9.60807	-5.88614	0.000862465	0.00213515
LOC101110185	1.02062	1.61964	2.52104	18.799	17.9123	9.20801	1.72043	15.3064	-3.1279	0.000877908	0.00217122
LOC106990879	28.5773	17.816	12.6052	1.17494	0	4.09245	19.6662	1.7558	3.44378	0.000880229	0.00217588
-	18.3711	6.47855	13.4455	0	0	1.02311	12.7651	0.341037	5.00693	0.000895408	0.00221055
-	1.02062	0	1.68069	17.6241	17.9123	7.16178	0.900437	14.2327	-3.99919	0.00089716	0.00221422
CACNG6	3.06186	0	0.840346	19.9739	19.0318	9.20801	1.30073	16.0713	-3.71095	0.000920515	0.00226781
-	19.3918	12.1473	13.4455	2.34988	0	1.02311	14.9949	1.12433	3.75399	0.000921396	0.00226976
-	1.02062	1.61964	2.52104	15.2742	19.0318	10.2311	1.72043	14.8457	-3.08483	0.000927	0.00228266
-	1.02062	3.23927	0	15.2742	8.95616	33.7627	1.41996	19.331	-3.74543	0.000945417	0.00232502
-	11.2268	9.71782	13.4455	0	1.11952	0	11.4634	0.373173	4.85696	0.000958542	0.00235474
LOC105615110	15.3093	3.23927	11.7648	0	0	0	10.1045	0	5.63207	0.000978317	0.00239835
LOC105605589	20.4124	20.2455	12.6052	3.52481	2.23904	0	17.7543	1.92128	3.24533	0.000992877	0.00243212
RASEF	5.10309	11.3375	10.0842	0	0	0	8.84157	0	5.44863	0.000993385	0.00243289
LOC105605882	7.14433	12.1473	6.72277	0	0	0	8.67146	0	5.41856	0.000998679	0.00244441
LOC105612439	8.16495	12.1473	5.88242	0	0	0	8.73155	0	5.42739	0.00100175	0.00245121
LOC106991169	26.5361	45.3498	47.0594	0	1.11952	11.2542	39.6484	4.12458	3.23531	0.00100314	0.00245436
C7H14orf39	1.02062	0	0	9.3995	10.0757	10.2311	0.340206	9.9021	-4.96431	0.00101196	0.00247473
LOC106991565	25.5155	17.0062	0.840346	0	0	0	14.454	0	6.15043	0.00101914	0.00249107
-	19.3918	12.1473	13.4455	2.34988	0	0	14.9949	0.783292	4.32447	0.00102114	0.00249521
GABRR2	12.2474	27.5338	71.4294	3.52481	0	7.16178	37.0702	3.5622	3.36698	0.0010231	0.00249928
LOC106991543	11.2268	26.724	14.2859	1.17494	0	3.06934	17.4122	1.41476	3.59185	0.0010244	0.00250219
LOC101117810	78.5876	2.42946	2.52104	0	0	1.02311	27.846	0.341037	6.13343	0.00102502	0.00250304
LOC101114311	0	2.42946	2.52104	10.5744	13.4342	28.6471	1.65016	17.5519	-3.36278	0.00102563	0.00250422
LOC101122381	3.06186	9.71782	18.4876	0	0	0	10.4224	0	5.68622	0.00103178	0.00251825
-	2.04124	0.809818	0	12.9243	24.6294	7.16178	0.950352	14.9052	-4.0394	0.00103491	0.0025254
TCF21	0	0.809818	0	28.1985	3.35856	9.20801	0.269939	13.5884	-5.41728	0.00104841	0.00255583
LOC105603353	23.4742	8.908	15.9666	2.34988	0	0	16.1163	0.783292	4.42485	0.00105042	0.00256048
LOC105611247	9.18557	8.09818	7.56311	0	0	0	8.28229	0	5.3487	0.00105184	0.00256343
LOC106991667	14.2887	9.71782	10.0842	0	0	1.02311	11.3635	0.341037	4.84093	0.00105807	0.0025768
LOC106990849	13.268	8.908	11.7648	1.17494	0	0	11.3136	0.391646	4.83546	0.00105996	0.00258071
-	21.433	10.5276	13.4455	0	0	2.04622	15.1354	0.682075	4.38594	0.00106123	0.00258354
-	0	0	0.840346	8.22457	19.0318	6.13867	0.280115	11.1317	-5.13122	0.00106915	0.00260079
-	8.16495	8.09818	8.40346	0	0	0	8.2222	0	5.33944	0.0010751	0.00261258
LOC106990353	35.7216	24.2946	25.2104	1.17494	0	8.1849	28.4089	3.11994	3.15015	0.00107531	0.0026127
LOC105614889	17.3505	13.7669	18.4876	2.34988	0	3.06934	16.535	1.8064	3.17851	0.00108859	0.00264215
LOC105602138	27.5567	16.1964	21.0087	5.87469	0	1.02311	21.5872	2.29927	3.25994	0.00110206	0.00267276
-	14.2887	12.9571	15.1262	0	0	2.04622	14.124	0.682075	4.28865	0.00110232	0.00267312
LOC101121216	6.12371	0	4.20173	101.045	8.95616	263.963	3.44181	124.655	-5.1912	0.00110948	0.00268944
LOC101111382	17.3505	12.1473	13.4455	0	0	2.04622	14.3144	0.682075	4.30603	0.00111084	0.00269248
-	14.2887	12.9571	18.4876	2.34988	0	2.04622	15.2445	1.46537	3.37708	0.00111382	0.00269864
LOC105615127	30.6186	12.1473	6.72277	1.17494	0	1.02311	16.4962	0.732683	4.48279	0.00112117	0.0027154
LOC105610181	12.2474	17.0062	13.4455	0	0	2.04622	14.233	0.682075	4.30254	0.00112339	0.00272051
MEPE	0	0	0	7.04963	11.1952	5.11556	0	7.7868	-5.57751	0.00112481	0.00272314
LOC105616443	15.3093	19.4356	13.4455	3.52481	0	1.02311	16.0635	1.51598	3.43561	0.00114259	0.00276298
LOC106991911	6.12371	8.09818	10.9245	0	0	0	8.38213	0	5.36983	0.00114308	0.00276389
LOC105605416	10.2062	10.5276	5.04208	0	0	0	8.59197	0	5.40143	0.00115278	0.00278544
GJA9	27.5567	7.28837	12.6052	1.17494	1.11952	1.02311	15.8168	1.10586	3.83281	0.00116886	0.00282156
LOC101113751	0	0.809818	0	16.4491	8.95616	6.13867	0.269939	10.5147	-5.04638	0.00118816	0.00286538
-	6.12371	64.7855	107.564	9.3995	0	5.11556	59.4912	4.83835	3.62627	0.00119489	0.00288021
LOC105606111	21.433	20.2455	23.5297	1.17494	0	6.13867	21.736	2.43787	3.11742	0.001198	0.00288686
LOC106991763	7.14433	7.28837	10.0842	0	0	0	8.17228	0	5.33172	0.00120979	0.00291189
-	6.12371	11.3375	7.56311	0	0	0	8.34143	0	5.36342	0.00121687	0.0029281
LOC101104669	10.2062	11.3375	10.9245	0	0	1.02311	10.8227	0.341037	4.77491	0.00123535	0.00296968
ITGB6	0	1.61964	1.68069	50.5223	3.35856	12.2773	1.10011	22.0527	-4.27448	0.00124046	0.00298139
-	20.4124	37.2516	15.9666	0	5.5976	0	24.5435	1.86587	3.72836	0.00124947	0.00300101
WDR72	1.02062	25.1044	89.917	1.17494	3.35856	0	38.6807	1.51117	4.69448	0.00126337	0.00303235
LOC106991060	13.268	17.816	9.24381	1.17494	0	1.02311	13.4426	0.732683	4.19547	0.00126829	0.0030428
-	8.16495	21.0553	7.56311	0	0	1.02311	12.2611	0.341037	4.9584	0.00127204	0.00305141
ERICH6B	1.02062	0.809818	0.840346	19.9739	29.1075	2.04622	0.890261	17.0426	-4.2642	0.00129491	0.00310358
-	0	3.23927	0	24.6737	11.1952	15.3467	1.07976	17.0719	-3.91266	0.00131691	0.00314992
LOC105616887	13.268	5.66873	6.72277	0	0	0	8.55318	0	5.39064	0.00132086	0.00315876
LOC105610070	18.3711	65.5953	12.6052	5.87469	0	0	32.1905	1.95823	4.07744	0.00132231	0.00316164
-	1.02062	0	0	24.6737	4.47808	7.16178	0.340206	12.1045	-5.24967	0.00132977	0.00317825
LOC106991937	10.2062	9.71782	5.04208	0	0	0	8.32203	0	5.35488	0.00133852	0.00319733
LOC105611933	11.2268	17.0062	13.4455	0	0	2.04622	13.8928	0.682075	4.26902	0.00134177	0.00320355
NMUR2	1.02062	4.04909	0	10.5744	14.5538	36.832	1.6899	20.6534	-3.58716	0.00135484	0.00323227
LOC101107948	14.2887	12.9571	10.9245	0	1.11952	1.02311	12.7234	0.714211	4.12074	0.00137981	0.00328587
LOC105615592	8.16495	8.908	6.72277	0	0	0	7.93191	0	5.28745	0.00138437	0.0032956
LOC105608642	21.433	16.1964	3.36138	1.17494	0	0	13.6636	0.391646	5.10645	0.00139359	0.00331581
LOC105615893	8.16495	38.0615	9.24381	1.17494	0	2.04622	18.4901	1.07372	4.08844	0.00140272	0.00333499
-	12.2474	13.7669	11.7648	0	1.11952	1.02311	12.5931	0.714211	4.10817	0.00141489	0.00336199
LOC106991638	5.10309	20.2455	26.0507	0	0	2.04622	17.1331	0.682075	4.58144	0.00142799	0.00339119
-	5.10309	19.4356	27.7314	1.17494	1.11952	2.04622	17.4234	1.44689	3.58305	0.00144873	0.00343487
BTNL9	14.2887	13.7669	10.0842	1.17494	0	1.02311	12.7132	0.732683	4.11255	0.00146082	0.00346122
-	1.02062	21.8651	14.2859	0	0	0	12.3905	0	5.93574	0.00146099	0.00346131
LOC106991130	14.2887	5.66873	5.88242	0	0	0	8.61327	0	5.40004	0.00146897	0.0034792
LOC105603621	14.2887	25.9142	13.4455	0	1.11952	4.09245	17.8828	1.73732	3.31983	0.00148282	0.00350834
-	17.3505	8.908	15.9666	0	1.11952	2.04622	14.075	1.05525	3.68975	0.00150902	0.00356797
LOC105602265	32.6598	11.3375	16.8069	0	0	4.09245	20.2681	1.36415	3.82976	0.00151161	0.00357376
LOC105604690	7.14433	9.71782	6.72277	0	0	0	7.86164	0	5.27607	0.00151589	0.00358318
LOC101117796	12.2474	33.2026	15.1262	4.69975	0	1.02311	20.1921	1.90762	3.43643	0.00152338	0.00359965
LOC105608095	19.3918	15.3866	8.40346	0	0	2.04622	14.3939	0.682075	4.31654	0.00153296	0.00362078
LOC105602239	4.08247	17.0062	15.9666	1.17494	0	0	12.3517	0.391646	4.97099	0.00153384	0.00362252
LOC105608196	1.02062	1.61964	2.52104	22.3238	12.3147	9.20801	1.72043	14.6155	-3.06123	0.00155274	0.00366471
LOC106990845	23.4742	12.9571	8.40346	0	0	2.04622	14.9449	0.682075	4.37005	0.00155291	0.00366478
IRX4	7.14433	12.9571	21.849	1.17494	1.11952	0	13.9835	0.764819	4.23966	0.0015553	0.00366903
LOC101112101	11.2268	9.71782	4.20173	0	0	0	8.38212	0	5.36434	0.00156267	0.003685
LOC105601931	12.2474	12.1473	12.6052	0	1.11952	1.02311	12.3333	0.714211	4.07759	0.00156369	0.00368637
HSPA6	44.9072	42.1106	116.808	314.883	139.94	1245.13	67.942	566.65	-3.05975	0.00156895	0.00369806
LOC106991079	10.2062	4.85891	9.24381	0	0	0	8.10297	0	5.31512	0.00157369	0.00370773
PROK1	6.12371	0.809818	1.68069	39.9479	4.47808	43.9938	2.87141	29.4733	-3.39982	0.0015767	0.00371421
NUP210L	11.2268	8.908	10.9245	1.17494	0	0	10.3531	0.391646	4.70867	0.00158913	0.00374033
LOC101122743	8.16495	8.908	15.1262	0	0	1.02311	10.7331	0.341037	4.7645	0.00161592	0.00379727
LOC105616279	8.16495	12.1473	10.9245	0	0	1.02311	10.4122	0.341037	4.72133	0.00162183	0.00381044
LOC101110239	19.3918	11.3375	5.04208	0	0	1.02311	11.9238	0.341037	4.90799	0.00163055	0.00382877
LOC105604867	7.14433	13.7669	10.9245	0	0	1.02311	10.6119	0.341037	4.75013	0.00166238	0.00389983
LOC105606007	7.14433	105.276	0.840346	1.17494	0	2.04622	37.7537	1.07372	5.12225	0.00166977	0.00391606
GBX1	0	0	2.52104	2.34988	81.7249	7.16178	0.840346	30.4122	-5.14518	0.00167396	0.00392393
-	0	0.809818	0	22.3238	1.11952	18.416	0.269939	13.9531	-5.45861	0.00167461	0.00392483
UPK2	0	0	0.840346	10.5744	11.1952	6.13867	0.280115	9.30277	-4.87118	0.0017055	0.00399082
-	10.2062	5.66873	7.56311	0	0	0	7.81268	0	5.26209	0.00171607	0.00401292
LOC105609367	0	0	0	4.69975	19.0318	3.06934	0	8.93364	-5.77586	0.00172958	0.00404148
TYR	0	0	0	9.3995	5.5976	6.13867	0	7.04526	-5.43291	0.00173152	0.00404526
LOC105613448	0	0.809818	2.52104	11.7494	62.6931	2.04622	1.11029	25.4962	-4.48315	0.00175294	0.00409146
LOC105612707	52.0515	15.3866	13.4455	3.52481	0	5.11556	26.9612	2.88012	3.20972	0.00176901	0.00412622
-	421.515	310.16	195.801	12818.6	72.7688	8140.9	309.159	7010.75	-4.50321	0.00177424	0.00413691
LOC106991128	8.16495	8.908	5.88242	0	0	0	7.65179	0	5.23527	0.00178502	0.00416047
LOC101111769	38.7835	4.85891	17.6473	2.34988	0	2.04622	20.4299	1.46537	3.79352	0.00182707	0.00425332
STC2	7.14433	12.9571	10.9245	0	0	1.02311	10.342	0.341037	4.71273	0.00183177	0.00426306
-	7.14433	22.6749	22.6893	1.17494	3.35856	0	17.5029	1.51117	3.5614	0.00183348	0.00426663
-	0	0.809818	2.52104	23.4988	10.0757	9.20801	1.11029	14.2608	-3.62913	0.0018342	0.00426779
ALX3	0	1.61964	1.68069	17.6241	8.95616	11.2542	1.10011	12.6115	-3.45516	0.00190439	0.00442091
LOC105604874	15.3093	6.47855	10.0842	1.17494	0	0	10.624	0.391646	4.74162	0.00190735	0.00442695
-	0	0	0	15.2742	33.5856	0	0	16.2866	-6.64237	0.00191632	0.00444362
LOC105603416	0	0	0	10.5744	8.95616	3.06934	0	7.53331	-5.52749	0.00192836	0.00446863
RBP3	10.2062	11.3375	8.40346	0	1.11952	0	9.98237	0.373173	4.65748	0.00193772	0.004488
LOC101102862	12.2474	5.66873	5.88242	0	0	0	7.93286	0	5.28209	0.00193985	0.00449233
LOC105608541	0	0.809818	0.840346	8.22457	14.5538	9.20801	0.550055	10.6621	-4.20372	0.00194121	0.00449507
-	1.02062	38.8713	4.20173	0	0	0	14.6979	0	6.18113	0.00194154	0.0044954
C6H4orf17	9.18557	14.5767	12.6052	1.17494	0	1.02311	12.1225	0.732683	4.04926	0.00194211	0.0044963
-	0	0	0	10.5744	3.35856	8.1849	0	7.37263	-5.49949	0.00195918	0.00453414
LOC105611514	0	0.809818	0.840346	15.2742	21.2709	3.06934	0.550055	13.2048	-4.5149	0.00196411	0.00454429
LOC101103974	6.12371	9.71782	6.72277	0	0	0	7.52143	0	5.21329	0.00201718	0.00465713
LOC105614911	14.2887	13.7669	1.68069	0	0	0	9.91209	0	5.60677	0.00205315	0.00473315
SLC22A7	7.14433	7.28837	7.56311	0	0	0	7.33194	0	5.17433	0.00207628	0.00478159
LOC106991765	7.14433	12.9571	10.0842	0	1.11952	0	10.0619	0.373173	4.673	0.00208028	0.00478964
LOC101117324	13.268	9.71782	12.6052	1.17494	0	1.02311	11.8637	0.732683	4.0122	0.00208132	0.00479142
LOC106991955	4.08247	15.3866	5.88242	0	0	0	8.45048	0	5.38413	0.00217509	0.00499343
-	7.14433	6.47855	0	39.9479	64.9321	11.2542	4.54096	38.7114	-3.10176	0.00218709	0.00501913
LOC105614693	13.268	15.3866	10.0842	2.34988	0	1.02311	12.9129	1.12433	3.54198	0.00223352	0.00511533
HDC	0	3.23927	52.1015	2633.04	106.354	979.118	18.4469	1239.5	-6.06881	0.00225035	0.00515195
-	12.2474	15.3866	10.9245	1.17494	2.23904	0	12.8528	1.13799	3.52995	0.00225395	0.00515925
LOC105611548	10.2062	16.1964	11.7648	0	0	2.04622	12.7225	0.682075	4.14401	0.00225929	0.00516957
LOC105613961	9.18557	4.85891	8.40346	0	0	0	7.48265	0	5.20053	0.00226342	0.00517856
LOC105606776	9.18557	8.09818	5.04208	0	0	0	7.44194	0	5.19334	0.00226462	0.00518082
LOC106991950	18.3711	7.28837	6.72277	0	0	1.02311	10.7941	0.341037	4.76262	0.0022836	0.00522088
LOC106991574	8.16495	4.85891	9.24381	0	0	0	7.42256	0	5.19018	0.00235576	0.00537452
CDK15	9.18557	14.5767	15.1262	2.34988	0	0	12.9628	0.783292	4.11872	0.00236484	0.00539374
LOC106990271	8.16495	10.5276	17.6473	1.17494	0	1.02311	12.1133	0.732683	4.04824	0.0024098	0.00548824
LOC105608312	22.4536	10.5276	14.2859	0	3.35856	2.04622	15.7557	1.80159	3.10625	0.00251065	0.00570541
LOC105605107	16.3299	4.04909	5.04208	0	0	0	8.47369	0	5.37504	0.0025145	0.00571259
LOC105610837	0	2.42946	0	14.0993	16.7928	8.1849	0.809818	13.0256	-3.92919	0.00253982	0.00576537
LOC106991305	10.2062	4.04909	8.40346	0	0	0	7.55291	0	5.21283	0.00255483	0.00579681
LOC105615742	10.2062	13.7669	5.88242	0	1.11952	0	9.95184	0.373173	4.65351	0.00256224	0.00581255
LOC105612692	15.3093	8.09818	6.72277	0	0	1.02311	10.0434	0.341037	4.65999	0.00256405	0.00581612
LOC101119120	8.16495	5.66873	7.56311	0	0	0	7.13226	0	5.13234	0.00257202	0.00583262
NXPE2	6.12371	21.8651	26.0507	0	2.23904	3.06934	18.0132	1.76946	3.32447	0.00259483	0.00588006
PTPRQ	2.04124	16.1964	20.1683	0	0	1.02311	12.802	0.341037	5.02208	0.00259766	0.00588592
LOC106991600	14.2887	12.1473	10.9245	2.34988	0	0	12.4535	0.783292	4.05639	0.00260435	0.00590056
LOC101106696	10.2062	10.5276	7.56311	0	0	1.02311	9.43231	0.341037	4.5749	0.00261566	0.00592455
WT1	0	0	0	2.34988	33.5856	1.02311	0	12.3195	-6.24002	0.00268187	0.0060657
LOC106991775	16.3299	17.0062	18.4876	1.17494	0	5.11556	17.2746	2.09683	3.00444	0.00274701	0.00620121
LOC101119933	0	0	0.840346	21.1489	2.23904	9.20801	0.280115	10.8653	-5.0952	0.00274737	0.00620144
LOC106991160	5.10309	6.47855	10.0842	0	0	0	7.22193	0	5.15497	0.00277094	0.00625012
-	8.16495	11.3375	8.40346	1.17494	0	0	9.30196	0.391646	4.55766	0.00277535	0.00625927
-	5.10309	9.71782	6.72277	0	0	0	7.18123	0	5.14759	0.0027755	0.00625927
LOC101105274	0	0	0	23.4988	1.11952	5.11556	0	9.91128	-5.92385	0.00278134	0.00626789
LOC105614766	2.04124	10.5276	13.4455	0	0	0	8.67147	0	5.42172	0.00278455	0.00627455
LOC105610224	21.433	2.42946	5.04208	0	0	0	9.63484	0	5.56021	0.00281028	0.00632681
LOC101108949	1.02062	0.809818	3.36138	27.0236	4.47808	19.4391	1.73061	16.9803	-3.28026	0.00281371	0.0063334
-	12.2474	8.09818	13.4455	0	1.11952	1.02311	11.2637	0.714211	3.9458	0.00291918	0.00655657
LOC105616910	17.3505	15.3866	2.52104	0	1.11952	0	11.7527	0.373173	4.88985	0.00295501	0.00662928
CCL21	15.3093	9.71782	5.04208	0	1.11952	0	10.0231	0.373173	4.6577	0.00296897	0.00665878
-	1.02062	0	0	15.2742	13.4342	2.04622	0.340206	10.2516	-5.00949	0.00301681	0.00675817
LOC105611492	17.3505	17.0062	13.4455	0	0	4.09245	15.9341	1.36415	3.48369	0.00301763	0.00675938
LOC101119745	14.2887	16.1964	0.840346	0	0	0	10.4418	0	5.68282	0.00305168	0.00683137
OTOG	10.2062	16.1964	15.1262	0	3.35856	1.02311	13.8429	1.46056	3.24185	0.00305395	0.00683521
LOC105611268	15.3093	3.23927	5.88242	0	0	0	8.14366	0	5.31795	0.00307408	0.0068778
ITK	41.8454	7.28837	5.88242	1.17494	1.11952	2.04622	18.3387	1.44689	3.64334	0.00309593	0.00692232
-	12.2474	6.47855	9.24381	0	0	1.02311	9.32326	0.341037	4.55444	0.0031051	0.00694157
-	1.02062	0.809818	2.52104	10.5744	25.749	6.13867	1.45049	14.154	-3.27396	0.00310627	0.00694358
CRB3	12.2474	7.28837	3.36138	0	0	0	7.63239	0	5.22672	0.00312847	0.00699068
RAX	1.02062	0	0.840346	57.572	0	12.2773	0.620322	23.2831	-5.2671	0.00313176	0.0069974
LOC106991435	10.2062	10.5276	6.72277	0	1.11952	0	9.1522	0.373173	4.53108	0.00314522	0.00702622
GPR20	8.16495	6.47855	5.88242	0	0	0	6.84197	0	5.07215	0.0031661	0.00706906
LOC105612857	3.06186	8.09818	11.7648	0	0	0	7.64163	0	5.23886	0.00319752	0.00713157
LOC101114620	12.2474	15.3866	21.0087	0	0	4.09245	16.2142	1.36415	3.51265	0.00319972	0.00713517
LOC105607987	13.268	11.3375	10.9245	0	2.23904	0	11.8433	0.746347	4.00213	0.00320881	0.00715225
-	1.02062	0	0	1.17494	32.4661	6.13867	0.340206	13.2599	-5.38511	0.0032305	0.0071959
LOC101109189	5.10309	8.908	6.72277	0	0	0	6.91129	0	5.09199	0.00323664	0.0072064
C15H11orf53	2.04124	0	0.840346	11.7494	10.0757	10.2311	0.960528	10.6854	-3.55694	0.00324795	0.00722782
KDF1	0	0	0	21.1489	3.35856	2.04622	0	8.85122	-5.7593	0.00326664	0.00726553
LOC105611192	10.2062	8.09818	8.40346	1.17494	0	0	8.90261	0.391646	4.49018	0.00332784	0.00739107
KLK5	4.08247	0.809818	0.840346	35.2481	17.9123	4.09245	1.91088	19.0843	-3.36517	0.00333277	0.00740136
LOC101117044	1.02062	0	0.840346	3.52481	17.9123	12.2773	0.620322	11.2382	-4.23495	0.00334082	0.00741858
LOC105609492	8.16495	4.85891	7.56311	0	0	0	6.86232	0	5.0761	0.00335148	0.00743961
LOC106990338	12.2474	5.66873	4.20173	0	0	0	7.37263	0	5.17574	0.00335578	0.00744649
LOC101115157	15.3093	12.1473	9.24381	1.17494	1.11952	2.04622	12.2335	1.44689	3.06085	0.00335711	0.00744877
LOC105603985	6.12371	7.28837	6.72277	0	0	0	6.71162	0	5.04762	0.0033759	0.00748646
LOC101102981	5.10309	2.42946	19.328	0	0	0	8.9535	0	5.4642	0.00338477	0.00750547
LOC106991593	10.2062	8.908	7.56311	0	0	1.02311	8.89243	0.341037	4.48874	0.00340739	0.00755267
LOC105601984	14.2887	12.9571	53.7822	0	3.35856	6.13867	27.0093	3.16574	3.07183	0.00340758	0.00755267
GXYLT2	13.268	7.28837	18.4876	1.17494	2.23904	1.02311	13.0147	1.47903	3.14171	0.00346343	0.00766556
LOC106990725	5.10309	5.66873	10.0842	0	0	0	6.95199	0	5.09959	0.00347074	0.00767899
LOC105602543	13.268	10.5276	16.8069	0	0	3.06934	13.5342	1.02311	3.65663	0.00348874	0.00771471
LOC105602135	31.6392	20.2455	14.2859	7.04963	0	1.02311	22.0568	2.69091	3.05995	0.00349314	0.00772136
LOC101105726	0	0	0	3.52481	13.4342	4.09245	0	7.01717	-5.42827	0.00351905	0.00777413
LOC101112827	0	0	0	11.7494	3.35856	5.11556	0	6.74117	-5.36792	0.00352067	0.00777703
LOC106990812	7.14433	8.09818	5.04208	0	0	0	6.76153	0	5.05699	0.00352275	0.00777956
LOC101107809	2.04124	0	0	10.5744	2.23904	37.8551	0.680412	16.8895	-4.75241	0.00353642	0.00780696
HPGDS	5.10309	100.417	47.0594	0	0	9.20801	50.86	3.06934	4.02726	0.0035375	0.00780867
LOC105604300	16.3299	12.9571	10.9245	0	0	3.06934	13.4038	1.02311	3.64038	0.00355847	0.00785146
LCT	8.16495	13.7669	15.1262	2.34988	1.11952	1.02311	12.3527	1.4975	3.06725	0.0036284	0.0079909
ALAS2	0	0.809818	5.04208	16.4491	25.749	11.2542	1.95063	17.8174	-3.1547	0.00363786	0.00800959
-	3.06186	10.5276	8.40346	0	0	0	7.33099	0	5.17956	0.00365014	0.00803591
HYAL4	7.14433	3.23927	11.7648	0	0	0	7.38282	0	5.18348	0.00365902	0.00805101
TRPA1	0	0	0	4.69975	3.35856	12.2773	0	6.77855	-5.38326	0.00366869	0.00806979
-	0	0	0	2.34988	16.7928	4.09245	0	7.74504	-5.57095	0.00366883	0.00806979
-	15.3093	14.5767	6.72277	0	0	2.04622	12.2029	0.682075	4.08231	0.0036984	0.00812851
LOC105603295	10.2062	6.47855	4.20173	0	0	0	6.96215	0	5.0948	0.00372921	0.00819334
-	2.04124	0.809818	0	11.7494	19.0318	5.11556	0.950352	11.9656	-3.7181	0.00373677	0.00820776
LOC101113215	11.2268	11.3375	5.04208	1.17494	0	0	9.20211	0.391646	4.53798	0.00374483	0.00822112
TCTEX1D4	5.10309	4.85891	1.68069	72.8462	16.7928	5.11556	3.8809	31.5848	-3.02807	0.00376966	0.00826981
LOC105612526	4.08247	17.816	8.40346	0	1.11952	0	10.1006	0.373173	4.6811	0.00377068	0.0082713
LOC106990142	6.12371	25.9142	9.24381	0	0	2.04622	13.7606	0.682075	4.26796	0.00385455	0.00844115
LOC105615133	33.6804	9.71782	10.9245	1.17494	0	4.09245	18.1076	1.7558	3.32771	0.00388806	0.00850929
LOC106991379	0	1.61964	0	36.4231	8.95616	2.04622	0.539879	15.8085	-4.79657	0.00391625	0.00856346
LOC106991589	3.06186	5.66873	14.2859	0	0	0	7.67216	0	5.24381	0.00392115	0.00857192
COL20A1	15.3093	11.3375	11.7648	2.34988	2.23904	0	12.8039	1.52964	3.09833	0.00392391	0.0085757
LOC105615239	16.3299	12.9571	10.0842	1.17494	0	3.06934	13.1237	1.41476	3.1767	0.00396987	0.00867158
LOC105611815	13.268	7.28837	2.52104	0	0	0	7.69248	0	5.23759	0.00398975	0.00871271
ADGRG2	2.04124	0	4.20173	18.799	7.83664	26.6009	2.08099	17.7455	-3.10061	0.00400182	0.00873829
-	0	0	0.840346	0	36.9442	12.2773	0.280115	16.4072	-5.69289	0.00400378	0.00874182
HBM	0	0	3.36138	27.0236	23.5099	4.09245	1.12046	18.2086	-3.98637	0.004007	0.00874808
LOC105614855	0	0	1.68069	14.0993	5.5976	12.2773	0.560231	10.6581	-4.20049	0.00401277	0.00875837
LOC106991285	19.3918	3.23927	3.36138	0	0	0	8.66414	0	5.40647	0.00402721	0.00878757
-	0	0.809818	0	9.3995	2.23904	16.3698	0.269939	9.33611	-4.88224	0.00412274	0.00898028
LOC101112702	1.02062	0	0.840346	17.6241	6.71712	6.13867	0.620322	10.16	-4.0833	0.00412884	0.0089912
LOC105602744	3.06186	8.09818	10.0842	0	0	0	7.0814	0	5.12911	0.00417468	0.00908546
-	11.2268	8.09818	15.1262	0	0	2.04622	11.4837	0.682075	3.99573	0.00418139	0.00909847
LOC106991042	63.2783	64.7855	46.219	0	20.1514	1.02311	58.0943	7.05816	3.04308	0.00437513	0.00947698
LRRC52	0	1.61964	0.840346	18.799	6.71712	7.16178	0.819994	10.8926	-3.66054	0.00450587	0.00973983
RXFP2	0	0	0	4.69975	5.5976	7.16178	0	5.81971	-5.16074	0.0045144	0.00975741
FAM83F	1.02062	0	0.840346	25.8486	5.5976	4.09245	0.620322	11.8462	-4.29953	0.00451893	0.00976467
LOC105612041	11.2268	8.09818	2.52104	0	0	0	7.28201	0	5.15991	0.00453639	0.0098007
LOC105606493	6.12371	4.85891	8.40346	0	0	0	6.46203	0	4.99195	0.00454374	0.00981496
-	0	1.61964	0	3.52481	22.3904	10.2311	0.539879	12.0488	-4.40243	0.00456025	0.00984882
TNP2	0	0.809818	0.840346	4.69975	26.8685	4.09245	0.550055	11.8869	-4.37007	0.00459031	0.00990858
LOC101111829	5.10309	8.09818	13.4455	0	0	1.02311	8.88227	0.341037	4.49358	0.00459684	0.0099201

## Sheet: Pituitary
Supplementary table S3 DEGs identified in pituitary between estrus group and anestrus group
DEGs	EC1	EC2	EC3	TC1_12	TC1_13	TC1_14	EC	FTC	log2FoldChange	pvalue	padj
IGFBP6	301.416	382.384	489.462	6656.07	7850.12	6045.27	391.087	6850.48	-4.13139	1.28442e-91	2.9597e-87
LOC105616742	5368.41	4444.53	4307.41	492.067	389.064	362.044	4706.79	414.392	3.50627	7.48071e-83	8.6189e-79
SYNE1	19025.1	16613.8	14305.4	1828.27	1843.57	2148.63	16648.1	1940.15	3.10088	3.15171e-79	2.42083e-75
-	1296.73	1165.06	1147.22	102.572	91.2804	84.6014	1203.01	92.8178	3.69793	1.64871e-78	6.33188e-75
LOC101112291	22975	16906.7	14881.6	1624.51	1331.8	1274	18254.4	1410.1	3.69449	2.21326e-78	7.28572e-75
NBEAL1	2970.55	2477.32	2245.94	271.676	290.302	291.128	2564.6	284.369	3.17297	8.88515e-72	2.55926e-68
ANKRD12	3407.29	2732.76	2625.9	371.476	348.661	337.161	2921.98	352.433	3.05197	6.81597e-69	1.74511e-65
GLS	3972.92	3183.68	2664.11	364.545	326.215	334.673	3273.57	341.811	3.25962	1.51424e-64	3.48925e-61
SPON2	24.3698	28.8151	47.7703	772.059	652.431	850.99	33.6517	758.493	-4.49964	5.99889e-63	1.25666e-59
ZNF605	2589.61	2158.8	1961.52	282.765	270.848	221.457	2236.64	258.357	3.11576	4.70496e-61	8.76388e-58
KIAA1109	3569.54	3306.73	2500.96	385.337	375.596	384.439	3125.74	381.791	3.03328	5.30212e-61	8.76388e-58
-	735.584	779.565	656.291	58.2163	47.8848	67.1835	723.813	57.7615	3.64046	2.47592e-55	2.28211e-52
VGF	160.969	168.218	270.454	2264.89	1985.72	2538.04	199.88	2262.89	-3.50187	1.40906e-54	1.24881e-51
LOC105606646	1069.71	1042.79	1015.67	121.977	76.3164	73.4041	1042.72	90.5659	3.52659	1.57618e-54	1.34518e-51
LOC101109728	691.333	831.744	612.93	54.058	37.41	36.08	712.002	42.516	4.0673	5.98664e-54	4.7569e-51
-	16772.2	15247.9	13397	1424.91	629.985	1055.03	15139	1036.64	3.86783	7.58055e-54	5.82262e-51
ALMS1	3157.17	2752.23	2082.05	293.854	342.676	322.232	2663.82	319.587	3.05965	1.22075e-53	8.52419e-51
SCN9A	573.973	960.244	757.711	30.4943	38.9064	24.8828	763.976	31.4278	4.61293	1.57747e-53	1.06911e-50
LY6D	334.764	246.096	337.332	2646.07	3741	2454.68	306.064	2947.25	-3.2664	2.61213e-52	1.62679e-49
TRHR	1732.82	1588.72	1459.57	142.769	164.604	228.921	1593.7	178.765	3.15262	5.80599e-51	3.34468e-48
SYDE2	706.725	658.853	621.014	73.4635	65.8416	72.16	662.197	70.4884	3.23035	4.64977e-50	2.55106e-47
EML6	2504.32	1735.14	1621.99	173.263	184.057	228.921	1953.81	195.414	3.31999	6.53455e-50	3.50176e-47
-	91.7075	67.7544	97.0105	712.457	773.639	730.309	85.4908	738.802	-3.10864	6.90426e-50	3.54106e-47
DNAH7	2183.66	1507.73	1705.77	199.599	196.028	250.072	1799.05	215.233	3.06136	3.57351e-49	1.64689e-46
LOC105612255	671.453	548.266	515.92	29.1082	43.3956	24.8828	578.546	32.4622	4.16933	6.19121e-49	2.79733e-46
N4BP2	2482.52	2056.77	1708.71	302.17	215.482	206.527	2082.67	241.393	3.10961	2.1418e-46	7.83388e-44
ZBTB37	1569.93	1300.57	1240.56	148.313	184.057	104.508	1370.35	145.626	3.23987	7.95156e-46	2.58067e-43
GTL2	12694.8	11486.3	10644.7	1774.21	876.891	1087.38	11608.6	1246.16	3.2195	4.59603e-42	1.09182e-39
UBN2	1009.42	852.771	695.242	44.3553	46.3884	89.5779	852.479	60.1072	3.81534	8.28223e-41	1.78362e-38
PRSS12	26.2938	21.806	33.0718	302.17	505.783	445.401	27.0572	417.785	-3.9471	5.55323e-40	1.07532e-37
LOC105605560	346.949	359.799	493.137	5.54441	5.9856	13.6855	399.962	8.40518	5.53929	6.63483e-39	1.17605e-36
SDF2L1	711.214	1290.45	650.411	7633.27	9359.98	7586.75	884.025	8193.34	-3.21273	1.01118e-38	1.68845e-36
PLCXD3	466.874	727.386	628.364	56.8302	62.8488	55.9862	607.541	58.5551	3.37643	1.9989e-38	3.22102e-36
LOC105605886	1293.52	1059.93	787.843	124.749	115.223	145.564	1047.1	128.512	3.02421	3.27826e-37	4.60615e-35
ADGRV1	3064.83	2166.58	1526.45	245.34	261.87	268.734	2252.62	258.648	3.12255	5.80618e-37	7.9638e-35
TRMT13	683.638	471.166	492.402	59.6024	53.8704	44.789	549.068	52.7539	3.38379	1.03562e-36	1.39554e-34
LOC101104348	2870.51	1929.05	1377.26	112.274	71.8272	192.841	2058.94	125.648	4.02891	1.26722e-34	1.50043e-32
-	96.1967	95.0119	75.6976	838.592	514.762	839.793	88.9687	731.049	-3.0389	4.72652e-34	5.31284e-32
SCAI	1030.59	769.441	669.52	127.521	94.2732	87.0897	823.182	102.961	3.00073	2.0836e-33	2.21256e-31
LOC106991688	202.654	313.851	280.008	3298.93	1610.13	2218.3	265.504	2375.78	-3.16277	5.54098e-33	5.55611e-31
TET1	455.972	432.226	358.645	47.1275	20.9496	38.5683	415.615	35.5485	3.53856	3.45868e-32	3.12542e-30
-	474.57	390.172	355.705	40.197	38.9064	53.4979	406.816	44.2004	3.19588	1.67396e-31	1.39253e-29
-	379.015	281.921	328.513	33.2665	20.9496	24.8828	329.816	26.3663	3.64305	1.89455e-31	1.57036e-29
C1H1orf111	275.764	244.539	293.971	22.1777	13.4676	7.46483	271.425	14.37	4.25441	2.78522e-29	1.89881e-27
ACRC	278.329	253.106	207.25	15.2471	8.9784	7.46483	246.228	10.5635	4.55035	1.28343e-28	8.28404e-27
-	987.619	885.48	798.132	142.769	106.244	55.9862	890.41	101.666	3.13589	2.13048e-28	1.33404e-26
UBE2C	10.261	15.5757	5.1445	252.271	167.597	218.968	10.3271	212.945	-4.37379	2.27012e-28	1.41763e-26
MDM4	422.624	362.914	277.803	34.6526	22.446	38.5683	354.447	31.889	3.46477	2.85932e-28	1.77117e-26
-	391.2	361.357	319.694	18.0193	46.3884	32.3476	357.417	32.2518	3.47779	4.89469e-28	2.96032e-26
CDC20	7.69573	14.0182	5.87943	259.201	154.129	194.086	9.19777	202.472	-4.47362	7.38628e-28	4.36416e-26
SFRP4	107.74	73.2059	180.057	1391.65	884.373	1760.46	120.335	1345.49	-3.48304	8.3341e-28	4.84956e-26
ABRACL	45.5331	49.0635	53.6498	426.92	1087.88	460.331	49.4155	658.378	-3.73558	2.11074e-27	1.17483e-25
PRTG	314.242	320.081	223.418	26.336	13.4676	22.3945	285.914	20.7327	3.77639	2.70577e-27	1.48097e-25
LOC105602314	465.592	329.427	284.417	37.4248	20.9496	33.5917	359.812	30.6554	3.54629	3.30459e-27	1.79171e-25
-	432.885	407.305	368.934	47.1275	25.4388	59.7186	403.041	44.095	3.1789	4.14763e-27	2.22265e-25
-	5.7718	4.67272	2.93971	155.244	172.086	123.17	4.46141	150.166	-5.05899	4.64443e-27	2.4831e-25
ZBTB20	1037	922.862	751.097	66.533	49.3812	139.343	903.653	85.0859	3.3992	5.12511e-27	2.72744e-25
PGAP1	352.721	289.709	236.647	30.4943	25.4388	23.6386	293.025	26.5239	3.46846	5.83466e-27	3.08367e-25
PHC3	651.572	572.408	490.197	60.9885	40.4028	95.7986	571.392	65.73	3.10905	1.29565e-26	6.69408e-25
DNAH5	317.449	440.793	266.779	34.6526	31.4244	34.8359	341.674	33.6376	3.34201	1.43323e-26	7.35543e-25
CHML	721.475	391.73	601.171	55.4441	56.8632	82.1131	571.459	64.8068	3.13574	1.58877e-26	8.08166e-25
ZNF483	394.406	362.914	311.61	24.9499	10.4748	41.0566	356.31	25.4937	3.78109	2.09389e-26	1.04663e-24
-	225.1	244.539	249.141	8.31662	10.4748	22.3945	239.593	13.7286	4.0989	2.32377e-26	1.15652e-24
-	22.4459	33.4878	30.867	273.062	221.467	243.851	28.9336	246.127	-3.09562	2.35842e-26	1.17123e-24
FXYD5	60.2832	77.0998	74.9627	870.473	398.042	546.177	70.7819	604.897	-3.09737	1.54463e-25	7.09023e-24
BFSP2	128.904	80.9938	135.962	1613.42	1669.98	615.848	115.286	1299.75	-3.49324	1.9467e-25	8.79563e-24
-	296.286	215.724	200.635	13.861	8.9784	18.6621	237.548	13.8338	4.08379	2.74901e-25	1.22288e-23
PIWIL3	407.874	398.739	350.561	59.6024	43.3956	23.6386	385.724	42.2122	3.20119	2.90444e-25	1.28459e-23
-	350.797	287.372	244.731	31.8804	29.928	37.3241	294.3	33.0442	3.1506	4.001e-25	1.74282e-23
SPC24	1.28262	3.89393	2.20478	164.946	124.201	129.39	2.46045	139.513	-5.86337	1.23598e-24	5.13167e-23
C3H2orf40	44.2505	25.6999	81.577	626.519	451.913	643.219	50.5091	573.884	-3.50558	1.26882e-24	5.23032e-23
LOC106991747	1551.33	1294.34	1016.41	219.004	74.82	128.146	1287.36	140.657	3.19253	1.53002e-24	6.28452e-23
CDCA3	6.41311	14.0182	11.7589	232.865	133.18	184.132	10.73	183.392	-4.11206	3.16235e-24	1.25855e-22
SORCS3	10.9023	5.4515	12.4938	123.363	516.258	276.199	9.61586	305.273	-4.98017	5.41128e-24	2.10273e-22
-	429.678	311.515	252.815	12.4749	17.9568	37.3241	331.336	22.5853	3.85715	8.27336e-24	3.14074e-22
-	23.0872	29.5939	17.6383	587.708	179.568	354.579	23.4398	373.952	-3.99843	3.74268e-23	1.32071e-21
IMPG2	217.404	190.024	152.13	11.0888	8.9784	8.70897	186.519	9.59206	4.28369	5.92718e-23	2.06314e-21
TYMS	17.3154	16.3545	19.8431	177.421	179.568	149.297	17.8377	168.762	-3.24073	8.02738e-23	2.7526e-21
LOC105604044	12.8262	9.34544	29.3971	173.263	314.244	334.673	17.1896	274.06	-3.99612	6.00971e-22	1.85882e-20
ATP7A	530.364	377.711	341.007	63.7607	25.4388	52.2538	416.361	47.1511	3.13571	6.24616e-22	1.92678e-20
LCORL	266.785	283.478	196.961	30.4943	32.9208	22.3945	249.075	28.6032	3.13049	1.20935e-21	3.64752e-20
MBP	32.7069	38.1605	49.2402	264.746	894.847	414.298	40.0359	524.63	-3.71254	1.52221e-21	4.53181e-20
LOC106991537	275.122	176.785	168.299	6.93052	11.9712	17.4179	206.735	12.1066	4.0812	3.62418e-21	1.03871e-19
-	221.252	147.969	200.635	8.31662	17.9568	11.1972	189.952	12.4902	3.94089	4.05896e-21	1.15756e-19
TNFRSF6B	21.8046	21.0272	8.08421	167.718	218.474	207.771	16.972	197.988	-3.53995	4.14927e-21	1.18039e-19
PLAG1	305.264	224.29	185.937	26.336	7.482	14.9297	238.497	16.2492	3.86818	4.19873e-21	1.19005e-19
RRM2	8.33704	14.7969	11.7589	166.332	263.366	116.949	11.6309	182.216	-3.97739	5.26813e-21	1.48041e-19
-	486.114	206.378	224.888	23.5638	5.9856	6.22069	305.793	11.9233	4.68473	7.0332e-21	1.93859e-19
-	205.861	193.918	138.901	15.2471	10.4748	6.22069	179.56	10.6475	4.08993	1.57497e-20	4.19078e-19
-	263.579	242.981	116.119	1.3861	7.482	8.70897	207.56	5.85902	5.1364	3.34493e-20	8.61197e-19
LOC105602261	189.828	192.36	169.033	15.2471	8.9784	22.3945	183.741	15.54	3.54136	4.45996e-20	1.12811e-18
LGALS1	38.4787	40.4969	55.1196	921.759	264.863	419.275	44.6984	535.299	-3.58311	4.48193e-20	1.13242e-18
PTAR1	233.437	204.821	181.527	20.7915	31.4244	22.3945	206.595	24.8701	3.06252	8.9761e-20	2.19106e-18
LRRC58	185.339	155.757	138.901	6.93052	14.964	7.46483	159.999	9.78645	4.05299	1.48191e-19	3.5313e-18
-	208.426	155.757	135.227	11.0888	8.9784	13.6855	166.47	11.2509	3.87645	2.39772e-19	5.54168e-18
USP45	307.829	203.263	187.407	24.9499	16.4604	4.97655	232.833	15.4623	3.93187	3.48137e-19	7.91917e-18
-	207.143	173.669	207.985	18.0193	31.4244	22.3945	196.266	23.9461	3.04305	7.339e-19	1.61985e-17
-	465.592	370.702	299.851	37.4248	13.4676	58.4745	378.715	36.4556	3.36064	8.5581e-19	1.87635e-17
BIRC5	7.05442	16.3545	11.0239	187.124	172.086	100.775	11.4776	153.328	-3.75255	2.17149e-18	4.55266e-17
-	182.132	190.803	113.179	9.70272	13.4676	4.97655	162.038	9.38229	4.13613	4.00561e-18	8.17548e-17
SERPINA1	21.8046	24.9212	34.5416	795.623	143.654	398.124	27.0891	445.801	-4.04265	4.15623e-18	8.46791e-17
NPW	56.4354	56.8514	44.0957	352.07	863.423	284.908	52.4608	500.134	-3.25129	5.79495e-18	1.16725e-16
LRGUK	125.697	147.191	132.287	9.70272	10.4748	11.1972	135.058	10.4583	3.68793	1.61472e-17	3.10326e-16
HIF3A	352.721	319.302	387.307	24.9499	20.9496	69.6717	353.11	38.5237	3.17897	1.9427e-17	3.70271e-16
LOC101105437	10.9023	3.11515	19.8431	35543.8	1744.8	8211.31	11.2868	15166.7	-10.391	5.20368e-17	9.47892e-16
-	259.731	146.412	135.227	15.2471	16.4604	16.1738	180.457	15.9604	3.50081	1.16475e-16	2.0488e-15
LOC101110131	227.024	188.466	146.251	20.7915	29.928	18.6621	187.247	23.1272	3.02805	1.30661e-16	2.28092e-15
LOC106991735	388.634	286.593	111.709	20.7915	14.964	19.9062	262.312	18.5539	3.81787	1.4654e-16	2.54463e-15
DKK4	1.92393	3.11515	3.67464	80.394	64.3452	118.193	2.90457	87.6441	-4.93458	1.76184e-16	3.02294e-15
-	202.654	163.545	137.432	12.4749	2.9928	19.9062	167.877	11.7913	3.79815	1.95168e-16	3.33553e-15
LOC101108763	17.3154	7.78786	15.4335	267.518	83.7984	227.677	13.5123	192.998	-3.82912	3.58718e-16	5.9725e-15
TCF19	28.859	9.34544	17.6383	202.371	219.971	134.367	18.6142	185.57	-3.30207	5.42373e-16	8.84494e-15
-	249.47	168.218	140.371	26.336	8.9784	14.9297	186.02	16.748	3.46893	5.5128e-16	8.97749e-15
GRM7	259.09	216.503	420.379	16.6332	49.3812	13.6855	298.657	26.5667	3.50946	6.09969e-16	9.87738e-15
LOC101112623	135.317	132.394	114.649	9.70272	14.964	9.9531	127.453	11.5399	3.47675	8.42398e-16	1.34521e-14
GAL	0	0	2.20478	575.233	1765.75	548.665	0.734928	963.217	-10.3784	9.41495e-16	1.49003e-14
-	293.079	134.73	160.214	18.0193	11.9712	22.3945	196.008	17.4617	3.47834	1.00111e-15	1.58004e-14
ALAS2	0.641311	0.778786	0.734928	669.488	25.4388	182.888	0.718342	292.605	-8.67735	1.016e-15	1.60245e-14
-	274.481	130.057	249.141	31.8804	16.4604	21.1503	217.893	23.1637	3.23217	1.35494e-15	2.10674e-14
LOC101102366	123.773	135.509	103.625	5.54441	4.4892	0	120.969	3.34454	5.23116	1.5939e-15	2.44854e-14
-	0	1.55757	2.20478	42.9692	209.496	125.658	1.25412	126.041	-6.70501	1.6974e-15	2.59715e-14
PR	112.229	120.712	123.468	9.70272	10.4748	11.1972	118.803	10.4583	3.50319	1.98091e-15	2.99318e-14
LOC101105208	18.598	25.6999	33.8067	379.792	110.734	345.87	26.0349	278.799	-3.42549	2.30817e-15	3.45371e-14
NCAM2	513.69	274.133	242.526	63.7607	37.41	27.371	343.45	42.8473	3.00733	3.25691e-15	4.79546e-14
LOC105606170	5.7718	7.78786	5.1445	98.4133	76.3164	80.869	6.23472	85.1996	-3.77895	3.67706e-15	5.39341e-14
LOC105604063	96.838	306.063	216.069	19.4054	8.9784	3.73241	206.323	10.7054	4.28043	3.82763e-15	5.59291e-14
LOC106991484	246.263	181.457	178.588	26.336	34.4172	9.9531	202.103	23.5688	3.12049	4.19775e-15	6.10277e-14
LOC105607964	123.773	158.872	96.2756	11.0888	10.4748	8.70897	126.307	10.0909	3.65054	4.77572e-15	6.90816e-14
DUSP2	4.48918	5.4515	4.40957	284.151	46.3884	105.752	4.78342	145.43	-4.93003	5.30681e-15	7.6428e-14
-	100.686	108.251	194.756	9.70272	0	4.97655	134.564	4.89309	4.75607	8.27652e-15	1.17364e-13
-	5.13049	5.4515	3.67464	45.7414	112.23	171.691	4.75221	109.887	-4.53269	8.71134e-15	1.23302e-13
MATN4	3.20656	3.89393	5.87943	210.688	86.7912	52.2538	4.32664	116.578	-4.75756	1.02272e-14	1.43348e-13
-	189.828	122.269	155.805	20.7915	23.9424	13.6855	155.967	19.4732	3.01472	1.3712e-14	1.89655e-13
GNAT2	128.262	119.154	105.83	13.861	11.9712	8.70897	117.749	11.5137	3.36341	1.78082e-14	2.43389e-13
-	203.937	126.163	194.021	24.9499	10.4748	26.1269	174.707	20.5172	3.07661	2.42548e-14	3.26844e-13
C15H11orf42	235.361	137.066	145.516	23.5638	8.9784	22.3945	172.648	18.3122	3.22456	2.57314e-14	3.44727e-13
LOC105602262	100.686	122.269	91.1311	5.54441	2.9928	8.70897	104.695	5.74873	4.15518	3.38975e-14	4.45834e-13
LOC105607433	143.012	115.26	110.974	12.4749	11.9712	16.1738	123.082	13.54	3.17692	3.7492e-14	4.89755e-13
PKHD1	123.132	154.978	72.023	2.77221	1.4964	4.97655	116.711	3.08172	5.20351	4.29517e-14	5.56657e-13
-	167.382	141.739	65.4086	5.54441	5.9856	6.22069	124.843	5.9169	4.39842	4.84151e-14	6.24158e-13
-	166.1	112.145	119.793	6.93052	13.4676	18.6621	132.679	13.0201	3.33885	8.4766e-14	1.06619e-12
IL2RG	26.2938	14.0182	22.0478	268.904	88.2876	243.851	20.7866	200.348	-3.26465	1.08572e-13	1.34797e-12
-	147.502	113.703	120.528	5.54441	4.4892	18.6621	127.244	9.56523	3.69572	1.29918e-13	1.60005e-12
MUSTN1	19.8806	28.8151	24.9876	381.178	125.698	155.517	24.5611	220.798	-3.17184	1.67612e-13	2.03599e-12
TPSB2	0	0	3.67464	1501.15	2623.19	843.526	1.22488	1655.96	-10.4132	1.69341e-13	2.05416e-12
LOC105606369	133.393	114.482	100.685	4.15831	13.4676	13.6855	116.186	10.4371	3.47393	2.37172e-13	2.8361e-12
-	163.534	118.376	119.058	8.31662	19.4532	18.6621	133.656	15.4773	3.1107	2.67071e-13	3.17059e-12
-	196.882	148.748	113.179	11.0888	16.4604	26.1269	152.937	17.892	3.08421	3.34562e-13	3.92531e-12
ASXL3	157.763	152.642	171.238	29.1082	23.9424	7.46483	160.548	20.1718	3.01007	4.19606e-13	4.86857e-12
FCMR	12.1849	7.00908	8.08421	77.6218	83.7984	104.508	9.09273	88.6426	-3.27424	4.25464e-13	4.93157e-12
LOC106990316	107.099	107.473	131.552	15.2471	8.9784	16.1738	115.375	13.4664	3.08601	5.97045e-13	6.80401e-12
S100A4	7.69573	7.00908	8.08421	371.476	67.338	64.6952	7.59634	167.836	-4.46448	1.33211e-12	1.45616e-11
CRABP1	12.8262	15.5757	25.7225	313.259	98.7624	133.123	18.0415	181.715	-3.33581	1.42609e-12	1.55182e-11
-	157.763	105.915	106.565	20.7915	7.482	9.9531	123.414	12.7422	3.27505	2.07807e-12	2.221e-11
MIR374B	99.4032	66.9756	100.685	4.15831	4.4892	1.24414	89.0213	3.29722	4.7922	2.25797e-12	2.39551e-11
TTR	3.20656	0	6.61435	347.912	347.165	160.494	3.27364	285.19	-6.43636	2.5325e-12	2.66468e-11
LOC101108797	1.92393	4.67272	10.289	11054.2	225.956	2704.76	5.62855	4661.63	-9.69707	2.8259e-12	2.95852e-11
MFAP5	8.33704	8.56665	36.7464	243.954	127.194	248.828	17.8834	206.659	-3.53531	3.66683e-12	3.78222e-11
LOC101105114	10.9023	3.11515	6.61435	293.854	29.928	175.423	6.87726	166.402	-4.58266	4.01643e-12	4.12069e-11
KIAA0101	7.05442	17.1333	5.1445	156.63	151.136	59.7186	9.77741	122.495	-3.65728	6.31035e-12	6.30297e-11
LOC105611150	130.186	88.7816	74.2277	0	0	0	97.7318	0	8.59881	7.05482e-12	7.00406e-11
TNS4	2.56524	0	2.20478	87.3245	43.3956	53.4979	1.59001	61.406	-5.22536	8.55185e-12	8.42138e-11
AURKB	3.84787	3.89393	3.67464	73.4635	38.9064	82.1131	3.80548	64.8277	-4.09385	8.64076e-12	8.49442e-11
LOC105609383	215.481	125.385	97.7454	15.2471	23.9424	12.4414	146.204	17.2103	3.10058	9.11575e-12	8.93848e-11
PLAC9	5.7718	3.11515	6.61435	128.908	34.4172	105.752	5.1671	89.6922	-4.11206	9.34345e-12	9.13454e-11
LOC105606998	125.697	73.2059	120.528	12.4749	0	2.48828	106.477	4.98773	4.41055	9.88587e-12	9.63214e-11
-	159.686	91.118	82.312	11.0888	13.4676	7.46483	111.039	10.6738	3.39429	1.2085e-11	1.16809e-10
LOC105605488	115.436	67.7544	85.2517	0	1.4964	6.22069	89.4807	2.57236	5.05288	1.22397e-11	1.18156e-10
FAM228A	187.263	124.606	138.166	27.7221	20.9496	6.22069	150.012	18.2975	3.05273	1.34527e-11	1.29217e-10
TMEM176A	16.6741	11.6818	31.6019	277.221	109.237	133.123	19.9859	173.194	-3.11519	1.45881e-11	1.39194e-10
LOC105605855	74.3921	83.3301	143.311	5.54441	11.9712	6.22069	100.344	7.9121	3.68176	1.63751e-11	1.55408e-10
LOC106990526	96.1967	99.6847	113.914	5.54441	17.9568	11.1972	103.265	11.5662	3.1703	1.71186e-11	1.61981e-10
LOC105607573	72.4681	70.0908	100.685	1.3861	4.4892	6.22069	81.0814	4.032	4.31179	2.00736e-11	1.8903e-10
TRNAC-GCA	85.2944	89.5604	72.7579	6.93052	5.9856	8.70897	82.5376	7.20836	3.50618	2.73592e-11	2.53902e-10
ZC3H12B	71.8268	85.6665	72.023	4.15831	2.9928	6.22069	76.5054	4.45727	4.0772	2.80631e-11	2.6012e-10
-	166.1	84.1089	77.1675	11.0888	8.9784	9.9531	109.125	10.0068	3.44711	2.82309e-11	2.6157e-10
LRRC19	162.893	82.5514	79.3722	0	0	3.73241	108.272	1.24414	6.32564	3.51657e-11	3.21048e-10
REL	170.589	127.721	102.155	9.70272	10.4748	27.371	133.488	15.8495	3.05319	3.78117e-11	3.44537e-10
LOC106991522	169.306	147.969	132.287	33.2665	13.4676	6.22069	149.854	17.6516	3.0959	4.00997e-11	3.64215e-10
CDCA8	2.56524	3.89393	2.20478	81.7801	41.8992	48.5214	2.88799	57.4002	-4.3233	4.08304e-11	3.70124e-10
-	1.92393	0.778786	5.1445	76.2357	47.8848	52.2538	2.61574	58.7914	-4.48935	4.51641e-11	4.05895e-10
FOSB	21.8046	51.3999	11.7589	464.345	125.698	250.072	28.3211	280.038	-3.31107	7.20418e-11	6.34579e-10
LOC105604828	85.2944	111.366	93.3359	15.2471	13.4676	7.46483	96.6656	12.0599	3.01529	7.312e-11	6.43805e-10
LOC106991474	133.393	92.6756	83.7818	11.0888	4.4892	16.1738	103.283	10.5839	3.26244	7.4761e-11	6.57024e-10
UHRF1	4.48918	11.6818	8.08421	108.116	77.8128	57.2303	8.08506	81.0531	-3.34051	8.43344e-11	7.37782e-10
LOC101104153	5.13049	7.78786	6.61435	73.4635	59.856	58.4745	6.5109	63.9313	-3.30454	9.72504e-11	8.45638e-10
KCNH5	59.0006	75.5423	83.7818	4.15831	1.4964	2.48828	72.7749	2.71433	4.73468	9.81001e-11	8.52062e-10
LOC101123368	126.98	82.5514	74.2277	5.54441	2.9928	13.6855	94.5862	7.40758	3.63874	1.21534e-10	1.04596e-09
LOC105602007	90.4249	91.8968	58.0593	2.77221	7.482	7.46483	80.127	5.90635	3.75949	1.38411e-10	1.18258e-09
-	109.023	101.242	85.9866	19.4054	7.482	9.9531	98.7506	12.2802	3.00549	1.42575e-10	1.21635e-09
-	133.393	108.251	88.9263	2.77221	16.4604	16.1738	110.19	11.8021	3.22129	1.65228e-10	1.39463e-09
POMC	59781.7	159901	151021	1.38734e+06	603172	1.30838e+06	123568	1.09963e+06	-3.15364	2.12686e-10	1.77377e-09
HCRTR2	1.28262	0.778786	0.734928	58.2163	112.23	21.1503	0.932112	63.8656	-6.07227	2.38627e-10	1.97865e-09
LOC105607669	60.9245	83.3301	83.0469	5.54441	4.4892	8.70897	75.7672	6.24753	3.57921	2.57946e-10	2.12889e-09
ZNF529	105.816	166.66	67.6134	5.54441	11.9712	16.1738	113.363	11.2298	3.32518	2.7112e-10	2.2306e-09
CCL19	7.05442	1.55757	5.1445	158.016	59.856	38.5683	4.5855	85.48	-4.19843	3.16534e-10	2.57644e-09
-	66.055	52.1787	137.432	4.15831	5.9856	0	85.2218	3.3813	4.71162	4.15123e-10	3.31681e-09
LRP1B	74.3921	53.7363	82.312	6.93052	4.4892	2.48828	70.1468	4.636	3.93626	5.7253e-10	4.47517e-09
LOC105614182	96.1967	70.0908	60.2641	0	5.9856	0	75.5172	1.9952	5.34864	6.65473e-10	5.15619e-09
RETN	8.97835	7.00908	5.1445	178.807	20.9496	143.076	7.04398	114.278	-4.01689	7.10523e-10	5.48679e-09
LOC106991740	164.817	95.0119	109.504	18.0193	19.4532	2.48828	123.111	13.3203	3.23447	7.46321e-10	5.74782e-09
-	78.2399	75.5423	77.9024	1.3861	11.9712	6.22069	77.2282	6.526	3.58522	8.00755e-10	6.14241e-09
-	182.774	123.048	124.938	23.5638	19.4532	1.24414	143.587	14.7537	3.30552	8.25624e-10	6.31636e-09
LOC101102683	53.8701	116.039	60.2641	2389.64	606.042	934.348	76.7245	1310.01	-4.09473	1.00471e-09	7.58817e-09
LOC105606235	103.892	59.1878	71.288	1.3861	1.4964	9.9531	78.1227	4.27854	4.1334	1.07056e-09	8.05122e-09
LOC106990835	86.577	61.5241	53.6498	4.15831	5.9856	3.73241	67.2503	4.62544	3.87766	1.1934e-09	8.91975e-09
HJURP	6.41311	7.78786	3.67464	62.3746	52.374	58.4745	5.95854	57.741	-3.27886	1.28015e-09	9.53104e-09
LOC105611819	80.1639	49.8423	69.0832	2.77221	1.4964	1.24414	66.3632	1.83758	5.18478	1.44799e-09	1.06976e-08
SYNDIG1L	5.13049	37.3817	31.6019	246.726	118.216	317.255	24.7047	227.399	-3.21242	1.56721e-09	1.15304e-08
TREM2	0	4.67272	4.40957	112.274	38.9064	47.2772	3.02743	66.1527	-4.48802	2.29034e-09	1.65184e-08
LOC101115778	0.641311	2.33636	8.08421	167.718	43.3956	43.5448	3.68729	84.8863	-4.5414	2.64056e-09	1.88088e-08
LOC105607702	71.8268	65.4181	79.3722	0	4.4892	9.9531	72.2057	4.8141	3.87044	2.84216e-09	2.01019e-08
-	98.7619	87.2241	124.203	2.77221	22.446	9.9531	103.396	11.7238	3.15988	2.84901e-09	2.01441e-08
SLC28A3	7.69573	4.67272	5.1445	112.274	44.892	44.789	5.83765	67.3184	-3.51668	3.22549e-09	2.25981e-08
LOC101107188	95.5553	73.9847	75.6976	0	1.4964	0	81.7459	0.4988	7.37895	3.74709e-09	2.60544e-08
LOC105603421	57.718	52.9575	80.1072	2.77221	5.9856	0	63.5942	2.91927	4.51411	3.78312e-09	2.6297e-08
-	1.92393	1.55757	1.46986	37.4248	157.122	13.6855	1.65045	69.4108	-5.38319	4.16172e-09	2.87293e-08
MMP9	5.13049	3.89393	2.20478	195.441	10.4748	84.6014	3.74307	96.8389	-4.68645	4.46846e-09	3.06906e-08
LOC105608589	3.20656	7.00908	9.55407	42.9692	83.7984	67.1835	6.5899	64.6504	-3.30737	4.9353e-09	3.3716e-08
LOC105611327	76.9573	72.4271	52.9148	4.15831	0	0	67.4331	1.3861	5.62036	5.12315e-09	3.49682e-08
LOC106991904	0	0	0	20.7915	47.8848	32.3476	0	33.6746	-7.99625	5.14903e-09	3.51241e-08
-	54.5114	66.1968	30.867	0	0	0	50.5251	0	7.64548	5.54901e-09	3.77191e-08
-	1.28262	3.11515	5.1445	24.9499	50.8776	105.752	3.18075	60.5264	-4.27152	5.77083e-09	3.91224e-08
LOC105605155	76.316	49.0635	62.4689	5.54441	4.4892	0	62.6161	3.34454	4.27508	5.87291e-09	3.97677e-08
-	76.9573	54.515	60.2641	5.54441	7.482	4.97655	63.9122	6.00099	3.42568	6.38192e-09	4.29368e-08
MND1	3.20656	3.11515	9.55407	65.1469	53.8704	51.0097	5.29192	56.6756	-3.42669	8.09712e-09	5.36464e-08
LOC105605854	50.6636	87.2241	75.6976	8.31662	8.9784	6.22069	71.1951	7.83857	3.19066	8.24075e-09	5.45509e-08
-	550.886	229.742	562.22	0	13.4676	9.9531	447.616	7.8069	5.84428	9.95025e-09	6.51374e-08
LOC106991941	67.3377	86.4453	65.4086	1.3861	0	0	73.0639	0.462034	7.2154	1.00497e-08	6.5714e-08
LOC105602404	60.2832	48.2848	30.1321	0	0	0	46.2333	0	7.51873	1.12336e-08	7.29995e-08
-	61.5659	65.4181	55.1196	2.77221	5.9856	7.46483	60.7012	5.40755	3.47815	1.20761e-08	7.81655e-08
LOC105604284	1.28262	1.55757	2.20478	24.9499	86.7912	28.6152	1.68166	46.7854	-4.8014	1.23507e-08	7.98084e-08
S100A9	3.20656	3.89393	1.46986	745.724	29.928	267.49	2.85678	347.714	-6.928	1.39224e-08	8.92638e-08
LOC101108321	0	0	0	91.4828	4.4892	34.8359	0	43.6026	-8.37226	1.7635e-08	1.1121e-07
ATP6V1B1	0	3.11515	8.08421	149.699	32.9208	58.4745	3.73312	80.3648	-4.45041	1.79397e-08	1.12916e-07
-	48.0983	28.8151	49.9751	0	0	0	42.2962	0	7.39038	2.23511e-08	1.39086e-07
-	48.0983	49.8423	58.7943	4.15831	2.9928	2.48828	52.245	3.21313	4.02991	2.51816e-08	1.55274e-07
LOC101115820	148.143	33.4878	85.2517	5.54441	10.4748	6.22069	88.9608	7.4133	3.59851	2.80922e-08	1.72253e-07
LOC105612514	68.6203	66.1968	51.445	0	8.9784	4.97655	62.0874	4.65165	3.75783	3.02649e-08	1.8474e-07
-	75.6747	52.1787	63.9388	9.70272	5.9856	7.46483	63.9307	7.71772	3.04787	3.78291e-08	2.28014e-07
LOC105615721	87.2183	46.7272	58.0593	0	1.4964	0	64.0016	0.4988	7.02686	4.12928e-08	2.4766e-07
GNLY	3.20656	2.33636	0	60.9885	26.9352	37.3241	1.84764	41.7493	-4.47525	4.84349e-08	2.87281e-07
LOC105603471	48.0983	42.0545	61.734	2.77221	1.4964	3.73241	50.6289	2.66701	4.21953	4.91059e-08	2.91036e-07
LOC105602951	61.5659	44.3908	46.3005	4.15831	2.9928	1.24414	50.7524	2.79842	4.20595	5.07081e-08	2.99607e-07
LOC101105022	0.641311	0	0	1279.37	17.9568	659.393	0.21377	652.241	-11.3121	5.0814e-08	3.00079e-07
LOC105613198	55.7941	56.8514	47.7703	6.93052	2.9928	1.24414	53.4719	3.72248	3.86392	5.15611e-08	3.04413e-07
LOC105611988	74.3921	49.0635	39.6861	1.3861	1.4964	1.24414	54.3806	1.37555	5.31368	6.05704e-08	3.5587e-07
EGR4	3.20656	5.4515	2.93971	74.8496	25.4388	44.789	3.86592	48.3591	-3.65692	6.14365e-08	3.60408e-07
LOC105604834	61.5659	52.1787	72.7579	11.0888	1.4964	1.24414	62.1675	4.60979	3.76185	7.60212e-08	4.39257e-07
LOC105611959	62.8485	66.1968	41.156	6.93052	0	0	56.7338	2.31017	4.63053	7.61677e-08	4.39993e-07
LOC106991351	30.7829	45.9484	30.867	0	0	0	35.8661	0	7.15019	8.86179e-08	5.07083e-07
LOC105602782	78.2399	59.1878	38.2163	0	1.4964	0	58.548	0.4988	6.89777	9.19908e-08	5.24819e-07
LOC105613508	67.979	54.515	40.421	6.93052	0	1.24414	54.305	2.72488	4.31258	9.47166e-08	5.38902e-07
LOC443162	0.641311	1.55757	2.20478	77.6218	7.482	60.9628	1.46789	48.6888	-5.07656	9.86854e-08	5.601e-07
SNCG	35.9134	58.409	72.023	368.703	1429.06	398.124	55.4485	731.963	-3.72309	9.92223e-08	5.62732e-07
EIF5A2	117.36	52.1787	58.0593	13.861	5.9856	6.22069	75.866	8.68911	3.13011	1.06251e-07	6.00818e-07
LOC106991596	131.469	98.9059	32.3368	9.70272	10.4748	1.24414	87.5705	7.14055	3.6446	1.10593e-07	6.23534e-07
LOC105612920	85.9357	57.6302	51.445	6.93052	11.9712	2.48828	65.0036	7.13	3.22243	1.27781e-07	7.13979e-07
LOC101103771	7.69573	1.55757	3.67464	1279.37	38.9064	325.964	4.30932	548.081	-6.9824	1.28403e-07	7.17285e-07
CDC6	2.56524	0.778786	2.93971	30.4943	44.892	31.1035	2.09458	35.4966	-4.06198	1.31826e-07	7.34443e-07
-	23.0872	51.3999	32.3368	0	0	0	35.608	0	7.13878	1.36587e-07	7.59866e-07
LOC101118398	70.5442	43.612	47.0354	6.93052	0	3.73241	53.7306	3.55431	3.89444	1.47011e-07	8.14714e-07
LOC105607297	57.0767	40.4969	51.445	2.77221	5.9856	3.73241	49.6728	4.16341	3.59209	1.63295e-07	8.9955e-07
FAM216B	3.20656	11.6818	9.55407	63.7607	37.41	111.972	8.14747	71.0477	-3.14396	1.6657e-07	9.16276e-07
PPP1R14A	6.41311	2.33636	3.67464	73.4635	22.446	53.4979	4.14137	49.8025	-3.57073	1.79219e-07	9.82105e-07
-	38.4787	58.409	47.0354	2.77221	4.4892	3.73241	47.9743	3.66461	3.71393	1.96596e-07	1.07096e-06
LOC105609997	89.1422	49.0635	37.4813	6.93052	4.4892	0	58.5624	3.80657	3.98188	2.09056e-07	1.13454e-06
LOC105616771	76.9573	64.6393	24.9876	4.15831	2.9928	3.73241	55.528	3.62784	3.93215	2.10116e-07	1.13976e-06
LOC105616516	59.6419	38.1605	44.8306	2.77221	1.4964	4.97655	47.5444	3.08172	3.91386	2.22759e-07	1.20381e-06
ADIPOQ	0	0	0	88.7106	8.9784	6.22069	0	34.6366	-8.03823	2.59569e-07	1.38808e-06
-	30.1416	65.4181	52.9148	4.15831	2.9928	0	49.4915	2.3837	4.41945	2.67758e-07	1.42988e-06
ZNF891	78.2399	41.2757	94.8057	5.54441	1.4964	13.6855	71.4405	6.90878	3.33261	2.817e-07	1.50121e-06
CD79A	7.05442	7.00908	3.67464	63.7607	37.41	42.3007	5.91271	47.8238	-3.01319	2.93997e-07	1.56276e-06
SLC10A1	63.4898	35.0454	61.734	5.54441	5.9856	0	53.423	3.84334	3.84498	3.03042e-07	1.60639e-06
AURKA	4.48918	11.6818	3.67464	80.394	44.892	43.5448	6.6152	56.2769	-3.10349	3.05533e-07	1.61848e-06
LOC105608665	53.2288	57.6302	39.6861	6.93052	2.9928	0	50.1817	3.30777	3.95642	3.0815e-07	1.63197e-06
LOC105602370	85.9357	112.924	42.6258	2.77221	16.4604	1.24414	80.4952	6.82558	3.60312	3.12192e-07	1.65034e-06
EFCAB13	38.4787	53.7363	50.71	0	0	1.24414	47.6417	0.414713	6.59803	3.45592e-07	1.81235e-06
FAM69C	4.48918	3.11515	9.55407	48.5136	29.928	87.0897	5.71946	55.1771	-3.27512	3.66542e-07	1.91611e-06
LOC105616880	82.0878	40.4969	59.5292	4.15831	4.4892	11.1972	60.7046	6.61492	3.17446	3.85929e-07	2.01107e-06
TTC9B	2.56524	1.55757	1.46986	26.336	28.4316	39.8124	1.86422	31.5267	-4.06488	3.92226e-07	2.04204e-06
LOC106991595	62.8485	49.0635	45.5655	1.3861	4.4892	8.70897	52.4925	4.86142	3.40709	3.94165e-07	2.05167e-06
TRIM10	3.84787	0.778786	0	113.66	17.9568	22.3945	1.54222	51.3373	-5.00309	4.0698e-07	2.11408e-06
SFRP5	0.641311	3.11515	15.4335	180.193	85.2948	31.1035	6.39665	98.8639	-3.95887	4.56218e-07	2.34919e-06
-	28.2177	24.1424	36.0115	0	0	0	29.4572	0	6.86752	4.75265e-07	2.44454e-06
LOC106991833	52.5875	35.8242	43.3608	4.15831	0	2.48828	43.9241	2.21553	4.27941	4.80812e-07	2.47141e-06
LOC106991723	75.0334	52.9575	23.5177	0	0	1.24414	50.5029	0.414713	6.68475	5.04135e-07	2.58438e-06
GTSE1	3.84787	5.4515	4.40957	52.6719	23.9424	51.0097	4.56965	42.5413	-3.2292	5.29212e-07	2.70451e-06
VAX1	0	0	0	51.2858	5.9856	18.6621	0	25.3112	-7.58763	5.5431e-07	2.82275e-06
LOC105613013	35.9134	33.4878	19.1081	0	0	0	29.5031	0	6.87022	5.78559e-07	2.94039e-06
LOC105602693	84.0117	40.4969	25.7225	0	0	1.24414	50.077	0.414713	6.67341	5.97072e-07	3.02514e-06
WISP1	3.20656	1.55757	7.34928	70.6913	46.3884	23.6386	4.0378	46.9061	-3.53411	7.42433e-07	3.71507e-06
ANKAR	29.5003	54.515	51.445	1.3861	4.4892	3.73241	45.1534	3.20257	3.81946	7.42855e-07	3.71637e-06
VMO1	20.522	81.7726	57.3244	1807.48	275.338	1069.96	53.2063	1050.92	-4.30532	7.51029e-07	3.75482e-06
LOC105604647	122.49	120.712	19.1081	4.15831	7.482	11.1972	87.4368	7.61252	3.51233	7.6622e-07	3.82744e-06
NDC80	3.84787	5.4515	2.93971	49.8997	53.8704	21.1503	4.07969	41.6402	-3.35262	8.12414e-07	4.03981e-06
CENPA	3.20656	4.67272	5.1445	63.7607	25.4388	36.08	4.34126	41.7599	-3.27524	8.61165e-07	4.26199e-06
LOC101109936	53.2288	28.8151	12.4938	0	0	0	31.5126	0	6.96692	8.75554e-07	4.3267e-06
EHF	3.20656	3.89393	10.289	120.591	29.928	36.08	5.79649	62.1997	-3.42952	1.05335e-06	5.14133e-06
LOC105613374	10.261	3.89393	3.67464	34.6526	59.856	51.0097	5.94318	48.5061	-3.00708	1.0729e-06	5.2279e-06
LOC105602265	46.8157	33.4878	43.3608	4.15831	1.4964	0	41.2214	1.8849	4.48722	1.07653e-06	5.24389e-06
LOC105605915	50.6636	67.7544	49.2402	12.4749	1.4964	2.48828	55.8861	5.48654	3.34882	1.09052e-06	5.30593e-06
-	10.9023	2.33636	5.1445	34.6526	112.23	38.5683	6.12771	61.817	-3.31033	1.18245e-06	5.7182e-06
KRT17	1.28262	4.67272	8.08421	189.896	7.482	59.7186	4.67985	85.6989	-4.20725	1.18806e-06	5.74414e-06
LOC101118574	38.4787	38.9393	42.6258	4.15831	0	2.48828	40.0146	2.21553	4.14373	1.28865e-06	6.20185e-06
-	70.5442	26.4787	50.71	6.93052	0	1.24414	49.2443	2.72488	4.17276	1.32268e-06	6.35364e-06
-	0	0.778786	0.734928	123.363	1.4964	31.1035	0.504572	51.9877	-6.7449	1.43715e-06	6.86204e-06
LOC105604270	69.2616	73.9847	28.6622	2.77221	4.4892	9.9531	57.3028	5.73817	3.29621	1.4735e-06	7.02686e-06
AREG	0.641311	3.11515	2.93971	24.9499	19.4532	64.6952	2.23206	36.3661	-4.06081	1.55072e-06	7.37987e-06
FOXM1	3.84787	4.67272	0	40.197	31.4244	39.8124	2.84019	37.1446	-3.70778	1.64428e-06	7.80253e-06
MPO	3.84787	0.778786	2.20478	590.48	8.9784	257.537	2.27715	285.665	-6.95937	1.68429e-06	7.9809e-06
LOC105605938	53.2288	48.2848	31.6019	2.77221	0	0	44.3718	0.924069	5.60191	1.70845e-06	8.0821e-06
LOC105604204	39.12	52.9575	41.156	5.54441	5.9856	1.24414	44.4111	4.25805	3.41466	1.71304e-06	8.10156e-06
-	49.3809	50.6211	28.6622	5.54441	2.9928	2.48828	42.8881	3.67516	3.55164	1.97117e-06	9.2377e-06
TROAP	5.7718	3.89393	2.20478	47.1275	29.928	33.5917	3.95684	36.8824	-3.20732	1.97853e-06	9.26841e-06
-	49.3809	27.2575	55.8545	4.15831	4.4892	3.73241	44.1643	4.12664	3.42636	2.09812e-06	9.78882e-06
PF4	10.261	8.56665	5.87943	237.024	17.9568	39.8124	8.23568	98.2643	-3.57394	2.11804e-06	9.87574e-06
SELPLG	6.41311	3.89393	16.9033	144.155	26.9352	72.16	9.07013	81.0833	-3.16192	2.13199e-06	9.93479e-06
SLC22A1	0	0.778786	0	49.8997	8.9784	27.371	0.259595	28.7497	-6.81055	2.18217e-06	1.01495e-05
KRT4	0	0.778786	2.93971	343.754	16.4604	235.142	1.2395	198.452	-7.33867	2.27978e-06	1.05764e-05
LOC106991036	55.1527	41.2757	47.0354	9.70272	4.4892	2.48828	47.8213	5.56007	3.11819	2.2896e-06	1.06198e-05
CACNB4	64.7724	38.1605	41.156	8.31662	1.4964	4.97655	48.0296	4.92986	3.27132	2.29157e-06	1.06247e-05
LOC101107504	1.92393	3.89393	11.7589	38.8109	49.3812	64.6952	5.85891	50.9624	-3.13368	2.31055e-06	1.06976e-05
FCN1	0	0.778786	0	67.9191	2.9928	33.5917	0.259595	34.8345	-7.08733	2.38775e-06	1.10174e-05
LOC105603495	31.4242	43.612	41.156	0	2.9928	3.73241	38.7308	2.24174	4.09299	2.38906e-06	1.10212e-05
-	35.2721	51.3999	42.6258	4.15831	2.9928	6.22069	43.0993	4.45727	3.25176	2.44148e-06	1.12446e-05
CD177	0	0	0	41.5831	2.9928	21.1503	0	21.9087	-7.3805	2.67092e-06	1.22285e-05
LOC105615758	30.1416	33.4878	46.3005	0	0	1.24414	36.6433	0.414713	6.21986	2.73849e-06	1.25105e-05
LOC105607552	32.7069	46.7272	32.3368	2.77221	2.9928	1.24414	37.257	2.33638	4.01958	2.78662e-06	1.27178e-05
FAM64A	3.20656	0.778786	0	33.2665	28.4316	24.8828	1.32845	28.8603	-4.37932	2.84523e-06	1.29647e-05
LOC105607546	50.6636	49.8423	69.8182	2.77221	14.964	2.48828	56.7747	6.7415	3.11314	3.12535e-06	1.41572e-05
LOC105608127	57.718	49.8423	41.156	11.0888	2.9928	1.24414	49.5721	5.10859	3.29272	3.17444e-06	1.43682e-05
CCKAR	1.28262	2.33636	0.734928	38.8109	43.3956	9.9531	1.4513	30.7199	-4.41248	3.19497e-06	1.44554e-05
LOC106991851	28.2177	25.6999	16.9033	0	0	0	23.607	0	6.5486	3.30449e-06	1.49217e-05
PKD1L2	53.2288	32.709	41.8909	1.3861	5.9856	4.97655	42.6096	4.11609	3.37698	3.30597e-06	1.49254e-05
LOC105607801	50.0223	46.7272	24.2526	1.3861	0	4.97655	40.334	2.12089	4.17748	3.77488e-06	1.68836e-05
LOC105616426	41.6852	36.603	30.867	2.77221	2.9928	2.48828	36.3851	2.75109	3.73183	3.85804e-06	1.72322e-05
LOC106991128	19.8806	21.0272	27.1923	0	0	0	22.7001	0	6.49101	4.1017e-06	1.82475e-05
LOC105602543	33.9895	38.1605	32.3368	1.3861	1.4964	1.24414	34.829	1.37555	4.66855	4.10199e-06	1.82475e-05
-	3.20656	6.23029	5.1445	66.533	16.4604	49.7655	4.86045	44.253	-3.20083	4.15397e-06	1.84645e-05
WFIKKN2	3.20656	3.89393	9.55407	42.9692	28.4316	60.9628	5.55152	44.1212	-3.00135	4.255e-06	1.88953e-05
CDR1	33.3482	49.0635	33.8067	0	4.4892	3.73241	38.7395	2.74054	3.82278	4.37698e-06	1.93996e-05
BATF3	8.33704	3.11515	8.81914	74.8496	17.9568	78.3807	6.75711	57.0624	-3.0731	4.50834e-06	1.99358e-05
LOC105603685	68.6203	45.9484	36.7464	9.70272	0	0	50.4384	3.23424	3.97308	4.58389e-06	2.02389e-05
LOC106991039	59.0006	48.2848	25.7225	5.54441	0	4.97655	44.336	3.50699	3.62658	4.64663e-06	2.04806e-05
SHCBP1L	33.9895	37.3817	29.3971	0	0	1.24414	33.5895	0.414713	6.09474	4.6885e-06	2.06612e-05
-	1.28262	2.33636	9.55407	85.9384	56.8632	17.4179	4.39102	53.4065	-3.61223	4.73295e-06	2.08451e-05
LOC101102587	0	0	0	42.9692	7.482	7.46483	0	19.3053	-7.19497	5.65168e-06	2.46278e-05
LOC105614969	41.0439	35.8242	23.5177	0	0	1.24414	33.4619	0.414713	6.09029	5.68578e-06	2.47576e-05
TFF3	4.48918	11.6818	22.7828	422.761	56.8632	316.011	12.9846	265.212	-4.35568	5.74267e-06	2.49959e-05
-	61.5659	38.1605	38.2163	8.31662	0	4.97655	45.9809	4.43106	3.35289	5.91696e-06	2.57011e-05
MESP2	2.56524	0.778786	2.20478	377.02	130.187	6.22069	1.84961	171.143	-6.52215	5.92493e-06	2.57261e-05
C11H17orf105	37.196	34.2666	36.7464	1.3861	0	4.97655	36.0697	2.12089	4.0143	6.3269e-06	2.73272e-05
CCER2	84.0117	34.2666	36.0115	2007.08	2148.83	130.634	51.4299	1428.85	-4.79518	6.39056e-06	2.75867e-05
CCL26	1.92393	11.6818	2.20478	41.5831	74.82	33.5917	5.27017	49.9983	-3.26721	6.51368e-06	2.80866e-05
LOC106991127	32.7069	49.8423	29.3971	0	2.9928	0	37.3154	0.9976	5.33328	7.44908e-06	3.18223e-05
TMEM176B	35.9134	34.2666	87.4565	978.589	245.41	338.406	52.5455	520.801	-3.30945	7.47128e-06	3.18816e-05
LOC105611599	21.8046	20.2484	20.578	0	0	0	20.877	0	6.3709	7.52009e-06	3.20721e-05
KRT7	92.3488	123.048	97.0105	1591.25	281.323	707.915	104.136	860.161	-3.04647	8.54036e-06	3.60762e-05
LOC105615202	55.1527	61.5241	48.5053	15.2471	2.9928	1.24414	55.0607	6.49469	3.09398	8.70755e-06	3.67487e-05
LOC101117785	30.7829	23.3636	117.589	1140.76	309.755	1204.33	57.245	884.948	-3.95074	9.05492e-06	3.80753e-05
LOC105607935	50.0223	28.8151	30.867	2.77221	4.4892	2.48828	36.5681	3.24989	3.51156	9.2215e-06	3.87333e-05
LOC106992013	21.8046	40.4969	31.6019	0	1.4964	0	31.3011	0.4988	5.99121	9.48726e-06	3.97626e-05
KIF2C	5.7718	8.56665	3.67464	90.0967	32.9208	23.6386	6.00436	48.8854	-3.02861	9.60329e-06	4.02197e-05
LOC101114082	0.641311	4.67272	1.46986	52.6719	10.4748	41.0566	2.2613	34.7344	-3.979	9.69599e-06	4.05751e-05
-	42.3265	38.9393	21.3129	0	2.9928	1.24414	34.1929	1.41231	4.63478	1.00729e-05	4.20182e-05
-	48.0983	38.9393	37.4813	1.3861	2.9928	8.70897	41.5063	4.36262	3.21441	1.0112e-05	4.21663e-05
TMPRSS13	1.28262	2.33636	2.20478	85.9384	7.482	18.6621	1.94126	37.3608	-4.2791	1.08082e-05	4.48906e-05
FGF21	0	0	0	11.0888	23.9424	9.9531	0	14.9948	-6.82641	1.14059e-05	4.73049e-05
LOC105616503	214.839	134.73	141.106	12.4749	1.4964	0	163.558	4.65711	5.14094	1.18146e-05	4.8868e-05
LOC105607674	39.7613	28.0363	22.0478	1.3861	0	0	29.9485	0.462034	5.93098	1.26723e-05	5.21163e-05
LOC101114285	2.56524	3.11515	11.0239	77.6218	14.964	68.4276	5.5681	53.6711	-3.27811	1.27394e-05	5.2383e-05
SC5	0	0.778786	2.20478	857.998	5.9856	150.541	0.994524	338.175	-8.42341	1.28621e-05	5.28496e-05
HBM	0	0.778786	2.20478	532.264	8.9784	97.0428	0.994524	212.762	-7.75697	1.44703e-05	5.90055e-05
LOC101113077	0	0.778786	0	12.4749	1.4964	80.869	0.259595	31.6134	-6.95096	1.46472e-05	5.96706e-05
-	173.154	321.639	216.804	4187.42	861.927	1225.48	237.199	2091.61	-3.14066	1.51498e-05	6.15583e-05
-	0.641311	0	0.734928	41.5831	11.9712	17.4179	0.458746	23.6574	-5.64834	1.64046e-05	6.62944e-05
LKAAEAR1	41.0439	28.8151	38.9512	5.54441	2.9928	3.73241	36.2701	4.08988	3.1467	1.64472e-05	6.64315e-05
LOC101116529	83.3704	553.717	230.033	4213.75	1753.78	2821.71	289.04	2929.75	-3.34186	1.6554e-05	6.68396e-05
SLC6A13	0.641311	0	2.93971	41.5831	8.9784	32.3476	1.19367	27.6364	-4.53784	1.73449e-05	6.98371e-05
RHAG	0	0	0	38.8109	1.4964	14.9297	0	18.4123	-7.12912	1.7607e-05	7.08432e-05
-	5.13049	0.778786	1.46986	85.9384	1.4964	68.4276	2.45971	51.9541	-4.37412	1.76105e-05	7.08447e-05
-	3.20656	4.67272	2.93971	37.4248	23.9424	27.371	3.60633	29.5794	-3.04359	1.84909e-05	7.41147e-05
ENAM	30.7829	14.7969	13.2287	0	0	0	19.6029	0	6.2825	1.94971e-05	7.78632e-05
BMPER	2.56524	0.778786	6.61435	33.2665	35.9136	27.371	3.31946	32.1837	-3.27297	2.03778e-05	8.10716e-05
LOC105613322	42.3265	36.603	35.2766	8.31662	2.9928	2.48828	38.0687	4.59923	3.05641	2.08103e-05	8.26209e-05
-	19.2393	22.5848	13.9636	0	0	0	18.5959	0	6.20342	2.10204e-05	8.33974e-05
CATHL1B	4.48918	1.55757	0.734928	421.375	5.9856	145.564	2.26056	190.975	-6.38808	2.16625e-05	8.57237e-05
LOC105604976	25.6524	25.6999	40.421	0	1.4964	2.48828	30.5911	1.32823	4.49301	2.21267e-05	8.74103e-05
LOC105611957	42.9678	19.4697	32.3368	0	2.9928	1.24414	31.5914	1.41231	4.52152	2.22676e-05	8.79219e-05
-	0.641311	0.778786	0	15.2471	43.3956	11.1972	0.473366	23.28	-5.60878	2.31334e-05	9.10128e-05
LOC105615490	25.6524	17.9121	12.4938	0	0	0	18.6861	0	6.21234	2.32104e-05	9.13003e-05
LTF	5.7718	0	2.93971	548.897	26.9352	176.668	2.90384	250.833	-6.42012	2.3265e-05	9.14684e-05
LOC105610742	30.7829	35.8242	24.9876	1.3861	1.4964	0	30.5316	0.960835	5.05247	2.54598e-05	9.95876e-05
LOC101107770	0.641311	0	0	23.5638	13.4676	17.4179	0.21377	18.1498	-6.14577	2.55148e-05	9.97859e-05
LOC101114535	0	0.778786	8.81914	59.6024	16.4604	70.9159	3.19931	48.9929	-3.95249	2.56999e-05	0.000100407
CXCL8	0.641311	0.778786	1.46986	99.7994	2.9928	7.46483	0.963318	36.7524	-5.26184	2.57082e-05	0.000100423
ACTG2	3.84787	10.1242	3.67464	195.441	32.9208	6.22069	5.88224	78.194	-3.74026	2.65969e-05	0.000103683
ANKLE1	1.28262	2.33636	3.67464	62.3746	7.482	29.8593	2.43121	33.2387	-3.78767	2.73676e-05	0.000106454
EGR3	2.56524	7.78786	13.9636	153.857	31.4244	27.371	8.10558	70.8843	-3.13665	2.76745e-05	0.000107502
PGLYRP1	8.97835	0.778786	0.734928	751.268	16.4604	291.128	3.49736	352.952	-6.64424	2.84093e-05	0.000110171
SYTL5	25.0111	45.1696	33.0718	0	5.9856	2.48828	34.4175	2.82463	3.6352	2.94934e-05	0.000114183
LOC106990872	31.4242	18.6909	8.08421	0	0	0	19.3998	0	6.26706	2.97929e-05	0.000115207
LOC105602357	16.6741	24.9212	12.4938	0	0	0	18.0297	0	6.15801	3.00035e-05	0.000115982
LOC101105274	1.28262	0	0	454.642	4.4892	184.132	0.427541	214.421	-8.90947	3.05414e-05	0.000117904
LOC105603859	81.4465	91.8968	38.9512	20.7915	1.4964	1.24414	70.7648	7.84403	3.1779	3.10837e-05	0.000119876
NFE2	5.13049	10.1242	5.1445	130.294	7.482	57.2303	6.79974	65.002	-3.26491	3.11621e-05	0.000120159
LOC105605187	0	3.89393	1.46986	18.0193	40.4028	22.3945	1.78793	26.9389	-3.95999	3.16932e-05	0.000122023
NGEF	1.28262	0	5.87943	38.8109	22.446	31.1035	2.38735	30.7868	-3.69079	3.45308e-05	0.000132131
LOC106990454	30.1416	30.3727	26.4574	1.3861	2.9928	2.48828	28.9906	2.28906	3.66741	3.64688e-05	0.000138999
LOC101119933	1.92393	0	0	618.202	5.9856	287.396	0.641311	303.861	-8.84469	3.74833e-05	0.000142553
MPZ	2.56524	3.11515	3.67464	65.1469	5.9856	750.215	3.11834	273.783	-6.45784	3.79481e-05	0.000144178
LOC101111846	44.2505	39.7181	20.578	4.15831	1.4964	4.97655	34.8489	3.54375	3.27376	4.01815e-05	0.000152111
ELANE	5.13049	3.11515	4.40957	52.6719	5.9856	70.9159	4.2184	43.1911	-3.3544	4.09027e-05	0.000154791
IGFBPL1	1.92393	1.55757	1.46986	23.5638	14.964	26.1269	1.65045	21.5516	-3.70341	4.15544e-05	0.000157025
RGS13	22.4459	18.6909	34.5416	1.3861	0	0	25.2261	0.462034	5.68188	4.17419e-05	0.000157656
LOC105616505	35.9134	31.9302	26.4574	5.54441	0	0	31.4337	1.84814	4.10018	4.39228e-05	0.000165189
LOC101112345	0.641311	0	1.46986	20.7915	5.9856	41.0566	0.703722	22.6112	-4.99884	4.66257e-05	0.000174386
SMC1B	50.6636	21.806	27.1923	2.77221	4.4892	2.48828	33.2206	3.24989	3.37289	4.66674e-05	0.000174486
TUBB4A	1.28262	7.78786	1.46986	27.7221	100.259	9.9531	3.51345	45.978	-3.72779	4.79705e-05	0.000179012
LOC105607590	25.6524	10.903	14.6986	0	0	0	17.0847	0	6.08417	5.00049e-05	0.000186239
HDC	2.56524	0	0	22.1777	31.4244	13.6855	0.855081	22.4292	-4.61589	5.03193e-05	0.000187289
LOC101113516	3.20656	0	0.734928	616.816	8.9784	83.3572	1.31383	236.384	-7.46762	5.31635e-05	0.000197143
SPDYA	48.0983	34.2666	13.9636	4.15831	0	1.24414	32.1095	1.80082	4.14467	5.34226e-05	0.000198009
LOC101102326	21.1633	17.1333	11.0239	0	0	0	16.4402	0	6.0271	5.67817e-05	0.000209414
LOC105606047	35.2721	31.1515	19.8431	1.3861	0	3.73241	28.7555	1.70617	4.00776	5.72759e-05	0.000211068
LOC105615742	26.9351	23.3636	5.1445	0	0	0	18.4811	0	6.19588	5.76425e-05	0.000212283
LOC106990871	37.196	28.0363	30.1321	2.77221	5.9856	0	31.7881	2.91927	3.50377	5.78595e-05	0.000212946
-	15.3915	16.3545	16.1684	0	0	0	15.9715	0	5.984	5.84078e-05	0.000214758
LOC106990932	21.8046	31.1515	32.3368	4.15831	0	1.24414	28.431	1.80082	3.96559	6.00069e-05	0.000220264
FAM83D	1.92393	0	0.734928	34.6526	7.482	23.6386	0.886287	21.9244	-4.57023	6.00509e-05	0.000220378
GJB6	0	0	0.734928	19.4054	7.482	23.6386	0.244976	16.842	-6.04183	6.04948e-05	0.000221936
LOC105614752	19.2393	14.0182	14.6986	0	0	0	15.9853	0	5.98664	6.09902e-05	0.000223611
TRNAC-ACA	37.196	29.5939	19.8431	4.15831	0	1.24414	28.8777	1.80082	3.99074	6.18704e-05	0.00022655
LOC101107852	3.84787	2.33636	1.46986	24.9499	13.4676	39.8124	2.55136	26.0766	-3.34355	6.60698e-05	0.000240665
LOC105610544	21.1633	31.1515	27.9273	0	2.9928	1.24414	26.7473	1.41231	4.27745	6.71862e-05	0.000244153
S100A8	8.33704	2.33636	0	627.905	34.4172	200.306	3.5578	287.543	-6.32681	6.92763e-05	0.000251035
AGRP	5.7718	2.33636	1.46986	2.77221	104.748	34.8359	3.19267	47.452	-3.87382	6.95356e-05	0.000251777
LOC105616534	28.2177	25.6999	15.4335	1.3861	0	0	23.117	0.462034	5.55665	7.28813e-05	0.000263106
LOC105615397	32.7069	45.9484	17.6383	5.54441	1.4964	0	32.0978	2.34694	3.79776	7.56605e-05	0.000272158
LOC106991416	26.2938	35.0454	19.1081	1.3861	2.9928	1.24414	26.8158	1.87435	3.86593	7.92804e-05	0.000284469
-	0	1.55757	4.40957	59.6024	8.9784	24.8828	1.98905	31.1545	-3.99476	7.94676e-05	0.000285007
LOC105602718	23.0872	16.3545	8.81914	0	0	0	16.0869	0	5.99635	7.99294e-05	0.000286574
GATA2	19.8806	28.0363	41.8909	4.15831	2.9928	1.24414	29.936	2.79842	3.4379	8.12353e-05	0.000290974
LOC105603858	20.522	19.4697	8.08421	0	0	0	16.0253	0	5.9898	8.43265e-05	0.000301121
-	55.1527	38.9393	15.4335	6.93052	0	0	36.5085	2.31017	3.9926	8.56466e-05	0.000305598
FOSL1	0.641311	2.33636	4.40957	33.2665	10.4748	38.5683	2.46241	27.4365	-3.50265	8.82347e-05	0.000314104
LOC105613298	42.3265	24.1424	36.7464	0	0	7.46483	34.4051	2.48828	3.71088	8.99534e-05	0.000319728
LOC105614911	25.6524	12.4606	9.55407	0	0	0	15.889	0	5.9796	9.38481e-05	0.000332392
LOC101121298	0	0	0	23.5638	2.9928	11.1972	0	12.5846	-6.58056	9.53182e-05	0.000337391
BCAN	0	1.55757	7.34928	49.8997	40.4028	16.1738	2.96895	35.4921	-3.59454	9.84515e-05	0.000347734
-	1.28262	3.89393	2.20478	44.3553	11.9712	21.1503	2.46045	25.8256	-3.41413	9.90861e-05	0.000349761
LOC105601997	0	0.778786	0	33.2665	2.9928	17.4179	0.259595	17.8924	-6.12696	9.96759e-05	0.000351574
SCN1A	21.8046	43.612	30.1321	1.3861	4.4892	4.97655	31.8496	3.61729	3.12955	0.000100873	0.000355293
-	2.56524	41.2757	13.2287	327.12	169.093	302.326	19.0232	266.18	-3.81147	0.00010092	0.000355364
SOX10	0.641311	0.778786	1.46986	30.4943	10.4748	14.9297	0.963318	18.6329	-4.28501	0.000102469	0.000360597
LOC101103862	0.641311	0	0	34.6526	1.4964	21.1503	0.21377	19.0998	-6.22161	0.000105838	0.000371374
-	25.6524	31.1515	19.1081	1.3861	1.4964	0	25.304	0.960835	4.77938	0.000105889	0.000371499
KLF1	2.56524	0.778786	0	65.1469	5.9856	11.1972	1.11468	27.4432	-4.57754	0.000110438	0.000385872
LOC105602511	20.522	14.0182	10.289	0	0	0	14.943	0	5.88992	0.000113616	0.000396313
PVALB	1.92393	3.11515	0.734928	34.6526	22.446	11.1972	1.92467	22.7653	-3.56924	0.000115206	0.000401495
LOC105614972	22.4459	13.2394	9.55407	0	0	0	15.0798	0	5.9036	0.000118347	0.000411198
LOC106990886	27.5764	41.2757	19.8431	5.54441	0	0	29.565	1.84814	4.00956	0.00011955	0.000414815
LOC105602138	26.2938	24.9212	21.3129	1.3861	0	1.24414	24.1759	0.876747	4.7389	0.000129534	0.000446699
LOC105614882	42.3265	42.0545	8.81914	4.15831	0	0	31.0667	1.3861	4.49795	0.000131608	0.000452971
DLGAP5	3.20656	5.4515	2.93971	60.9885	19.4532	14.9297	3.86592	31.7905	-3.04637	0.000134535	0.00046194
-	25.0111	20.2484	29.3971	0	0	2.48828	24.8856	0.829425	4.79677	0.00013743	0.000470829
CSMD1	16.0328	47.506	38.9512	2.77221	2.9928	6.22069	34.1633	3.99523	3.07255	0.000137808	0.000471983
LOC101120311	25.0111	22.5848	14.6986	0	0	1.24414	20.7648	0.414713	5.40183	0.000138551	0.000474247
GRM4	5.7718	4.67272	0	24.9499	16.4604	67.1835	3.48151	36.1979	-3.37285	0.000139615	0.000477391
LOC106991119	13.4675	21.806	8.81914	0	0	0	14.6976	0	5.86301	0.00014424	0.000491674
LOC105601931	18.598	10.1242	13.9636	0	0	0	14.2286	0	5.81944	0.000151808	0.000515795
LOC106990865	21.8046	11.6818	29.3971	0	0	1.24414	20.9612	0.414713	5.4157	0.000159088	0.000538412
LOC105607438	25.6524	13.2394	6.61435	0	0	0	15.1687	0	5.91263	0.00015946	0.000539486
LOC105615810	34.6308	43.612	8.08421	0	2.9928	0	28.7757	0.9976	4.94678	0.000161133	0.000544665
LOC101118641	1.92393	3.11515	1.46986	29.1082	19.4532	14.9297	2.16964	21.1637	-3.29376	0.000162032	0.000547225
LOC105604970	21.8046	14.7969	7.34928	0	0	0	14.6503	0	5.86159	0.000162928	0.000550091
LOC101106541	0	0	0	15.2471	4.4892	12.4414	0	10.7259	-6.35115	0.000163894	0.000553268
LOC105614889	23.0872	17.1333	19.1081	1.3861	0	0	19.7762	0.462034	5.33181	0.00017142	0.00057631
LOC105611978	1.28262	3.11515	5.1445	33.2665	22.446	19.9062	3.18075	25.2062	-3.00141	0.000172344	0.000578993
LOC105606895	32.0656	21.806	40.421	6.93052	2.9928	0	31.4309	3.30777	3.27664	0.000176101	0.000590843
BAC5	11.5436	0	0.734928	1187.89	29.928	549.909	4.09284	589.242	-7.16041	0.000176895	0.00059342
LOC101106199	0	0	0	16.6332	5.9856	8.70897	0	10.4426	-6.31	0.000180608	0.000605082
WDR64	57.718	29.5939	11.7589	2.77221	0	4.97655	33.0236	2.58292	3.63246	0.000181401	0.000607384
P2RY4	16.0328	14.0182	11.0239	0	0	0	13.6916	0	5.76273	0.000181923	0.000609043
MIR125B	21.1633	13.2394	8.08421	0	0	0	14.1623	0	5.81293	0.000189303	0.00063173
EPOR	1.28262	0	1.46986	12.4749	7.482	38.5683	0.917493	19.5084	-4.3878	0.000197535	0.000656446
LOC101116610	23.0872	17.9121	16.9033	0	1.4964	0	19.3009	0.4988	5.29671	0.000199961	0.000664126
PNOC	0.641311	0	0	182.966	11.9712	4.97655	0.21377	66.6378	-8.02098	0.00020358	0.000675076
LOC106990575	32.7069	14.7969	31.6019	1.3861	4.4892	0	26.3686	1.95843	3.81979	0.000203904	0.000676051
LOC105616775	26.9351	17.9121	13.9636	1.3861	0	0	19.6036	0.462034	5.31995	0.000207184	0.000685841
-	1.92393	0.778786	5.1445	9.70272	11.9712	77.1366	2.61574	32.9368	-3.65992	0.000210638	0.000696575
LOC105604756	16.6741	10.903	12.4938	0	0	0	13.357	0	5.7278	0.000218527	0.000720078
CA12	40.4026	24.9212	24.2526	6.93052	0	0	29.8588	2.31017	3.70298	0.000218895	0.000721189
LOC105608452	19.2393	14.7969	7.34928	0	0	0	13.7952	0	5.77437	0.000224501	0.000738602
LOC105610620	19.2393	28.0363	11.7589	0	0	1.24414	19.6782	0.414713	5.32255	0.000226025	0.00074298
OSM	0	0	0.734928	41.5831	1.4964	9.9531	0.244976	17.6775	-6.10771	0.000228144	0.000749411
-	25.0111	28.0363	23.5177	4.15831	2.9928	0	25.5217	2.3837	3.46047	0.00023348	0.000765847
LOC105602477	23.7285	21.806	11.7589	0	0	1.24414	19.0978	0.414713	5.28114	0.000251432	0.000821457
SERPINF2	1.28262	0.778786	5.1445	52.6719	4.4892	32.3476	2.40197	29.8362	-3.64157	0.000254852	0.000831572
LOC105615254	7.69573	31.1515	58.7943	0	4.4892	2.48828	32.5471	2.32583	3.82162	0.000255082	0.000832204
LOC101122819	1.28262	3.89393	0	406.128	2.9928	158.006	1.72552	189.042	-6.78381	0.000258361	0.000842423
LOC105601887	27.5764	30.3727	13.2287	2.77221	0	0	23.7259	0.924069	4.69603	0.000258943	0.000844204
EXD1	27.5764	24.1424	29.3971	0	5.9856	2.48828	27.0386	2.82463	3.28793	0.0002599	0.000847203
LOC105611167	57.718	15.5757	22.7828	0	1.4964	6.22069	32.0255	2.57236	3.59337	0.000260653	0.000849418
LOC105605078	16.0328	22.5848	27.9273	1.3861	0	1.24414	22.1816	0.876747	4.61394	0.00026122	0.000851143
LOC105606966	28.2177	18.6909	41.8909	0	4.4892	4.97655	29.5998	3.15525	3.22202	0.000262084	0.000853597
-	4.48918	1.55757	0	20.7915	31.4244	17.4179	2.01558	23.2113	-3.48575	0.000264874	0.000862196
-	32.7069	22.5848	20.578	2.77221	1.4964	3.73241	25.2899	2.66701	3.22408	0.000269046	0.000874173
LOC105607691	25.0111	7.78786	8.81914	0	0	0	13.8727	0	5.78479	0.000281378	0.000910774
AZU1	3.84787	0	0	232.865	19.4532	120.681	1.28262	124.333	-6.56696	0.000288101	0.000930964
GALNT8	26.9351	14.0182	27.9273	0	2.9928	1.24414	22.9602	1.41231	4.05846	0.000288711	0.000932807
LOC106991948	28.2177	24.1424	25.7225	0	5.9856	0	26.0275	1.9952	3.78819	0.000290956	0.00093927
LOC101116754	23.0872	24.9212	16.9033	1.3861	1.4964	0	21.6372	0.960835	4.55255	0.000291994	0.000942487
-	30.1416	20.2484	8.08421	1.3861	0	0	19.4914	0.462034	5.31186	0.000312306	0.00100271
LOC101111992	0.641311	0.778786	0	13.861	22.446	8.70897	0.473366	15.0053	-4.97643	0.000315958	0.00101331
LOC105615411	21.8046	11.6818	6.61435	0	0	0	13.3669	0	5.73011	0.000318134	0.00101958
LOC105603670	21.8046	21.0272	11.7589	0	0	1.24414	18.1969	0.414713	5.2112	0.000323316	0.00103446
-	39.7613	24.1424	15.4335	0	0	4.97655	26.4457	1.65885	3.90979	0.000323434	0.00103466
LOC106991316	33.3482	18.6909	16.1684	0	2.9928	1.24414	22.7358	1.41231	4.04498	0.000323468	0.00103466
-	43.6092	10.903	16.9033	1.3861	0	1.24414	23.8052	0.876747	4.7234	0.000323991	0.0010359
-	20.522	29.5939	19.8431	1.3861	0	3.73241	23.3196	1.70617	3.70618	0.000324469	0.00103728
ARL13A	35.2721	16.3545	16.9033	0	0	2.48828	22.8433	0.829425	4.68001	0.000330124	0.0010539
DLX5	3.20656	7.00908	0	56.8302	19.4532	19.9062	3.40521	32.0632	-3.24546	0.000330771	0.00105567
LOC105607421	23.7285	13.2394	32.3368	1.3861	1.4964	2.48828	23.1016	1.79026	3.67307	0.000337423	0.00107527
LOC105603353	26.2938	18.6909	22.7828	2.77221	0	2.48828	22.5891	1.75349	3.64937	0.000346003	0.00110185
LOC105602784	23.0872	17.1333	13.2287	1.3861	0	0	17.8164	0.462034	5.18162	0.000347778	0.00110673
LOC105612273	32.0656	19.4697	36.7464	5.54441	0	4.97655	29.4272	3.50699	3.03832	0.000349446	0.00111158
-	0.641311	0	0.734928	12.4749	14.964	14.9297	0.458746	14.1229	-4.90541	0.000352257	0.0011196
LOC101117796	32.7069	21.806	13.2287	0	0	2.48828	22.5805	0.829425	4.66259	0.000353477	0.00112316
LOC105611974	25.6524	20.2484	18.3732	1.3861	0	2.48828	21.4247	1.29146	3.99257	0.000357001	0.00113373
LOC105603287	0.641311	0	0	33.2665	4.4892	6.22069	0.21377	14.6588	-5.83633	0.000357286	0.00113433
TCN1	0.641311	7.78786	0.734928	91.4828	2.9928	32.3476	3.0547	42.2744	-3.81642	0.00035908	0.00113908
LOC106990153	17.3154	31.1515	24.9876	2.77221	2.9928	2.48828	24.4848	2.75109	3.15659	0.000362869	0.00115015
EPYC	1.28262	0	2.93971	31.8804	14.964	11.1972	1.40744	19.3472	-3.76867	0.00038226	0.00120381
TPH1	17.3154	32.709	14.6986	1.3861	1.4964	0	21.5743	0.960835	4.54496	0.000382307	0.00120381
-	41.6852	19.4697	33.8067	0	8.9784	1.24414	31.6539	3.40751	3.26615	0.000384714	0.0012104
LOC105605724	26.9351	20.2484	16.9033	1.3861	0	2.48828	21.3623	1.29146	3.98901	0.000385691	0.00121298
-	1.28262	0	4.40957	74.8496	10.4748	6.22069	1.8974	30.515	-4.00399	0.000392669	0.00123307
CLDN20	11.5436	10.903	13.9636	0	0	0	12.1367	0	5.58809	0.000392978	0.00123387
LOC105608432	17.3154	10.1242	9.55407	0	0	0	12.3312	0	5.61315	0.000399113	0.00125024
LOC105602134	16.0328	24.1424	12.4938	0	0	1.24414	17.5563	0.414713	5.15769	0.000400526	0.00125432
ARR3	14.7502	22.5848	14.6986	1.3861	0	0	17.3445	0.462034	5.14	0.000401055	0.00125581
LOC105615805	21.8046	8.56665	8.08421	0	0	0	12.8185	0	5.67035	0.000405232	0.00126785
LOC105605857	14.1088	12.4606	9.55407	0	0	0	12.0412	0	5.57739	0.000424279	0.00132224
LOC105605041	12.1849	8.56665	15.4335	0	0	0	12.0617	0	5.57978	0.000444059	0.00137978
-	28.859	10.903	13.2287	0	0	1.24414	17.6636	0.414713	5.17116	0.000472902	0.00145976
LOC101121553	0.641311	0	0	26.336	1.4964	14.9297	0.21377	14.254	-5.79956	0.000473099	0.00146017
LOC105611803	14.1088	16.3545	36.0115	0	2.9928	0	22.1583	0.9976	4.56946	0.000474852	0.00146519
LOC105602539	13.4675	13.2394	8.81914	0	0	0	11.842	0	5.553	0.000480759	0.00148143
LOC105604752	16.0328	10.903	8.81914	0	0	0	11.9183	0	5.56359	0.000483086	0.00148838
LOC105612919	18.598	17.1333	3.67464	0	0	0	13.1353	0	5.70316	0.000483142	0.00148838
TRNAY-GUA	19.2393	25.6999	21.3129	2.77221	1.4964	2.48828	22.0841	2.25229	3.28083	0.000485062	0.00149369
-	35.2721	25.6999	16.9033	5.54441	0	2.48828	25.9585	2.67756	3.25986	0.000486408	0.00149764
CABP2	1.28262	3.11515	2.93971	24.9499	16.4604	17.4179	2.44583	19.6094	-3.02087	0.000487829	0.00150181
LOC106991877	6.41311	87.2241	21.3129	694.438	228.949	472.772	38.3167	465.386	-3.60463	0.000490034	0.0015082
TNNI2	1.28262	2.33636	0.734928	15.2471	10.4748	24.8828	1.4513	16.8682	-3.55738	0.000497315	0.00152999
ICAM5	1.92393	0.778786	2.93971	18.0193	26.9352	11.1972	1.88081	18.7173	-3.30105	0.000507303	0.00155822
LOC105607600	7.05442	10.903	18.3732	0	0	0	12.1102	0	5.58338	0.000513985	0.00157685
LOC106991520	24.3698	24.1424	18.3732	0	4.4892	1.24414	22.2951	1.91111	3.58944	0.000517669	0.00158689
LOC106991779	24.3698	22.5848	32.3368	2.77221	0	6.22069	26.4305	2.99763	3.08864	0.000523922	0.00160456
LOC105603522	23.7285	12.4606	27.1923	2.77221	0	1.24414	21.1271	1.33878	3.95894	0.000526524	0.00161103
-	7.05442	21.0272	8.81914	0	0	0	12.3003	0	5.60437	0.000536027	0.00163772
LOC101103242	25.6524	21.0272	14.6986	0	0	2.48828	20.4594	0.829425	4.51943	0.000538685	0.00164453
SST	0	3.89393	1.46986	9.70272	47.8848	12.4414	1.78793	23.343	-3.74114	0.000545597	0.00166431
LOC105606385	10.261	19.4697	6.61435	0	0	0	12.115	0	5.58373	0.000551	0.00167968
LOC101108024	20.522	10.1242	38.9512	1.3861	2.9928	1.24414	23.1991	1.87435	3.65553	0.000565554	0.00171927
OSBP2	26.9351	44.3908	11.7589	446.325	62.8488	185.377	27.6949	231.517	-3.06448	0.000575854	0.00174827
LOC105607782	30.1416	19.4697	19.8431	2.77221	1.4964	3.73241	23.1514	2.66701	3.0974	0.000591585	0.00179178
LOC105602590	11.5436	14.7969	8.08421	0	0	0	11.4749	0	5.50663	0.000609399	0.00184162
LOC105615368	26.9351	20.2484	20.578	4.15831	0	2.48828	22.5872	2.21553	3.32435	0.00061018	0.00184342
LOC105605139	25.0111	10.903	23.5177	0	1.4964	1.24414	19.8106	0.913513	4.44371	0.000625377	0.00188472
LOC105605438	13.4675	11.6818	8.81914	0	0	0	11.3228	0	5.48873	0.000627935	0.00189169
LOC105602685	15.3915	8.56665	10.289	0	0	0	11.4157	0	5.50178	0.000628676	0.00189342
SULT6B1	17.9567	14.0182	30.1321	2.77221	1.4964	0	20.7023	1.42287	3.9016	0.000643987	0.00193574
LOC106991478	13.4675	20.2484	13.9636	1.3861	0	0	15.8932	0.462034	5.01396	0.000650209	0.00195342
LOC105603450	13.4675	15.5757	5.87943	0	0	0	11.6409	0	5.52792	0.000659862	0.00198036
LCN2	0.641311	4.67272	0.734928	206.529	1.4964	94.5545	2.01632	100.86	-5.65826	0.000681907	0.00203882
LOC105603529	3.84787	13.2394	19.8431	0	0	0	12.3101	0	5.60587	0.00068237	0.00203994
LOC105609250	2.56524	2.33636	1.46986	19.4054	11.9712	22.3945	2.12382	17.9237	-3.07629	0.000687458	0.00205355
IDO1	1.92393	1.55757	5.1445	29.1082	5.9856	39.8124	2.87533	24.9687	-3.12754	0.000691605	0.00206353
LOC105602708	26.2938	11.6818	11.0239	0	1.4964	0	16.3332	0.4988	5.058	0.0006974	0.00207975
LOC106990826	35.2721	15.5757	11.7589	0	0	2.48828	20.8689	0.829425	4.55362	0.000700159	0.00208716
LOC106991041	20.522	17.9121	9.55407	0	0	1.24414	15.996	0.414713	5.02569	0.000706003	0.00210236
LOC105605077	28.859	23.3636	16.9033	4.15831	2.9928	1.24414	23.042	2.79842	3.06214	0.000715187	0.00212542
LOC105606521	10.261	10.903	11.7589	0	0	0	10.9743	0	5.44256	0.000727267	0.00215903
LOC105611820	28.2177	24.9212	16.9033	5.54441	0	0	23.3474	1.84814	3.66978	0.000731838	0.0021712
TWIST2	0	0	2.20478	31.8804	8.9784	8.70897	0.734928	16.5226	-4.5119	0.000745079	0.00220793
LOC106991739	16.0328	8.56665	8.81914	0	0	0	11.1395	0	5.46678	0.000760837	0.00225
-	11.5436	11.6818	24.2526	1.3861	0	0	15.826	0.462034	5.00853	0.000782578	0.00231103
LOC105603555	19.2393	17.1333	18.3732	0	1.4964	1.24414	18.2486	0.913513	4.32345	0.000783594	0.00231344
LOC105613121	17.9567	7.78786	8.08421	0	0	0	11.2763	0	5.48508	0.000790043	0.00233158
LOC105605293	10.261	32.709	24.9876	0	4.4892	0	22.6525	1.4964	4.001	0.000795099	0.0023441
LOC105602156	19.2393	20.2484	8.08421	0	0	1.24414	15.8573	0.414713	5.01245	0.000809722	0.00238264
DSC1	22.4459	17.1333	17.6383	0	2.9928	0	19.0725	0.9976	4.35595	0.000811349	0.00238621
LOC105615255	13.4675	10.1242	8.81914	0	0	0	10.8036	0	5.42147	0.000836601	0.00245358
LOC105605347	14.1088	10.1242	8.08421	0	0	0	10.7724	0	5.41756	0.000879691	0.00256754
-	9.61967	8.56665	31.6019	0	1.4964	0	16.5961	0.4988	5.077	0.000881689	0.00257272
MOBP	10.9023	6.23029	7.34928	5.54441	178.072	16.1738	8.16062	66.5966	-3.021	0.000882733	0.00257544
LOC105606936	41.6852	32.709	16.1684	0	8.9784	0	30.1876	2.9928	3.39776	0.000910251	0.00265036
-	14.1088	11.6818	6.61435	0	0	0	10.8017	0	5.42113	0.000924863	0.00269018
ND3	65.4137	105.136	72.023	999.38	83.7984	1004.02	80.8576	695.733	-3.10554	0.000925392	0.00269104
SYCP2	8.97835	10.903	27.9273	0	1.4964	0	15.9362	0.4988	5.01801	0.000925902	0.00269184
LOC106991480	57.718	32.709	4.40957	0	2.9928	4.97655	31.6122	2.65645	3.55581	0.000954913	0.00276641
LOC101115112	19.8806	15.5757	17.6383	1.3861	1.4964	0	17.6982	0.960835	4.26159	0.000971625	0.00281059
LOC106991129	12.1849	13.2394	6.61435	0	0	0	10.6795	0	5.4037	0.000977057	0.00282524
AHSP	10.261	3.89393	0	307.715	34.4172	78.3807	4.7183	140.171	-4.88558	0.000989085	0.00285643
LOC105616910	22.4459	22.5848	11.7589	0	2.9928	0	18.9298	0.9976	4.34263	0.000997639	0.00287861
LOC105610700	23.7285	17.9121	18.3732	1.3861	0	3.73241	20.0046	1.70617	3.48959	0.0009995	0.00288294
LOC105608754	24.3698	18.6909	17.6383	0	4.4892	0	20.233	1.4964	3.84439	0.00100334	0.00289362
ADGRE1	3.84787	0	0.734928	12.4749	16.4604	26.1269	1.5276	18.3541	-3.53462	0.00100978	0.00291035
C13H10orf113	41.6852	24.1424	11.7589	4.15831	4.4892	0	25.8621	2.8825	3.20702	0.00102818	0.00295637
LOC106990814	19.2393	15.5757	9.55407	0	0	1.24414	14.7897	0.414713	4.91283	0.00104233	0.00299294
EXO1	2.56524	0.778786	0.734928	23.5638	19.4532	6.22069	1.35965	16.4125	-3.55493	0.00104406	0.00299606
LOC105612301	21.8046	11.6818	11.0239	0	0	1.24414	14.8368	0.414713	4.91876	0.00105667	0.00302809
LOC101112038	10.9023	0.778786	16.9033	155.244	34.4172	176.668	9.52814	122.109	-3.67761	0.00106436	0.00304861
CCR8	25.0111	17.9121	16.9033	0	1.4964	3.73241	19.9422	1.74294	3.47621	0.00109919	0.00313869
-	0.641311	0	0	24.9499	5.9856	3.73241	0.21377	11.556	-5.49174	0.00110703	0.00315828
LOC106991098	16.6741	7.78786	7.34928	0	0	0	10.6037	0	5.39622	0.00111095	0.00316749
LOC105609822	16.6741	16.3545	10.289	0	0	1.24414	14.4392	0.414713	4.87737	0.00112147	0.00319431
LOC106990374	21.1633	14.0182	16.9033	1.3861	1.4964	0	17.3616	0.960835	4.23407	0.00112882	0.00321445
LOC105605868	10.9023	14.7969	5.87943	0	0	0	10.5262	0	5.38205	0.00114306	0.003251
LOC101105567	10.9023	14.7969	5.87943	0	0	0	10.5262	0	5.38205	0.00114306	0.003251
OLFM3	25.6524	3.11515	21.3129	0	1.4964	0	16.6935	0.4988	5.08931	0.00117277	0.00332605
CEP55	1.28262	0.778786	1.46986	11.0888	8.9784	22.3945	1.17709	14.1539	-3.58643	0.00117353	0.00332778
FCER2	0.641311	0.778786	0	26.336	2.9928	11.1972	0.473366	13.5087	-4.83333	0.00118123	0.00334758
LOC106991649	10.261	22.5848	11.0239	1.3861	0	0	14.6232	0.462034	4.89264	0.00120519	0.00340929
LOC105604300	19.8806	18.6909	22.0478	1.3861	4.4892	1.24414	20.2065	2.37315	3.12614	0.00123625	0.00349275
CD7	0	0	0.734928	9.70272	7.482	12.4414	0.244976	9.87537	-5.26982	0.00124332	0.00351145
LOC101117342	46.8157	20.2484	15.4335	1.3861	0	7.46483	27.4992	2.95031	3.16698	0.00126375	0.00356127
LOC106991775	11.5436	22.5848	19.1081	1.3861	1.4964	1.24414	17.7455	1.37555	3.69253	0.00126601	0.00356723
LDHAL6B	23.7285	24.1424	13.9636	1.3861	4.4892	1.24414	20.6115	2.37315	3.15441	0.00128131	0.00360635
LOC105615110	12.1849	3.89393	16.1684	0	0	0	10.7491	0	5.41461	0.00128296	0.00361056
LOC106991150	32.7069	19.4697	15.4335	5.54441	1.4964	0	22.5367	2.34694	3.2882	0.00128824	0.00362452
GJB5	1.28262	0.778786	4.40957	8.31662	31.4244	18.6621	2.15699	19.4677	-3.17415	0.00130233	0.00366104
LOC101106575	23.0872	25.6999	11.7589	0	4.4892	0	20.182	1.4964	3.8372	0.00130496	0.00366754
LOC105613103	37.196	9.34544	36.0115	0	7.482	1.24414	27.5177	2.90871	3.28789	0.00130812	0.00367597
LOC106991342	35.9134	15.5757	20.578	0	0	6.22069	24.0224	2.07356	3.46057	0.00130943	0.00367875
LOC105611607	26.9351	17.1333	11.7589	0	2.9928	1.24414	18.6091	1.41231	3.75423	0.00132712	0.00372393
NPY	2.56524	0.778786	2.20478	4.15831	34.4172	18.6621	1.84961	19.0792	-3.34628	0.00134006	0.00375748
-	1.28262	0.778786	1.46986	15.2471	8.9784	16.1738	1.17709	13.4664	-3.5116	0.00137665	0.0038451
LOC105605742	12.8262	21.806	1.46986	0	0	0	12.034	0	5.57487	0.00138793	0.00387191
LOC105607968	17.9567	19.4697	12.4938	1.3861	0	1.24414	16.64	0.876747	4.20269	0.00141748	0.0039448
LOC105606049	26.2938	25.6999	5.87943	0	0	2.48828	19.291	0.829425	4.44206	0.00141771	0.00394497
TRNAG-UCC	9.61967	7.00908	13.2287	0	0	0	9.95248	0	5.3023	0.00142056	0.00395148
LOC105611247	20.522	21.0272	11.0239	0	0	2.48828	17.5244	0.829425	4.29918	0.00143956	0.00399852
LOC105607988	14.1088	10.1242	5.87943	0	0	0	10.0375	0	5.31584	0.00146275	0.00405755
LOC101122142	1.92393	20.2484	54.3847	0	2.9928	1.24414	25.519	1.41231	4.20062	0.00146697	0.00406795
LOC106991077	10.261	19.4697	11.7589	0	1.4964	0	13.8298	0.4988	4.81254	0.00147114	0.0040769
-	18.598	14.7969	23.5177	4.15831	0	0	18.9709	1.3861	3.78598	0.00149229	0.00412956
LOC101122560	9.61967	17.1333	13.9636	1.3861	0	0	13.5722	0.462034	4.78554	0.00156947	0.00432547
LOC105610042	10.9023	13.2394	16.1684	1.3861	0	0	13.4367	0.462034	4.77218	0.00157835	0.00434943
NIPAL1	17.3154	13.2394	27.9273	2.77221	2.9928	0	19.494	1.92167	3.38894	0.00158143	0.00435741
C1H1orf146	23.0872	14.7969	16.1684	1.3861	1.4964	2.48828	18.0175	1.79026	3.31598	0.00158446	0.00436471
TRNAS-GGA	16.0328	10.903	13.2287	0	1.4964	0	13.3882	0.4988	4.76931	0.00159082	0.00438117
LOC105604986	26.2938	17.1333	9.55407	0	0	2.48828	17.6604	0.829425	4.31372	0.00159652	0.00439477
LOC105615441	17.3154	6.23029	6.61435	0	0	0	10.0533	0	5.32005	0.00167213	0.00458429
LOC106991524	19.8806	17.9121	5.1445	0	1.4964	0	14.3124	0.4988	4.86533	0.0016768	0.004596
LOC105612687	21.1633	15.5757	24.9876	2.77221	4.4892	0	20.5755	2.42047	3.13835	0.00167725	0.00459667
-	2.56524	1.55757	60.2641	0	0	1.24414	21.4623	0.414713	5.44792	0.00169079	0.00463048
SLC17A7	0	0	0	11.0888	4.4892	6.22069	0	7.26624	-5.78675	0.00169275	0.00463529
LOC105610401	15.3915	20.2484	14.6986	2.77221	0	0	16.7795	0.924069	4.19443	0.00170918	0.00467529
LOC101123370	0.641311	0	0	2.77221	17.9568	9.9531	0.21377	10.2274	-5.31364	0.00171027	0.00467773
LOC106991483	25.6524	14.0182	11.7589	0	0	2.48828	17.1431	0.829425	4.27094	0.00173112	0.0047252
-	0	2.33636	0	8.31662	41.8992	2.48828	0.778786	17.568	-4.54905	0.00174492	0.00476063
TNNI1	0	3.11515	0.734928	19.4054	11.9712	13.6855	1.28336	15.0207	-3.60109	0.00175128	0.00477516
-	14.7502	13.2394	19.8431	1.3861	0	1.24414	15.9442	0.876747	4.14138	0.00177757	0.00483939
LOC106990812	31.4242	23.3636	10.289	1.3861	0	4.97655	21.6923	2.12089	3.29687	0.00178237	0.00485074
LOC105604370	16.0328	5.4515	8.08421	0	0	0	9.85616	0	5.29127	0.00178426	0.00485529
SLC22A8	0	0	0.734928	23.5638	4.4892	3.73241	0.244976	10.5951	-5.36704	0.001789	0.00486705
LOC100192427	0.641311	0.778786	2.93971	18.0193	5.9856	22.3945	1.45327	15.4665	-3.42869	0.0018321	0.00497608
LOC105603410	13.4675	8.56665	6.61435	0	0	0	9.54951	0	5.24422	0.00183695	0.00498808
-	14.1088	14.7969	28.6622	2.77221	2.9928	0	19.1893	1.92167	3.36481	0.00183741	0.00498873
LOC105615114	10.9023	15.5757	3.67464	0	0	0	10.0509	0	5.31536	0.00185558	0.00503392
-	39.7613	45.1696	36.0115	2027.87	8.9784	787.539	40.3141	941.462	-4.54562	0.00186671	0.00505995
GIMAP1	5.13049	0	0.734928	30.4943	5.9856	28.6152	1.95514	21.6983	-3.43049	0.0018825	0.00509854
LOC105609033	21.8046	13.2394	22.0478	0	4.4892	1.24414	19.0306	1.91111	3.35953	0.00189158	0.00512074
STK31	41.0439	15.5757	11.0239	4.15831	2.9928	0	22.5479	2.3837	3.27921	0.00190599	0.0051555
LOC105604636	12.8262	18.6909	8.08421	0	1.4964	0	13.2004	0.4988	4.74645	0.00195011	0.00526434
LOC105607987	23.0872	19.4697	9.55407	0	1.4964	2.48828	17.3703	1.32823	3.68283	0.00199389	0.00537246
LOC106990825	0	0.778786	0.734928	11.0888	5.9856	16.1738	0.504572	11.0827	-4.5179	0.00200411	0.0053981
LOC105606428	0	0	2.20478	23.5638	13.4676	4.97655	0.734928	14.0026	-4.2694	0.00204007	0.00548597
-	1.28262	1.55757	0.734928	18.0193	2.9928	22.3945	1.19171	14.4689	-3.61097	0.00205913	0.00553401
TRH	0	0	0	2.77221	16.4604	3.73241	0	7.65501	-5.8536	0.00206342	0.00554488
LOC105603449	14.7502	7.00908	6.61435	0	0	0	9.45786	0	5.2312	0.00207167	0.0055638
LOC101112427	4.48918	0	0	302.17	5.9856	159.25	1.49639	155.802	-6.68198	0.00207997	0.00558285
-	0	0	0	18.0193	2.9928	2.48828	0	7.83347	-5.89323	0.00215354	0.00576553
SH3RF2	18.598	22.5848	13.9636	2.77221	1.4964	2.48828	18.3822	2.25229	3.01741	0.00215965	0.00578123
-	10.261	25.6999	27.1923	2.77221	4.4892	0	21.0511	2.42047	3.16542	0.00217255	0.00580902
CCL21	1.92393	0.778786	2.93971	18.0193	16.4604	11.1972	1.88081	15.2257	-3.00631	0.00219427	0.00586368
LOC105614981	14.1088	12.4606	11.0239	0	0	1.24414	12.5311	0.414713	4.67309	0.00220887	0.00589996
-	6.41311	9.34544	11.7589	0	0	0	9.17247	0	5.18271	0.0022177	0.00592082
LOC105607721	23.0872	14.7969	9.55407	1.3861	1.4964	0	15.8127	0.960835	4.09772	0.00226238	0.0060324
LOC101122087	1.28262	52.9575	3.67464	0	0	1.24414	19.3049	0.414713	5.29243	0.00226747	0.00604317
LOC105611842	14.1088	7.78786	5.87943	0	0	0	9.25871	0	5.20016	0.00230725	0.00613998
LOC106991543	12.1849	15.5757	19.8431	1.3861	1.4964	1.24414	15.8679	1.37555	3.53241	0.00232523	0.00618424
LOC105609024	10.9023	16.3545	10.289	0	0	1.24414	12.5153	0.414713	4.66926	0.00233833	0.00621765
LOC105615772	16.0328	24.1424	10.289	0	1.4964	2.48828	16.8214	1.32823	3.63407	0.00236733	0.00628692
-	0	1.55757	4.40957	16.6332	20.9496	14.9297	1.98905	17.5042	-3.15923	0.00236952	0.00629188
LOC105605156	11.5436	13.2394	3.67464	0	0	0	9.48587	0	5.2327	0.00238231	0.00632146
LOC101112343	0	0	0	23.5638	1.4964	1.24414	0	8.7681	-6.05601	0.00243951	0.00646388
LOC105616095	14.1088	9.34544	4.40957	0	0	0	9.28795	0	5.20429	0.00247389	0.00654638
GJA5	2.56524	1.55757	5.1445	91.4828	14.964	0	3.0891	35.4823	-3.51988	0.00249993	0.00660921
XCL1	1.92393	0	3.67464	9.70272	14.964	26.1269	1.86619	16.9312	-3.17341	0.00258891	0.00681941
-	2.56524	0	0	12.4749	1.4964	38.5683	0.855081	17.5132	-4.29523	0.00258998	0.00682145
LOC105616286	11.5436	9.34544	5.87943	0	0	0	8.92282	0	5.14549	0.00260684	0.00686272
GATA1	0.641311	0	2.93971	54.058	0	12.4414	1.19367	22.1665	-4.21637	0.00262027	0.00689334
GFI1B	0	0	0	19.4054	0	7.46483	0	8.95676	-6.08988	0.00262957	0.00691387
LOC106991661	21.8046	13.2394	20.578	1.3861	4.4892	1.24414	18.5406	2.37315	3.00208	0.00263217	0.00691916
-	15.3915	25.6999	16.1684	0	0	4.97655	19.0866	1.65885	3.44153	0.00267335	0.00702017
LOC105607961	17.9567	15.5757	12.4938	0	0	2.48828	15.3421	0.829425	4.10939	0.00267883	0.00703135
LOC105610517	12.1849	7.78786	6.61435	0	0	0	8.86238	0	5.13639	0.00268059	0.00703518
ABCB5	17.3154	11.6818	16.9033	0	0	2.48828	15.3002	0.829425	4.10607	0.00275645	0.00721454
LOC101112481	14.7502	11.6818	9.55407	0	1.4964	0	11.9953	0.4988	4.61062	0.00278752	0.00728758
-	12.1849	20.2484	17.6383	2.77221	1.4964	1.24414	16.6905	1.83758	3.18755	0.00280669	0.00733438
LOC105616425	17.3154	15.5757	14.6986	2.77221	1.4964	0	15.8632	1.42287	3.51644	0.00284341	0.0074152
LOC105613059	14.1088	8.56665	4.40957	0	0	0	9.02835	0	5.16369	0.00286691	0.00746887
LOC105611049	21.8046	21.806	9.55407	4.15831	0	0	17.7216	1.3861	3.68713	0.00287513	0.0074886
LOC101103112	13.4675	6.23029	6.61435	0	0	0	8.77073	0	5.12237	0.00303449	0.00786986
TAC3	5.13049	8.56665	83.7818	618.202	236.431	255.048	32.493	369.894	-3.50958	0.0030893	0.00800122
ENPP3	0	0.778786	0	13.861	1.4964	12.4414	0.259595	9.26627	-5.18045	0.00315395	0.00815398
-	12.1849	10.903	3.67464	0	0	0	8.92085	0	5.14505	0.003155	0.00815488
LOC105609948	21.8046	20.2484	8.81914	2.77221	1.4964	1.24414	16.9574	1.83758	3.21341	0.00316805	0.00818493
-	0.641311	0	0	263.36	0	77.1366	0.21377	113.499	-8.78937	0.0031803	0.00821474
LOC101121905	10.9023	10.903	4.40957	0	0	0	8.73829	0	5.1147	0.00319755	0.0082519
LOC106991157	1.92393	0.778786	2.20478	22.1777	5.9856	14.9297	1.63583	14.3643	-3.12643	0.0032001	0.00825662
KLK12	2.56524	0.778786	1.46986	12.4749	8.9784	19.9062	1.60463	13.7865	-3.08444	0.00327389	0.00842814
LOC105609624	16.6741	12.4606	6.61435	0	0	1.24414	11.9163	0.414713	4.60166	0.00331785	0.00853271
LOC105610151	6.41311	10.903	8.08421	0	0	0	8.46678	0	5.06691	0.00333103	0.00856334
LOC105612405	17.3154	20.2484	9.55407	0	1.4964	2.48828	15.706	1.32823	3.53648	0.00337613	0.00866906
-	13.4675	12.4606	16.1684	0	1.4964	1.24414	14.0322	0.913513	3.94399	0.00343703	0.00881365
LOC105601924	1.28262	0	2.93971	41.5831	7.482	3.73241	1.40744	17.5992	-3.6343	0.00345931	0.0088619
LOC105603991	14.7502	6.23029	5.1445	0	0	0	8.70831	0	5.11261	0.00346912	0.00888217
NKX2-4	0	0	0.734928	16.6332	7.482	2.48828	0.244976	8.86784	-5.10778	0.00350624	0.00896717
LOC106991911	21.1633	14.0182	9.55407	0	0	2.48828	14.9118	0.829425	4.07201	0.00353935	0.00904482
SLC13A3	1.92393	1.55757	1.46986	26.336	10.4748	6.22069	1.65045	14.3438	-3.11141	0.00354898	0.00906541
LOC105604031	12.8262	10.903	2.93971	0	0	0	8.88965	0	5.14025	0.00356236	0.00909455
-	0.641311	0.778786	1.46986	9.70272	16.4604	7.46483	0.963318	11.2093	-3.54393	0.00356796	0.00910381
LOC105610606	22.4459	19.4697	13.9636	5.54441	0	0	18.6264	1.84814	3.34297	0.00360265	0.00918012
LOC106990151	5.7718	14.7969	14.6986	0	1.4964	0	11.7558	0.4988	4.57732	0.00365577	0.00930315
LOC106991045	9.61967	8.56665	6.61435	0	0	0	8.26689	0	5.0348	0.00365927	0.00930793
FSHR	1.92393	13.2394	12.4938	0	0	0	9.21903	0	5.18776	0.00374106	0.00949606
LOC105615651	12.1849	3.89393	9.55407	0	0	0	8.5443	0	5.08459	0.00376065	0.00954262
LOC105609873	11.5436	9.34544	4.40957	0	0	0	8.43287	0	5.06418	0.00379669	0.00962138
LOC101121770	22.4459	6.23029	15.4335	0	1.4964	1.24414	14.7032	0.913513	4.01499	0.00379729	0.00962183
LOC105604663	6.41311	9.34544	8.81914	0	0	0	8.19256	0	5.01982	0.00385056	0.0097493
LOC101111988	5.7718	10.903	16.9033	340.981	17.9568	36.08	11.1927	131.673	-3.558	0.00387248	0.00980051
LOC105608952	11.5436	4.67272	8.81914	0	0	0	8.34515	0	5.05026	0.00390583	0.00987515
LOC101108033	46.1744	261.672	41.8909	3996.14	555.165	247.583	116.579	1599.63	-3.77871	0.00391289	0.00989191
LOC105616207	14.7502	8.56665	10.289	0	1.4964	0	11.2019	0.4988	4.51282	0.00395386	0.00998343

## Sheet: Ovary
Supplementary table S3 DEGs identified in ovary between estrus group and anestrus group
DEGs	EL1	EL2	EL3	LC1_12	LC1_13	LC1_14	EL	FLC	log2FoldChange	pvalue	padj
OVGP1	20.6898	23.3391	7.94229	8933.91	8082.66	6174.6	17.3237	7730.39	-8.79263	1.52198e-93	3.42614e-89
-	5.79315	2.80069	2.97836	1319.15	873.801	1170.57	3.8574	1121.17	-8.15696	9.13129e-53	1.02777e-48
TSPAN1	5.79315	5.60138	2.97836	1110.35	756.806	537.085	4.79096	801.414	-7.37223	4.43381e-41	3.32698e-37
KIF21B	1423.46	825.269	1374.02	39.1504	52.099	43.8181	1207.58	45.0225	4.74224	1.01952e-37	5.73761e-34
EHF	4.96556	3.73425	6.94951	789.534	449.697	458.212	5.21644	565.814	-6.76869	4.56117e-37	2.05353e-33
LOC101103644	6.62075	2.80069	15.8846	808.022	1488.02	1801.55	8.43534	1365.86	-7.35313	8.60631e-36	3.22895e-32
EPCAM	37.2417	52.2795	15.8846	1589.94	1420.38	1557.42	35.1353	1522.58	-5.43395	2.14627e-35	6.90209e-32
MYH14	14.8967	21.4719	22.8341	373.017	536.528	534.581	19.7342	481.375	-4.61526	2.11043e-33	5.9385e-30
CLDN7	0.827593	0.933563	2.97836	578.556	811.648	597.178	1.57984	662.461	-8.75943	1.77186e-32	4.43182e-29
CRB2	3.31037	2.80069	0.992787	369.754	1018.22	837.552	2.36795	741.841	-8.26419	3.26708e-31	7.35453e-28
ATP2C2	19.8622	14.937	14.8918	332.779	591.369	465.724	16.5637	463.291	-4.80103	4.36755e-31	8.93799e-28
UGGT1	2262.64	2542.09	2871.14	216.415	281.517	306.727	2558.62	268.22	3.25425	1.73302e-30	3.25101e-27
LOC101113807	0.827593	3.73425	0	1050.54	660.835	1991.85	1.52061	1234.41	-9.66317	4.04994e-30	7.01294e-27
PERP	5.79315	2.80069	18.8629	709.058	925.9	721.121	9.15226	785.36	-6.44201	2.77847e-29	4.46758e-26
KRT7	21.5174	4.66781	17.8702	614.444	1126.07	906.409	14.6851	882.308	-5.90373	1.1886e-28	1.78378e-25
PLAC9	43.8625	35.4754	46.661	925.473	526.474	997.801	41.9996	816.583	-4.28072	1.61068e-28	2.26613e-25
CFB	143.174	185.779	74.459	2743.79	5874.39	6038.14	134.471	4885.44	-5.18241	7.76738e-28	1.02854e-24
C3	697.661	472.383	1010.66	13591.7	9888.76	12865	726.9	12115.2	-4.05908	1.10195e-27	1.37811e-24
FBP2	8.27593	3.73425	6.94951	185.965	286.087	315.491	6.3199	262.514	-5.3678	1.88936e-25	2.23849e-22
RSPH1	15.7243	29.874	28.7908	873.272	530.13	434.425	24.7964	612.609	-4.63272	8.37337e-25	9.42464e-22
PTPRB	1548.43	1540.38	2264.55	160.952	104.198	175.273	1784.45	146.807	3.60631	1.2165e-24	1.30403e-21
TEKT1	9.93112	3.73425	6.94951	1874.87	566.691	409.386	6.87163	950.316	-7.10367	1.94133e-24	1.98643e-21
DNAH12	2.48278	5.60138	4.96393	750.383	289.744	262.909	4.34936	434.345	-6.65677	5.5621e-24	5.44385e-21
SPAG6	8.27593	8.40206	7.94229	220.765	192.858	158.997	8.20676	190.873	-4.53964	6.56101e-24	6.09808e-21
EFR3B	1046.91	776.724	941.162	18.4877	59.4111	31.2987	921.597	36.3992	4.65168	6.77233e-24	6.09808e-21
CXHXorf36	577.66	716.042	1500.1	39.1504	30.1626	40.0623	931.268	36.4584	4.67814	2.74174e-23	2.37382e-20
TACSTD2	9.10353	25.2062	22.8341	442.617	1049.29	1543.65	19.0479	1011.85	-5.73754	3.65242e-23	3.04517e-20
ARMC3	7.44834	4.66781	5.95672	457.843	211.138	214.083	6.02429	294.355	-5.60367	5.91336e-23	4.75413e-20
NME9	1.65519	1.86713	1.98557	349.091	244.957	184.036	1.83596	259.361	-7.14931	8.75696e-23	6.79751e-20
SLC34A2	4.13797	6.53494	0.992787	257.74	192.858	175.273	3.88856	208.624	-5.72954	2.18679e-22	1.63713e-19
PRR15L	9.10353	8.40206	6.94951	158.777	370.177	324.254	8.1517	284.403	-5.12014	2.2545e-22	1.63713e-19
PRG4	14.0691	9.33563	30.7764	500.256	1812.5	906.409	18.0604	1073.05	-5.89889	5.59525e-22	3.70455e-19
WFDC2	0.827593	3.73425	0	314.291	211.138	261.657	1.52061	262.362	-7.42905	6.07799e-22	3.90919e-19
LOC101116286	24.8278	31.7411	36.7331	740.596	670.889	326.758	31.1007	579.414	-4.22346	1.18997e-21	7.23986e-19
TMEM125	0.827593	2.80069	2.97836	146.814	251.355	260.405	2.20221	219.525	-6.67511	1.64781e-21	9.51122e-19
LOC101117946	22.345	68.1501	133.033	2525.2	3997	4138.94	74.5095	3553.71	-5.57883	1.87134e-21	1.05314e-18
SCD	3000.03	7458.23	5480.18	135.939	213.88	333.018	5312.81	227.612	4.54589	2.16341e-21	1.18782e-18
DNAH5	4.96556	18.6713	3.97115	1442.04	576.745	454.457	9.20265	824.414	-6.48752	2.55312e-21	1.36841e-18
SOGA1	620.695	670.298	520.22	31.5379	67.6373	50.0779	603.738	49.751	3.59594	4.2017e-21	2.19964e-18
AP1M2	13.2415	24.2726	14.8918	224.028	401.254	326.758	17.4686	317.346	-4.1867	4.71653e-21	2.41304e-18
ZNF469	980.698	949.433	1087.1	48.938	111.51	92.644	1005.74	84.3641	3.57334	5.64402e-21	2.80367e-18
GPM6A	291.313	264.198	243.233	2043.44	4934.78	4992.76	266.248	3990.33	-3.90545	5.72914e-21	2.80367e-18
RAB25	2.48278	1.86713	4.96393	147.902	362.865	211.579	3.10461	240.782	-6.29685	9.19955e-21	4.40619e-18
RIPK4	2.48278	8.40206	2.97836	166.389	306.196	478.244	4.62107	316.943	-6.10715	1.48796e-20	6.97821e-18
S100A1	10.7587	3.73425	11.9134	339.304	196.514	225.35	8.80214	253.723	-4.84803	1.56295e-20	7.18034e-18
DNAH6	3.31037	3.73425	2.97836	369.754	180.975	146.478	3.34099	232.402	-6.11885	2.06778e-20	9.30956e-18
CDHR4	7.44834	6.53494	13.899	330.604	223.934	171.517	9.2941	242.018	-4.71422	2.87701e-20	1.26989e-17
BMP3	9.93112	14.0034	4.96393	184.877	485.343	353.049	9.63283	341.09	-5.14091	4.8443e-20	2.09712e-17
LRRC10B	4.13797	3.73425	0.992787	363.229	197.428	145.226	2.955	235.294	-6.2893	6.68507e-20	2.83939e-17
ELF3	6.62075	3.73425	7.94229	132.676	384.801	429.418	6.0991	315.632	-5.69507	9.44596e-20	3.93774e-17
ATP6V1B1	4.13797	10.2692	0.992787	199.015	370.177	550.856	5.13331	373.349	-6.17869	1.56679e-19	6.29822e-17
ST3GAL1	1197.53	1205.23	1731.42	107.664	161.781	190.296	1378.06	153.247	3.16958	3.7184e-19	1.46851e-16
CAPSL	0.827593	5.60138	0	1738.93	474.375	284.192	2.14299	832.5	-8.60458	3.89802e-19	1.5129e-16
BMPR2	853.249	1022.25	1166.52	79.3884	125.22	147.73	1014.01	117.446	3.11118	8.09282e-19	3.03629e-16
LRRN4	0.827593	7.4685	8.93508	184.877	610.564	610.95	5.74372	468.797	-6.3743	1.2491e-18	4.53525e-16
S100A13	1137.11	997.045	584.751	11959.4	8160.35	7416.53	906.303	9178.75	-3.33999	1.37126e-18	4.89977e-16
FOXJ1	0	0.933563	0.992787	607.919	477.117	350.545	0.642116	478.527	-9.61355	1.65805e-18	5.83193e-16
CFAP161	3.31037	4.66781	3.97115	684.045	231.246	141.47	3.98311	352.254	-6.47114	2.4198e-18	8.25334e-16
TFF3	0	0	0	541.581	577.659	201.563	0	440.268	-11.3532	2.4676e-18	8.29076e-16
DLK1	25.6554	34.5418	12.9062	756.908	506.366	304.223	24.3678	522.499	-4.41959	7.51967e-18	2.38416e-15
-	44.69	32.6747	171.752	4079.26	2209.18	5145.5	83.0389	3811.31	-5.52245	7.81203e-18	2.44245e-15
SLC44A4	1.65519	2.80069	2.97836	246.865	130.705	112.675	2.47808	163.415	-6.06091	1.21883e-17	3.61015e-15
TMED8	665.385	849.542	411.014	19.5752	51.185	42.5662	641.98	37.7755	4.08409	1.43669e-17	4.20016e-15
SFRP5	14.8967	23.3391	10.9207	201.19	883.855	742.404	16.3855	609.15	-5.2155	1.66235e-17	4.7976e-15
ENKUR	38.8969	46.6781	35.7403	1436.6	531.044	488.259	40.4384	818.636	-4.33928	1.93152e-17	5.50384e-15
PPP2R2B	40.5521	24.2726	23.8269	395.854	305.282	251.641	29.5505	317.593	-3.42001	2.82698e-17	7.95477e-15
LOC105606369	153.105	168.041	275.002	11.9626	8.22616	3.75584	198.716	7.98154	4.61902	3.56483e-17	9.90714e-15
LOC105606137	181.243	199.782	116.156	2432.76	1104.13	2287.31	165.727	1941.4	-3.54941	5.52085e-17	1.47952e-14
CCDC180	3.31037	2.80069	0	230.553	127.962	121.439	2.03702	159.985	-6.24987	6.96522e-17	1.84464e-14
-	234.209	161.506	217.42	6.52507	8.22616	18.7792	204.379	11.1768	4.22216	7.31588e-17	1.89552e-14
-	1269.53	1689.75	860.746	66.3382	140.759	117.683	1273.34	108.26	3.55484	7.32576e-17	1.89552e-14
LRRC23	1.65519	4.66781	1.98557	119.626	119.736	98.9038	2.76952	112.755	-5.35966	8.02698e-17	2.05336e-14
CCDC146	43.0349	26.1398	14.8918	1978.18	606.908	524.566	28.0221	1036.55	-5.20428	1.22139e-16	3.05497e-14
WDR63	7.44834	5.60138	2.97836	972.236	239.473	158.997	5.34269	456.902	-6.40657	1.7267e-16	4.2714e-14
CFTR	8.27593	4.66781	4.96393	103.314	109.682	127.699	5.96923	113.565	-4.23317	2.39461e-16	5.85924e-14
SCEL	0.827593	3.73425	16.8774	282.753	817.132	992.794	7.14641	697.559	-6.63123	2.64474e-16	6.4017e-14
SPTSSB	2.48278	0	5.95672	105.489	240.387	239.122	2.81317	194.999	-6.13817	4.3377e-16	1.02785e-13
DCDC2	3.31037	0	4.96393	181.615	116.994	116.431	2.7581	138.347	-5.65596	5.37702e-16	1.26086e-13
LOC101102587	4.13797	0.933563	2.97836	95.7011	219.364	125.195	2.6833	146.753	-5.75701	5.71212e-16	1.32562e-13
MMRN2	1655.19	1472.23	2654.71	244.69	137.103	242.878	1927.38	208.223	3.21208	6.62131e-16	1.52094e-13
TEX26	0.827593	1.86713	0	525.268	184.632	160.249	0.89824	290.05	-8.31615	8.02563e-16	1.80665e-13
ZBBX	0	1.86713	0.992787	480.68	165.437	165.257	0.953304	270.458	-8.19707	1.12569e-15	2.50896e-13
C18H14orf132	137.381	104.559	146.932	4.35005	9.14017	3.75584	129.624	5.74869	4.45284	1.17109e-15	2.58456e-13
PPL	103.449	96.1569	69.4951	604.657	1873.74	1203.12	89.7004	1227.17	-3.77336	1.39058e-15	3.00993e-13
TJP3	11.5863	9.33563	7.94229	103.314	244.957	187.792	9.62141	178.687	-4.20948	1.42506e-15	3.05518e-13
LOC101118536	11.5863	8.40206	5.95672	255.565	220.278	100.156	8.64836	192	-4.46313	2.03823e-15	4.13356e-13
MPZL2	89.3801	86.8213	25.8125	805.847	1162.63	1094.2	67.338	1020.89	-3.91952	2.1492e-15	4.3197e-13
DRC3	48.828	26.1398	16.8774	650.332	366.521	379.34	30.615	465.398	-3.91871	2.16969e-15	4.3223e-13
DYDC2	0.827593	0.933563	0	553.544	227.59	227.854	0.587052	336.329	-9.11625	2.53825e-15	4.96856e-13
SLC28A3	0	0	0.992787	560.069	233.074	304.223	0.330929	365.789	-10.123	2.64796e-15	5.13864e-13
LOC101106609	234.209	239.926	306.771	23.9253	25.5925	42.5662	260.302	30.6946	3.09502	3.45882e-15	6.65482e-13
LOC105612017	52.966	64.4158	29.7836	794.971	539.27	379.34	49.0551	571.194	-3.53979	4.14683e-15	7.84449e-13
GRHL2	0	1.86713	6.94951	112.014	260.495	244.13	2.93888	205.546	-6.18126	5.20874e-15	9.61098e-13
MMP7	0	0	0	736.246	191.03	113.927	0	347.068	-11.0094	5.47069e-15	1.00123e-12
RSPH4A	0.827593	1.86713	0.992787	355.616	170.007	86.3843	1.22917	204.003	-7.38545	6.33478e-15	1.15002e-12
ROPN1	0	0.933563	0	331.691	264.151	220.343	0.311188	272.062	-9.69661	6.50901e-15	1.1722e-12
CFAP45	7.44834	8.40206	26.8052	379.542	358.295	202.815	14.2185	313.551	-4.47654	6.82626e-15	1.21957e-12
RIBC2	0	0	0	348.004	138.931	131.454	0	206.13	-10.2576	6.94375e-15	1.23079e-12
NPW	10.7587	9.33563	4.96393	155.514	113.338	107.667	8.35276	125.507	-3.89616	8.25869e-15	1.43972e-12
CAPS2	4.13797	0.933563	1.98557	219.677	97.7999	98.9038	2.35237	138.794	-5.85166	8.31431e-15	1.43972e-12
ERICH2	9.10353	4.66781	4.96393	251.215	217.536	82.6285	6.24509	183.793	-4.86744	8.69339e-15	1.49387e-12
MAP3K19	1.65519	2.80069	0.992787	294.716	109.682	93.896	1.81622	166.098	-6.5098	9.07195e-15	1.54711e-12
ADGRG7	6.62075	18.6713	15.8846	150.077	264.151	369.324	13.7255	261.184	-4.25872	9.38163e-15	1.58789e-12
CCDC153	16.5519	19.6048	4.96393	580.732	281.517	206.571	13.7069	356.273	-4.69323	9.47118e-15	1.59109e-12
DDO	1.65519	1.86713	0.992787	81.5634	106.026	111.423	1.50503	99.6709	-6.0363	1.20876e-14	2.01148e-12
EFNB2	326.899	312.743	620.492	33.7129	51.185	32.5506	420.045	39.1495	3.41655	1.27218e-14	2.07522e-12
-	4.13797	0.933563	1.98557	195.752	120.65	77.6207	2.35237	131.341	-5.77273	1.35047e-14	2.18708e-12
CDH1	24.0002	18.6713	76.4446	533.968	1159.89	1452.26	39.7053	1048.7	-4.7272	1.44903e-14	2.32994e-12
DCDC2B	20.6898	5.60138	2.97836	760.171	336.358	246.633	9.75652	447.721	-5.50138	1.49059e-14	2.36301e-12
MUC20	12.4139	13.0699	12.9062	118.539	107.854	138.966	12.7967	121.786	-3.24966	1.61614e-14	2.54413e-12
FAM216B	16.5519	3.73425	4.96393	881.972	293.4	189.044	8.41668	454.805	-5.74016	1.67346e-14	2.61606e-12
PPP1R32	0	0	0	241.428	151.727	100.156	0	164.437	-9.9323	1.81457e-14	2.79779e-12
DAW1	0	0	0	486.118	144.415	107.667	0	246.067	-10.5132	2.10188e-14	3.17553e-12
FAM183A	0.827593	0.933563	0	692.745	235.817	161.501	0.587052	363.354	-9.23021	2.19058e-14	3.28742e-12
SORL1	2942.09	4852.66	5768.09	384.979	642.554	666.036	4520.95	564.523	3.00151	2.20515e-14	3.28742e-12
KIF19	11.5863	9.33563	0.992787	258.828	191.03	148.982	7.30491	199.613	-4.75121	3.22773e-14	4.71815e-12
TMEM30B	8.27593	11.2028	15.8846	109.839	275.119	199.059	11.7878	194.672	-4.05558	3.25319e-14	4.72469e-12
SEMA7A	666.213	1351.8	1086.11	21.7502	95.9718	46.322	1034.71	54.6814	4.23607	3.46803e-14	4.94107e-12
CLSTN2	395.59	419.17	918.328	35.8879	45.7009	62.5973	577.696	48.062	3.59031	3.53748e-14	5.00832e-12
LOC101106237	4.96556	2.80069	0.992787	302.328	139.845	80.1246	2.91968	174.099	-5.86718	3.61742e-14	5.05829e-12
LRRC32	412.969	421.037	700.907	51.1131	66.7233	27.5428	511.638	48.4597	3.39133	3.93321e-14	5.46546e-12
-	417.935	335.149	328.612	28.2753	60.3252	28.7948	360.565	39.1317	3.19219	4.52829e-14	6.25367e-12
PAGE4	0	5.60138	0.992787	135.939	339.1	125.195	2.19805	200.078	-6.53345	4.75944e-14	6.41754e-12
AK7	62.0695	26.1398	56.5888	1447.48	578.573	495.771	48.266	840.608	-4.12149	5.49732e-14	7.27942e-12
PAPSS2	2248.57	1743.89	2089.82	87.001	252.269	242.878	2027.43	194.049	3.38498	5.53623e-14	7.28807e-12
AK9	20.6898	9.33563	9.92787	554.631	205.654	181.532	13.3178	313.939	-4.55017	6.43052e-14	8.22486e-12
PDZK1IP1	0	0	6.94951	166.389	262.323	164.005	2.3165	197.572	-6.48136	7.24796e-14	9.11502e-12
TCTEX1D4	0.827593	1.86713	1.98557	376.279	144.415	67.6051	1.5601	196.1	-6.99723	7.62004e-14	9.52971e-12
CBLN2	33.1037	43.8774	37.7259	275.141	514.592	254.145	38.2357	347.959	-3.1886	7.73514e-14	9.58727e-12
WNT2	4.96556	5.60138	7.94229	117.451	195.6	80.1246	6.16974	131.059	-4.42106	7.75125e-14	9.58727e-12
DHCR24	22559.4	24568.6	48381.5	1236.5	2251.23	3694.49	31836.5	2394.07	3.73324	1.13674e-13	1.37576e-11
LOC105604781	304.554	233.391	170.759	13.0501	28.3345	25.0389	236.235	22.1412	3.41245	1.41668e-13	1.69633e-11
MESP2	0.827593	8.40206	5.95672	642.72	628.844	73.8648	5.06213	448.476	-6.48466	1.59589e-13	1.9008e-11
TMEM245	1487.19	906.489	747.568	46.763	101.456	127.699	1047.08	91.9725	3.5106	1.67892e-13	1.97875e-11
STX19	7.44834	14.937	6.94951	117.451	119.736	111.423	9.77828	116.204	-3.5736	1.6984e-13	1.99129e-11
C4BPA	9.93112	22.4055	191.608	4984.07	4685.25	9922.93	74.6482	6530.75	-6.45311	1.7951e-13	2.09376e-11
CSF2RB	336.831	272.6	789.265	20.6627	26.5065	42.5662	466.232	29.9118	3.96813	2.25949e-13	2.60837e-11
CD93	862.352	931.695	3066.72	107.664	95.0578	51.3298	1620.26	84.6838	4.25591	2.28351e-13	2.62265e-11
CCDC78	22.345	26.1398	13.899	471.98	223.934	181.532	20.7946	292.482	-3.81135	2.45973e-13	2.79652e-11
CFAP65	1.65519	2.80069	0	138.114	109.682	67.6051	1.48529	105.134	-6.12021	2.5025e-13	2.83084e-11
HSPG2	17660	20585.1	22640.5	1634.53	3906.51	1801.55	20295.2	2447.53	3.0515	2.87631e-13	3.20538e-11
PIFO	0	0	0	436.092	109.682	76.3687	0	207.381	-10.2665	3.60461e-13	3.91997e-11
CEMIP	469.245	378.093	208.485	39.1504	32.9046	46.322	351.941	39.459	3.16226	4.036e-13	4.368e-11
CFAP52	16.5519	10.2692	13.899	220.765	142.587	108.919	13.5734	157.424	-3.5326	4.718e-13	5.05747e-11
PEG3	1178.49	962.503	2185.12	119.626	189.202	76.3687	1442.04	128.399	3.48606	4.77001e-13	5.08899e-11
PTPRO	17.3795	9.33563	26.8052	144.639	387.543	429.418	17.8401	320.533	-4.17042	5.04693e-13	5.35903e-11
PRRG4	59.5867	70.9508	12.9062	1160.38	712.934	728.633	47.8146	867.314	-4.17826	5.90033e-13	6.12084e-11
LOC105610139	25.6554	59.748	27.798	520.918	288.83	832.544	37.7338	547.431	-3.85909	6.21362e-13	6.38698e-11
TNFRSF18	31.4486	40.1432	15.8846	423.042	393.942	201.563	29.1588	339.516	-3.53927	6.75644e-13	6.88209e-11
MATK	11.5863	12.1363	6.94951	123.976	92.3158	106.415	10.224	107.569	-3.38673	7.28916e-13	7.39127e-11
TRPV6	8.27593	18.6713	4.96393	118.539	277.861	215.335	10.637	203.912	-4.26036	7.41046e-13	7.48057e-11
DYNLRB2	92.6905	89.622	34.7475	2125	1012.73	602.186	72.3533	1246.64	-4.10527	7.86109e-13	7.86493e-11
EPS8L1	14.8967	10.2692	12.9062	101.139	142.587	107.667	12.6907	117.131	-3.20426	8.5365e-13	8.46542e-11
ADAMTS12	326.072	319.278	564.896	28.2753	37.4747	7.51168	403.415	24.4206	4.02988	8.8081e-13	8.65848e-11
PIH1D3	14.0691	20.5384	4.96393	797.146	240.387	195.304	13.1905	410.946	-4.9573	9.96769e-13	9.67167e-11
MUC1	12.4139	8.40206	22.8341	257.74	147.157	151.486	14.55	185.461	-3.67923	1.21315e-12	1.15717e-10
LOC101116390	225.105	229.656	459.66	25.0128	38.3887	32.5506	304.807	31.984	3.24882	1.22612e-12	1.16461e-10
MUSTN1	645.523	360.355	255.146	7118.85	2924.86	4031.27	420.341	4691.66	-3.47991	1.2958e-12	1.22049e-10
LOC101116795	18.2071	4.66781	29.7836	209.89	587.713	459.464	17.5528	419.022	-4.58057	1.32681e-12	1.24449e-10
LOC101110941	54.6212	46.6781	69.4951	667.732	289.744	922.685	56.9315	626.72	-3.46054	1.52231e-12	1.41024e-10
LOC101115805	8237.04	10783.6	32341	890.672	1527.32	971.51	17120.5	1129.84	3.92137	1.88623e-12	1.71214e-10
PAG1	298.761	760.853	488.451	35.8879	62.1532	60.0934	516.022	52.7115	3.29048	1.93771e-12	1.7518e-10
ANPEP	219.312	167.108	145.94	1368.09	2488.87	901.401	177.453	1586.12	-3.1597	2.02888e-12	1.81987e-10
-	499.866	529.33	201.536	18.4877	35.6467	42.5662	410.244	32.2335	3.67248	2.13796e-12	1.87267e-10
SAXO2	17.3795	15.8706	14.8918	185.965	147.157	98.9038	16.0473	144.008	-3.16496	2.31446e-12	2.00387e-10
LOC105607702	1030.35	1489.03	376.266	26.1003	69.4653	68.8571	965.217	54.8076	4.13831	2.32996e-12	2.00957e-10
CHRNA2	266.485	309.943	322.656	3.26254	3.65607	25.0389	299.695	10.6525	4.85346	2.39098e-12	2.05433e-10
LOC101122142	118.346	220.321	1404.79	6.52507	4.57009	12.5195	581.153	7.87154	6.2223	2.51977e-12	2.14858e-10
AQP4	8.27593	14.937	2.97836	324.079	143.501	131.454	8.73043	199.678	-4.51049	2.60246e-12	2.21072e-10
C6H4orf22	0.827593	2.80069	2.97836	138.114	69.4653	65.1012	2.20221	90.8935	-5.39875	3.18451e-12	2.67487e-10
RASSF6	0	0	0	121.801	63.0672	80.1246	0	88.331	-9.03423	3.93908e-12	3.21277e-10
MKI67	2664.85	6285.68	6886.96	10.8751	34.7327	214.083	5279.16	86.5635	5.93398	4.40277e-12	3.49974e-10
APLNR	146.484	189.513	652.261	17.4002	10.0542	13.7714	329.419	13.7419	4.58746	4.41529e-12	3.49974e-10
SPDEF	0	0.933563	0	170.739	151.727	100.156	0.311188	140.874	-8.74796	5.19971e-12	4.09268e-10
LOC101117414	665.385	541.466	480.509	5920.42	2456.88	9026.53	562.453	5801.28	-3.36633	5.49559e-12	4.28066e-10
LAMC2	56.2764	60.6816	14.8918	409.992	601.424	807.505	43.9499	606.307	-3.7826	5.90875e-12	4.5552e-10
EVPL	6.62075	4.66781	6.94951	53.2881	188.288	191.548	6.07936	144.375	-4.56943	6.45889e-12	4.92868e-10
SLITRK4	123.311	126.965	83.3941	13.0501	5.4841	6.25973	111.223	8.26466	3.75652	6.5895e-12	5.01136e-10
-	962.491	1283.65	2801.64	181.615	94.1438	182.784	1682.59	152.848	3.46206	6.81487e-12	5.1653e-10
C15H11orf88	0	0	0	302.328	98.7139	43.8181	0	148.287	-9.78286	7.05615e-12	5.33024e-10
ADGRF5	898.766	672.165	1806.87	150.077	103.284	137.714	1125.93	130.358	3.1115	7.2985e-12	5.49487e-10
RHPN2	50.4832	31.7411	24.8197	195.752	340.929	358.057	35.6813	298.246	-3.05778	8.06545e-12	5.99212e-10
PLA2G10	0	0.933563	0.992787	155.514	85.9176	141.47	0.642116	127.634	-7.7027	8.27815e-12	6.10981e-10
ADGB	2.48278	0.933563	0	184.877	65.8093	81.3765	1.13878	110.688	-6.53166	8.89423e-12	6.52176e-10
LOC101116587	110.898	263.265	90.3436	972.236	4095.71	7338.91	154.835	4135.62	-4.7393	8.9264e-12	6.52409e-10
AGR2	0	0	0	167.477	67.6373	60.0934	0	98.4025	-9.19098	9.11026e-12	6.61552e-10
DPP4	114.208	82.1535	52.6177	443.705	1050.21	1522.37	82.993	1005.43	-3.59675	9.20906e-12	6.66576e-10
ADIRF	17.3795	21.4719	11.9134	220.765	106.94	166.509	16.9216	164.738	-3.279	1.05059e-11	7.43707e-10
C3H2orf50	0	1.86713	2.97836	177.264	74.9494	66.3532	1.61516	106.189	-6.09643	1.12116e-11	7.86242e-10
LOC106991846	52.1384	150.304	135.019	4.35005	4.57009	5.00779	112.487	4.64264	4.60078	1.14049e-11	7.92391e-10
FBXO2	14.0691	13.0699	9.92787	109.839	159.039	87.6363	12.3556	118.838	-3.2637	1.26395e-11	8.70113e-10
HS2ST1	446.073	491.987	852.804	40.238	83.1756	88.8882	596.955	70.7672	3.07663	1.3018e-11	8.9344e-10
ERBB3	91.8629	127.898	42.6898	562.244	888.425	1151.79	87.4836	867.487	-3.3085	1.42176e-11	9.64015e-10
FFAR4	5.79315	9.33563	2.97836	179.44	91.4017	77.6207	6.03571	116.154	-4.26131	1.48071e-11	9.92031e-10
PLCXD3	201.933	332.348	734.662	27.1878	38.3887	33.8026	422.981	33.1264	3.6724	1.56212e-11	1.04038e-09
GPR21	75.311	96.1569	98.2859	8.7001	10.0542	7.51168	89.9179	8.75532	3.34797	1.63702e-11	1.08385e-09
RAPH1	854.076	646.025	1667.88	68.5133	119.736	143.974	1055.99	110.741	3.25406	1.75347e-11	1.15416e-09
SLC7A5	954.215	565.739	1254.88	36.9754	127.048	76.3687	924.946	80.1309	3.52566	1.77026e-11	1.16181e-09
CMKLR1	154.76	272.6	1290.62	14.1377	12.7962	22.535	572.661	16.4896	5.12411	1.94749e-11	1.27008e-09
C15H11orf52	0	0	1.98557	96.7886	114.252	113.927	0.661858	108.323	-7.46496	1.99423e-11	1.29372e-09
KIAA2012	11.5863	11.2028	12.9062	201.19	83.1756	121.439	11.8984	135.268	-3.50722	2.06554e-11	1.3285e-09
CCDC173	9.93112	11.2028	2.97836	351.266	118.822	110.171	8.03741	193.42	-4.57953	2.12717e-11	1.35651e-09
FAM81B	0	0	0	162.039	64.8952	51.3298	0	92.7548	-9.10588	2.27388e-11	1.44597e-09
HYDIN	35.5865	25.2062	7.94229	474.155	291.572	219.091	22.9117	328.273	-3.83305	2.52766e-11	1.59832e-09
DTHD1	0	0	0	142.464	62.1532	52.5818	0	85.733	-8.99227	2.54319e-11	1.59915e-09
STMN3	25.6554	10.2692	4.96393	237.078	217.536	158.997	13.6295	204.537	-3.89149	2.59115e-11	1.62113e-09
KRTDAP	0	0	0.992787	142.464	389.371	65.1012	0.330929	198.979	-9.24661	2.59255e-11	1.62113e-09
CRYM	129.105	31.7411	10.9207	1152.76	2042.83	1993.1	57.2555	1729.56	-4.91306	2.73457e-11	1.70521e-09
-	0	2.80069	0.992787	80.4759	79.5195	60.0934	1.26449	73.363	-5.90284	3.03076e-11	1.86919e-09
LOC105608279	15.7243	14.937	6.94951	119.626	95.9718	128.95	12.5369	114.85	-3.18372	3.05873e-11	1.88129e-09
PLEKHB1	127.449	60.6816	32.762	629.67	1127.9	781.215	73.631	846.261	-3.51947	3.34898e-11	2.03204e-09
CFAP43	26.483	9.33563	4.96393	479.593	213.88	182.784	13.5942	292.086	-4.41161	3.43298e-11	2.07185e-09
LOC101109268	2.48278	3.73425	4.96393	64.1632	172.749	63.8493	3.72699	100.254	-4.76767	3.91623e-11	2.32608e-09
SV2A	406.348	506.924	255.146	20.6627	42.9588	60.0934	389.473	41.2383	3.24381	4.2004e-11	2.4688e-09
SLCO2A1	848.283	1065.19	4074.4	147.902	121.564	96.3999	1995.96	121.955	4.03206	4.22149e-11	2.47474e-09
SERPINB5	5.79315	11.2028	19.8557	135.939	127.048	121.439	12.2839	128.142	-3.39947	4.42009e-11	2.57108e-09
ROPN1L	43.8625	15.8706	9.92787	697.095	341.843	244.13	23.2203	427.689	-4.19476	4.63978e-11	2.67811e-09
LOC101122934	0	0	0	113.101	71.2934	42.5662	0	75.6536	-8.81285	4.67746e-11	2.69295e-09
WHSC1	1412.7	2988.33	1433.58	94.6136	252.269	241.626	1944.87	196.169	3.30933	5.04971e-11	2.89247e-09
TGM3	1.65519	2.80069	3.97115	110.926	69.4653	47.574	2.80901	75.9885	-4.78111	5.745e-11	3.2658e-09
LOC105613322	206.071	138.167	280.959	13.0501	18.2803	32.5506	208.399	21.2937	3.30257	6.08452e-11	3.43353e-09
PEG10	4291.07	5353.05	9836.53	334.954	857.348	867.599	6493.55	686.634	3.24137	7.06344e-11	3.93577e-09
ARHGEF16	7.44834	5.60138	7.94229	51.1131	177.319	146.478	6.99734	124.97	-4.1595	7.45585e-11	4.14416e-09
COL4A1	19442.7	24642.3	80503.1	3196.2	2839.85	4028.76	41529.4	3354.94	3.6298	7.59705e-11	4.21225e-09
LOC101114042	0	0	1.98557	182.702	51.185	222.846	0.661858	152.244	-7.94202	8.83381e-11	4.85528e-09
LOC101116326	40.5521	42.0103	10.9207	465.455	261.409	329.262	31.161	352.042	-3.49284	8.99616e-11	4.92732e-09
PACRG	5.79315	5.60138	0.992787	179.44	81.3476	65.1012	4.12911	108.629	-4.69727	9.93544e-11	5.36347e-09
LOC106991901	4.96556	0	0	222.94	83.1756	86.3843	1.65519	130.833	-6.22443	1.0296e-10	5.53156e-09
WFIKKN2	181.243	183.912	46.661	1498.59	1747.6	1139.27	137.272	1461.82	-3.41152	1.04249e-10	5.58749e-09
LOC105602103	94.3457	74.685	155.868	5.43756	10.0542	10.0156	108.299	8.50244	3.66872	1.06364e-10	5.6873e-09
RAMP1	16.5519	25.2062	1.98557	353.441	233.988	249.137	14.5812	278.856	-4.25108	1.126e-10	5.99227e-09
LOC101122545	10.7587	0.933563	10.9207	93.526	193.772	242.878	7.53764	176.725	-4.54771	1.15981e-10	6.14318e-09
LOC101105114	1.65519	0.933563	0	128.326	63.0672	61.3454	0.862916	84.2463	-6.54319	1.20983e-10	6.37808e-09
LRRIQ1	8.27593	10.2692	0	580.732	213.88	110.171	6.18171	301.594	-5.5969	1.29342e-10	6.73986e-09
BNC1	19.0346	68.1501	10.9207	311.028	1023.7	950.227	32.7018	761.652	-4.54194	1.31519e-10	6.83749e-09
-	1.65519	6.53494	3.97115	110.926	46.6149	150.234	4.05376	102.592	-4.6742	1.55536e-10	7.99377e-09
ENTPD3	3.31037	8.40206	0.992787	170.739	114.252	58.8415	4.23507	114.611	-4.75495	1.59266e-10	8.14827e-09
LOC106991588	0.827593	0	0	126.151	78.6055	82.6285	0.275864	95.7951	-8.19007	1.63532e-10	8.32864e-09
LOC101106541	0.827593	0.933563	0	139.202	85.9176	70.109	0.587052	98.4094	-7.34364	1.67127e-10	8.48585e-09
WNT10A	1.65519	7.4685	3.97115	51.1131	222.106	116.431	4.36494	129.883	-4.91001	1.67749e-10	8.48585e-09
C8H6orf118	0	0	0	106.576	56.6691	38.8103	0	67.3519	-8.64476	1.75023e-10	8.81418e-09
PELI3	14.8967	13.0699	21.8413	207.715	241.301	86.3843	16.6026	178.467	-3.43196	1.79105e-10	8.9796e-09
DNAH14	24.0002	42.0103	18.8629	423.042	153.555	792.482	28.2912	456.36	-4.01064	1.83057e-10	9.15732e-09
FAM92B	6.62075	1.86713	2.97836	103.314	80.4335	51.3298	3.82208	78.359	-4.33361	1.8535e-10	9.25149e-09
AQP5	0.827593	0.933563	0	107.664	97.7999	66.3532	0.587052	90.6056	-7.2249	1.93544e-10	9.59665e-09
GAS2L2	0.827593	0.933563	0	142.464	118.822	55.0856	0.587052	105.457	-7.44564	1.98728e-10	9.81046e-09
C15H11orf97	2.48278	0.933563	0	108.751	98.7139	40.0623	1.13878	82.5091	-6.11078	1.99556e-10	9.82975e-09
SLC7A1	2304.85	1222.03	653.254	55.4631	109.682	169.013	1393.38	111.386	3.64665	2.04488e-10	1.00507e-08
SHANK3	390.624	482.652	1176.45	71.7758	86.8317	76.3687	683.243	78.3254	3.12369	2.18597e-10	1.06743e-08
PRSS8	0.827593	2.80069	3.97115	46.763	84.0896	65.1012	2.53314	65.3179	-4.72654	2.23767e-10	1.09031e-08
FRK	2.48278	0.933563	1.98557	166.389	65.8093	41.3142	1.80064	91.171	-5.65091	2.29565e-10	1.11614e-08
BTLA	0.827593	0.933563	3.97115	145.727	180.975	30.0467	1.91077	118.916	-5.99799	2.43148e-10	1.17457e-08
IRF6	48.828	42.0103	14.8918	326.254	277.861	259.153	35.2434	287.756	-3.02375	2.54314e-10	1.21547e-08
SMOC2	155.588	191.38	64.5311	874.36	1718.35	966.503	137.166	1186.41	-3.11196	3.17654e-10	1.48888e-08
KRT222	1.65519	2.80069	5.95672	63.0757	106.94	52.5818	3.47086	74.1992	-4.45013	3.20307e-10	1.49594e-08
LOC101103097	5351.22	3819.2	4067.45	46180.1	15297.9	65088.7	4412.62	42188.9	-3.25713	3.58693e-10	1.65462e-08
SLC2A12	24.8278	33.6083	17.8702	346.916	172.749	150.234	25.4354	223.3	-3.13284	3.67569e-10	1.69209e-08
LOC105604991	10.7587	8.40206	8.93508	151.164	75.8635	75.1168	9.36529	100.715	-3.42303	3.75141e-10	1.72343e-08
ST14	63.7247	18.6713	20.8485	233.815	705.622	543.345	34.4148	494.26	-3.83882	4.22639e-10	1.92592e-08
TACR1	11.5863	13.0699	1.98557	221.852	158.125	86.3843	8.88059	155.454	-4.11908	4.44583e-10	2.00964e-08
COL11A1	1270.36	1594.52	4034.69	229.465	291.572	306.727	2299.86	275.921	3.05918	4.89053e-10	2.17996e-08
ADAMTS17	1457.39	2179.87	570.852	71.7758	146.243	167.761	1402.7	128.593	3.44781	4.97295e-10	2.20366e-08
CLSTN3	51.3108	58.8144	72.4734	333.866	944.18	344.285	60.8662	540.777	-3.15341	5.25543e-10	2.29718e-08
LOC105614720	67.8627	104.559	18.8629	1117.96	649.866	624.721	63.7615	797.517	-3.64335	6.09173e-10	2.61202e-08
CHST11	406.348	754.319	435.833	23.9253	65.8093	82.6285	532.167	57.4543	3.21319	6.16386e-10	2.63792e-08
FOXM1	268.968	684.301	434.841	18.4877	35.6467	68.8571	462.703	40.9971	3.50273	6.46409e-10	2.76116e-08
LOC105610334	4.96556	8.40206	1.98557	50.0256	105.112	177.776	5.11773	110.971	-4.43046	7.16416e-10	3.03493e-08
CCDC39	35.5865	58.8144	17.8702	868.922	426.846	229.106	37.4237	508.292	-3.7627	7.45466e-10	3.14255e-08
VILL	9.93112	18.6713	19.8557	85.9135	157.211	179.028	16.1527	140.718	-3.13021	8.76069e-10	3.65885e-08
LOC101121655	19.8622	34.5418	12.9062	255.565	249.527	121.439	22.4368	208.844	-3.21857	8.79747e-10	3.66741e-08
LOC105611150	78.6214	87.7549	60.56	2.17502	8.22616	2.50389	75.6454	4.30169	4.07993	9.06709e-10	3.75201e-08
WDR66	8.27593	10.2692	3.97115	82.6509	64.8952	78.8726	7.50542	75.4729	-3.31962	9.67308e-10	3.98082e-08
LOC101107359	206.071	193.247	21.8413	3.26254	1.82803	2.50389	140.387	2.53149	5.80522	1.02456e-09	4.18584e-08
TCTEX1D1	0.827593	0	0	185.965	83.1756	45.0701	0.275864	104.737	-8.3198	1.11178e-09	4.49703e-08
CLGN	46.3452	136.3	31.7692	1355.04	1076.71	485.755	71.4715	972.503	-3.76656	1.1144e-09	4.49703e-08
TMPPE	124.139	217.52	368.324	11.9626	29.2486	7.51168	236.661	16.241	3.84359	1.12074e-09	4.50519e-08
LOC101122753	0	0.933563	0	105.489	76.7775	53.8337	0.311188	78.6999	-7.90799	1.21257e-09	4.8294e-08
LOC106991125	125.794	71.8843	92.3292	4.35005	12.7962	8.76363	96.6692	8.63664	3.46922	1.21385e-09	4.8294e-08
FAM83B	0	0.933563	0	61.9882	76.7775	77.6207	0.311188	72.1288	-7.78089	1.21616e-09	4.8294e-08
CD300LG	180.415	96.1569	219.406	8.7001	23.7645	16.2753	165.326	16.2466	3.33709	1.21641e-09	4.8294e-08
C2	137.381	68.1501	34.7475	516.568	835.412	916.425	80.0927	756.135	-3.23572	1.26553e-09	4.96624e-08
LOC101111988	9.93112	26.1398	7.94229	971.148	574.003	58.8415	14.6711	534.664	-5.18833	1.26633e-09	4.96624e-08
LOC101118607	9.93112	11.2028	7.94229	143.552	53.927	235.366	9.69206	144.282	-3.89123	1.33106e-09	5.19829e-08
FGF9	14.8967	20.5384	19.8557	81.5634	254.097	444.441	18.4303	260.034	-3.81983	1.345e-09	5.22021e-08
CDH5	1634.5	1431.15	4474.49	308.853	151.727	317.994	2513.38	259.525	3.27656	1.38405e-09	5.34416e-08
CBLC	0.827593	1.86713	0.992787	60.9007	97.7999	35.0545	1.22917	64.585	-5.73001	1.40827e-09	5.41908e-08
LOC101122718	279.727	465.848	741.612	21.7502	75.8635	42.5662	495.729	46.7266	3.40156	1.43485e-09	5.49316e-08
NME5	3.31037	2.80069	0	192.49	55.7551	50.0779	2.03702	99.4409	-5.57485	1.45234e-09	5.55071e-08
LOC101112471	21.5174	26.1398	16.8774	188.14	95.0578	250.389	21.5115	177.862	-3.04376	1.56435e-09	5.92847e-08
NAV2	2375.19	1800.84	663.182	92.4385	224.848	175.273	1613.07	164.186	3.29581	1.61691e-09	6.07343e-08
HOXA3	6.62075	16.8041	2.97836	126.151	97.7999	111.423	8.80108	111.792	-3.66467	1.72185e-09	6.41733e-08
C1H21orf62	3.31037	3.73425	9.92787	50.0256	100.542	107.667	5.6575	86.0783	-3.94697	1.81232e-09	6.7322e-08
DNAH2	6.62075	5.60138	11.9134	85.9135	66.7233	70.109	8.04519	74.2486	-3.21679	1.87621e-09	6.95804e-08
DNAJB13	0.827593	0	1.98557	202.277	50.271	46.322	0.937722	99.6234	-6.7592	1.99136e-09	7.34696e-08
LOC105616742	7575.79	7676.69	5552.66	430.655	1497.16	525.818	6935.04	817.878	3.08333	2.25009e-09	8.22269e-08
KLC3	6.62075	15.8706	3.97115	76.1259	125.22	111.423	8.82082	104.256	-3.56284	2.31949e-09	8.42692e-08
VGLL1	0	0	0	20.6627	92.3158	61.3454	0	58.108	-8.43258	2.66617e-09	9.57229e-08
LOC101119591	0	0	0	55.4631	42.9588	31.2987	0	43.2402	-8.00604	2.79955e-09	1.00192e-07
-	390.624	387.428	197.565	9.78761	49.3569	18.7792	325.206	25.9746	3.63354	2.8683e-09	1.02165e-07
CA11	116.691	80.2864	62.5456	1222.36	1364.63	289.2	86.5075	958.73	-3.46944	3.27717e-09	1.15135e-07
APOBEC4	3.31037	2.80069	0	241.428	55.7551	45.0701	2.03702	114.084	-5.77588	3.28358e-09	1.15135e-07
C1H2orf54	0	0	0	31.5379	36.5607	71.3609	0	46.4865	-8.10542	3.32868e-09	1.16174e-07
CKB	241.657	185.779	220.399	3057	1601.36	739.9	215.945	1799.42	-3.05877	3.34747e-09	1.16468e-07
CLEC4E	4.13797	1.86713	3.97115	90.2635	48.4429	43.8181	3.32541	60.8415	-4.18904	3.73325e-09	1.29093e-07
-	2.48278	2.80069	0.992787	44.588	107.854	40.0623	2.09208	64.1681	-4.92751	3.77126e-09	1.30207e-07
DNAAF1	0.827593	0.933563	0.992787	68.5133	72.2074	33.8026	0.917981	58.1744	-5.99595	3.79962e-09	1.30985e-07
LOC101117443	4.96556	16.8041	15.8846	170.739	219.364	77.6207	12.5514	155.908	-3.6468	3.86681e-09	1.32692e-07
EXOC3L2	153.932	244.593	859.753	21.7502	11.8822	36.3064	419.426	23.313	4.17832	3.90813e-09	1.33906e-07
-	111.725	108.293	54.6033	10.8751	6.39812	10.0156	91.5405	9.09627	3.34553	3.98104e-09	1.3599e-07
KCNRG	17.3795	16.8041	12.9062	550.281	148.071	93.896	15.6966	264.083	-4.07083	3.99965e-09	1.36418e-07
LOC101117760	12.4139	14.937	16.8774	251.215	59.4111	743.656	14.7428	351.428	-4.57582	4.82453e-09	1.62582e-07
LOC106990950	13.2415	17.7377	9.92787	122.889	70.3793	189.044	13.6357	127.437	-3.21939	4.83766e-09	1.62781e-07
IGSF5	0	0	0	51.1131	53.013	25.0389	0	43.055	-8.00167	5.00808e-09	1.68013e-07
LOC101116593	25.6554	31.7411	7.94229	402.38	280.603	125.195	21.7796	269.393	-3.62515	5.29738e-09	1.76928e-07
SHROOM3	133.243	204.45	103.25	493.731	1603.19	1573.7	146.981	1223.54	-3.05725	5.35764e-09	1.78411e-07
ESAM	295.451	291.272	917.335	68.5133	50.271	38.8103	501.352	52.5315	3.25279	5.44806e-09	1.80887e-07
ST8SIA5	211.036	314.611	914.357	3.26254	15.5383	38.8103	480.001	19.2037	4.65363	5.59097e-09	1.8524e-07
C2CD4D	1.65519	3.73425	0	53.2881	50.271	47.574	1.79648	50.3777	-4.79317	5.92195e-09	1.94045e-07
PVALB	30.621	77.4857	16.8774	1087.51	501.796	275.428	41.6613	621.579	-3.89906	6.15329e-09	2.00749e-07
SCN9A	373.245	344.485	306.771	10.8751	30.1626	62.5973	341.5	34.545	3.31408	6.31973e-09	2.04402e-07
AGR3	0	0	0	45.6755	31.9906	36.3064	0	37.9909	-7.817	6.75752e-09	2.17312e-07
-	432.831	96.1569	1075.19	26.1003	9.14017	31.2987	534.725	22.1797	4.5991	6.82171e-09	2.19063e-07
C12H1orf106	2.48278	3.73425	5.95672	26.1003	124.306	171.517	4.05792	107.308	-4.73806	7.06517e-09	2.25275e-07
-	16.5519	16.8041	5.95672	85.9135	131.619	105.164	13.1042	107.565	-3.02866	7.08153e-09	2.25477e-07
LOC105608584	29.7934	9.33563	5.95672	244.69	255.011	115.179	15.0286	204.96	-3.75716	7.55818e-09	2.393e-07
LOC101122127	212.692	234.324	78.4302	1407.24	834.498	2368.68	175.149	1536.81	-3.13233	7.95767e-09	2.50189e-07
RPS26	238.347	252.995	248.197	1879.22	813.476	4121.41	246.513	2271.37	-3.20362	8.08047e-09	2.53342e-07
CLDN3	2.48278	7.4685	18.8629	126.151	159.953	103.912	9.60474	130.005	-3.7793	8.20964e-09	2.57034e-07
LOC101114032	0	0	0	118.539	65.8093	12.5195	0	65.6225	-8.60791	8.4756e-09	2.64258e-07
CFAP74	0	1.86713	0.992787	79.3884	41.1308	46.322	0.953304	55.6137	-5.91466	8.66416e-09	2.69019e-07
CALY	6.62075	17.7377	3.97115	118.539	158.125	76.3687	9.44319	117.678	-3.64124	8.83243e-09	2.73114e-07
MORN5	9.10353	10.2692	6.94951	262.09	80.4335	62.5973	8.77407	135.04	-3.94195	9.33379e-09	2.85868e-07
SLC39A14	9404.77	9191.86	3085.58	556.806	829.928	1317.05	7227.4	901.261	3.00372	9.47853e-09	2.89513e-07
-	0	0	0	68.5133	35.6467	25.0389	0	43.0663	-7.99973	9.60443e-09	2.92961e-07
LOC101121333	87.7249	86.8213	175.723	9.78761	11.8822	18.7792	116.756	13.483	3.12494	9.67381e-09	2.94678e-07
CLDN4	6.62075	3.73425	11.9134	63.0757	80.4335	71.3609	7.42281	71.6234	-3.28161	9.76957e-09	2.97193e-07
LOC105616751	0	0	0	52.2006	11.8822	171.517	0	78.5332	-8.86257	9.91676e-09	3.00049e-07
KNG1	0.827593	0	0	82.6509	37.4747	70.109	0.275864	63.4115	-7.59265	1.02327e-08	3.08365e-07
LOC101105809	72.8282	69.0836	275.002	8.7001	9.14017	7.51168	138.971	8.45065	4.03397	1.10318e-08	3.30674e-07
PTGER3	0	2.80069	9.92787	59.8132	183.718	158.997	4.24285	134.176	-5.01596	1.1932e-08	3.53887e-07
SPECC1	1109.8	1168.82	376.266	72.8633	95.0578	160.249	884.963	109.39	3.0184	1.23864e-08	3.66399e-07
PSD	595.867	759.92	187.637	6365.21	3568.32	3316.41	514.475	4416.65	-3.10155	1.27156e-08	3.75153e-07
LOC105611475	53.7936	75.6186	76.4446	3.26254	8.22616	8.76363	68.6189	6.75077	3.34527	1.32693e-08	3.90465e-07
DMKN	4.13797	2.80069	11.9134	140.289	457.923	38.8103	6.28403	212.341	-5.09061	1.32898e-08	3.90557e-07
ZNF474	0	0.933563	0.992787	57.6381	63.9812	47.574	0.642116	56.3978	-6.52662	1.33704e-08	3.91394e-07
ATP2B2	1.65519	1.86713	0	47.8505	36.5607	55.0856	1.1741	46.499	-5.2647	1.37319e-08	3.99894e-07
-	84.4145	140.968	231.319	0	1.82803	12.5195	152.234	4.7825	5.04858	1.37624e-08	4.00002e-07
LOC101112474	10.7587	10.2692	7.94229	115.276	56.6691	72.6129	9.65673	81.5194	-3.07185	1.38264e-08	4.0109e-07
-	404.693	97.0905	1121.85	5.43756	35.6467	10.0156	541.211	17.0333	4.97731	1.50804e-08	4.33555e-07
-	13.2415	26.1398	4.96393	240.34	97.7999	197.808	14.7817	178.649	-3.59147	1.5463e-08	4.42296e-07
TRPC5	46.3452	42.0103	161.824	0	1.82803	1.25195	83.3933	1.02666	6.30437	1.59534e-08	4.54017e-07
LOC106990163	0.827593	0	0	187.052	60.3252	26.2909	0.275864	91.2227	-8.12035	1.69385e-08	4.79565e-07
-	19.8622	12.1363	5.95672	119.626	128.876	78.8726	12.6518	109.125	-3.09646	1.69576e-08	4.79565e-07
-	4.13797	1.86713	0.992787	40.238	52.099	46.322	2.33263	46.2197	-4.27009	1.78605e-08	5.03202e-07
CLSPN	321.934	737.514	732.677	23.9253	38.3887	106.415	597.375	56.2432	3.41498	1.83827e-08	5.15976e-07
LOC106991377	111.725	163.373	23.8269	2.17502	0.914017	5.00779	99.6418	2.69894	5.26422	1.86454e-08	5.21399e-07
-	136.553	132.566	69.4951	787.359	464.321	2008.12	112.871	1086.6	-3.26585	1.87547e-08	5.23642e-07
CCDC181	7.44834	17.7377	7.94229	165.302	118.822	61.3454	11.0428	115.157	-3.38672	1.98356e-08	5.51258e-07
B4GALT5	509.798	425.705	1416.71	68.5133	127.048	86.3843	784.07	93.982	3.05854	2.04705e-08	5.65414e-07
LOC101106386	0	1.86713	0	107.664	49.3569	45.0701	0.622375	67.3636	-6.7841	2.16159e-08	5.94135e-07
LOC101109556	15.7243	7.4685	11.9134	95.7011	63.9812	153.989	11.7021	104.557	-3.15037	2.20684e-08	6.05094e-07
CERS4	162.208	154.038	34.7475	1153.85	919.502	896.394	116.998	989.915	-3.07931	2.32088e-08	6.32509e-07
LOC101119182	4.96556	3.73425	0.992787	66.3382	307.11	30.0467	3.23087	134.498	-5.364	2.3845e-08	6.46717e-07
LOC106991509	83.5869	128.832	94.3147	4.35005	9.14017	18.7792	102.244	10.7565	3.27069	2.39704e-08	6.48555e-07
IQGAP3	184.553	528.396	532.134	8.7001	19.1944	57.5895	415.028	28.4947	3.87455	2.48226e-08	6.68398e-07
LRRC6	4.13797	0.933563	0	175.089	60.3252	32.5506	1.69051	89.3217	-5.66615	2.55964e-08	6.85954e-07
PLXNA4	1288.56	346.352	1712.56	141.377	84.0896	135.21	1115.82	120.225	3.21546	2.56414e-08	6.86341e-07
AIM1L	4.96556	10.2692	0.992787	70.6883	125.22	62.5973	5.40918	86.1687	-3.98864	2.63251e-08	7.01997e-07
-	105.932	323.013	1457.41	21.7502	31.0766	32.5506	628.785	28.4591	4.46556	2.6351e-08	7.01997e-07
LOC105609741	4.96556	8.40206	0	172.914	111.51	48.8259	4.45587	111.083	-4.62835	2.76137e-08	7.29804e-07
PROM2	0	4.66781	0	46.763	137.103	58.8415	1.55594	80.9024	-5.71876	2.76217e-08	7.29804e-07
LOC105609280	32.2761	34.5418	3.97115	222.94	519.162	267.917	23.5964	336.673	-3.83032	2.7754e-08	7.32439e-07
C2H9orf135	0	0	0	96.7886	32.9046	17.5273	0	49.0735	-8.18789	2.85511e-08	7.49959e-07
LOC101119832	6.62075	9.33563	4.96393	105.489	48.4429	61.3454	6.97344	71.759	-3.35982	2.87931e-08	7.53676e-07
MATN4	0	2.80069	0	43.5005	127.048	41.3142	0.933563	70.6211	-6.26574	2.88371e-08	7.53952e-07
LOC105602254	3.31037	1.86713	0.992787	116.364	31.9906	42.5662	2.05676	63.6402	-4.92265	2.95796e-08	7.68898e-07
LOC101119090	30.621	38.2761	22.8341	302.328	102.37	403.127	30.577	269.275	-3.13604	2.97903e-08	7.72592e-07
TTC34	0	0	0	21.7502	44.7869	36.3064	0	34.2812	-7.6711	3.27192e-08	8.42724e-07
LOC106990174	2.48278	7.4685	16.8774	66.3382	169.093	147.73	8.94289	127.72	-3.85419	3.55907e-08	9.10433e-07
LOC105611980	5.79315	6.53494	2.97836	64.1632	37.4747	83.8804	5.10215	61.8394	-3.58567	3.73914e-08	9.50021e-07
P2RX2	0.827593	3.73425	0.992787	45.6755	46.6149	37.5584	1.85154	43.2829	-4.56151	3.75157e-08	9.52103e-07
-	462.625	709.508	2629.89	66.3382	150.813	81.3765	1267.34	99.5092	3.6689	3.7905e-08	9.5982e-07
LOC106990374	45.5176	134.433	37.7259	1.08751	0	2.50389	72.5588	1.19714	6.03915	3.89497e-08	9.84405e-07
KRT5	4.13797	0.933563	0.992787	89.176	93.2298	22.535	2.02144	68.3136	-5.04161	3.92344e-08	9.90141e-07
PFKFB3	787.869	440.642	250.182	11.9626	58.4971	56.3376	492.898	42.2658	3.54355	3.95165e-08	9.95028e-07
LOC101110133	73.6558	56.9473	166.788	3.26254	10.9682	2.50389	99.1304	5.57821	4.10648	3.97217e-08	9.99077e-07
VEGFA	517.246	818.734	2058.05	91.351	183.718	120.187	1131.34	131.752	3.10064	4.02345e-08	1.01085e-06
-	0	0	0	65.2507	35.6467	17.5273	0	39.4749	-7.87488	4.02861e-08	1.0109e-06
TMPRSS13	0	0.933563	1.98557	91.351	54.841	26.2909	0.973045	57.4943	-5.95395	4.10551e-08	1.02757e-06
SPINT1	10.7587	21.4719	59.5672	212.065	434.158	345.537	30.5993	330.587	-3.44036	4.10828e-08	1.02757e-06
LOC105603234	61.2419	48.5453	52.6177	0	0	3.75584	54.135	1.25195	5.61542	4.13543e-08	1.03207e-06
CUBN	48.0004	67.2165	123.106	5.43756	5.4841	10.0156	79.4408	6.97908	3.52691	4.26659e-08	1.05893e-06
SOWAHA	3.31037	3.73425	3.97115	65.2507	38.3887	40.0623	3.67192	47.9006	-3.70962	4.28361e-08	1.06199e-06
CPM	316.141	190.447	1868.42	40.238	28.3345	53.8337	791.671	40.8021	4.28073	4.31232e-08	1.06687e-06
IL20RB	14.0691	5.60138	1.98557	132.676	75.8635	80.1246	7.21868	96.2215	-3.71219	4.52172e-08	1.10881e-06
MOXD1	19.0346	75.6186	15.8846	221.852	508.194	837.552	36.8459	522.533	-3.82631	4.52682e-08	1.10885e-06
CCDC64B	0	0	0	17.4002	59.4111	36.3064	0	37.7059	-7.80973	4.68051e-08	1.14029e-06
CCDC113	0.827593	0	5.95672	143.552	43.8728	61.3454	2.26144	82.9233	-5.23754	4.73504e-08	1.15233e-06
LOC105605995	70.3454	67.2165	116.156	4.35005	13.7103	5.00779	84.5727	7.68937	3.42378	4.76314e-08	1.15667e-06
LOC101117044	0	0	0	38.0629	72.2074	15.0234	0	41.7646	-7.95928	4.87367e-08	1.17842e-06
LRRC34	16.5519	16.8041	18.8629	255.565	100.542	85.1324	17.4063	147.08	-3.08024	4.95415e-08	1.19387e-06
LOC106991661	62.8971	72.8179	35.7403	0	2.74205	0	57.1518	0.914017	5.79195	5.10945e-08	1.22621e-06
SH2D3A	19.0346	4.66781	11.9134	79.3884	106.94	121.439	11.872	102.589	-3.10097	5.6498e-08	1.33455e-06
LOC101120825	0	0	0	11.9626	45.7009	77.6207	0	45.0947	-8.06306	5.71891e-08	1.34805e-06
LOC105607573	78.6214	82.1535	127.077	3.26254	10.0542	16.2753	95.9505	9.86401	3.29635	6.05554e-08	1.41996e-06
GALNT10	533.798	503.19	1854.53	94.6136	144.415	101.408	963.838	113.479	3.08499	6.19701e-08	1.44893e-06
WNT7B	6.62075	0.933563	0	40.238	98.7139	100.156	2.5181	79.7025	-4.92876	6.19838e-08	1.44893e-06
PON3	3.31037	0.933563	1.98557	140.289	57.5831	21.2831	2.0765	73.0518	-5.11982	6.31046e-08	1.47055e-06
-	56.2764	66.2829	248.197	6.52507	7.31214	10.0156	123.585	7.95093	3.96427	6.43736e-08	1.49702e-06
LOC101122504	0	0.933563	0	127.239	40.2168	28.7948	0.311188	65.4168	-7.64041	6.7818e-08	1.5594e-06
PPARGC1B	425.383	745.916	2136.48	96.7886	136.189	132.706	1102.59	121.895	3.17689	7.05718e-08	1.61941e-06
LOC101113601	0	0	0	140.289	62.1532	5.00779	0	69.15	-8.68293	7.21578e-08	1.64741e-06
FOXF1	88.5525	60.6816	172.745	13.0501	13.7103	8.76363	107.326	11.8413	3.16934	7.25903e-08	1.6556e-06
NXPH4	9.10353	6.53494	10.9207	52.2006	104.198	61.3454	8.85304	72.5813	-3.04096	7.91119e-08	1.78446e-06
CFAP77	0	0	0	39.1504	44.7869	16.2753	0	33.4042	-7.63648	8.14252e-08	1.83296e-06
BPIFB1	0	0.933563	0	33.7129	43.8728	61.3454	0.311188	46.3104	-7.13947	8.29475e-08	1.86396e-06
LOC105604616	35.5865	28.0069	80.4157	547.019	182.803	509.542	48.003	413.121	-3.10739	8.40951e-08	1.88552e-06
INSRR	561.108	1167.89	827.984	14.1377	83.1756	120.187	852.326	72.5	3.55696	8.54829e-08	1.91283e-06
-	0.827593	0	0	78.3009	39.3028	32.5506	0.275864	50.0514	-7.25431	9.06385e-08	2.01847e-06
VWA3A	16.5519	11.2028	1.98557	169.652	95.9718	91.3921	9.9134	119.005	-3.56997	9.18638e-08	2.0394e-06
LOC105610161	8.27593	14.0034	5.95672	114.189	89.5737	48.8259	9.41203	84.1961	-3.16196	9.41132e-08	2.08317e-06
CDC20B	0.827593	0.933563	0	29.3628	62.1532	61.3454	0.587052	50.9538	-6.39553	9.45608e-08	2.09102e-06
LOC105606063	73.6558	82.1535	71.4806	6.52507	14.6243	3.75584	75.7633	8.30173	3.14958	9.56432e-08	2.11081e-06
LOC101112274	28.9658	29.874	11.9134	226.203	92.3158	353.049	23.5844	223.856	-3.24114	9.67773e-08	2.13112e-06
KIF26A	96.0008	82.1535	157.853	17.4002	10.9682	2.50389	112.002	10.2908	3.42609	9.68045e-08	2.13112e-06
TSPAN19	4.13797	3.73425	2.97836	132.676	33.8186	41.3142	3.61686	69.2698	-4.25304	1.00602e-07	2.20726e-06
LOC105613207	57.1039	16.8041	23.8269	545.931	312.594	147.73	32.5783	335.418	-3.35968	1.02422e-07	2.24282e-06
KIF18B	376.555	1058.66	719.77	8.7001	42.0448	96.3999	718.328	49.0483	3.87684	1.04119e-07	2.273e-06
LOC101113743	15.7243	16.8041	0.992787	148.989	142.587	131.454	11.1737	141.01	-3.64681	1.04121e-07	2.273e-06
STMND1	0.827593	0	2.97836	108.751	47.5289	25.0389	1.26865	60.4397	-5.6136	1.05577e-07	2.2985e-06
DSG2	23.1726	47.6117	1.98557	295.803	420.448	504.534	24.2566	406.929	-4.06601	1.07417e-07	2.33629e-06
LOC105603670	48.0004	69.0836	40.7043	0	0.914017	1.25195	52.5961	0.721988	6.20725	1.12718e-07	2.44214e-06
-	6.62075	17.7377	4.96393	175.089	139.845	51.3298	9.77412	122.088	-3.64522	1.12943e-07	2.44468e-06
LOC106990905	31.4486	53.2131	72.4734	3.26254	4.57009	2.50389	52.3783	3.44551	3.89774	1.16826e-07	2.52145e-06
SH3TC2	47.1728	66.2829	163.81	2.17502	9.14017	6.25973	92.4219	5.85831	3.96292	1.24036e-07	2.66174e-06
NTS	13.2415	5.60138	13.899	50.0256	338.186	121.439	10.914	169.884	-3.96129	1.25397e-07	2.68455e-06
DRC1	19.0346	15.8706	1.98557	232.728	113.338	120.187	12.2969	155.418	-3.64864	1.2556e-07	2.68455e-06
PVRL4	4.13797	5.60138	28.7908	94.6136	275.119	249.137	12.8434	206.29	-4.01795	1.25576e-07	2.68455e-06
-	3.31037	4.66781	1.98557	93.526	16.4523	170.265	3.32125	93.4144	-4.80628	1.273e-07	2.71161e-06
LOC101119878	7.44834	13.0699	18.8629	128.326	58.4971	261.657	13.1271	149.493	-3.51448	1.2757e-07	2.71174e-06
-	56.2764	47.6117	50.6321	2.17502	7.31214	2.50389	51.5067	3.99702	3.63601	1.28507e-07	2.7265e-06
-	5.79315	7.4685	1.98557	158.777	23.7645	132.706	5.08241	105.083	-4.3597	1.31685e-07	2.79129e-06
CKAP2	1050.22	2095.85	1800.92	72.8633	93.2298	349.293	1648.99	171.795	3.26527	1.35197e-07	2.85516e-06
-	0	0	0	23.9253	25.5925	32.5506	0	27.3561	-7.34224	1.35205e-07	2.85516e-06
HSD17B2	11.5863	3.73425	4.96393	41.3255	124.306	86.3843	6.7615	84.0054	-3.62047	1.35904e-07	2.86724e-06
KCNK3	62.0695	54.1466	263.088	7.61259	9.14017	7.51168	126.435	8.08815	3.96076	1.36724e-07	2.88182e-06
KLHDC7A	1.65519	7.4685	0.992787	33.7129	75.8635	93.896	3.37216	67.8241	-4.33292	1.43702e-07	3.00919e-06
LOC105611299	56.2764	30.8076	39.7115	2.17502	1.82803	1.25195	42.2651	1.75167	4.57837	1.48459e-07	3.09727e-06
ANKS4B	23.1726	2.80069	4.96393	169.652	95.9718	189.044	10.3124	151.556	-3.85891	1.50978e-07	3.14109e-06
-	104.277	189.513	597.658	19.5752	30.1626	30.0467	297.149	26.5948	3.48112	1.62705e-07	3.35531e-06
NRP1	8506.01	11183.1	8672.98	749.296	444.213	2267.28	9454.05	1153.59	3.03525	1.67256e-07	3.43172e-06
LOC101115564	27.3106	37.3425	225.363	3.26254	1.82803	2.50389	96.6719	2.53149	5.26374	1.69508e-07	3.4689e-06
CASC5	675.316	1475.03	1115.89	63.0757	78.6055	250.389	1088.75	130.69	3.06159	1.72567e-07	3.52509e-06
HAND2	59.5867	27.0733	5.95672	405.642	436.9	250.389	30.8723	364.311	-3.5546	1.76498e-07	3.5956e-06
-	38.0693	40.1432	38.7187	2.17502	2.74205	1.25195	38.9771	2.05634	4.20609	1.76798e-07	3.59847e-06
LOC101103150	7.44834	26.1398	6.94951	163.127	74.9494	225.35	13.5125	154.476	-3.51528	1.81325e-07	3.67731e-06
-	100.139	76.5521	91.3364	5.43756	19.1944	7.51168	89.3424	10.7145	3.03117	1.82892e-07	3.70242e-06
LOC105609947	30.621	79.3528	60.56	0	1.82803	5.00779	56.8446	2.27861	4.69816	1.87986e-07	3.79871e-06
LOC105616252	4.13797	4.66781	0	67.4258	46.6149	40.0623	2.93526	51.3676	-4.10251	1.89376e-07	3.81994e-06
RNASE12	1.65519	0	0	238.165	55.7551	15.0234	0.551729	102.981	-7.44682	1.9329e-07	3.88843e-06
LOC101112460	22.345	52.2795	123.106	0	1.82803	1.25195	65.91	1.02666	5.96587	1.94517e-07	3.90612e-06
LOC105606135	212.692	227.789	201.536	16.3127	51.185	11.2675	214.005	26.2551	3.00896	1.96317e-07	3.93319e-06
CLDN8	0	0	0	18.4877	32.9046	28.7948	0	26.729	-7.31165	2.3023e-07	4.53318e-06
-	28.9658	29.874	0.992787	331.691	306.196	274.176	19.9442	304.021	-3.92451	2.47884e-07	4.83545e-06
KCNK2	362.486	1025.05	1048.38	63.0757	63.0672	177.776	811.973	101.306	3.00613	2.52635e-07	4.91961e-06
LOC101104380	2.48278	2.80069	0.992787	27.1878	85.9176	33.8026	2.09208	48.9693	-4.53909	2.5471e-07	4.94848e-06
-	3.31037	6.53494	1.98557	42.413	94.1438	36.3064	3.94363	57.6211	-3.87125	2.61138e-07	5.05893e-06
-	3.31037	0.933563	0.992787	129.414	46.6149	18.7792	1.74557	64.936	-5.18483	2.70042e-07	5.20011e-06
TTR	2.48278	4.66781	2.97836	203.365	19.1944	57.5895	3.37632	93.3829	-4.79303	2.7082e-07	5.21063e-06
LIMD1	337.658	359.422	1499.11	60.9007	99.6279	76.3687	732.063	78.9658	3.2113	2.7614e-07	5.28588e-06
GALNTL5	0	0	0	11.9626	40.2168	41.3142	0	31.1645	-7.53199	2.8145e-07	5.37381e-06
-	42.2073	81.2199	37.7259	4.35005	5.4841	3.75584	53.7177	4.53	3.55262	2.84454e-07	5.41738e-06
RALGAPA2	1070.08	529.33	290.887	36.9754	103.284	93.896	630.098	78.0518	3.01284	2.85704e-07	5.43658e-06
HOXC11	0.827593	1.86713	0	41.3255	61.2392	23.787	0.89824	42.1172	-5.5379	2.91879e-07	5.54004e-06
-	103.449	152.171	708.85	21.7502	23.7645	28.7948	321.49	24.7698	3.69915	2.96738e-07	5.61334e-06
CLDN9	0	0	0	46.763	37.4747	11.2675	0	31.8351	-7.56625	3.00581e-07	5.66698e-06
FIGLA	8.27593	15.8706	2.97836	63.0757	234.902	82.6285	9.04162	126.869	-3.80928	3.04398e-07	5.73415e-06
LOC100037664	47.1728	55.0802	33.7547	351.266	126.134	614.706	45.3359	364.036	-3.00331	3.15777e-07	5.91877e-06
LOC105605733	96.0008	75.6186	30.7764	2.17502	7.31214	5.00779	67.4653	4.83165	3.7879	3.17149e-07	5.93462e-06
PLCXD2	252.416	280.069	327.62	13.0501	21.0224	68.8571	286.701	34.3099	3.07461	3.2426e-07	6.04757e-06
WDR78	7.44834	14.937	57.5816	604.657	232.16	245.382	26.6557	360.733	-3.76485	3.28771e-07	6.12663e-06
LOC101121082	67.8627	93.3563	157.853	3.26254	17.3663	10.0156	106.357	10.2148	3.36243	3.47862e-07	6.43181e-06
-	177.105	230.59	1340.26	7.61259	15.5383	55.0856	582.652	26.0788	4.48951	3.53054e-07	6.51443e-06
TAF4B	281.382	211.919	765.439	29.3628	58.4971	68.8571	419.58	52.239	3.00643	3.54369e-07	6.53334e-06
-	14.8967	4.66781	31.7692	78.3009	258.667	410.638	17.1112	249.202	-3.8679	3.56697e-07	6.57087e-06
C15H11orf63	2.48278	3.73425	1.98557	59.8132	38.3887	26.2909	2.7342	41.4976	-3.92423	4.04931e-07	7.3452e-06
DUOX1	0.827593	0	0	67.4258	37.4747	22.535	0.275864	42.4785	-7.01867	4.12459e-07	7.45173e-06
TMC5	0	5.60138	1.98557	80.4759	37.4747	47.574	2.52898	55.1749	-4.47263	4.16084e-07	7.5112e-06
-	183.726	252.062	105.235	4.35005	30.1626	18.7792	180.341	17.7639	3.33492	4.49966e-07	8.05823e-06
HOXA11	0	0	0	17.4002	50.271	18.7792	0	28.8168	-7.4244	4.59827e-07	8.20648e-06
ND3	37.2417	60.6816	310.742	1546.44	1367.37	1944.27	136.222	1619.36	-3.57283	4.61598e-07	8.22076e-06
-	10.7587	34.5418	4.96393	244.69	249.527	98.9038	16.7548	197.707	-3.56144	4.65474e-07	8.28323e-06
ANKRD37	21.5174	23.3391	11.9134	234.903	172.749	60.0934	18.9233	155.915	-3.0408	4.93066e-07	8.75347e-06
SLCO5A1	18.2071	10.2692	3.97115	110.926	104.198	62.5973	10.8158	92.5739	-3.08339	5.01575e-07	8.87828e-06
COLGALT2	703.454	998.912	130.055	23.9253	78.6055	48.8259	610.807	50.4522	3.59529	5.25031e-07	9.24802e-06
TTC22	9.93112	3.73425	1.98557	30.4503	88.6597	132.706	5.21698	83.9388	-3.98426	5.40506e-07	9.4835e-06
LOC105602076	17.3795	11.2028	0.992787	170.739	122.478	83.8804	9.85833	125.699	-3.65793	5.61798e-07	9.81882e-06
ILDR1	8.27593	6.53494	6.94951	36.9754	82.2616	55.0856	7.25346	58.1075	-3.0015	5.79437e-07	1.00413e-05
AIF1L	699.316	899.021	4516.19	146.814	193.772	235.366	2038.17	191.984	3.40838	5.96024e-07	1.02813e-05
-	2.48278	1.86713	0	88.0885	27.4205	28.7948	1.44997	48.1013	-5.00986	6.01661e-07	1.03547e-05
STXBP5L	180.415	53.2131	179.694	9.78761	20.1084	18.7792	137.774	16.2251	3.08449	6.26145e-07	1.07351e-05
LOC101108033	204.416	101.758	514.264	8580.47	6399.04	533.329	273.479	5170.95	-4.24122	6.34434e-07	1.08524e-05
PLVAP	120.001	160.573	1214.18	27.1878	29.2486	35.0545	498.251	30.497	4.03079	6.47571e-07	1.10519e-05
PDZD4	3.31037	20.5384	16.8774	157.689	116.08	90.1401	13.5754	121.303	-3.17068	6.67635e-07	1.13568e-05
LIPG	118.346	92.4227	121.12	13.0501	2.74205	21.2831	110.63	12.3584	3.19233	6.95106e-07	1.1773e-05
PLEKHS1	2.48278	0	1.98557	91.351	42.9588	18.7792	1.48945	51.0297	-5.08327	6.95576e-07	1.1773e-05
DNALI1	7.44834	19.6048	14.8918	207.715	115.166	55.0856	13.9817	125.989	-3.17855	7.11406e-07	1.19958e-05
-	57.9315	66.2829	28.7908	5.43756	1.82803	5.00779	51.0018	4.09113	3.67337	7.13648e-07	1.20247e-05
LRP2	9.93112	4.66781	3.97115	33.7129	64.8952	116.431	6.19003	71.6797	-3.51547	7.26689e-07	1.22169e-05
LRRC56	0	0	0	53.2881	27.4205	10.0156	0	30.2414	-7.49087	7.44251e-07	1.24656e-05
ESPL1	642.213	1489.97	968.96	29.3628	112.424	201.563	1033.71	114.45	3.17676	7.55815e-07	1.26218e-05
-	0	0	0.992787	76.1259	29.2486	21.2831	0.330929	42.2192	-7.00891	7.93077e-07	1.31659e-05
FBXO5	196.967	428.505	254.153	13.0501	31.0766	66.3532	293.209	36.8266	3.00032	8.09626e-07	1.33716e-05
LOC105615880	40.5521	83.0871	19.8557	0	0.914017	0	47.8316	0.304672	6.95602	8.47774e-07	1.392e-05
COL4A4	6764.75	4488.57	1230.06	200.102	433.244	711.106	4161.13	448.151	3.21531	8.73856e-07	1.43064e-05
COL5A1	2399.19	3653.96	12343.3	387.154	1077.63	388.103	6132.16	617.628	3.3111	8.82999e-07	1.44247e-05
-	7.44834	10.2692	0.992787	44.588	89.5737	82.6285	6.23677	72.2634	-3.5227	9.03432e-07	1.47478e-05
GMNC	0	0.933563	0	46.763	21.9364	36.3064	0.311188	35.002	-6.73514	9.13834e-07	1.48744e-05
SUSD1	93.5181	138.167	865.71	28.2753	21.9364	25.0389	365.798	25.0836	3.86663	9.48621e-07	1.54184e-05
LOC101107770	0	7.4685	0	73.9508	76.7775	63.8493	2.4895	71.5259	-4.85657	9.58468e-07	1.55559e-05
TM4SF4	0.827593	0	0.992787	80.4759	33.8186	21.2831	0.606793	45.1925	-6.21717	9.92824e-07	1.60211e-05
PNOC	16.5519	3.73425	5.95672	185.965	42.0448	112.675	8.74761	113.562	-3.68355	1.0198e-06	1.63976e-05
LOC105603540	95.1732	40.1432	19.8557	2.17502	1.82803	0	51.7241	1.33435	5.21784	1.02839e-06	1.64888e-05
-	26.483	35.4754	79.4229	0	2.74205	2.50389	47.1271	1.74865	4.7377	1.08375e-06	1.72778e-05
CCDC65	23.1726	19.6048	3.97115	395.854	166.351	68.8571	15.5829	210.354	-3.74874	1.09528e-06	1.74493e-05
CFAP57	6.62075	8.40206	2.97836	81.5634	44.7869	40.0623	6.00039	55.4709	-3.20059	1.11513e-06	1.77404e-05
MYB	4.13797	12.1363	9.92787	107.664	45.7009	65.1012	8.73405	72.8219	-3.06922	1.1682e-06	1.84673e-05
-	61.2419	54.1466	153.882	7.61259	10.9682	13.7714	89.7568	10.7841	3.06086	1.26563e-06	1.98264e-05
FAM166B	31.4486	9.33563	36.7331	478.505	255.925	87.6363	25.8391	274.022	-3.40726	1.2674e-06	1.98404e-05
NXPE2	1.65519	1.86713	1.98557	108.751	27.4205	18.7792	1.83596	51.6503	-4.81886	1.28304e-06	2.00574e-05
LOC105604936	0.827593	0	0	58.7257	21.0224	28.7948	0.275864	36.1809	-6.78434	1.28787e-06	2.01049e-05
GAP43	0.827593	1.86713	3.97115	50.0256	181.889	11.2675	2.22196	81.0609	-5.21662	1.3058e-06	2.03565e-05
GLDN	101.794	433.173	6021.25	4.35005	6.39812	25.0389	2185.41	11.929	7.52312	1.3428e-06	2.08468e-05
C24H16orf89	4.13797	3.73425	0	32.6254	70.3793	36.3064	2.62407	46.4371	-4.1178	1.35411e-06	2.09644e-05
IRX6	0	2.80069	0.992787	16.3127	65.8093	51.3298	1.26449	44.4839	-5.17094	1.41764e-06	2.18279e-05
LOC105605155	62.8971	183.912	55.5961	9.78761	12.7962	12.5195	100.802	11.7011	3.10584	1.48183e-06	2.26768e-05
LOC105615321	8.27593	10.2692	1.98557	58.7257	60.3252	51.3298	6.84357	56.7935	-3.04115	1.51136e-06	2.30256e-05
KDF1	3.31037	0.933563	0	14.1377	92.3158	57.5895	1.41465	54.681	-5.21738	1.51179e-06	2.30256e-05
-	14.0691	7.4685	3.97115	112.014	85.0036	40.0623	8.50291	79.0266	-3.20298	1.5942e-06	2.41015e-05
PRSS22	1.65519	5.60138	1.98557	25.0128	42.9588	63.8493	3.08071	43.9403	-3.83973	1.61323e-06	2.43268e-05
-	0	0	0	43.5005	23.7645	10.0156	0	25.7602	-7.25967	1.61343e-06	2.43268e-05
OVOL2	2.48278	6.53494	3.97115	26.1003	74.9494	48.8259	4.32962	49.9585	-3.54102	1.64596e-06	2.4751e-05
-	0	0.933563	0	81.5634	27.4205	16.2753	0.311188	41.7531	-6.99306	1.67418e-06	2.51113e-05
-	0	0	0	44.588	11.8822	18.7792	0	25.0831	-7.21739	1.83031e-06	2.725e-05
LOC105610726	22.345	55.0802	35.7403	1.08751	2.74205	1.25195	37.7218	1.69384	4.42926	1.83196e-06	2.72566e-05
SULT2B1	3.31037	5.60138	1.98557	34.8004	37.4747	37.5584	3.63244	36.6112	-3.32882	1.84484e-06	2.7412e-05
-	29.7934	51.3459	226.355	8.7001	3.65607	5.00779	102.498	5.78798	4.15088	1.92893e-06	2.85109e-05
GPX2	27.3106	99.8912	3.97115	629.67	580.401	684.815	43.7243	631.628	-3.85221	1.93083e-06	2.85203e-05
CLDN23	0.827593	0	0	23.9253	28.3345	37.5584	0.275864	29.9394	-6.51018	1.95808e-06	2.87906e-05
LOC106990291	4.96556	5.60138	0	57.6381	53.927	35.0545	3.52231	48.8732	-3.77259	1.96723e-06	2.89062e-05
CLRN2	0.827593	0	0	28.2753	88.6597	13.7714	0.275864	43.5688	-7.05899	1.98587e-06	2.91231e-05
E2F7	152.277	445.309	376.266	14.1377	14.6243	68.8571	324.618	32.5397	3.32942	2.04257e-06	2.98187e-05
-	1.65519	1.86713	1.98557	28.2753	24.6785	36.3064	1.83596	29.7534	-4.02016	2.07796e-06	3.01981e-05
LOC106990945	73.6558	78.4193	10.9207	0	1.82803	1.25195	54.3319	1.02666	5.69296	2.13499e-06	3.0893e-05
LOC101111178	0	0	0	27.1878	21.0224	13.7714	0	20.6605	-6.94131	2.27987e-06	3.2595e-05
GJB7	0.827593	0	0	67.4258	21.9364	20.0311	0.275864	36.4644	-6.79694	2.37921e-06	3.38977e-05
PRKX	244.14	183.912	1220.13	25.0128	74.0354	43.8181	549.396	47.6221	3.52517	2.44349e-06	3.466e-05
GRHL1	192.002	130.699	381.23	11.9626	6.39812	46.322	234.644	21.5609	3.46059	2.67504e-06	3.74722e-05
LOC101111253	13.2415	22.4055	7.94229	131.589	48.4429	172.769	14.5298	117.6	-3.01237	2.69671e-06	3.77523e-05
TGM1	3.31037	8.40206	8.93508	21.7502	99.6279	155.241	6.88251	92.2065	-3.7525	2.72202e-06	3.79884e-05
KIAA1210	77.7938	51.3459	50.6321	4.35005	9.14017	0	59.9239	4.49674	3.67448	2.75465e-06	3.83386e-05
KIF14	554.488	1743.89	1152.63	6.52507	27.4205	158.997	1150.34	64.3143	4.16516	2.75602e-06	3.83386e-05
PLD5	2.48278	0.933563	2.97836	56.5506	32.9046	20.0311	2.13157	36.4955	-4.101	2.75733e-06	3.83386e-05
CCDC81	0	7.4685	6.94951	135.939	72.2074	40.0623	4.806	82.7362	-4.12747	2.84882e-06	3.94887e-05
NOVA2	50.4832	45.7446	108.214	8.7001	10.9682	3.75584	68.1472	7.80805	3.0993	2.85478e-06	3.9501e-05
TP73	8.27593	3.73425	12.9062	89.176	72.2074	38.8103	8.30547	66.7312	-3.01399	2.88602e-06	3.98572e-05
IL17RE	3.31037	5.60138	8.93508	30.4503	76.7775	53.8337	5.94894	53.6872	-3.19207	2.89182e-06	3.99128e-05
CD101	141.518	232.457	60.56	1.08751	16.4523	15.0234	144.845	10.8544	3.73571	2.92527e-06	4.0325e-05
PRR11	232.554	514.393	529.155	3.26254	3.65607	57.5895	425.367	21.5027	4.32082	2.97879e-06	4.09375e-05
LOC105606593	5.79315	12.1363	0.992787	70.6883	58.4971	60.0934	6.30742	63.0929	-3.31526	3.05831e-06	4.18515e-05
LOC101108432	52.1384	17.7377	24.8197	485.03	204.74	106.415	31.5652	265.395	-3.06825	3.10185e-06	4.237e-05
TNFRSF13C	128.277	229.656	28.7908	1629.09	678.201	1027.85	128.908	1111.71	-3.10778	3.52688e-06	4.73992e-05
ESRP1	29.7934	70.0172	7.94229	227.29	380.231	314.239	35.9176	307.253	-3.09574	3.55885e-06	4.77717e-05
LOC105606457	3.31037	3.73425	3.97115	26.1003	31.0766	58.8415	3.67192	38.6728	-3.39541	3.68764e-06	4.92792e-05
-	32.2761	30.8076	40.7043	1.08751	3.65607	3.75584	34.596	2.83314	3.60731	3.71163e-06	4.9498e-05
TMEM178A	9.93112	18.6713	9.92787	157.689	125.22	36.3064	12.8434	106.405	-3.05388	4.00685e-06	5.29642e-05
-	2.48278	0	0	41.3255	33.8186	22.535	0.827593	32.5597	-5.19728	4.2551e-06	5.60156e-05
RNF128	643.04	1319.12	4789.2	187.052	253.183	343.033	2250.46	261.089	3.10782	4.2746e-06	5.62394e-05
PLAU	182.071	283.803	2099.74	63.0757	48.4429	81.3765	855.206	64.2984	3.73455	4.35166e-06	5.70199e-05
SLCO4A1	22.345	30.8076	253.161	3.26254	0.914017	6.25973	102.104	3.47876	4.91212	4.40025e-06	5.75895e-05
RUNX2	1065.94	184.845	2064	88.0885	159.953	82.6285	1104.93	110.223	3.32402	4.52567e-06	5.89568e-05
LOC105611006	1.65519	6.53494	0	58.7257	67.6373	26.2909	2.73004	50.8846	-4.21998	4.57416e-06	5.94234e-05
LOC101115614	424.555	455.579	2737.11	100.051	121.564	161.501	1205.75	127.706	3.23941	4.84149e-06	6.23852e-05
TMEM229B	1879.46	1482.5	11255.2	262.09	233.074	733.641	4872.4	409.602	3.57284	4.95882e-06	6.35267e-05
PLA2G4F	0	1.86713	0	27.1878	27.4205	37.5584	0.622375	30.7222	-5.64832	5.05659e-06	6.45532e-05
FOXE1	0	0	0	29.3628	13.7103	15.0234	0	19.3655	-6.84506	5.0729e-06	6.46637e-05
KLHL31	61.2419	14.0034	10.9207	0	0	0	28.722	0	7.18484	5.17497e-06	6.58157e-05
-	1.65519	1.86713	0	68.5133	36.5607	12.5195	1.1741	39.1978	-5.03137	5.26044e-06	6.67143e-05
CCNF	529.66	1078.26	768.417	21.7502	69.4653	187.792	792.114	93.0025	3.09353	5.44528e-06	6.87485e-05
LOC105603461	0	0	0	43.5005	9.14017	16.2753	0	22.972	-7.09047	5.64017e-06	7.08119e-05
KCNK4	0.827593	0.933563	0.992787	44.588	58.4971	8.76363	0.917981	37.2829	-5.35493	5.7001e-06	7.14755e-05
SYT7	29.7934	29.874	229.334	7.61259	0.914017	2.50389	96.3337	3.67683	4.72275	5.70255e-06	7.14755e-05
-	0.827593	10.2692	0.992787	96.7886	25.5925	136.462	4.02986	86.2811	-4.42461	5.81174e-06	7.27001e-05
-	39.7245	40.1432	17.8702	2.17502	1.82803	1.25195	32.5793	1.75167	4.20447	5.90669e-06	7.3581e-05
TPD52L1	8.27593	5.60138	0.992787	68.5133	54.841	32.5506	4.9567	51.9683	-3.36877	5.91839e-06	7.36071e-05
MYL10	19.8622	8.40206	6.94951	176.177	57.5831	65.1012	11.7379	99.6204	-3.07414	6.19285e-06	7.67207e-05
LOC101112356	20.6898	9.33563	316.699	2.17502	1.82803	3.75584	115.575	2.5863	5.49926	6.30053e-06	7.77158e-05
UNC79	52.966	42.0103	58.5744	0	3.65607	8.76363	51.1836	4.1399	3.66657	6.41664e-06	7.88886e-05
-	3.31037	14.0034	2.97836	88.0885	55.7551	48.8259	6.76406	64.2232	-3.25136	6.46225e-06	7.93626e-05
LOC101108561	4.13797	2.80069	6.94951	56.5506	25.5925	43.8181	4.62939	41.9871	-3.18726	6.52766e-06	8.00349e-05
-	66.2075	125.097	115.163	6.52507	24.6785	5.00779	102.156	12.0704	3.05119	6.58117e-06	8.0468e-05
KIF20A	606.626	1242.57	1579.52	33.7129	58.4971	264.161	1142.91	118.79	3.26919	6.68722e-06	8.15913e-05
ITGB6	0.827593	0	0.992787	41.3255	23.7645	22.535	0.606793	29.2083	-5.58643	6.77757e-06	8.25581e-05
LOC101104815	9.10353	7.4685	2.97836	88.0885	21.9364	108.919	6.5168	72.9814	-3.4706	6.78263e-06	8.25581e-05
COL15A1	1212.42	2237.75	11775.4	528.531	421.362	598.43	5075.21	516.108	3.29782	6.88396e-06	8.3539e-05
ANKRD66	8.27593	9.33563	1.98557	150.077	52.099	33.8026	6.53238	78.6594	-3.5808	6.96688e-06	8.43633e-05
TMPRSS4	0	0	3.97115	35.8879	106.94	18.7792	1.32372	53.869	-5.41209	7.05929e-06	8.53905e-05
TFF1	1.65519	0.933563	1.98557	17.4002	30.1626	36.3064	1.52477	27.9564	-4.1973	7.14217e-06	8.63085e-05
AKAP14	0.827593	5.60138	2.97836	175.089	33.8186	17.5273	3.13578	75.4785	-4.60283	7.20957e-06	8.69746e-05
LOC105604393	0	0.933563	0	27.1878	26.5065	20.0311	0.311188	24.5752	-6.22962	7.34035e-06	8.84575e-05
-	104.277	70.9508	106.228	1090.77	1058.43	137.714	93.8186	762.307	-3.02276	7.5713e-06	9.08145e-05
DNAI2	21.5174	11.2028	1.98557	152.252	125.22	62.5973	11.5686	113.356	-3.28004	7.87041e-06	9.37412e-05
KIAA1549L	10.7587	26.1398	7.94229	43.5005	162.695	187.792	14.9469	131.329	-3.13518	7.98872e-06	9.47992e-05
-	0.827593	3.73425	1.98557	44.588	33.8186	18.7792	2.18247	32.3953	-3.91385	8.62197e-06	0.000101188
-	81.9318	89.622	181.68	4.35005	10.9682	27.5428	117.745	14.287	3.0593	8.63375e-06	0.000101226
LOC105603284	4.13797	0.933563	5.95672	47.8505	20.1084	85.1324	3.67608	51.0304	-3.7946	8.90733e-06	0.000103893
TBPL2	3.31037	5.60138	0.992787	25.0128	60.3252	33.8026	3.30151	39.7135	-3.58279	9.01758e-06	0.000104961
LOC105611613	0	0	0	7.61259	22.8504	28.7948	0	19.7526	-6.87268	9.22553e-06	0.000106939
LOC105609290	13.2415	23.3391	2.97836	157.689	88.6597	78.8726	13.1863	108.407	-3.03504	9.23352e-06	0.000106977
LOC105603974	31.4486	34.5418	24.8197	2.17502	1.82803	3.75584	30.27	2.5863	3.58506	9.31169e-06	0.000107661
RBBP8NL	0	0	0	7.61259	24.6785	26.2909	0	19.5273	-6.85731	9.45008e-06	0.000108925
-	0	0	0.992787	55.4631	17.3663	16.2753	0.330929	29.7016	-6.50092	9.46433e-06	0.000109034
CENPF	2448.02	5753.55	3230.53	43.5005	85.0036	691.074	3810.7	273.193	3.80328	9.49276e-06	0.000109305
ARHGDIG	1.65519	10.2692	4.96393	85.9135	103.284	22.535	5.62944	70.5775	-3.66188	9.51174e-06	0.000109412
LGALS2	4.96556	1.86713	13.899	40.238	60.3252	135.21	6.91057	78.5911	-3.51718	9.65928e-06	0.000110995
LOC105602914	81.9318	154.971	8.93508	2.17502	6.39812	2.50389	81.9461	3.69235	4.44583	1.02622e-05	0.00011685
VSNL1	3.31037	5.60138	2.97836	45.6755	33.8186	25.0389	3.96337	34.8444	-3.1393	1.03458e-05	0.000117564
TFR2	651.316	401.432	6795.63	194.665	126.134	211.579	2616.12	177.459	3.8822	1.0419e-05	0.000118277
LOC101108797	4.13797	0.933563	4.96393	26.1003	33.8186	46.322	3.34515	35.4137	-3.40192	1.10626e-05	0.000124827
AZGP1	4.96556	9.33563	0	117.451	70.3793	31.2987	4.76706	73.0431	-3.92943	1.12768e-05	0.000126857
-	0	0	0	15.2252	15.5383	17.5273	0	16.0969	-6.57799	1.13805e-05	0.000127901
LOC101103133	10.7587	12.1363	21.8413	34.8004	127.048	236.618	14.9121	132.822	-3.15814	1.14231e-05	0.000128188
MYBPC1	39.7245	48.5453	4.96393	320.816	285.173	161.501	31.0779	255.83	-3.0383	1.23174e-05	0.000136927
SPAG5	633.109	1320.06	943.147	34.8004	65.8093	260.405	965.438	120.338	3.00714	1.3236e-05	0.000145557
ECT2L	6.62075	10.2692	2.97836	90.2635	47.5289	31.2987	6.62277	56.3637	-3.08513	1.36654e-05	0.000149694
LOC105616620	30.621	52.2795	43.6826	2.17502	8.22616	3.75584	42.1944	4.71901	3.12406	1.39796e-05	0.000152624
LOC101103439	4.13797	2.80069	1.98557	7.61259	60.3252	110.171	2.97474	59.3697	-4.30535	1.39914e-05	0.000152672
MYL7	7.44834	7.4685	0	122.889	82.2616	26.2909	4.97228	77.1471	-3.94147	1.45878e-05	0.000158182
DOCK3	4124.73	1658.01	205.507	13.0501	50.271	224.098	1996.08	95.8065	4.38299	1.46538e-05	0.000158506
UPK3A	0.827593	1.86713	0.992787	45.6755	22.8504	15.0234	1.22917	27.8498	-4.51258	1.51927e-05	0.000163248
LOC105605743	0	0	0	28.2753	22.8504	6.25973	0	19.1285	-6.83222	1.52147e-05	0.000163405
-	1.65519	5.60138	0	32.6254	27.4205	55.0856	2.41885	38.3772	-3.97892	1.54989e-05	0.000165904
HJURP	563.591	1247.24	773.381	3.26254	15.5383	132.706	861.404	50.5024	4.09786	1.56694e-05	0.00016749
-	424.555	91.4891	1090.08	60.9007	53.013	66.3532	535.375	60.089	3.15594	1.5748e-05	0.00016825
TMEM200A	936.836	1584.26	5536.77	228.378	151.727	569.636	2685.95	316.58	3.08564	1.58597e-05	0.000169363
LOC105605454	24.0002	27.0733	7.94229	0	0	0	19.6719	0	6.63753	1.62725e-05	0.00017287
PKP1	0	0	0	6.52507	21.0224	28.7948	0	18.7807	-6.79935	1.6469e-05	0.000174627
-	3.31037	1.86713	5.95672	81.5634	31.0766	21.2831	3.71141	44.641	-3.59896	1.80445e-05	0.000189991
DCBLD2	1797.53	2347.91	13366.9	669.907	794.281	717.365	5837.44	727.185	3.00487	1.8058e-05	0.000190043
CA12	29.7934	41.0768	221.391	2.17502	10.9682	1.25195	97.4205	4.79839	4.30211	1.82285e-05	0.00019148
LOC106991501	24.0002	19.6048	9.92787	0	0	0	17.8443	0	6.49736	1.87082e-05	0.00019597
GPR4	52.1384	61.6151	387.187	20.6627	6.39812	13.7714	166.98	13.6108	3.6221	1.89766e-05	0.000198137
C12H1orf158	4.13797	0	0	40.238	34.7327	26.2909	1.37932	33.7538	-4.53386	1.90109e-05	0.000198328
LOC105607239	14.8967	10.2692	0	180.527	90.4877	63.8493	8.38862	111.621	-3.7209	1.90126e-05	0.000198328
WDR49	2.48278	0	0	57.6381	19.1944	21.2831	0.827593	32.7052	-5.21079	1.94047e-05	0.000202044
LOC106991735	2121.95	453.711	40.7043	41.3255	60.3252	53.8337	872.122	51.8281	4.07258	1.9644e-05	0.000204252
LOC105614851	319.451	69.0836	9.92787	5.43756	2.74205	10.0156	132.821	6.06506	4.47242	1.96898e-05	0.000204633
UHRF1	802.766	2277.89	2099.74	79.3884	75.8635	449.449	1726.8	201.567	3.10065	1.98866e-05	0.000206306
-	11.5863	11.2028	0.992787	45.6755	72.2074	95.1479	7.92728	71.0103	-3.14854	2.03085e-05	0.000210094
LOC105605124	22.345	47.6117	24.8197	0	2.74205	0	31.5921	0.914017	4.95169	2.03792e-05	0.000210535
-	9.10353	44.811	73.4662	1.08751	2.74205	0	42.4602	1.27652	4.96204	2.20922e-05	0.000225745
LOC105602164	17.3795	7.4685	2.97836	95.7011	115.166	36.3064	9.27544	82.3912	-3.13806	2.2142e-05	0.000226151
-	0.827593	0	0.992787	96.7886	23.7645	6.25973	0.606793	42.2709	-6.12131	2.36327e-05	0.000239207
LOC105604834	28.9658	67.2165	20.8485	4.35005	0	1.25195	39.0103	1.86733	4.4193	2.383e-05	0.000240771
LOC101104325	2.48278	11.2028	8.93508	36.9754	95.9718	48.8259	7.5402	60.5911	-3.02253	2.43724e-05	0.00024515
BCAS1	3.31037	14.0034	4.96393	76.1259	93.2298	28.7948	7.42592	66.0501	-3.16212	2.44654e-05	0.000245867
-	8.27593	14.0034	0.992787	67.4258	53.927	72.6129	7.75739	64.6552	-3.04973	2.46449e-05	0.00024756
PLEKHD1	6.62075	0.933563	12.9062	42.413	69.4653	72.6129	6.82018	61.4971	-3.18072	2.57225e-05	0.000256325
SLC17A9	51.3108	121.363	1005.69	23.9253	33.8186	26.2909	392.789	28.0116	3.80795	2.61043e-05	0.00025967
LOC101123148	0.827593	4.66781	8.93508	70.6883	19.1944	102.66	4.81016	64.1808	-3.75596	2.70821e-05	0.000268094
PKP3	2.48278	1.86713	7.94229	43.5005	64.8952	21.2831	4.0974	43.2263	-3.42399	2.74116e-05	0.000271117
RTP1	0	1.86713	0	40.238	24.6785	16.2753	0.622375	27.0639	-5.46759	2.7659e-05	0.000273324
DPF3	370.762	142.835	817.063	3.26254	35.6467	66.3532	443.553	35.0875	3.66341	2.77458e-05	0.000274061
-	0	0	0	44.588	23.7645	2.50389	0	23.6188	-7.13476	2.79217e-05	0.000275316
HOXC10	1.65519	9.33563	0	60.9007	69.4653	33.8026	3.6636	54.7229	-3.90311	2.90601e-05	0.000285416
HOXA4	9.93112	35.4754	2.97836	144.639	148.985	115.179	16.1283	136.268	-3.07871	2.93584e-05	0.000287843
DPY19L2	0.827593	0	0	22.8378	15.5383	22.535	0.275864	20.3037	-5.94923	2.97855e-05	0.000291016
DOC2B	119.173	89.622	629.427	25.0128	28.3345	43.8181	279.407	32.3885	3.11105	3.05851e-05	0.000297923
MTUS2	1316.7	1127.74	29.7836	43.5005	48.4429	80.1246	824.743	57.356	3.84727	3.245e-05	0.000313781
CPNE4	71.173	39.2096	282.944	11.9626	14.6243	17.5273	131.109	14.7047	3.1576	3.40007e-05	0.000325006
SLC6A17	28.9658	50.4124	363.36	3.26254	8.22616	16.2753	147.579	9.25467	4.00442	3.48722e-05	0.00033249
-	904.56	1130.54	132.041	25.0128	79.5195	128.95	722.382	77.8276	3.21597	3.50594e-05	0.00033385
-	49.6556	84.9542	44.6754	0	10.0542	6.25973	59.7617	5.43797	3.43872	3.59032e-05	0.000340876
-	3.31037	1.86713	3.97115	40.238	14.6243	43.8181	3.04955	32.8935	-3.42691	3.67931e-05	0.000347566
ANKRD65	0.827593	5.60138	0.992787	114.189	44.7869	8.76363	2.47392	55.9131	-4.50683	3.82578e-05	0.000360042
LOC101108480	3.31037	0.933563	4.96393	52.2006	8.22616	107.667	3.06929	56.0314	-4.19076	3.87452e-05	0.000363716
LOC101121256	21.5174	28.9404	53.6105	0	0.914017	5.00779	34.6895	1.97393	4.21848	3.87676e-05	0.000363775
LOC101118439	19.0346	37.3425	4.96393	0	0	0	20.447	0	6.69227	3.9057e-05	0.000365881
KRT17	0.827593	4.66781	0	108.751	32.9046	11.2675	1.8318	50.9745	-4.79995	4.01388e-05	0.000374561
ZSWIM2	1.65519	0.933563	0.992787	38.0629	21.9364	12.5195	1.19385	24.1729	-4.32457	4.20356e-05	0.000389409
LOC101123537	0	0	0	11.9626	9.14017	23.787	0	14.9633	-6.46721	4.24029e-05	0.000392416
LOC105610744	0	0	0.992787	77.2134	13.7103	6.25973	0.330929	32.3945	-6.62661	4.28941e-05	0.000396058
LKAAEAR1	40.5521	45.7446	21.8413	3.26254	6.39812	1.25195	36.046	3.63754	3.25902	4.39543e-05	0.000403365
LOC101111513	0	0	0	22.8378	21.9364	5.00779	0	16.594	-6.62807	4.40816e-05	0.000404369
-	8.27593	6.53494	57.5816	0	0	0	24.1308	0	6.92754	4.44316e-05	0.00040675
KRT15	1.65519	0.933563	0	3.26254	174.577	11.2675	0.862916	63.0358	-6.15468	4.72641e-05	0.000428672
SLC6A6	956.698	671.231	8033.63	213.152	340.015	401.875	3220.52	318.347	3.33866	4.73477e-05	0.000429257
LOC101105823	5.79315	5.60138	6.94951	55.4631	16.4523	83.8804	6.11468	51.9319	-3.08267	4.9934e-05	0.000450084
LOC105606667	52.1384	21.4719	22.8341	0	0	3.75584	32.1481	1.25195	4.83065	5.06809e-05	0.000456169
MYT1	0	0.933563	0	22.8378	15.5383	17.5273	0.311188	18.6344	-5.82735	5.11951e-05	0.000460061
-	48.0004	21.4719	85.3797	5.43756	6.39812	0	51.6173	3.94523	3.66493	5.12879e-05	0.000460343
WNT16	13.2415	2.80069	2.97836	36.9754	85.0036	46.322	6.34018	56.1004	-3.12576	5.16824e-05	0.000463146
LOC101105840	38.0693	4.66781	49.6393	0	0	1.25195	30.7921	0.417315	6.31998	5.27693e-05	0.000471947
CCL26	91.0353	103.625	795.222	1208.23	3248.42	6095.73	329.961	3517.46	-3.41458	5.45513e-05	0.000485569
FMR1NB	4.96556	23.3391	0.992787	58.7257	172.749	106.415	9.7658	112.63	-3.52859	5.86257e-05	0.000516728
FHOD3	170.484	155.905	1264.81	31.5379	87.7457	47.574	530.4	55.6192	3.25089	5.89837e-05	0.000519477
-	38.8969	46.6781	17.8702	3.26254	5.4841	2.50389	34.4817	3.75018	3.17322	5.95331e-05	0.000523701
LOC101112702	7.44834	1.86713	2.97836	42.413	18.2803	63.8493	4.09794	41.5142	-3.31469	5.97245e-05	0.000524769
LOC105609157	0	0	0	16.3127	5.4841	25.0389	0	15.6119	-6.52781	6.00617e-05	0.000526909
C1H1orf87	0	6.53494	0	95.7011	45.7009	22.535	2.17831	54.6457	-4.65946	6.04733e-05	0.000529695
-	12.4139	5.60138	0	155.514	45.7009	48.8259	6.00509	83.347	-3.77557	6.07364e-05	0.000531792
-	14.0691	12.1363	0	137.027	59.4111	86.3843	8.73513	94.274	-3.41962	6.11089e-05	0.000534448
-	2.48278	4.66781	0	35.8879	22.8504	28.7948	2.38353	29.1777	-3.59623	6.31156e-05	0.000549418
LOC101111846	54.6212	79.3528	19.8557	2.17502	9.14017	1.25195	51.2766	4.18905	3.56306	6.37719e-05	0.000554488
PLK5	0	0.933563	0	13.0501	15.5383	28.7948	0.311188	19.1277	-5.86099	6.39553e-05	0.000555868
-	0.827593	4.66781	0	15.2252	59.4111	31.2987	1.8318	35.3117	-4.27292	6.58634e-05	0.000571349
RHOV	1.65519	0.933563	0	29.3628	27.4205	11.2675	0.862916	22.6836	-4.66498	6.76424e-05	0.000583857
[truncated: 254 more rows]
